# Supplementary material
Source: PubMed Central journal article supplement (PMC8049592)
Supplement: mmc1.pdf [file mmc1.pdf]

# THE LANCET

## Global Health

### Supplementary appendix 1

This translation in Chinese was submitted by the authors and we reproduce it as supplied. It has not been peer reviewed. *The Lancet's* editorial processes have only been applied to the original in English, which should serve as reference for this manuscript.

此简体中文译文由作者提交，我方按照提供的版本刊登。此译文并未经过同行审阅。医学期刊《柳叶刀》的编辑流程仅适用于英文原稿，英文原稿应作为此手稿的参考。

Supplement to: Chen X, Chen Z, Azman AS, et al. Serological evidence of human infection with SARS-CoV-2: a systematic review and meta-analysis. *Lancet Glob Health* 2021; published online March 8. [http://dx.doi.org/10.1016/S2214-109X\(21\)00026-7](http://dx.doi.org/10.1016/S2214-109X(21)00026-7).

## 人感染新型冠状病毒的血清学证据：一项系统性综述和荟萃分析

**背景：**全球针对新型冠状病毒（Severe Acute Respiratory Syndrome Coronavirus 2, SARS-CoV-2）的血清学研究正在快速涌现。本研究旨在汇总和评估这些血清学数据。

**方法：**本研究是一项系统性综述和荟萃分析，系统检索了2019年12月1日至2020年12月22日期间发表在PubMed, Embase, Web of Science和5个预印本平台的英文文献。纳入的研究需报道人感染SARS-CoV-2的证据，且采样时间晚于研究当地出现第一例确诊病例的时间。仅针对确诊病人、感染情况已知的标本的血清学实验和动物实验予以排除。所有分析数据均来源于纳入的文献。本研究采用标准化的评分系统定量评估了研究质量，估计了不同WHO区域和不同暴露水平人群的血清阳性率，计算了社区一般人群中不同年龄、性别和人种的血清阳性率，估算了血清学证实的感染者数量与确诊病例数的比值（此后简称“感染者-病例比值”）。本研究已在PROSPERO注册（CRD42020198253）。

**结果：**本研究共检索到16,506篇文献，经去重、标题和摘要的初筛后获得2,503篇文献，最终纳入404篇血清学研究，涵盖51,680,360名研究对象。在82篇高质量研究中，密切接触者（18.0%, 95% CI 15.7-20.3）和高暴露风险的医务工作者（17.1%, 9.9-24.4）的血清阳性率高于低暴露风险的医务工作者（4.2%, 1.5-6.9）和社区一般人群（8.0%, 6.8-9.2）。研究之间的异质性较大，汇总的 $I^2$ 高达99.9%（ $P < 0.01$ ）。不同WHO区域的血清阳性率差异很大，其中西太平洋区的社区一般人群的血清阳性率最低（1.7%, 95% CI 0.0-5.0），美洲区（6.9, 95% CI 2.7-17.3）和欧洲区（8.4, 6.5-10.7）的感染者-病例比值相近，而东南亚区（均为在印度开展的研究）的感染者-病例比值较高（56.5, 28.5-112.0）。

**解释：**本研究提示由自然感染所产生抗体介导的群体免疫在大多数地区远未实现。而不同WHO区域内的感染者-病例比值估计有助于深入了解真实感染者的数量。
