# Supplementary material
Source: PubMed Central journal article supplement (PMC8049592)
Supplement: mmc2.pdf [file mmc2.pdf]

# THE LANCET

## Global Health

### Supplementary appendix 2

This appendix formed part of the original submission and has been peer reviewed. We post it as supplied by the authors.

Supplement to: Chen X, Chen Z, Azman AS, et al. Serological evidence of human infection with SARS-CoV-2: a systematic review and meta-analysis. *Lancet Glob Health* 2021; published online March 8. [http://dx.doi.org/10.1016/S2214-109X\(21\)00026-7](http://dx.doi.org/10.1016/S2214-109X(21)00026-7).

## Supplementary appendix

### Contents

|                                                                                                                                                                                                                                                           |            |
|-----------------------------------------------------------------------------------------------------------------------------------------------------------------------------------------------------------------------------------------------------------|------------|
| <b>Methods and results .....</b>                                                                                                                                                                                                                          | <b>4</b>   |
| <b>Supplementary Tables.....</b>                                                                                                                                                                                                                          | <b>10</b>  |
| <i>Table S1. Search strategy for three peer-reviewed databases and five preprint servers.....</i>                                                                                                                                                         | <i>10</i>  |
| <i>Table S2. Descriptive characteristics of serological studies included in the systematic review.....</i>                                                                                                                                                | <i>12</i>  |
| <i>Table S3. Summary of antibody detection assays to identify human infection with SARS-CoV-2 included in systematic review.....</i>                                                                                                                      | <i>55</i>  |
| <i>Table S4. Summary of studies reporting seroprevalence of human infections with SARS-CoV-2 included in systematic review.....</i>                                                                                                                       | <i>89</i>  |
| <i>Table S5. Scoring system used for evaluation of published reports describing seroevidence of human infection with SARS-CoV-2.....</i>                                                                                                                  | <i>145</i> |
| <i>Table S6. Definition of subjects included in meta-analysis.....</i>                                                                                                                                                                                    | <i>147</i> |
| <i>Table S7. Quality assessment of serological studies.....</i>                                                                                                                                                                                           | <i>149</i> |
| <i>Table S8. The summary of eighty-two grade A and grade B studies included into the main analysis on the basis of WHO regions and pre-defined study populations .....</i>                                                                                | <i>182</i> |
| <i>Table S9. Estimated seroprevalence of antibodies to SARS-CoV-2 by WHO regions and study population among eighty-two grade A and grade B studies .....</i>                                                                                              | <i>185</i> |
| <i>Table S10. Sensitivity analysis of seroprevalence of antibodies to SARS-CoV-2 among eighty-two grade A and grade B studies, considering alternative serological assays used in the same study and seropositive by any positives of the assays.....</i> | <i>188</i> |
| <i>Table S11. Sensitivity analysis of seroprevalence adjusted for test performance among eighty-two grade A and grade B studies.....</i>                                                                                                                  | <i>191</i> |
| <i>Table S12. Multivariable meta-regression for change in the seroprevalence of human antibodies to SARS-CoV-2 among eighty-two grade A and grade B studies.....</i>                                                                                      | <i>193</i> |

|                                                                                                                                                                        |            |
|------------------------------------------------------------------------------------------------------------------------------------------------------------------------|------------|
| <i>Table S13. Relative risk of infections with SARS-CoV-2 by age groups and sex among eighty-two grade A and grade B studies.....</i>                                  | <i>195</i> |
| <i>Table S14. The cumulative incidence and estimated number of serological infections of selected grade A and grade B studies involved of general population .....</i> | <i>197</i> |
| <i>Table S15. The data source of population size and COVID-19-related epidemiological data of grade A and grade B studies involved of general population .....</i>     | <i>199</i> |
| <i>Table S16. Sensitivity and specificity values used in the sensitivity analysis of seroprevalence adjusted for test performance.....</i>                             | <i>202</i> |
| <i>Table S17. Estimated seroprevalence of antibodies to SARS-CoV-2 by WHO regions and study populations among all 404 studies.....</i>                                 | <i>205</i> |
| <b>Appendix figures.....</b>                                                                                                                                           | <b>207</b> |
| <i>Figure S1. Quality scores assigned to SARS-CoV-2 serological studies by study populations, December 2019- December 2020. ....</i>                                   | <i>207</i> |
| <i>Figure S2. The starting sampling date for each serological study included in this meta-analysis in African Region .....</i>                                         | <i>208</i> |
| <i>Figure S3. The starting sampling date for each serological study included in this meta-analysis in region of the Americas .....</i>                                 | <i>209</i> |
| <i>Figure S4. The starting sampling date for each serological study included in this meta-analysis in Eastern Mediterranean Region .....</i>                           | <i>211</i> |
| <i>Figure S5. The starting sampling date for each serological study included in this meta-analysis in European Region .....</i>                                        | <i>212</i> |
| <i>Figure S6. The starting sampling date for each serological study included in this meta-analysis in South-East Asia Region.....</i>                                  | <i>214</i> |
| <i>Figure S7. The starting sampling date for each serological study included in this meta-analysis in Western Pacific Region .....</i>                                 | <i>215</i> |
| <i>Figure S8. The proportion of reported cases that occurred in each area by 2 weeks before the middle time point of each population-based serosurvey.....</i>         | <i>216</i> |
| <i>Figure S9. Geographical distribution of SARS-CoV-2 serosurveys in humans by study populations, December 2019-December 2020. ....</i>                                | <i>218</i> |
| <i>Figure S10. Estimated seroprevalence of antibodies to SARS-CoV-2 among grade A and grade B studies involving general populations by age group.....</i>              | <i>219</i> |

|                                                                                                                                                                    |            |
|--------------------------------------------------------------------------------------------------------------------------------------------------------------------|------------|
| <i>Figure S11. Estimated seroprevalence of antibodies to SARS-CoV-2 among grade A and grade B studies involving general populations by sex .....</i>               | <i>220</i> |
| <i>Figure S12. Estimated seroprevalence of antibodies to SARS-CoV-2 among grade A and grade B studies involving general populations by race.....</i>               | <i>222</i> |
| <i>Figure S13. Regression analysis between seroprevalence and local cumulative incidence among grade A and grade B studies involving general populations .....</i> | <i>223</i> |
| <i>Figure S14. Estimated seroprevalence by WHO regions and study populations among all 404 studies.....</i>                                                        | <i>225</i> |
| <b>References.....</b>                                                                                                                                             | <b>227</b> |



## **Methods and results**

### *Data extraction and variable list*

We screened all eligible studies to determine: 1) study characteristics, study population and related types/levels of exposure to SARS-CoV-2; 2) antibody detection assays used; 3) predefined outcomes, i.e., SARS-CoV-2 antibody seroprevalence

The following variables were extracted from qualified studies, including the author's name, publication date, study design, sampling period, study period, study population and location, age and occupation of participants, exposure setting, frequency and type of exposure, the use of personal protective equipment (PPE) for healthcare workers, laboratory methodology for serologic confirmation of SARS-CoV-2 infections (including assay methods, the manufacturer and related agency authorization, targeted immunoglobulin and antigens, days from exposure to sampling, experiment validations, sensitivity and specificity of the validated assay, cross-reactivity with other coronaviruses, seropositive threshold value, confirmatory assay and definitions of serological infections for each study), assessment of participants' symptom (including the number of symptomatic and asymptomatic serological infections), and predefined outcomes (i.e. the total number of participants, the number of participants provided single or paired sera, the number of seropositive

participants, adjustments of the results and potential risk factors for serological infections).

*Rationale for modifying scoring systems for antibody detection assays that focused on human infection with avian influenza SARS-CoV-2 virus*

In consideration of a published sero-epidemiological study protocol by Consortium for the Standardization of Influenza Seroepidemiology (CONSISE), an established scoring system for serological study concerning animal influenza exposure in humans, and a population-based seroepidemiological investigation protocol for COVID-19 from the WHO, we developed a modified scoring system to develop a more appropriate system to weigh the serological evidence for SARS-CoV-2 infections in humans.<sup>1-3</sup> In our scoring system, study design, laboratory assay and outcome adjustment are three main considerations. Studies reporting the method to recruit participants or sampling methods (e.g. convenient sample or randomly-selected samples) receive a higher score. Specifically, studies with detailed sampling framework, or using stratified/multi-stage sampling are assessed the highest points (3 points), followed by those studies with simplified random (2 points) or convenience sampling (1 point). If a study does not report how they recruited their study participants, the study receives zero points.

Multiple serological assays are available to detect SARS-CoV -2 antibodies, with various test performance (different sensitivity and specificity), different targeted antigens, immunoglobulin isotypes, and various positive threshold or cut-off values. It is difficult to compare the performance of different serological assays without a uniform “gold standard”. Studies using well-validated (previously evaluated in published paper) in-house serological assays, as well as those using detection kits approved by GPC/WHO-recognized national regulatory authority [e.g. Food and Drug administration (FDA), Conformité Européenne-In Vitro Diagnostics (CE-IVD), and National Medical Products Administration (NMPA)], are assigned 1 point. Additionally, if internal validations (using their own specimens to evaluate sensitivity and specificity) were performed prior to assay of population samples, they are assigned 2 points. Similarly, if a study used confirmatory assays, such as microneutralization assay (2 points) or other serological methods (1 point), to validate their initial screening results, additional points were given. If a study only used microneutralization assay to detect SARS-CoV-2 antibodies, 2 points were assigned to it.

For the outcome analysis, adjustment for the local demographic factors (mainly including age and sex) or test performance is of great importance to interpret the serological results. A total of four points are assigned for studies accounting for these two adjustments at the same time, with 2 points for each adjustment.

### *Quality assessment of serological studies*

Based on their overall score, the study quality was further classified into four Grades, A, B, C and D, according to their quartiles. Grade A spanned studies with a scores ranging from 10 to 12, Grade B from 7 to 9, Grade C from 4 to 6, and Grade D from 0 to 3.

### *Rationale for assessing asymptomatic and symptomatic SARS-CoV-2 infections*

We evaluated all included studies according to whether a study reported any acute respiratory illness (i.e. fever or respiratory symptoms) among participants during the COVID-19 epidemic. To distinguish symptomatic and asymptomatic serological infections among different populations, we recorded serologically-confirmed number of symptomatic or asymptomatic individuals for studies assessing participants' fever or other COVID-19 related respiratory symptoms.

Specifically, seroprevalence of symptomatic ( $p_{sym} =$

$\frac{\text{Number of symptomatic infections}}{\text{Total number of participants provided specimens}}$ ) and asymptomatic

infections ( $p_{asym} = \frac{\text{Number of asymptomatic infections}}{\text{Total number of participants provided specimens}}$ ) were calculated

based on the total number of participants who provided specimens. If a study reported participants' non-COVID-19 symptoms or reported symptoms before the start of SARS-CoV-2 epidemic in their country, corresponding symptomatic or asymptomatic serological results would not be included in analysis.

### *Rationale for correcting seroprevalence estimates by using Bayesian measurement error models*

In our main analysis we did not correct for imperfect serological test performance. We conducted a sensitivity analysis to explore the impact of sensitivity and specificity of serological assays on our pooled estimates of seroprevalence.

We obtained the adjusted number of seropositive individuals through multiplying the adjusted seroprevalence by the number of participants tested for each study. If an original study reported the test-performance-adjusted seroprevalence, we used the reported one. If an original study didn't report the adjusted seroprevalence, we extracted the data of sensitivity and specificity for different serological assays based on the following principles in order of preference: 1) independent internal evaluation conducted by serosurvey investigators themselves; 2) external evaluation from official regulators (e.g., FDA); 3) published paper of evaluating test performance; 4) manufacturer-reported data. Specifically, we assumed that the sensitivity and specificity of neutralization assays were 100%. If a study used a second assay to confirm the results of the first assay, we calculated the combined sensitivity and specificity with the following formula:

$$\text{Combined specificity} = \text{Specificity of test A} + \text{Specificity of test B} - (\text{Specificity of test A} * \text{Specificity of test B});$$

$$\text{Combined sensitivity} = \text{Sensitivity of test A} * \text{Sensitivity of test B},$$

where test A and test B represented the first and the second serological assay, respectively.

Briefly, we used a Bayesian framework to calculate adjusted seroprevalence with following specifications:<sup>45</sup>

$$y \sim \text{Binomial}(n, p)$$

$$p = (1 - \gamma)(1 - \pi) + \delta\pi$$

$$y\gamma \sim \text{Binomial}(n\gamma, \gamma)$$

$$y\delta \sim \text{Binomial}(n\delta, \delta)$$

where  $p$  represents the expected frequency of positive test,  $\pi$  represents prevalence,  $\gamma$  and  $\delta$  represent the specificity and sensitivity respectively. For each study, we used the sensitivity and specificity values and corresponding denominators to fit the specified model. We set 4 chains with 2000 iterations (1000 warmup), and we implemented 5 diagnostic criterions to ensure the wellness of fit, including 1) no chains ending with a divergence; 2) no iterations saturating the max tree depth of 10; 3) the E-BFMI (effective Bayesian fraction of missing information) over 0.2 for all chains; 4) all  $\hat{R}$  between 0.9 and 1.0; 5) the effective sample size being larger than 0.001 times the number of iterations.<sup>6,7</sup> All 5 criterions must be achieved at the same time, or the model will be rerun. At last, we will get adjusted seroprevalence and according credible interval.

## Supplementary Tables

**Table S1. Search strategy for three peer-reviewed databases and five preprint servers**

| Database       | Step | Searching strategy                                                                                                                                                      | Number of articles* |
|----------------|------|-------------------------------------------------------------------------------------------------------------------------------------------------------------------------|---------------------|
| PubMed         |      | 2019-nCoV OR “coronavirus disease 2019” OR COVID-19 OR                                                                                                                  | 80,422              |
|                | #1   | “severe acute respiratory syndrome coronavirus 2” OR SARS-CoV-2                                                                                                         |                     |
|                |      | seroprevalen* OR seroincidenc* OR seroconversion OR                                                                                                                     | 986,898             |
|                | #2   | seronegative OR seropositive* OR seroepidemiolog* OR serolog* OR serosurvey* OR antibod* OR (infection* AND (“attack rate” OR “cumulative incidence”))                  |                     |
|                | #3   | 2019/12/01-2020/12/22                                                                                                                                                   | 1,673,686           |
|                | #4   | Language: English                                                                                                                                                       | 27,180,252          |
|                | #5   | #1 AND #2 AND #3 AND #4                                                                                                                                                 | 3,685               |
| Web of Science |      | TS = (2019-nCoV OR “coronavirus disease 2019” OR COVID-19 OR                                                                                                            | 66,366              |
|                | #1   | “severe acute respiratory syndrome coronavirus 2” OR SARS-CoV-2)                                                                                                        |                     |
|                |      | TS= (seroprevalen* OR seroincidenc* OR seroconversion OR                                                                                                                | 1,061,760           |
|                | #2   | seronegative OR seropositive OR seropositivity OR seroepidemiolog* OR serolog* OR serosurvey* OR antibod* OR (infection* AND (“attack rate” OR “cumulative incidence”)) |                     |
|                | #3   | 2019/01/01-2020/12/22                                                                                                                                                   | -                   |
|                | #4   | Language: English                                                                                                                                                       | -                   |
|                | #5   | #1 AND #2 AND #3 AND #4                                                                                                                                                 | 2,684               |
| Embase         |      | 2019-nCoV OR “coronavirus disease 2019” OR COVID-19 OR                                                                                                                  | 77,287              |
|                | #1   | “severe acute respiratory syndrome coronavirus 2” OR SARS-CoV-2                                                                                                         |                     |

|               |    |                                                                                                                                                              |           |
|---------------|----|--------------------------------------------------------------------------------------------------------------------------------------------------------------|-----------|
|               |    | seroprevalen* OR seroincidenc* OR seroconversion OR                                                                                                          | 1,266,619 |
|               | #2 | seronegative OR seropositive* OR seroepidemiolog* OR serolog*<br>OR serosurvey* OR antibod* OR (infection* AND (“attack rate” OR<br>“cumulative incidence”)) |           |
|               | #3 | 2019/12/01-2020/12/22                                                                                                                                        | -         |
|               | #4 | Language: English                                                                                                                                            | -         |
|               | #5 | #1 AND #2 AND #3 AND #4                                                                                                                                      | 2,549     |
|               | #1 | COVID-19 OR SARS-CoV-2                                                                                                                                       | 12,963    |
| medRxiv &     | #2 | sero* OR antibod*                                                                                                                                            | 43,244    |
| bioRxiv       | #3 | 2019/12/01-2020/12/22                                                                                                                                        | 57,944    |
|               | #4 | #1 AND #2 AND #3                                                                                                                                             | 4,995     |
| SSRN*         | #1 | COVID-19 AND antibody, COVID-19 AND seroprevalence                                                                                                           | 147       |
| Wellcome*     | #1 | COVID-19                                                                                                                                                     | 60        |
|               |    | 2019-nCoV OR “coronavirus disease 2019” OR COVID-19 OR                                                                                                       | 91,906    |
|               | #1 | “severe acute respiratory syndrome coronavirus 2” OR SARS-CoV-<br>2                                                                                          |           |
|               |    | seroprevalen* OR seroincidenc* OR seroconversion OR                                                                                                          | 998,149   |
| Europe<br>PMC | #2 | seronegative OR seropositive* OR seroepidemiolog* OR serolog*<br>OR serosurvey* OR antibod* OR (infection* AND (“attack rate” OR<br>“cumulative incidence”)) |           |
|               | #3 | Type: Preprints                                                                                                                                              | 218,252   |
|               | #4 | 2019/12/01-2020/12/22                                                                                                                                        | 1,671,278 |
|               | #5 | #1 AND #2 AND #3 AND #4                                                                                                                                      | 2,361     |

\*Databases do not permit Boolean operator OR, extensive search was done for SSRN and Wellcome.



**Table S2. Descriptive characteristics of serological studies included in the systematic review**

| Reference              | Location (country) | Study period (starting timepoint) | Study type                                                                                                  | Study population                                                                               | No. of participants                                                                                                                 | Age of participants (Median, range/mean±SD)                                                                                                                                   | Exposures                                                                                                                                                                                                                                                                                                                                                                                                                                                                                                                                                           | Symptom assessment                                               | Serology collected (No. of single serum/paired sera/participants)                                 | Comment                                                                                                                                                                                                                                                                                                |
|------------------------|--------------------|-----------------------------------|-------------------------------------------------------------------------------------------------------------|------------------------------------------------------------------------------------------------|-------------------------------------------------------------------------------------------------------------------------------------|-------------------------------------------------------------------------------------------------------------------------------------------------------------------------------|---------------------------------------------------------------------------------------------------------------------------------------------------------------------------------------------------------------------------------------------------------------------------------------------------------------------------------------------------------------------------------------------------------------------------------------------------------------------------------------------------------------------------------------------------------------------|------------------------------------------------------------------|---------------------------------------------------------------------------------------------------|--------------------------------------------------------------------------------------------------------------------------------------------------------------------------------------------------------------------------------------------------------------------------------------------------------|
| Peer-reviewed database |                    |                                   |                                                                                                             |                                                                                                |                                                                                                                                     |                                                                                                                                                                               |                                                                                                                                                                                                                                                                                                                                                                                                                                                                                                                                                                     |                                                                  |                                                                                                   |                                                                                                                                                                                                                                                                                                        |
| Victoria et al., 2020  | Washington, USA    | Jan 2020                          | Longitudinal study                                                                                          | Office co-workers, waiting room contacts, healthcare contacts                                  | 11 office co-workers<br>20 waiting room contacts, and<br>7 healthcare workers                                                       | Office co-workers: 39 (24-62) years old;<br>Waiting room contacts: 53.5 (<1-78) years old;<br>Healthcare contacts: 36 (30-56) years old;<br>All contacts: 45 (0-78) years old | Office co-workers: being an office co-worker of the case-patient with close contact of any duration;<br>Waiting room contacts: sharing a healthcare waiting room or area during the same time and up to 2 hours after the case-patient was present;<br>Healthcare contacts: any face-to-face interaction between healthcare personnel and the case-patient without wearing the full personal protective equipment (i.e., gown, gloves, eye protection, and N95 respirator) or potential contact with the case-patients' secretions by HCP without wearing full PPE. | Yes                                                              | Yes (Office co-workers: unk/9/11; waiting room contacts:4/10/20; healthcare contacts:2/4/7)       | All 8 HCP had interactions with the case-patient without wearing the full recommended PPE (only partial PPE were used); One public health employee who briefly visited the case-patient's home and had a face-to-face conversation without wearing PPE, and this HCP was not included in the analysis. |
| To et al., 2020        | Hongkong, China    | Jan 2020                          | Cross-sectional study for general population;<br>Longitudinal study for Hong residents evacuated from Hubei | General population; Hongkong residents evacuated from Hubei                                    | 1938 general population (specimens collected from clinical biochemistry laboratory);<br>469 Hongkong residents evacuated from Hubei | General population: 0-80 years old;<br>Hongkong residents evacuated from Hubei: 41 years old                                                                                  | Poorly-defined exposures for both populations                                                                                                                                                                                                                                                                                                                                                                                                                                                                                                                       | Symptom of Hongkong residents evacuated from Hubei was assessed. | Yes (General population: 580/0/580, 233/0/233; Hongkong residents evacuated from Hubei:452/0/469) | Here only showed the result from the specimens collected after Dec 2019; 452 Hongkong residents evacuated from Hubei provided at least one blood sample                                                                                                                                                |
| Hippich et al., 2020   | Bavaria, Germany   | Jan 2020                          | Longitudinal study                                                                                          | Children participating in a diabetes screening program; Neonates in a Bavarian screening study | 11884 children<br>1916 neonates                                                                                                     | Children: median (IQR): 3.2 (2.2-5.1) years old;<br>Neonates: median (IQR): 2 (0-2) years old                                                                                 | -                                                                                                                                                                                                                                                                                                                                                                                                                                                                                                                                                                   | Yes                                                              | Yes (Children: 11867/17/11884; Neonates: 1916/0/1916)                                             | -                                                                                                                                                                                                                                                                                                      |

| Reference              | Location (country)                        | Study period (starting timepoint) | Study type            | Study population                                        | No. of participants          | Age of participants (Median, range/mean±SD)                    | Exposures                                                                                                                                                                                                                              | Symptom assessment                                                                                                                                                                                                       | Serology collected (No. of single serum/paired sera/participants) | Comment |
|------------------------|-------------------------------------------|-----------------------------------|-----------------------|---------------------------------------------------------|------------------------------|----------------------------------------------------------------|----------------------------------------------------------------------------------------------------------------------------------------------------------------------------------------------------------------------------------------|--------------------------------------------------------------------------------------------------------------------------------------------------------------------------------------------------------------------------|-------------------------------------------------------------------|---------|
| Liang et al., 2020     | Guangdong, China; Wuhan, Hubei, China     | Jan 2020                          | Cross-sectional study | Inpatients and their healthy companions                 | Guangzhou: 8782; Wuhan: 8272 | Guangzhou: 54 (44-62) years old<br>Wuhan: 55 (38-67) years old | Poorly-defined exposures                                                                                                                                                                                                               | Yes (The seropositive individuals had no history of COVID-19 symptoms, and therefore regarded as asymptomatic or mild)                                                                                                   | Yes (Guangzhou: 8782/0/8782; Wuhan: 8272/0/8272)                  | -       |
| Ng et al., 2020        | Singapore                                 | Jan 2020                          | Cross-sectional study | close contact                                           | 1150                         | Median (IQR): 35 (26 - 51) years old                           | -                                                                                                                                                                                                                                      | Yes                                                                                                                                                                                                                      | Yes (1150/0/1150)                                                 | -       |
| Hallowell et al., 2020 | USA                                       | Feb 2020                          | Cross-sectional study | Evacuees from Wuhan in a repatriation                   | 193                          | 42 (0-74) years old                                            | Among participants with serological results: 1 person had close contact with laboratory-confirmed COVID-19 case-patient in past 2 months; 30 had close contact with person with fever and/or acute respiratory illness in past 2 month | Yes (9/193 of evacuees reported having experienced signs or symptoms associated with COVID-19 in the previous 2 weeks, and 24/193 of evacuees reported signs/symptoms associated with COVID-19 in the previous 2 months) | Yes (186/0/193)                                                   | -       |
| Sam et al., 2020       | Kuala Lumpur and Selangor state, Malaysia | Jan 2020                          | Cross-sectional study | Residual serum samples collected at a teaching hospital | 588                          | All ages                                                       | Residual serum with poorly-defined exposures                                                                                                                                                                                           | No                                                                                                                                                                                                                       | Yes (588/0/588)                                                   | -       |

| Reference          | Location (country)           | Study period (starting timepoint) | Study type            | Study population        | No. of participants                                                                                                                                                                                                                                                                                                                                                                                                                                                                                                                                                                                                                           | Age of participants (Median, range/mean±SD) | Exposures | Symptom assessment | Serology collected (No. of single serum/paired sera/participants)                                                                                                                                                                                                                                                                                                                                                                                                                                                                                                                                                                                                                  | Comment |
|--------------------|------------------------------|-----------------------------------|-----------------------|-------------------------|-----------------------------------------------------------------------------------------------------------------------------------------------------------------------------------------------------------------------------------------------------------------------------------------------------------------------------------------------------------------------------------------------------------------------------------------------------------------------------------------------------------------------------------------------------------------------------------------------------------------------------------------------|---------------------------------------------|-----------|--------------------|------------------------------------------------------------------------------------------------------------------------------------------------------------------------------------------------------------------------------------------------------------------------------------------------------------------------------------------------------------------------------------------------------------------------------------------------------------------------------------------------------------------------------------------------------------------------------------------------------------------------------------------------------------------------------------|---------|
| Jeong et al., 2020 | New York, USA                | Feb 2020                          | Cross-sectional study | Emergency professionals | 50                                                                                                                                                                                                                                                                                                                                                                                                                                                                                                                                                                                                                                            | Median (IQR): 35 (31-49) years old          |           | No                 | Yes (50/0/50)                                                                                                                                                                                                                                                                                                                                                                                                                                                                                                                                                                                                                                                                      |         |
| Buss et al., 2020  | Manaus and São Paulo, Brazil | Feb 2020;                         | Cross-sectional study | Blood donors            | Feb:<br>Manaus blood donors: 821;<br>São Paulo blood donors: 799.<br>Mar:<br>Manaus blood donors: 832;<br>São Paulo blood donors: 2454.<br>Apr:<br>Manaus blood donors: 829;<br>São Paulo blood donors: 900.<br>May:<br>Manaus blood donors: 901;<br>São Paulo blood donors: 826.<br>June:<br>Manaus blood donors: 911;<br>São Paulo blood donors: 880.<br>July:<br>Manaus blood donors: 1147;<br>São Paulo blood donors: 879.<br>Aug:<br>Manaus blood donors: 881;<br>São Paulo blood donors: 906.<br>Sep:<br>Manaus blood donors: 868;<br>São Paulo blood donors: 933.<br>Oct:<br>Manaus blood donors: 882;<br>São Paulo blood donors: 877. |                                             |           | No                 | Yes (Feb: Manaus blood donors: 821/0/821; São Paulo blood donors: 799/0/799. Mar: Manaus blood donors: 832/0/832; São Paulo blood donors: 2454/0/2454. Apr: Manaus blood donors: 829/0/829; São Paulo blood donors: 900/0/900. May: Manaus blood donors: 901/0/901; São Paulo blood donors: 826/0/826. June: Manaus blood donors: 911/0/911; São Paulo blood donors: 880/0/880. July: Manaus blood donors: 1147/0/1147; São Paulo blood donors: 879/0/879. Aug: Manaus blood donors: 881/0/881; São Paulo blood donors: 906/0/906. Sep: Manaus blood donors: 868/0/868; São Paulo blood donors: 933/0/933. Oct: Manaus blood donors: 882/0/882; São Paulo blood donors: 877/0/877) |         |

| Reference                 | Location (country)  | Study period (starting timepoint) | Study type            | Study population                                                                                              | No. of participants                                                     | Age of participants (Median, range/mean±SD) | Exposures                                                                                                                                                                                                                                                                                                                                    | Symptom assessment                                                                                   | Serology collected (No. of single serum/paired sera/participants)                                                                        | Comment                                                                                                                                                 |
|---------------------------|---------------------|-----------------------------------|-----------------------|---------------------------------------------------------------------------------------------------------------|-------------------------------------------------------------------------|---------------------------------------------|----------------------------------------------------------------------------------------------------------------------------------------------------------------------------------------------------------------------------------------------------------------------------------------------------------------------------------------------|------------------------------------------------------------------------------------------------------|------------------------------------------------------------------------------------------------------------------------------------------|---------------------------------------------------------------------------------------------------------------------------------------------------------|
| Stadlbauer et al., 2020   | New York City, USA  | Feb 2020                          | Cross-sectional study | Patients with emergency department visit (urgent care group); Patients with OB/GYN visit (routine care group) | 4101 patients in urgent care group; 6590 patients in routine care group | All ages                                    | -                                                                                                                                                                                                                                                                                                                                            | No                                                                                                   | Yes (patients in urgent care group: 4101/0/4101; patients in routine care group 6590/0/6590)                                             | -                                                                                                                                                       |
| Chen et al., 2020         | Nanjing, China      | Feb 2020                          | Cross-sectional study | Healthcare worker                                                                                             | 105                                                                     | 30.0 (26.0-39.5) years old                  | Direct contact with four COVID-19 patients                                                                                                                                                                                                                                                                                                   | Yes (12/105 of participants reported general symptoms, including fever, headache, sore throat, etc.) | Yes (105/0/105)                                                                                                                          | 78/105 of healthcare workers used disposable non-surgical face mask, which generally lacks the capability of filtering particles, viruses and bacteria. |
| Liu et al., 2020          | Connecticut, USA    | Feb 2020                          | cross-sectional study | Newborn                                                                                                       | 3048                                                                    | -                                           | -                                                                                                                                                                                                                                                                                                                                            | No                                                                                                   | Yes (3048/0/3048)                                                                                                                        | -                                                                                                                                                       |
| Cavicchiolo et al., 2020  | Veneto, Italy       | Feb 2020                          | Cross-sectional study | Neonates                                                                                                      | 75                                                                      | -                                           | -                                                                                                                                                                                                                                                                                                                                            | No                                                                                                   | Yes (75/0/75)                                                                                                                            | Only neonates at risk of SARS-CoV-2 infection with a positive maternal history were tested at birth and at 14 days of life.                             |
| Plebani et al., 2020      | Padova, Italy       | Feb 2020                          | Cross-sectional study | Healthcare workers                                                                                            | 8285                                                                    | 43.2±11.6 years old                         | -                                                                                                                                                                                                                                                                                                                                            | No                                                                                                   | Yes (8285/0/8285)                                                                                                                        | -                                                                                                                                                       |
| Cox et al., 2020          | Bergen, Norway      | Feb 2020                          | Cross-sectional study | Household members of confirmed COVID-19 cases                                                                 | 77                                                                      | -                                           | Household contact                                                                                                                                                                                                                                                                                                                            | No                                                                                                   | Yes (77/0/77)                                                                                                                            | -                                                                                                                                                       |
| Villalain et al., 2020    | Madrid, Spain       | Feb 2020                          | Cross-sectional study | pregnant woman                                                                                                | 769                                                                     | -                                           | -                                                                                                                                                                                                                                                                                                                                            | Yes                                                                                                  | Yes (769/0/769)                                                                                                                          | -                                                                                                                                                       |
| Brandstetter et al., 2020 | Regensburg, Germany | Mar 2020                          | Cross-sectional study | Hospital staff                                                                                                | 180 hospital staff with different levels of exposures                   | 18-65 years old                             | Close contact: unprotected contact with a distance of less than 2 meters for 15 minutes or longer;<br>Moderate contact: contact with a distance of less than 2 meters while using personal protective equipment or unprotected contact with a distance of more than 2 meters;<br>No contact: not aware of any contact to a COVID-19 patient. | Yes                                                                                                  | Yes (Hospital staff with close contact: 50/0/50; Hospital staff with moderate contact: 63/0/63; Hospital staff with no contact: 57/0/57) | -                                                                                                                                                       |

| Reference                 | Location (country)           | Study period (starting timepoint) | Study type            | Study population                                                             | No. of participants                                                                        | Age of participants (Median, range/mean±SD) | Exposures                                           | Symptom assessment                            | Serology collected (No. of single serum/paired sera/participants)                                          | Comment                                                                   |
|---------------------------|------------------------------|-----------------------------------|-----------------------|------------------------------------------------------------------------------|--------------------------------------------------------------------------------------------|---------------------------------------------|-----------------------------------------------------|-----------------------------------------------|------------------------------------------------------------------------------------------------------------|---------------------------------------------------------------------------|
| Solodky et al., 2020      | Lyon, France                 | Mar 2020                          | Cross-sectional study | Healthcare worker; cancer patients                                           | 244<br>85                                                                                  | -                                           | Poorly-defined exposures                            | Healthcare worker: Yes<br>Cancer patients: No | Yes (healthcare worker: 244/0/244; cancer patients: 85/0/85)                                               | All healthcare workers used adequate PPE (consult correspondence author). |
| Zhang et al., 2020        | Guangdong, China             | Mar 2020                          | Cross-sectional study | Healthy individuals returning to Shenzhen                                    | 1589                                                                                       | 36.4 (11–89) years old                      | -                                                   | Yes (All were asymptomatic)                   | Yes (1589/0/1589)                                                                                          | 1589 individuals without clinical symptoms (cough, fever, and fatigue)    |
| Suda et al., 2020         | Japan                        | Mar 2020                          | Cross-sectional study | Outpatients with liver disease                                               | 700                                                                                        | 20-84 years old                             | Poorly-defined exposure                             | Yes (All were asymptomatic)                   | Yes (700/0/700)                                                                                            | -                                                                         |
| Bogiannidou et al., 2020  | Greece                       | Mar 2020                          | Cross-sectional study | Leftover blood samples from nationwide labs                                  | 6586                                                                                       | All ages                                    | Poorly-defined exposure with residual blood samples | No                                            | Yes (6586/0/6586)                                                                                          | -                                                                         |
| Xu et al., 2020           | Hubei, Guangdong, China      | Mar 2020                          | Cross-sectional study | Hemodialysis Patients; Healthcare worker                                     | Hemodialysis Patients: 1542<br>Healthcare worker: 3205                                     | -                                           | -                                                   | Yes                                           | Yes (Hemodialysis Patients: 1542/0/1542, healthcare worker: 3205/0/3205)                                   | -                                                                         |
| Vena et al., 2020         | Liguria and Lombardia, Italy | Mar 2020                          | Cross-sectional study | non-hospitalized participants in an outpatient setting.                      | 3609                                                                                       | Median (IQR): 51 (41–63) years old          | -                                                   | Yes                                           | Yes (3609/0/3609)                                                                                          | -                                                                         |
| Ng et al., 2020           | San Francisco Bay Area, USA  | Mar 2020                          | Cross-sectional study | Blood donors; Hospitalized patients admitted for non-respiratory indications | Blood donors: 1000;<br>Hospitalized patients admitted for non-respiratory indications: 387 | -                                           | -                                                   | Yes                                           | Yes (Blood donors: 1000/0/1000, Hospitalized patients admitted for non-respiratory indications: 387/0/387) | -                                                                         |
| Venugopal et al., 2020    | New York, USA                | Mar 2020                          | cross-sectional study | Healthcare workers                                                           | 478                                                                                        | Older than 20 years old                     | -                                                   | Yes                                           | Yes (478/0/478)                                                                                            | -                                                                         |
| Dingens et al., 2020      | Seattle, USA                 | Mar 2020                          | Cross-sectional study | Residual serum samples from Seattle Children’s Hospital                      | 1076                                                                                       | -                                           | -                                                   | Yes                                           | Yes (1076/0/1076)                                                                                          | -                                                                         |
| Barzin et al., 2020       | North Carolina, USA          | Mar 2020                          | Cross-sectional study | Patients in outpatient clinics; Inpatients unrelated to COVID-19             | Patients in outpatient clinics: 2937;<br>Inpatients unrelated to COVID-19: 1449            | Older than 20 years old                     | -                                                   | Yes                                           | Yes (Patients in outpatient clinics: 2937/0/2937; Inpatients unrelated to COVID-19: 1449/0/1449)           | -                                                                         |
| Pérez-García et al., 2020 | Madrid, Spain                | Mar 2020                          | Cross-sectional study | Healthcare worker                                                            | 2963                                                                                       | -                                           | -                                                   | Yes                                           | Yes (2424/0/2963)                                                                                          | -                                                                         |
| Trieu et al., 2020        | Norway                       | Mar 2020                          | Longitudinal study    | Healthcare workers                                                           | 607                                                                                        | Median (IQR): 39 (20 – 78) years old        | -                                                   | Yes                                           | Yes (Baseline: 0/607/607)                                                                                  | -                                                                         |

| Reference               | Location (country)                                  | Study period (starting timepoint) | Study type            | Study population                                      | No. of participants                                                  | Age of participants (Median, range/mean±SD)                                      | Exposures                                                                                                                                 | Symptom assessment          | Serology collected (No. of single serum/paired sera/participants) | Comment                                                           |
|-------------------------|-----------------------------------------------------|-----------------------------------|-----------------------|-------------------------------------------------------|----------------------------------------------------------------------|----------------------------------------------------------------------------------|-------------------------------------------------------------------------------------------------------------------------------------------|-----------------------------|-------------------------------------------------------------------|-------------------------------------------------------------------|
| Fischer et al., 2020    | North Rhine-Westphalia, Lower-Saxony, Hesse, German | Mar 2020                          | Cross-sectional study | Blood donors                                          | 3186                                                                 | 18-65 years old                                                                  | -                                                                                                                                         | Yes                         | Yes (3186/0/3186)                                                 | -                                                                 |
| McCafferty et al., 2020 | North East London, UK                               | Mar 2020                          | cross-sectional study | Patients in an urban hemodialysis unit                | 1046                                                                 | -                                                                                | -                                                                                                                                         | No                          | Yes (811/0/1046)                                                  | -                                                                 |
| Brown et al., 2020      | USA                                                 | Mar 2020                          | Cross-sectional study | Student who contacted with infected teacher           | 21                                                                   | 17 (5-18) years old                                                              | Interactive classroom contact (mean in-class time was 108 minutes); noninteractive classroom contact (mean in-class time was 50 minutes). | Yes                         | Yes (21/0/21)                                                     | -                                                                 |
| Han et al., 2020        | Wuhan, Hubei, China                                 | Mar 2020                          | Cross-sectional study | Persons during work resumption screening              | 22633                                                                | -                                                                                | -                                                                                                                                         | Yes (All were asymptomatic) | Yes (22633/0/22633)                                               | -                                                                 |
| Zhou et al., 2020       | Wuhan, Hubei, China                                 | Mar 2020                          | Cross-sectional study | Hospital staff                                        | 3674                                                                 | Older than 18 years old                                                          | -                                                                                                                                         | Yes                         | Yes (3674/0/3674)                                                 | -                                                                 |
| Thompson et al., 2020   | Scottish, UK                                        | Mar 2020                          | Cross-sectional study | Blood donors                                          | 3500                                                                 | Median (IQR): 47 (34-56) years old                                               | -                                                                                                                                         | No                          | Yes (3500/0/3500)                                                 | -                                                                 |
| Carlo et al., 2020      | Foggia, Italy                                       | Mar 2020                          | Longitudinal study    | High-risk HCWs; Intermediate-risk HCWs; Low-risk HCWs | High-risk HCWs: 428; Intermediate-risk HCWs: 2736; Low-risk HCWs: 78 | High-risk HCWs: 51.3±9.1 years old; Intermediate-risk HCWs: 46.7±11.6 years old; | -                                                                                                                                         | Yes                         | Yes (3209/33/3242)                                                | -                                                                 |
| Tu et al., 2020         | Wuhan, Hubei, China                                 | Mar 2020                          | Cohort study          | Pediatric medical workers                             | 325                                                                  | -                                                                                | Contact with confirmed and/or suspected cases of COVID-19                                                                                 | No                          | Yes (325/0/325)                                                   | -                                                                 |
| Kohler et al., 2020     | St Gallen, Switzerland                              | Mar 2020                          | Cohort study          | Hospital workers                                      | 1012                                                                 | 38.3 (16.9-64.8) years old                                                       | HCW caring for known COVID-19 cases                                                                                                       | Yes                         | Yes (1012/0/1012)                                                 | -                                                                 |
| Fuereeder et al., 2020  | Vienna, Austria                                     | Mar 2020                          | Cross-sectional study | Healthcare professionals; cancer patients             | Healthcare professionals: 62; cancer patients: 84                    | 41 (23-59) years old; median: 61 years old                                       | -                                                                                                                                         | Yes                         | Yes (Healthcare professionals: 62/0/62, cancer patients: 84/0/84) | -                                                                 |
| Fusco et al., 2020      | Naples, Italy                                       | Mar 2020                          | Cross-sectional study | Healthcare worker                                     | 120                                                                  | Median (IQR): 43 (32-51.5) years old                                             | Direct contact with patient or patients' environment                                                                                      | Yes                         | Yes (0/115/120)                                                   | 102 (89%) HCWs participate to training event about PPE procedures |

| Reference              | Location (country) | Study period (starting timepoint) | Study type            | Study population                                                                              | No. of participants                                                                                                                                                                                         | Age of participants (Median, range/mean±SD)                                                                                                         | Exposures                                                                                                                                                                                     | Symptom assessment                                                                    | Serology collected (No. of single serum/paired sera/participants)                                                                                                                                                                                                                                                                 | Comment                                                                                     |
|------------------------|--------------------|-----------------------------------|-----------------------|-----------------------------------------------------------------------------------------------|-------------------------------------------------------------------------------------------------------------------------------------------------------------------------------------------------------------|-----------------------------------------------------------------------------------------------------------------------------------------------------|-----------------------------------------------------------------------------------------------------------------------------------------------------------------------------------------------|---------------------------------------------------------------------------------------|-----------------------------------------------------------------------------------------------------------------------------------------------------------------------------------------------------------------------------------------------------------------------------------------------------------------------------------|---------------------------------------------------------------------------------------------|
| Havers et al., 2020    | USA                | Mar 2020                          | Cross-sectional study | Residual patient sera collected for routine screening                                         | 3264 (Washington)<br>2482 (New York City)<br>1184 (Louisiana)<br>1742 (South Florida)<br>824 (Pennsylvania)<br>1882 (Missouri)<br>1132 (Utah)<br>1224 (California)<br>1431 (Connecticut)<br>860 (Minnesota) | All ages                                                                                                                                            | -                                                                                                                                                                                             | No                                                                                    | Washington: Yes (3264/0/3264)<br>New York City: Yes (2482/0/2482)<br>Louisiana: Yes (1184/0/1184)<br>South Florida: Yes (1742/0/1742)<br>Pennsylvania: Yes (824/0/824)<br>Missouri: Yes (1882/0/1882)<br>Utah: Yes (1132/0/1132)<br>California: Yes (1224/0/1224)<br>Connecticut: Yes (1431/0/1431)<br>Minnesota: Yes (860/0/860) | Crude estimates were not obtained from the study.                                           |
| Xu et al., 2020        | Guangdong, China   | Mar 2020                          | Cross-sectional study | Blood donors                                                                                  | 2199                                                                                                                                                                                                        | 34 (18-59) years old                                                                                                                                | -                                                                                                                                                                                             | No                                                                                    | Yes (2199/0/2199)                                                                                                                                                                                                                                                                                                                 | -                                                                                           |
| Behrens et al., 2020   | Hannover, Germany  | Mar 2020                          | Longitudinal study    | First line health care professional                                                           | 217                                                                                                                                                                                                         | Mean (range): 36.5 (18-63) years old                                                                                                                | Direct contact with a confirmed SARS-CoV-2 infected person                                                                                                                                    | Yes                                                                                   | Yes (217/0/217)                                                                                                                                                                                                                                                                                                                   | Rigorous use of PPE                                                                         |
| Loconsole et al., 2020 | Bari, Italy        | Mar 2020                          | Cross-sectional study | Patients admitted to Emergency Department                                                     | 819                                                                                                                                                                                                         | Median (IQR): 66 (52-80) years old                                                                                                                  | -                                                                                                                                                                                             | Yes                                                                                   | Yes (819/0/819)                                                                                                                                                                                                                                                                                                                   | -                                                                                           |
| Mansour et al., 2020   | New York, USA      | Mar 2020                          | Cross-sectional study | Healthcare worker                                                                             | 285                                                                                                                                                                                                         | 18-84 years old                                                                                                                                     | Exposure to aerosolized SARS-CoV-2 or direct patient exposure (emergency medicine, critical care, anesthesiology; direct contact with patients)                                               | Yes                                                                                   | Yes (285/0/285)                                                                                                                                                                                                                                                                                                                   | Standard protective precautions per CDC guidelines for all HCW were continuously recommend. |
| Gallian et al., 2020   | France             | Mar 2020                          | Cross-sectional study | Blood donors                                                                                  | 998                                                                                                                                                                                                         | Median: 41 years old                                                                                                                                | Poorly-defined exposure                                                                                                                                                                       | Yes (no history of fever or symptom of respiratory infection in the previous 2 weeks) | Yes (998/0/998)                                                                                                                                                                                                                                                                                                                   | -                                                                                           |
| Korth et al., 2020     | Essen, Germany     | Mar 2020                          | Cross-sectional study | High-risk healthcare worker; intermediated-risk healthcare worker; low-risk healthcare worker | 244 high-risk healthcare workers; 37 intermediated-risk healthcare workers and 35 low-risk healthcare workers                                                                                               | High-risk healthcare worker: 36.7±10.7 years old<br>intermediated-risk healthcare worker: unknown<br>low-risk healthcare worker: 42.3±3.2 years old | High-risk healthcare: daily COVID-19 patient contact; intermediated-risk healthcare worker: daily non-COVID-19 patient contact;<br>low-risk healthcare worker: without daily patient contact; | Yes                                                                                   | Yes (high-risk healthcare worker: 244/0/244; intermediated-risk healthcare worker: 37/0/37; low-risk healthcare worker: 35/0/35)                                                                                                                                                                                                  | -                                                                                           |

| Reference              | Location (country) | Study period (starting timepoint) | Study type            | Study population                                                                                       | No. of participants                                                                                              | Age of participants (Median, range/mean±SD)                     | Exposures                                                                               | Symptom assessment | Serology collected (No. of single serum/paired sera/participants)                                                                 | Comment                                                       |
|------------------------|--------------------|-----------------------------------|-----------------------|--------------------------------------------------------------------------------------------------------|------------------------------------------------------------------------------------------------------------------|-----------------------------------------------------------------|-----------------------------------------------------------------------------------------|--------------------|-----------------------------------------------------------------------------------------------------------------------------------|---------------------------------------------------------------|
| Bielecki et al., 2020  | Switzerland        | Mar 2020                          | Cross-sectional study | Two soldier cohorts at a Swiss Army Base                                                               | Company 1: 154<br>Company 2 and 3: 354                                                                           | Company 1: 20.4 (18-27) years old<br>Company 2: 18-28 years old | Company 1: without any COVID-19 cases;<br>Company 2 and 3: heavily affected by COVID-19 | Yes                | Yes (Company 1: 88/0/154;<br>Company 2 and 3: 181/0/354)                                                                          | -                                                             |
| Tsaneva et al., 2020   | Varna, Bulgaria    | Mar 2020                          | Cross-sectional study | Outpatients                                                                                            | 586                                                                                                              | 3-92 years old                                                  | Poorly-defined exposure                                                                 | Yes                | Yes (584/2/586)                                                                                                                   | -                                                             |
| Houlihan et al., 2020  | London, UK         | Mar 2020                          | Longitudinal study    | First-line healthcare worker                                                                           | 200                                                                                                              | Median (IQR): 34 (29-44) years old                              | Contact with COVID-19 patients                                                          | Yes                | Yes (200/181/200)                                                                                                                 | UK authorities altered to mandate PPE for all patient contact |
| Liu et al., 2020       | Hubei, China       | Mar 2020                          | cross-sectional study | community residents and employees                                                                      | 35040                                                                                                            | 36 (30-45) years old                                            | -                                                                                       | No                 | Yes (35040/0/35040)                                                                                                               | -                                                             |
| Basteiro et al., 2020  | Barcelona, Spain   | Mar 2020                          | Cross-sectional study | Health care workers                                                                                    | 578                                                                                                              | 43.8±11.1 years old                                             | -                                                                                       | Yes                | Yes (0/578/578)                                                                                                                   | Highly available use of PPE for their healthcare workers.     |
| Isherwood et al., 2020 | UK                 | Mar 2020                          | Cross-sectional study | Patients in a tertiary acute general surgical unit;<br>Healthcare staff in the same healthcare setting | Patients in a tertiary acute general surgical unit: 1964<br>Healthcare staff in the same healthcare setting: 215 | Healthcare staff: 20-69 years old                               | -                                                                                       | No                 | Yes (Patients in a tertiary acute general surgical unit: 1964/0/1964, Healthcare staff in the same healthcare setting: 215/0/215) | Early implementation of PPE for healthcare staff              |



| Reference           | Location (country)                          | Study period (starting timepoint) | Study type            | Study population                                                                                                                        | No. of participants                                                                                                                                                                                                                                                                                                                                                                                     | Age of participants (Median, range/mean±SD)                                                                                                                                                                                                                                                                                                                                                                                                                                                                                                                                                                | Exposures                                                            | Symptom assessment | Serology collected (No. of single serum/paired sera/participants)                                                                                                                                                                                                                                                                                                                                                                                                               | Comment |
|---------------------|---------------------------------------------|-----------------------------------|-----------------------|-----------------------------------------------------------------------------------------------------------------------------------------|---------------------------------------------------------------------------------------------------------------------------------------------------------------------------------------------------------------------------------------------------------------------------------------------------------------------------------------------------------------------------------------------------------|------------------------------------------------------------------------------------------------------------------------------------------------------------------------------------------------------------------------------------------------------------------------------------------------------------------------------------------------------------------------------------------------------------------------------------------------------------------------------------------------------------------------------------------------------------------------------------------------------------|----------------------------------------------------------------------|--------------------|---------------------------------------------------------------------------------------------------------------------------------------------------------------------------------------------------------------------------------------------------------------------------------------------------------------------------------------------------------------------------------------------------------------------------------------------------------------------------------|---------|
| Xu et al., 2020     | Hubei, Chongqing, Sichuan, Guangdong, China | Mar 2020                          | Cross-sectional study | Healthcare worker; healthcare worker relative; Hemodialysis patient; Outpatient; Hotel staff member; Community resident; Factory worker | 714 healthcare workers in Wuhan; 3091 healthcare workers in Hubei; 319 healthcare workers in Chongqing; 260 healthcare workers in Guangdong; 219 Healthcare worker relatives in Wuhan; 979 Hemodialysis patients in Hubei; 993 outpatients in Chongqing; 563 Hemodialysis patients in Guangdong; 346 Hotel staff member in Hubei; 9442 Community residents in Sichuan; 442 Factory workers in Guangdong | Healthcare worker in Wuhan: 33 (28, 39) years old; Healthcare worker in Hubei :35 (29, 47) years old; Healthcare worker in Chongqing: 33 (28, 50) years old; Healthcare worker in Guangdong: 32 (27, 40) years old; Healthcare worker relative in Wuhan: 42 (31, 56) years old; Hemodialysis patient in Hubei: 57 (48, 67) years old; Hemodialysis patient in Guangdong:59 (47, 70) years old; Outpatient in Chongqing:52 (36, 64) years old; Hotel staff member in Wuhan: 46 (37, 50) years old; Community resident in Sichuan:56 (40, 69) years old; Factory workers in Guangdong: 29 (25, 32) years old | Healthcare workers in Wuhan engaged in COVID-19 patients' management | No                 | Yes (Healthcare worker in Wuhan:714/0/714, Healthcare worker in Hubei: 3091/0/3091, Healthcare worker in Chongqing:319/0/319, Healthcare worker in Guangdong:260/0/260; Healthcare worker relative in Wuhan: 219/0/219; Hemodialysis patient in Hubei: 979/0/979; Hemodialysis patient in Guangdong: 563/0/563; Outpatient in Chongqing: 993/0/993; Hotel staff member in Wuhan: 346/0/346; Community resident in Sichuan: 9442/0/9442; Factory worker in Guangzhou: 442/0/442) | -       |
| Milani et al., 2020 | Milan, Italy                                | Mar 2020                          | Cross-sectional study | Personnel of the University of Milan                                                                                                    | 197                                                                                                                                                                                                                                                                                                                                                                                                     | -                                                                                                                                                                                                                                                                                                                                                                                                                                                                                                                                                                                                          | Poorly-defined exposure                                              | Yes                | Yes (197/0/197)                                                                                                                                                                                                                                                                                                                                                                                                                                                                 | -       |

| Reference                       | Location (country) | Study period (starting timepoint) | Study type            | Study population                                                                   | No. of participants                                             | Age of participants (Median, range/mean±SD)                                                             | Exposures                                                                                                                                                                                                                                                     | Symptom assessment | Serology collected (No. of single serum/paired sera/participants)                      | Comment                                                                                                                                                                         |
|---------------------------------|--------------------|-----------------------------------|-----------------------|------------------------------------------------------------------------------------|-----------------------------------------------------------------|---------------------------------------------------------------------------------------------------------|---------------------------------------------------------------------------------------------------------------------------------------------------------------------------------------------------------------------------------------------------------------|--------------------|----------------------------------------------------------------------------------------|---------------------------------------------------------------------------------------------------------------------------------------------------------------------------------|
| Medas et al., 2020              | Cagliari, Italy    | Mar 2020                          | Cross-sectional study | patients admitted at surgical department                                           | 86                                                              | Mean: 57.6 years old                                                                                    | -                                                                                                                                                                                                                                                             | Yes                | Yes (86/0/86)                                                                          | All personnel involved in preadmission tests used personal protective equipment (PPE), including goggles, gowns, gloves, and caps.                                              |
| Vos et al., 2020                | Netherlands        | Mar 2020                          | Cross-sectional study | General population                                                                 | 3147                                                            | 2-90 years old                                                                                          | -                                                                                                                                                                                                                                                             | Yes                | Yes (3147/0/3147)                                                                      | -                                                                                                                                                                               |
| Savirón-Cornudella et al., 2020 | Madrid, Spain      | Mar 2020                          | Cross-sectional study | Pregnant women                                                                     | 260                                                             | -                                                                                                       | -                                                                                                                                                                                                                                                             | Yes                | Yes (260/0/260)                                                                        | -                                                                                                                                                                               |
| Bryan et al., 2020              | Idaho, USA         | Apr 2020                          | Cross-sectional study | Community resident                                                                 | 4856 residents                                                  | All ages                                                                                                | -                                                                                                                                                                                                                                                             | No                 | Yes (4856/0/4856)                                                                      | -                                                                                                                                                                               |
| Hains et al., 2020              | Indianapolis, USA  | Apr 2020                          | Cohort study          | Hemodialysis patients; Healthcare worker                                           | 13 hemodialysis patients and 25 healthcare workers              | Hemodialysis patients: 13 (2-16) years old<br>Healthcare worker: 40.5 (25-61) years old                 | Potential contact with a hemodialysis patient diagnosed with COVID-19 in the unit.                                                                                                                                                                            | Yes                | Yes (Hemodialysis patients: 0/13/13; Healthcare worker: 0/25/25)                       | Patients wore surgical masks at all times, as did health care workers.                                                                                                          |
| Liu et al., 2020                | Guangdong, China   | Apr 2020                          | Cross-sectional study | Healthcare worker deployed to Wuhan, and healthcare professionals at home hospital | 116 Doctors, 304 nurses and 77 control healthcare professionals | Doctors: 42.2 years old;<br>Nurses: 33.4 years old;<br>Control healthcare professionals: 57.8 years old | Caring for patients with critical disease and operating aerosol generating procedure (AGPs),<br>Control healthcare professionals: without exposure to COVID-19 patients at home hospital                                                                      | Yes                | Yes (Doctors: 116/0/116, Nurses: 304/0/304; Control healthcare professionals: 77/0/77) | Appropriate personal protective equipment (standardized PPE, including protective suits, masks, gloves, goggles, face shields, mand gowns) for all frontline doctors and nurses |
| Malickova et al., 2020          | Czech Republic     | Apr 2020                          | Cross-sectional study | Inflammatory bowel disease healthcare professionals                                | 92                                                              | 45 (38-57) years old                                                                                    | Poorly-defined exposure                                                                                                                                                                                                                                       | Yes                | Yes (92/0/92)                                                                          | -                                                                                                                                                                               |
| Paulino-Ramirez et al., 2020    | Dominican Republic | Apr 2020                          | Cross-sectional study | Community residents in emerging hotspots                                           | 12897                                                           | Mean: 42 years old                                                                                      | -                                                                                                                                                                                                                                                             | No                 | Yes (12897/0/12897)                                                                    | -                                                                                                                                                                               |
| Chirathaworn et al., 2020       | Bangkok, Thailand  | Apr 2020                          | Cross-sectional study | Individuals who came into close contacts with the patients                         | 308                                                             | Median (IQR): 35 (26 - 48) years old                                                                    | May either be relatives of COVID-19 patients living in the same household or interacted with patients for a significant amount of time (including healthcare providers to the patients, passengers on the same bus, close friends, co workers, and neighbors) | Yes                | Yes (308/0/308)                                                                        | -                                                                                                                                                                               |

| Reference                 | Location (country)                           | Study period (starting timepoint) | Study type            | Study population                                                  | No. of participants                                                         | Age of participants (Median, range/mean±SD)                                                        | Exposures                      | Symptom assessment | Serology collected (No. of single serum/paired sera/participants)                               | Comment                                                                                                              |
|---------------------------|----------------------------------------------|-----------------------------------|-----------------------|-------------------------------------------------------------------|-----------------------------------------------------------------------------|----------------------------------------------------------------------------------------------------|--------------------------------|--------------------|-------------------------------------------------------------------------------------------------|----------------------------------------------------------------------------------------------------------------------|
| Posfay-Barbe et al., 2020 | Geneva, Switzerland                          | Apr 2020                          | Cross-sectional study | Children seeking medical care                                     | 208                                                                         | Younger than 16 years old                                                                          | -                              | No                 | Yes (208/0/208)                                                                                 | -                                                                                                                    |
| Slot et al., 2020         | Netherlands                                  | Apr 2020                          | Cross-sectional study | Regular blood plasma donors                                       | 7361                                                                        | Range: 18-72 years old                                                                             | -                              | Yes                | Yes (7361/0/7361)                                                                               | -                                                                                                                    |
| Olayanju et al., 2020     | Oyo state, Nigeria                           | Apr 2020                          | Cross-sectional study | Frontline healthcare workers                                      | 133                                                                         | Range: 20-60 years old                                                                             | Contact with COVID-19 patients | Yes                | Yes (133/0/133)                                                                                 | And healthcare workers continued to attend patients with minimal precautionary measures.                             |
| Berte et al., 2020        | Milan and Cagliari, Italy; Erlangen, Germany | Apr 2020                          | Cross-sectional study | Inflammatory bowel diseases patients                              | 354                                                                         | Median (IQR): 43 (31-57) years old                                                                 | -                              | Yes                | Yes (354/0/354)                                                                                 | -                                                                                                                    |
| Ciechanowicz et al., 2020 | Warsaw, Poland                               | Apr 2020                          | Cross-sectional study | Patients with psoriasis treated with biologic therapy             | 61                                                                          | Median: 46 years old                                                                               | -                              | Yes                | Yes (61/0/61)                                                                                   | -                                                                                                                    |
| Ko et al., 2020           | South Korea                                  | Apr 2020                          | Cross-sectional study | COVID-19- designated HCWs; Non-COVID-19-designated HCWs           | COVID-19- designated HCWs: 309; Non-COVID-19-designated HCWs: 123           | COVID-19- designated HCWs: 31.1±7.84 years old; Non-COVID-19- designated HCWs: 34.9±10.9 years old | -                              | Yes                | Yes (COVID-19- designated HCWs: 309/0/309; Non-COVID-19-designated HCWs: 123/0/123)             | -                                                                                                                    |
| Lackermair et al., 2020   | Bavaria, Germany                             | Apr 2020                          | Cross-sectional study | Healthcare worker                                                 | 151                                                                         | 38 (26-47) years old                                                                               | -                              | Yes                | Yes (151/0/151)                                                                                 | -                                                                                                                    |
| Sotgiu et al., 2020       | Milan, Italy                                 | Apr 2020                          | Cross-sectional study | Healthcare worker                                                 | 202                                                                         | Median (IQR): 45 (35-54) years old                                                                 | Contact with Covid-19 patients | No                 | Yes (202/0/202)                                                                                 | No information was available on the adherence to the use of personal protective equipment by the healthcare workers. |
| Mohanty et al., 2020      | Texas, USA                                   | Apr 2020                          | Cross-sectional study | Asymptomatic patients, caregivers, and healthcare workers         | -                                                                           | 51.94±15.6 years old                                                                               | -                              | Yes                | Yes (1670/0/1670)                                                                               | -                                                                                                                    |
| Wu et al., 2020           | Wuhan, Hubei, China                          | Apr 2020                          | Cross-sectional study | People applying for a permission of resume; hospitalized patients | 1021 persons applying for a permission of resume; 381 hospitalized patients | -                                                                                                  | Poorly-defined exposure        | Yes                | Yes (Persons applying for a permission of resume: 1021/0/1021; Hospitalized patient: 381/0/381) | -                                                                                                                    |

| Reference                 | Location (country)  | Study period (starting timepoint) | Study type            | Study population                                                                     | No. of participants                                                                           | Age of participants (Median, range/mean±SD)                                                                              | Exposures                                | Symptom assessment                                                                              | Serology collected (No. of single serum/paired sera/participants)                                                    | Comment                                                                                                                                                                |
|---------------------------|---------------------|-----------------------------------|-----------------------|--------------------------------------------------------------------------------------|-----------------------------------------------------------------------------------------------|--------------------------------------------------------------------------------------------------------------------------|------------------------------------------|-------------------------------------------------------------------------------------------------|----------------------------------------------------------------------------------------------------------------------|------------------------------------------------------------------------------------------------------------------------------------------------------------------------|
| Stubblefield et al., 2020 | Tennessee, USA      | Apr 2020                          | Cross-sectional study | Healthcare worker worked in COVID-19 units                                           | 249                                                                                           | 33 (21-70) years old                                                                                                     | Direct contact with COVID-19 patients    | Yes                                                                                             | Yes (249/0/249)                                                                                                      | Enhanced use of PPE (face shield, gown and gloves in addition to a surgical mask) was instituted when interacting with patients known or suspected to have SARS-CoV-2. |
| Self et al., 2020         | 12 states, USA      | Apr 2020                          | Cross-sectional study | Frontline Health care personnel                                                      | 3248                                                                                          | Median: 36 years old                                                                                                     | Cared for patients with COVID-19,        | Yes                                                                                             | Yes (3248/0/3248)                                                                                                    | -                                                                                                                                                                      |
| Stellato et al., 2020     | Naples, Italy       | Apr 2020                          | Longitudinal study    | Patients, caregivers and health care workers                                         | 662                                                                                           | -                                                                                                                        | -                                        | No                                                                                              | Yes (unk/unk/662)                                                                                                    | -                                                                                                                                                                      |
| Flannery et al., 2020     | Pennsylvania, USA   | Apr 2020                          | Cross-sectional study | Pregnant women presenting for delivery                                               | 1293                                                                                          | Median (IQR): 31 (27-35) years old                                                                                       | -                                        | No                                                                                              | Yes (1293/0/1293)                                                                                                    | -                                                                                                                                                                      |
| Stock et al., 2020        | New York, USA       | Apr 2020                          | Cross-sectional study | Adult clinicians                                                                     | 98                                                                                            | 37.6±10.6 years old                                                                                                      | -                                        | Yes                                                                                             | Yes (98/0/98)                                                                                                        | -                                                                                                                                                                      |
| Goldberg et al., 2020     | Massachusetts, USA  | Apr 2020                          | Cross-sectional study | Staff members at a Skilled Nursing Facility; residents at a Skilled Nursing Facility | Staff members at a Skilled Nursing Facility: 97; residents at a Skilled Nursing Facility: 56; | Staff members at a Skilled Nursing Facility: 45 years old residents at a Skilled Nursing Facility: 83 (54-102) years old | Poorly-defined exposure                  | Yes (All were asymptomatic)                                                                     | Yes (Staff members at a Skilled Nursing Facility: 84/0/97, residents at a Skilled Nursing Facility: 56/0/56;)        | While appropriate PPE policies were in place, adherence cannot be confirmed.                                                                                           |
| Stringhini et al., 2020   | Geneva, Switzerland | Apr 2020                          | Cross-sectional study | General population                                                                   | Week1: 341; Week2: 469; Week3: 577; Week4: 604; Week5: 775; Overall: 2766                     | Older than 5 years old                                                                                                   | -                                        | Yes                                                                                             | Yes (week1: 341/0/341; week2: 469/0/469; week3: 577/0/577; week4: 604/0/604; week5: 775/0/775; overall: 2766/0/2766) | -                                                                                                                                                                      |
| Erikstrup et al., 2020    | Denmark             | Apr 2020                          | Cross-sectional study | Blood donors                                                                         | 20640                                                                                         | 17-69 years old                                                                                                          | Poorly-defined exposure                  | Yes (Donors must self-defer for two weeks if they develop fever with upper respiratory symptom) | Yes (20640/0/20640)                                                                                                  | -                                                                                                                                                                      |
| Lahner et al., 2020       | Rome, Italy         | Apr 2020                          | Cross-sectional study | Healthcare worker                                                                    | 2057                                                                                          | 46 (16-69) years old                                                                                                     | Exposure to SARS-CoV-2-positive subjects | Yes                                                                                             | Yes (1084/0/2057)                                                                                                    | Wearing of personal protective equipment for all HCWs.                                                                                                                 |

| Reference             | Location (country) | Study period (starting timepoint) | Study type            | Study population                                   | No. of participants | Age of participants (Median, range/mean±SD)                                                                   | Exposures                                                                                                                                    | Symptom assessment | Serology collected (No. of single serum/paired sera/participants) | Comment                                                                                                                                                                                                                                   |
|-----------------------|--------------------|-----------------------------------|-----------------------|----------------------------------------------------|---------------------|---------------------------------------------------------------------------------------------------------------|----------------------------------------------------------------------------------------------------------------------------------------------|--------------------|-------------------------------------------------------------------|-------------------------------------------------------------------------------------------------------------------------------------------------------------------------------------------------------------------------------------------|
| Labriola et al., 2020 | Brussels, Belgium  | Apr 2020                          | Longitudinal study    | Patients on in-center maintenance hemodialysis     | 98                  | 68.8±14 years old                                                                                             | -                                                                                                                                            | Yes                | Yes (98/0/98)                                                     | -                                                                                                                                                                                                                                         |
| Pallett et al., 2020  | London, UK         | Apr 2020                          | Cross-sectional study | Healthcare worker                                  | 1704                | Symptomatic healthcare worker (mean): 38.2 years old<br>Asymptomatic healthcare worker (mean): 42.4 years old | Delivered direct clinical care to SARS-CoV-2- positive inpatients in cohort areas or isolation rooms involving aerosol-generating procedures | Yes                | Yes (1704/0/1704)                                                 | -                                                                                                                                                                                                                                         |
| Sood et al., 2020     | California, USA    | Apr 2020                          | Cross-sectional study | General population                                 | 863                 | Older than 18 years old                                                                                       | -                                                                                                                                            | Yes                | Yes (863/0/863)                                                   | -                                                                                                                                                                                                                                         |
| Shakiba et al., 2020  | Guilan, Iran       | Apr 2020                          | Cross-sectional study | Residents                                          | 551                 | -                                                                                                             | -                                                                                                                                            | Yes                | Yes (551/0/551)                                                   | -                                                                                                                                                                                                                                         |
| Madsen et al., 2020   | Utah, USA          | Apr 2020                          | Cross-sectional study | ED employees                                       | 279                 | -                                                                                                             | -                                                                                                                                            | No                 | Yes (270/0/279)                                                   | Employees should continue to wear full personal protective equipment when caring for patients with respiratory complaints.                                                                                                                |
| Sims et al., 2020     | Michigan, USA      | Apr 2020                          | -                     | Healthcare worker                                  | 20614               | 43.1±13.0 years old                                                                                           | -                                                                                                                                            | Yes                | Yes (20614/0/20614)                                               | N-95 masks and eye protection distribution was centralized and anyone potentially working with COVID-19 patients could be issued an N-95 mask and eye protection on a daily basis. Requirements to sign in and out of rooms were removed. |
| Crovetto et al., 2020 | Barcelona, Spain   | Apr 2020                          | Cross-sectional study | Pregnant women attending first trimester screening | 874                 | -                                                                                                             | -                                                                                                                                            | Yes                | Yes (874/0/874)                                                   | -                                                                                                                                                                                                                                         |

| Reference                    | Location (country)          | Study period (starting timepoint) | Study type            | Study population                                                                                                                                                                              | No. of participants                                                                                                                                                                                                   | Age of participants (Median, range/mean±SD)                                                                                                                                                                                                                         | Exposures                                                                   | Symptom assessment | Serology collected (No. of single serum/paired sera/participants)                                                                                                                                                                                       | Comment                                                                                                                                                                           |
|------------------------------|-----------------------------|-----------------------------------|-----------------------|-----------------------------------------------------------------------------------------------------------------------------------------------------------------------------------------------|-----------------------------------------------------------------------------------------------------------------------------------------------------------------------------------------------------------------------|---------------------------------------------------------------------------------------------------------------------------------------------------------------------------------------------------------------------------------------------------------------------|-----------------------------------------------------------------------------|--------------------|---------------------------------------------------------------------------------------------------------------------------------------------------------------------------------------------------------------------------------------------------------|-----------------------------------------------------------------------------------------------------------------------------------------------------------------------------------|
| Gudbjartsson et al., 2020    | Iceland                     | Apr 2020                          | Cross-sectional study | Persons contact with the Icelandic health care system for reasons other than Covid-19; Icelanders in the greater Reykjavik area; Residents of Vestmannaeyjar; Icelanders had been quarantined | Persons contact with the Icelandic health care system for reasons other than Covid-19: 18609; Icelanders in the greater Reykjavik area: 4843; Residents of Vestmannaeyjar: 663; Icelanders had been quarantined: 4222 | Persons contact with the Icelandic health care system for reasons other than Covid-19: 56±20 years old; Icelanders in the greater Reykjavik area: 48 ±13 years old; Residents of Vestmannaeyjar: 52 ±18 years old; Icelanders had been quarantined: 47±17 years old | -                                                                           | Yes                | Yes (Persons contact with the Icelandic health care system for reasons other than Covid-19: 18609/0/18609, Icelanders in the greater Reykjavik area: 4843/0/4843, Residents of Vestmannaeyjar: 663/0/663, Icelanders had been quarantined: 4222/0/4222) | -                                                                                                                                                                                 |
| Naranbhai et al., 2020       | Massachusetts, USA          | Apr 2020                          | Cross-sectional study | Asymptomatic residents                                                                                                                                                                        | 200                                                                                                                                                                                                                   | Median (IQR): 46 (27-55) years old                                                                                                                                                                                                                                  | -                                                                           | Yes                | Yes (200/0/200)                                                                                                                                                                                                                                         | -                                                                                                                                                                                 |
| Herzberg et al., 2020        | Schleswig-Holstein, Germany | Apr 2020                          | Longitudinal study    | Hospital employees and nurses                                                                                                                                                                 | 871                                                                                                                                                                                                                   | Range: 18-90 years old                                                                                                                                                                                                                                              | -                                                                           | No                 | Yes (0/0/871)                                                                                                                                                                                                                                           | All employees working with COVID-19 suspected or confirmed patients must wear personal protective equipment (PPE) including filtering face piece-masks type 2 or 3 (FFP-2/FFP-3). |
| Dacosta-Urbieto et al., 2020 | Galicia, Spain              | Apr 2020                          | cross-sectional study | Healthcare workers                                                                                                                                                                            | 175                                                                                                                                                                                                                   | -                                                                                                                                                                                                                                                                   | 22.5% of the workers had a known exposure to SARS-CoV-2- positive patients. | Yes                | Yes (175/0/175)                                                                                                                                                                                                                                         | -                                                                                                                                                                                 |
| Lumley et al., 2020          | South-East England, USA     | Apr 2020                          | Cross-sectional study | Antenatal women                                                                                                                                                                               | 1000                                                                                                                                                                                                                  | Median (IQR): 32 (28-35) years old                                                                                                                                                                                                                                  | -                                                                           | No                 | Yes (1000/0/1000)                                                                                                                                                                                                                                       | -                                                                                                                                                                                 |
| Rudberg et al., 2020         | Stockholm, Sweden           | Apr 2020                          | Cross-sectional study | Healthcare worker                                                                                                                                                                             | 2149                                                                                                                                                                                                                  | 44±12 years old                                                                                                                                                                                                                                                     | Exposure to patients infected with covid-19                                 | Yes                | Yes (2149/0/2149)                                                                                                                                                                                                                                       | -                                                                                                                                                                                 |
| Buntinx et al., 2020         | Belgium                     | Apr 2020                          | Cross-sectional study | Residents and staff member in a nursing home                                                                                                                                                  | Residents: 100; Staff member: 88                                                                                                                                                                                      | -                                                                                                                                                                                                                                                                   | -                                                                           | Yes                | Yes (Residents: 100/0/100, Staff member: 80/0/80)                                                                                                                                                                                                       | -                                                                                                                                                                                 |
| Martin et al., 2020          | Brussels, Belgium           | Apr 2020                          | Longitudinal study    | Staff members worked in a tertiary reference hospital for infectious diseases                                                                                                                 | 532                                                                                                                                                                                                                   | 37 (21-66) years old                                                                                                                                                                                                                                                | All staff members worked in the Covid-19 highly exposed units               | Yes                | Yes (0/326/532)                                                                                                                                                                                                                                         | They followed the ECDC recommendations for the use of PPE.                                                                                                                        |

| Reference                    | Location (country)    | Study period (starting timepoint) | Study type            | Study population                          | No. of participants                                   | Age of participants (Median, range/mean±SD)                                           | Exposures                                                   | Symptom assessment | Serology collected (No. of single serum/paired sera/participants)         | Comment |
|------------------------------|-----------------------|-----------------------------------|-----------------------|-------------------------------------------|-------------------------------------------------------|---------------------------------------------------------------------------------------|-------------------------------------------------------------|--------------------|---------------------------------------------------------------------------|---------|
| Amendola et al., 2020        | Milan, Italy          | Apr 2020                          | Cross-sectional study | Healthcare worker                         | 663                                                   | Median: 44 years old                                                                  | -                                                           | Yes                | Yes (663/0/663)                                                           | -       |
| Iversen et al., 2020         | Denmark               | Apr 2020                          | Cross-sectional study | Healthcare worker; Blood donors           | Healthcare worker: 28792; Blood donors: 4672          | Healthcare worker: 44.4±12.6<br>Blood donors: 40.7±13.4                               | -                                                           | Yes                | Yes (Healthcare worker: 28792/0/28792, Blood donors: 4672/0/4672)         | -       |
| Olalla et al., 2020          | Marbella, Spain       | Apr 2020                          | Cross-sectional study | Health care workers                       | 498                                                   | Mean: 41.5 years old                                                                  | Contact with CoVID-19 cases inside or outside the workplace | Yes                | Yes (498/0/498)                                                           | -       |
| Cosma et al., 2020           | Piedmont, Italy       | Apr 2020                          | Cross-sectional study | Pregnant women                            | 138                                                   | 32.6 ± 3.54 for seropositive individuals;<br>33.9 ± 4.63 for seronegative individuals | -                                                           | Yes                | Yes (138/0/138)                                                           | -       |
| Caban-Martinez et al., 2020  | South Florida, USA    | Apr 2020                          | Cross-sectional study | Frontline firefighter/paramedic workforce | 203                                                   | Older than 21 years old                                                               | -                                                           | Yes                | Yes (203/0/203)                                                           | -       |
| Poletti et al., 2020         | Lombardy, Italy       | Apr 2020                          | Cross-sectional study | Close contacts of COVID-19 cases          | 5484                                                  | Median (IQR): 50 (30-61) years old                                                    | Contact with COVID-19 cases                                 | No                 | Yes (4120/0/5484)                                                         | -       |
| Waterfield et al., 2020      | UK                    | Apr 2020                          | Longitudinal study    | Healthy children of healthcare workers    | 1007                                                  | 10.1 (2-15) years old                                                                 | Confirmed household contact                                 | Yes                | Yes (992/0/1007)                                                          | -       |
| Racine-Brzostek et al., 2020 | New York, USA         | Apr 2020                          | Cross-sectional study | Health care workers                       | 2274                                                  | 37 (31-48) years old                                                                  | Patient-facing for physicians                               | Yes                | Yes (2274/0/2274)                                                         | -       |
| Calcagno et al., 2020        | Turin, Italy          | Apr 2020                          | Cross-sectional study | Healthcare workers                        | 5444                                                  | 49.4±10.6 years old                                                                   | Contacts with COVID-19 patients                             | No                 | Yes (5444/0/5444)                                                         | -       |
| Poustchi et al., 2020        | Iran                  | Apr 2020                          | Cross-sectional study | General population; High-risk populations | General population: 3530; High-risk populations: 5372 | All ages                                                                              | -                                                           | Yes                | Yes (General population: 3530/0/3530; High-risk populations: 5372/0/5372) | -       |
| Cito et al., 2020            | Abruzzo region, Italy | Apr 2020                          | Cross-sectional study | Villagers                                 | 687                                                   | All ages                                                                              | -                                                           | Yes                | Yes (667/0/687)                                                           | -       |
| Rosenberg et al., 2020       | New York, USA         | Apr 2020                          | Cross-sectional study | General population                        | 15626                                                 | Older than 18 years old                                                               | -                                                           | No                 | Yes (15101/0/15626)                                                       | -       |

| Reference               | Location (country)                           | Study period (starting timepoint) | Study type            | Study population                                                      | No. of participants                                                             | Age of participants (Median, range/mean±SD)                                                             | Exposures                                                                                                                                 | Symptom assessment | Serology collected (No. of single serum/paired sera/participants)                                 | Comment                                                                                                                |
|-------------------------|----------------------------------------------|-----------------------------------|-----------------------|-----------------------------------------------------------------------|---------------------------------------------------------------------------------|---------------------------------------------------------------------------------------------------------|-------------------------------------------------------------------------------------------------------------------------------------------|--------------------|---------------------------------------------------------------------------------------------------|------------------------------------------------------------------------------------------------------------------------|
| Daniel et al., 2020     | USS Theodore Roosevelt aircraft carrier, USA | Apr 2020                          | Cross-sectional study | Service member                                                        | 382                                                                             | 18-59 years old                                                                                         | Service member may contact with the 1000 service members who were previously determined to be infected with SARS-CoV-2 during the period. | Yes                | Yes (382/0/382)                                                                                   | -                                                                                                                      |
| Schmidt et al., 2020    | Lower Saxony, Germany                        | Apr 2020                          | Cross-sectional study | Clinic staff                                                          | 406                                                                             | Older than 18 years old                                                                                 | -                                                                                                                                         | Yes                | Yes (385/0/406)                                                                                   | All employees are constantly carrying FFP1 masks for their protection when in contact with the patients or co-workers. |
| Moscola et al., 2020    | New York, USA                                | Apr 2020                          | Cross-sectional study | Health Care Personnel in the New York City Area                       | 46117                                                                           | Median (IQR): 42 (31.5–34.5) years old                                                                  | Working in a COVID-19–positive unit                                                                                                       | No                 | Yes (40329/0/46117)                                                                               | All Northwell HCP (employees) were provided with personal protective equipment from March 7, 2020, onward.             |
| Tarabichi et al., 2020  | Ohio, USA                                    | Apr 2020                          | Longitudinal study    | Public first responders                                               | 296                                                                             | -                                                                                                       | -                                                                                                                                         | Yes                | Yes (36/260/296)                                                                                  | -                                                                                                                      |
| Rosser et al., 2020     | California, USA                              | Apr 2020                          | Cross-sectional study | Healthcare personnel                                                  | 10449                                                                           | 18-84 years old                                                                                         | -                                                                                                                                         | Yes                | Yes (10449/0/10449)                                                                               | -                                                                                                                      |
| Armin et al., 2020      | Tehran, Iran                                 | Apr 2020                          | Cross-sectional study | Staff of a Children's Hospital                                        | 475                                                                             | Younger than 62 years old                                                                               | -                                                                                                                                         | Yes                | Yes (475/0/475)                                                                                   | -                                                                                                                      |
| Montenegro et al., 2020 | Barcelona, Spain                             | Apr 2020                          | Longitudinal study    | Community individuals; patients consulting the primary care physician | Community individuals: 311; patients consulting the primary care physician: 743 | Community individuals: 43.7±21.79; patients consulting the primary care physician: 46.97±20.0 years old | -                                                                                                                                         | Yes                | Yes (Community individuals: 311/0/311, patients consulting the primary care physician: 634/0/743) | -                                                                                                                      |
| Kaufman et al., 2020    | USA                                          | Apr 2020                          | Longitudinal study    | national clinical laboratory residual specimen                        | 2437336                                                                         | -                                                                                                       | -                                                                                                                                         | No                 | Yes (2120379/316957/2437336)                                                                      | -                                                                                                                      |
| Ahmad et al., 2020      | California, USA                              | Apr 2020                          | Cross-sectional study | High-risk populations                                                 | 244                                                                             | Mean: 51.1 years old                                                                                    | -                                                                                                                                         | Yes                | Yes (244/0/244)                                                                                   | -                                                                                                                      |



| Reference              | Location (country) | Study period (starting timepoint) | Study type            | Study population                                                                                                                                | No. of participants                                                                                                                                               | Age of participants (Median, range/mean±SD)                                                                                                                                                                                                                 | Exposures                                                                                                     | Symptom assessment | Serology collected (No. of single serum/paired sera/participants)                                                                                                                                 | Comment                                                                                                                                              |
|------------------------|--------------------|-----------------------------------|-----------------------|-------------------------------------------------------------------------------------------------------------------------------------------------|-------------------------------------------------------------------------------------------------------------------------------------------------------------------|-------------------------------------------------------------------------------------------------------------------------------------------------------------------------------------------------------------------------------------------------------------|---------------------------------------------------------------------------------------------------------------|--------------------|---------------------------------------------------------------------------------------------------------------------------------------------------------------------------------------------------|------------------------------------------------------------------------------------------------------------------------------------------------------|
| Steensels et al., 2020 | Belgium            | Apr 2020                          | Cross-sectional study | Hospital staff                                                                                                                                  | 3056                                                                                                                                                              | 39.5 ± 13.1 for seropositive individuals; 41.3 ± 12.4 for seronegative individuals                                                                                                                                                                          | Contact with COVID-19 patients                                                                                | Yes                | Yes (3056/0/3056)                                                                                                                                                                                 | -                                                                                                                                                    |
| Mostafa et al., 2020   | Cairo, Egypt       | Apr 2020                          | Cross-sectional study | Health care workers                                                                                                                             | 4040                                                                                                                                                              | Older than 18 years old                                                                                                                                                                                                                                     | Contact with a confirmed case or suspected case                                                               | Yes                | Yes (4040/0/4040)                                                                                                                                                                                 | -                                                                                                                                                    |
| Kantele et al., 2020   | Helsinki, Finland  | Apr 2020                          | Cross-sectional study | Healthcare workers                                                                                                                              | 1131                                                                                                                                                              | Median (IQR): 38 (31-48) years old                                                                                                                                                                                                                          | Known contacts with Covid-19 patients, Contact with persons with Covid-19/suspicion of Covid-19/travel abroad | Yes                | Yes (1095/0/1131)                                                                                                                                                                                 | -                                                                                                                                                    |
| Soriano et al., 2020   | Madrid, Spain      | Apr 2020                          | Cross-sectional study | University employees; University employees' relatives; Social services and health care workers; Individuals living in communities; Other people | 175 University employees; 85 University employees' relatives; 108 Social services and health care workers; 234 Individuals living in communities; 72 other people | University employees: 44 (31, 67) years old; University employees' relatives: 41 (18, 76) years old; Social services and health care workers: 42 (21, 79) years old; Individuals living in communities: 60 (20, 89) years old; Other: 53 (18, 76) years old | -                                                                                                             | Yes                | Yes (University employees: 175/0/175, University employees' relatives: 85/0/85, Social services and health care workers: 108/0/108, Individuals living in communities: 234/0/234, Other: 72/0/72) | -                                                                                                                                                    |
| Eyre et al., 2020      | Oxford, UK         | Apr 2020                          | Cross-sectional study | Health care workers                                                                                                                             | 10610                                                                                                                                                             | Older than 18 years old                                                                                                                                                                                                                                     | Contact with a confirmed or suspected case.                                                                   | Yes                | Yes (9958/0/10610)                                                                                                                                                                                | From 1st February 2020, "level-2 PPE" (FFP3/N99 mask, eye protection, gown, gloves) was mandated for any contact with a confirmed or suspected case. |
| Halatoko et al., 2020  | Lomé, Togo         | Apr 2020                          | Cross-sectional study | High-risk populations                                                                                                                           | 955                                                                                                                                                               | Median (IQR): 36 (32-43) years old                                                                                                                                                                                                                          | -                                                                                                             | Yes                | Yes (955/0/955)                                                                                                                                                                                   | -                                                                                                                                                    |
| Shields et al., 2020   | Birmingham, UK     | Apr 2020                          | Cross-sectional study | Health-care workers                                                                                                                             | 516                                                                                                                                                               | Median (IQR): 42 (30-51) years old                                                                                                                                                                                                                          | -                                                                                                             | Yes                | Yes (516/0/516)                                                                                                                                                                                   | -                                                                                                                                                    |

| Reference                   | Location (country)     | Study period (starting timepoint) | Study type            | Study population                                                            | No. of participants                                          | Age of participants (Median, range/mean±SD)                                              | Exposures                                                                                                                                         | Symptom assessment | Serology collected (No. of single serum/paired sera/participants)             | Comment                                                 |
|-----------------------------|------------------------|-----------------------------------|-----------------------|-----------------------------------------------------------------------------|--------------------------------------------------------------|------------------------------------------------------------------------------------------|---------------------------------------------------------------------------------------------------------------------------------------------------|--------------------|-------------------------------------------------------------------------------|---------------------------------------------------------|
| Makaronidis et al., 2020    | London, UK             | Apr 2020                          | Cross-sectional study | People with an acute loss in their sense of smell and/or taste in community | 590                                                          | 39.4±12 years old                                                                        | -                                                                                                                                                 | Yes                | Yes (567/0/590)                                                               | -                                                       |
| Guerriero et al., 2020      | Verona, Italy          | Apr 2020                          | Cross-sectional study | Verona population                                                           | 1515                                                         | 49.1±21.2 years old                                                                      | -                                                                                                                                                 | Yes                | Yes (1515/0/1515)                                                             | -                                                       |
| Menachemi et al., 2020      | Indiana, USA           | Apr 2020                          | Cross-sectional study | Indiana residents (random sample); Indiana residents (non-random sample)    | 3658<br>898                                                  | Older than 12 years old                                                                  | -                                                                                                                                                 | No                 | Yes (3518/0/3658; 898/0/898)                                                  | -                                                       |
| Vilibic-Cavlek et al., 2020 | Croatia                | Apr 2020                          | Cross-sectional study | Personnel in the healthcare facilities                                      | 592                                                          | Range: 20-65 years old                                                                   | Contact with a confirmed COVID-19 patient, participation in large community events, and travelling to areas with documented COVID-19 transmission | Yes                | Yes (592/0/592)                                                               | -                                                       |
| Pollán et al., 2020         | Spain                  | Apr 2020                          | Cross-sectional study | General population                                                          | 61075                                                        | All ages                                                                                 | -                                                                                                                                                 | Yes                | Yes (61075/0/61075)                                                           | -                                                       |
| Petersen et al., 2020       | Faroe Islands, Denmark | Apr 2020                          | Cross-sectional study | Inhabitants of the Faroe Islands                                            | 1500                                                         | 42.1±23.1 years old                                                                      | -                                                                                                                                                 | Yes                | Yes (1075/0/1500)                                                             | -                                                       |
| Bajema et al., 2020         | Georgia, USA           | Apr 2020                          | Cross-sectional study | Commercial laboratory residual Sera                                         | 1343                                                         | All ages                                                                                 | -                                                                                                                                                 | No                 | Yes (1343/0/1343)                                                             | -                                                       |
| Biggs et al., 2020          | Georgia, USA           | Apr 2020                          | Cross-sectional study | Community household residents                                               | 696                                                          | All ages                                                                                 | -                                                                                                                                                 | Yes                | Yes (696/0/696)                                                               | -                                                       |
| Sydney et al., 2020         | New York, USA          | Apr 2020                          | Cross-sectional study | Healthcare workers                                                          | 1700                                                         | -                                                                                        | -                                                                                                                                                 | Yes                | Yes (1700/0/1700)                                                             | -                                                       |
| Brotens et al., 2020        | Barcelona, Spain       | Apr 2020                          | Cross-sectional study | Children household member; Adult household member.                          | Children household member: 672; Adult household member: 412. | Children household member: 5.9±3.7 years old; Adult household member: 40±10.2 years old. | Household contact                                                                                                                                 | No                 | Yes (Children household member: 672/0/672, Adult household member: 412/0/412) | -                                                       |
| Hunter et al., 2020         | Indiana, USA           | Apr 2020                          | Cross-sectional study | Healthcare worker                                                           | 734                                                          | Mean: 43 years old                                                                       | -                                                                                                                                                 | No                 | Yes (734/0/734)                                                               | Institutional application of WHO guidelines for PPE use |

| Reference               | Location (country) | Study period (starting timepoint) | Study type            | Study population                                                            | No. of participants  | Age of participants (Median, range/mean±SD)                              | Exposures                                                        | Symptom assessment | Serology collected (No. of single serum/paired sera/participants)                                                  | Comment                            |
|-------------------------|--------------------|-----------------------------------|-----------------------|-----------------------------------------------------------------------------|----------------------|--------------------------------------------------------------------------|------------------------------------------------------------------|--------------------|--------------------------------------------------------------------------------------------------------------------|------------------------------------|
| Tilley et al., 2020     | California, USA    | Apr 2020                          | Cross-sectional study | University student population                                               | 790                  | -                                                                        | -                                                                | Yes                | Yes (790/0/790)                                                                                                    | -                                  |
| Tsatsaris et al., 2020  | Paris, France      | Apr 2020                          | Cross-sectional study | Pregnant women                                                              | 529                  | 33.7±4.7 years old                                                       | -                                                                | Yes                | Yes (529/0/529)                                                                                                    | -                                  |
| Uyoga et al., 2020      | Kenya              | Apr 2020                          | Cross-sectional study | Blood donors                                                                | 3174                 | 15-66 years old                                                          | -                                                                | No                 | Yes (3098/0/3174)                                                                                                  | -                                  |
| Josè et al., 2020       | Foggia, Italy      | May 2020                          | Cross-sectional study | Healthy blood donors                                                        | 904                  | 18-65 years old                                                          | -                                                                | Yes                | Yes (904/0/904)                                                                                                    | -                                  |
| Paderno et al., 2020    | Italy              | May 2020                          | Cross-sectional study | Healthcare worker in otolaryngology unit                                    | 58                   | Mean: 41 years old                                                       | Contacts with infected patients in hospital and outside hospital | Yes                | Yes (58/0/58)                                                                                                      | Adequate PPE were used in hospital |
| Merkely et al., 2020    | Hungary            | May 2020                          | Cross-sectional study | Hungarian population                                                        | 10504                | 48.7±18.0 years old                                                      | -                                                                | Yes                | Yes (10474/0/10504)                                                                                                | -                                  |
| Addetia et al., 2020    | Washington, USA    | May 2020                          | Cross-sectional study | Ship's crew                                                                 | 122                  | -                                                                        | -                                                                | No                 | Yes (120/0/122)                                                                                                    | -                                  |
| Ladhani et al., 2020    | London, UK         | May 2020                          | Cross-sectional study | Children of healthcare workers with confirmed COVID-19                      | 44                   | -                                                                        | -                                                                | Yes                | Yes (44/0/44)                                                                                                      | -                                  |
| Nailescu et al., 2020   | Indiana, USA       | May 2020                          | Cross-sectional study | Pediatric kidney transplant recipients                                      | 31                   | Median (IQR): 12 (2-21) years old                                        | -                                                                | Yes                | Yes (31/0/31)                                                                                                      | -                                  |
| Sperotto et al., 2020   | Udine, Italy       | May 2020                          | Cross-sectional study | Allogeneic stem cell transplantation recipients                             | 70                   | Median (IQR): 56 (23-73) years old                                       | -                                                                | Yes                | Yes (70/0/70)                                                                                                      | -                                  |
| Mack et al., 2020       | Germany            | May 2020                          | Longitudinal study    | Professional football players and staff                                     | 1157                 | -                                                                        | -                                                                | No                 | Yes (150/1007/1157)                                                                                                | -                                  |
| Belingheri et al., 2020 | Lombardy, Italy    | May 2020                          | Cross-sectional study | Healthcare worker                                                           | 3520                 | Median (IQR): 47 (35-55) years old                                       | -                                                                | No                 | Yes (3520/0/3520)                                                                                                  | -                                  |
| Lastrucci et al., 2020  | Tuscany, Italy     |                                   |                       | 'health service' group<br>'support service' group<br>'work-from-home' group | 2828;<br>1103<br>725 | 48 (38-56) years old;<br>50 (36-61) years old;<br>49 (39.7-56) years old | -                                                                | No                 | Yes ('health service' group: 2828/0/2828; 'support service' group: 1103/0/1103; 'work-from-home' group: 725/0/725) | -                                  |

| Reference                | Location (country)          | Study period (starting timepoint) | Study type            | Study population                                          | No. of participants                                               | Age of participants (Median, range/mean±SD)                                                         | Exposures                                                                                                           | Symptom assessment                                         | Serology collected (No. of single serum/paired sera/participants)                 | Comment                                                                                                                                    |
|--------------------------|-----------------------------|-----------------------------------|-----------------------|-----------------------------------------------------------|-------------------------------------------------------------------|-----------------------------------------------------------------------------------------------------|---------------------------------------------------------------------------------------------------------------------|------------------------------------------------------------|-----------------------------------------------------------------------------------|--------------------------------------------------------------------------------------------------------------------------------------------|
| Dioscoridi et al., 2020  | Milan, Italy                | May 2020                          | Cohort study          | Family members of healthcare workers; healthcare workers  | Family members of healthcare workers: 81; health care workers: 38 | Family members of healthcare workers: unk; healthcare workers: 47±18 years old                      | Health care workers: working in a COVID-19 hospital; Family members lived in the same house with healthcare workers | Yes                                                        | Yes (Family members: 81/0/81, healthcare workers: 38/0/38)                        | In-hospital infection control measures and personal protective equipment use were in line with national and international recommendations. |
| Péré et al., 2020        | Paris, France               | May 2020                          | Cross-sectional study | Healthcare workers                                        | 3569                                                              | Median: 39.6 years old                                                                              | -                                                                                                                   | No                                                         | Yes (3569/0/3569)                                                                 | -                                                                                                                                          |
| Borges et al., 2020      | Sergipe, Brazil             | May 2020                          | Cross-sectional study | Asymptomatic residents                                    | 3046                                                              | 39.76±16.83 years old                                                                               | -                                                                                                                   | Yes                                                        | Yes (2921/0/3046)                                                                 | -                                                                                                                                          |
| Torres et al., 2020      | Santiago, Chile             | May 2020                          | Cross-sectional study | Students; Staff members                                   | 1029 students and 240 staff members                               | Students: 10.8±4.1 years old; Staff members: 42.8±10.4 years old                                    | Contact with more than 1 confirmed Covid-19 case                                                                    | Yes                                                        | Yes (Students: 1009/0/1029, Staff members: 235/0/240)                             | -                                                                                                                                          |
| Poulikakos et al., 2020  | North West England, UK      | May 2020                          | Cross-sectional study | Healthcare workers                                        | 281                                                               | -                                                                                                   | Directly involved in patient care                                                                                   | Yes                                                        | Yes (281/0/281)                                                                   | -                                                                                                                                          |
| Veerus et al., 2020      | Estonia                     | May 2020                          | Cross-sectional study | Pregnant women                                            | 433                                                               | 31±5.89 years old                                                                                   | -                                                                                                                   | No                                                         | Yes (433/0/433)                                                                   | -                                                                                                                                          |
| Brunner et al., 2020     | rural upstate New York, USA | May 2020                          | Cross-sectional study | Employees of Bassett Healthcare Network; Patients         | Employees of Bassett Healthcare Network: 764 Patients: 762        | Employees of Bassett: unk; Healthcare Network: range: 19-78 years old                               | -                                                                                                                   | Employees of Bassett Healthcare Network: Yes. Patients: No | Yes (Employees of Bassett Healthcare Network: (764/0/764), patients: (762/0/762)) | -                                                                                                                                          |
| Vijh et al., 2020        | British Columbia, Canada    | May 2020                          | Cross-sectional study | Residents in both facilities; Staff in both facilities    | Residents in both facilities: 127; Staff in both facilities: 176  | Residents in both facilities: median: 86 years old; Staff in both facilities: median: 49 years old. | -                                                                                                                   | Yes                                                        | Yes (Residents in both facilities: 122/0/127, patients: 169/0/176)                | -                                                                                                                                          |
| Rashid-Abdi et al., 2020 | Vasteras, Sweden            | May 2020                          | Longitudinal study    | Healthcare workers at a department of Infectious diseases | 120                                                               | 39±12 years old                                                                                     | -                                                                                                                   | Yes                                                        | Yes (120/unk/120)                                                                 | -                                                                                                                                          |
| Stefanelli et al., 2020  | Trento, Italy               | May 2020                          | Cross-sectional study | Resident                                                  | 6098                                                              | Older than 10 years old                                                                             | -                                                                                                                   | Yes                                                        | Yes (6098/0/6098)                                                                 | -                                                                                                                                          |
| Feehan et al., 2020      | Louisiana, USA              | May 2020                          | Cross-sectional study | General population                                        | 2640                                                              | Mean: 50.6 years old                                                                                | -                                                                                                                   | No                                                         | Yes (2640/0/2640)                                                                 | -                                                                                                                                          |

| Reference             | Location (country)     | Study period (starting timepoint) | Study type            | Study population                                                                                                  | No. of participants                                                                                                              | Age of participants (Median, range/mean±SD)                                                                                                                                        | Exposures                                               | Symptom assessment                       | Serology collected (No. of single serum/paired sera/participants)                                                                                        | Comment                                                                                                                                                                             |
|-----------------------|------------------------|-----------------------------------|-----------------------|-------------------------------------------------------------------------------------------------------------------|----------------------------------------------------------------------------------------------------------------------------------|------------------------------------------------------------------------------------------------------------------------------------------------------------------------------------|---------------------------------------------------------|------------------------------------------|----------------------------------------------------------------------------------------------------------------------------------------------------------|-------------------------------------------------------------------------------------------------------------------------------------------------------------------------------------|
| Sutton et al., 2020   | Oregon, USA            | May 2020                          | Cross-sectional study | Patients visiting ambulatory, emergency, or inpatient health care setting                                         | 897                                                                                                                              | All ages                                                                                                                                                                           | -                                                       | No                                       | Yes (897/0/897)                                                                                                                                          | -                                                                                                                                                                                   |
| Bampoe et al., 2020   | London, UK             | May 2020                          | Cross-sectional study | Maternity healthcare workers                                                                                      | 200                                                                                                                              | Older than 18 years old                                                                                                                                                            | Patient-facing                                          | Yes                                      | Yes (200/0/200)                                                                                                                                          | It was not until 1 June 2020 that all staff members in patient-facing areas were advised by Public Health England to wear surgical masks to reduce the risk of infection to others. |
| Cento et al., 2020    | Milan, Italy           | May 2020                          | Cross-sectional study | Consecutive patients                                                                                              | 2753                                                                                                                             | All ages                                                                                                                                                                           | -                                                       | No                                       | Yes (2753/0/2753)                                                                                                                                        | -                                                                                                                                                                                   |
| Rivas et al., 2020    | California, USA        | May 2020                          | Cross-sectional study | Healthcare workers                                                                                                | 6201                                                                                                                             | 41.46±12.01 years old                                                                                                                                                              | -                                                       | Yes                                      | Yes (6201/0/6201)                                                                                                                                        | -                                                                                                                                                                                   |
| Capasso et al., 2020  | Campania Region, Italy | May 2020                          | Cross-sectional study | Multiple sclerosis patients; University staff from non-clinical departments; Healthcare staff from COVID-19 wards | Multiple sclerosis patients: 310; University staff from non-clinical departments: 862; Healthcare staff from COVID-19 wards: 235 | Multiple sclerosis patients: 42.3 ± 12.4 years old; University staff from non-clinical departments: 42.9±13.3 years old; Healthcare staff from COVID-19 wards: 39.4±10.9 years old | -                                                       | Yes                                      | Yes (Multiple sclerosis patients: 310/0/310; University staff from non-clinical departments: 862/0/862; Healthcare staff from COVID-19 wards: 235/0/235) | -                                                                                                                                                                                   |
| Murhekar et al., 2020 | India                  | May 2020                          | Cross-sectional study | General population                                                                                                | 28000                                                                                                                            | Older than 18 years old                                                                                                                                                            | -                                                       | Yes                                      | Yes (28000/0/28000)                                                                                                                                      | -                                                                                                                                                                                   |
| Tong et al., 2020     | Jiangsu, China         | May 2020                          | Cross-sectional study | Medical staff who went to Wuhan city for support                                                                  | 222                                                                                                                              | 32 (24-58) years old                                                                                                                                                               | Directly involved in patient care                       | Yes                                      | Yes (191/0/222)                                                                                                                                          | -                                                                                                                                                                                   |
| Iwuji et al., 2020    | Texas, USA             | May 2020                          | Cross-sectional study | First responders                                                                                                  | 683                                                                                                                              | 18-76 years old                                                                                                                                                                    | -                                                       | Yes                                      | Yes (683/0/683)                                                                                                                                          | -                                                                                                                                                                                   |
| Mughal et al., 2020   | New Jersey, USA        | May 2020                          | Cross-sectional study | Healthcare personnel in the ICU setting.                                                                          | 134                                                                                                                              | Median (IQR) :39.2 (28.0-48.5) years old                                                                                                                                           | Exposed to critically ill COVID-19 patients in ICU unit | Yes (All participants were asymptomatic) | Yes (121/0/134)                                                                                                                                          | Proper education and utilization of personal protective equipment                                                                                                                   |

| Reference                    | Location (country)              | Study period (starting timepoint) | Study type            | Study population                                                                                  | No. of participants                                                                                           | Age of participants (Median, range/mean±SD) | Exposures                                                                          | Symptom assessment | Serology collected (No. of single serum/paired sera/participants)                                                               | Comment                                                           |
|------------------------------|---------------------------------|-----------------------------------|-----------------------|---------------------------------------------------------------------------------------------------|---------------------------------------------------------------------------------------------------------------|---------------------------------------------|------------------------------------------------------------------------------------|--------------------|---------------------------------------------------------------------------------------------------------------------------------|-------------------------------------------------------------------|
| Hallal et al., 2020          | Nationwide, Brazil              | May 2020                          | Cross-sectional study | Community residents                                                                               | Round1: 25025;<br>Round2: 31165                                                                               | All ages                                    | -                                                                                  | No                 | Yes (Round1: (24995/0/25025), Round2: (31162/0/31165))                                                                          | -                                                                 |
| Delmas et al., 2020          | Paris, France                   | May 2020                          | Cross-sectional study | Health care workers                                                                               | 4607                                                                                                          | 41.8±12.6 years old                         | Contact to covid-19 cases                                                          | Yes                | Yes (4607/0/4607)                                                                                                               | Masks were compulsory and protective equipment was available      |
| Costa et al., 2020           | São Paulo, Brazil               | May 2020                          | Cross-sectional study | Asymptomatic healthcare workers                                                                   | 5645                                                                                                          | All ages                                    | -                                                                                  | Yes                | Yes (4987/0/5645)                                                                                                               | Personal protective equipment (PPE) was made available to all HCW |
| Zhang et al., 2020           | Jiangsu, China                  | May 2020                          | Cross-sectional study | Close contacts of COVID-19 patients                                                               | 284                                                                                                           | -                                           | Contact with COVID-19 patients                                                     | Yes                | Yes (120/0/284)                                                                                                                 | -                                                                 |
| Pan et al., 2020             | Hubei, China                    | May 2020                          | Cross-sectional study | Community individuals                                                                             | 61437                                                                                                         | Median (IQR): 48 (32-64) years old          | -                                                                                  | No                 | Yes (61437/0/61437)                                                                                                             | -                                                                 |
| Akinbami et al., 2020        | Michigan, USA                   | May 2020                          | Cross-sectional study | Healthcare, First Response, and Public Safety Personnel                                           | 16397                                                                                                         | Range: 19-82 years old                      | -                                                                                  | No                 | Yes (16397/0/16397)                                                                                                             | -                                                                 |
| Kempen et al., 2020          | Addis Ababa, Ethiopia           | May 2020                          | Cross-sectional study | Resident in Addis Ababa                                                                           | 99                                                                                                            | Older than 14 years old                     | -                                                                                  | Yes                | Yes (99/0/99)                                                                                                                   | -                                                                 |
| Pagani et al., 2020          | Lombardy, Italy                 | May 2020                          | Cross-sectional study | Population of Castiglione D'Adda                                                                  | 562                                                                                                           | All ages                                    | Contact with verified case                                                         | Yes                | Yes (509/0/562)                                                                                                                 | -                                                                 |
| Jespersen et al., 2020       | Central Denmark Region, Denmark | May 2020                          | Cross-sectional study | Healthcare workers and administrative personnel at the hospitals                                  | 17987                                                                                                         | All ages                                    | Departments with limited patient contact                                           | No                 | Yes (17948/0/17987)                                                                                                             | -                                                                 |
| Ladhani et al., 2020         | London, UK                      | May 2020                          | Longitudinal study    | Residents in care homes<br>Staffs in care homes                                                   | Residents in care homes: 118;<br>Staffs in care homes: 164                                                    | Older than 18 years old                     | -                                                                                  | Yes                | Yes (Residents in care homes: 118/unk /118; Staffs in care homes: 164/unk/164)                                                  | -                                                                 |
| Yogo et al., 2020            | California, USA                 | May 2020                          | Cross-sectional study | High-Risk Healthcare Workers                                                                      | 1554                                                                                                          | Older than 18 years old                     | Direct contact to patients with COVID-19 and those working in congregate care area | Yes                | Yes (1554/0/1554)                                                                                                               | -                                                                 |
| Santos-Hövenner et al., 2020 | Kupferzell, Germany             | May 2020                          | Cross-sectional study | Kupferzell residents                                                                              | 2203                                                                                                          | Older than 18 years old                     | -                                                                                  | Yes                | Yes (2203/0/2203)                                                                                                               | -                                                                 |
| Alserehi et al., 2020        | Saudi Arabia                    | May 2020                          | Cross-sectional study | Healthcare workers in COVID-19 referral hospitals;<br>Healthcare workers in nonaffected hospitals | Healthcare workers in COVID-19 referral hospitals: 9379;<br>Healthcare workers in nonaffected hospitals: 3242 | -                                           | -                                                                                  | No                 | Yes (Healthcare workers in COVID-19 referral hospitals: 9379/0/9379; Healthcare workers in nonaffected hospitals : 3242/0/3242) | -                                                                 |

| Reference                  | Location (country)         | Study period (starting timepoint) | Study type            | Study population                                    | No. of participants | Age of participants (Median, range/mean±SD) | Exposures                                                                                                                              | Symptom assessment          | Serology collected (No. of single serum/paired sera/participants) | Comment                                                                                           |
|----------------------------|----------------------------|-----------------------------------|-----------------------|-----------------------------------------------------|---------------------|---------------------------------------------|----------------------------------------------------------------------------------------------------------------------------------------|-----------------------------|-------------------------------------------------------------------|---------------------------------------------------------------------------------------------------|
| Alali et al., 2020         | Kuwait                     | May 2020                          | Cross-sectional study | Migrant workers                                     | 525                 | Mean: 43 years old                          | -                                                                                                                                      | Yes                         | Yes (673/0/673)                                                   | -                                                                                                 |
| Del Brutto et al., 2020    | Atahualpa, Ecuador         | May 2020                          | Cross-sectional study | Inhabitants in Atahualpa                            | 673                 | 59.2±12.8 years old                         | -                                                                                                                                      | Yes                         | Yes (673/0/673)                                                   | -                                                                                                 |
| Blairon et al., 2020       | Belgium                    | May 2020                          | Cross-sectional study | Healthcare worker                                   | 1485                | -                                           | 215 workers (14.3%) reported having a function with no contact with patients while 1138 (75.9%) have had regular or occasional contact | Yes                         | Yes (1485/0/1485)                                                 | The usage of PPE was not reported.                                                                |
| Noh et al., 2020           | Southwestern Seoul, Korea  | May 2020                          | Cross-sectional study | Outpatients                                         | 1500                | 0-92 years old                              | -                                                                                                                                      | No                          | Yes (1500/0/1500)                                                 | -                                                                                                 |
| Ho et al., 2020            | Taiwan, China              | May 2020                          | Cross-sectional study | Outpatients and emergency department patients       | 14765               | Older than 20 years old                     | -                                                                                                                                      | No                          | Yes (Period 1: (9777/0/9777), Period 2: (4988/0/4988))            | -                                                                                                 |
| Murakami et al., 2020      | Washington, USA            | May 2020                          | Cross-sectional study | Emergency department healthcare providers           | 138                 | Median: 35 years old                        | -                                                                                                                                      | Yes                         | Yes (138/0/138)                                                   | -                                                                                                 |
| Lidström et al., 2020      | North of Stockholm, Sweden | May 2020                          | Cross-sectional study | Healthcare staff                                    | 8679                | 18-85 years old                             | -                                                                                                                                      | Yes (All were asymptomatic) | Yes (8679/0/8679)                                                 | -                                                                                                 |
| Haizler-Cohen et al., 2020 | New York state, USA        | May 2020                          | Cross-sectional study | Pregnant women                                      | 1671                | -                                           | -                                                                                                                                      | No                          | Yes (1671/0/1671)                                                 | -                                                                                                 |
| Martin et al., 2020        | Leicester, UK              | May 2020                          | Cross-sectional study | Hospital staff                                      | 10662               | 44 (33-53) years old                        | -                                                                                                                                      | No                          | Yes (10662/0/10662)                                               | -                                                                                                 |
| Black et al., 2020         | Leicester, UK              | May 2020                          | Cross-sectional study | Co-workers at a UK renal transplant centre          | 200                 | 45.3±12.0 years old                         | -                                                                                                                                      | Yes                         | Yes (200/0/200)                                                   | -                                                                                                 |
| Kassem et al., 2020        | Egypt                      | June 2020                         | Cross-sectional study | Healthcare workers employed in the gastroenterology | 74                  | Median: 32 years old                        | -                                                                                                                                      | Yes                         | Yes (74/0/74)                                                     | Strict regulations on the use of personal protective                                              |
| Hibino et al., 2020        | Kanagawa, Japan            | June 2020                         | Cross-sectional study | Medical staff                                       | 806                 | 33 (21-83) years old                        | 136 staff members had direct contact with COVID-19 patients                                                                            | Yes                         | Yes (806/0/806)                                                   | Direct contact with COVID-19 patients while equipped with standard personal protective equipment. |
| Prendecki et al., 2020     | England, UK                | June 2020                         | Cross-sectional study | Kidney transplant recipients                        | 855                 | 57 (45-66) years old                        | -                                                                                                                                      | No                          | Yes (855/0/855)                                                   | -                                                                                                 |
| Nsn et al., 2020           | UK                         | June 2020                         | Cross-sectional study | Nursing home residents                              | 241                 | -                                           | -                                                                                                                                      | Yes                         | Yes (241/0/241)                                                   | -                                                                                                 |

| Reference                | Location (country)                                                                     | Study period (starting timepoint) | Study type            | Study population                                          | No. of participants                                   | Age of participants (Median, range/mean±SD)                                                           | Exposures                                                                                                                                                                                                                               | Symptom assessment | Serology collected (No. of single serum/paired sera/participants)             | Comment                                                                                                                                                                                                                                                                                                                         |
|--------------------------|----------------------------------------------------------------------------------------|-----------------------------------|-----------------------|-----------------------------------------------------------|-------------------------------------------------------|-------------------------------------------------------------------------------------------------------|-----------------------------------------------------------------------------------------------------------------------------------------------------------------------------------------------------------------------------------------|--------------------|-------------------------------------------------------------------------------|---------------------------------------------------------------------------------------------------------------------------------------------------------------------------------------------------------------------------------------------------------------------------------------------------------------------------------|
| Abdelmoniem et al., 2020 | Cairo, Egypt                                                                           | June 2020                         | Cross-sectional study | Frontline healthcare workers                              | 203                                                   | 31.9±6.6 years old                                                                                    | -                                                                                                                                                                                                                                       | Yes                | Yes (203/0/203)                                                               | -                                                                                                                                                                                                                                                                                                                               |
| Pedersen et al., 2020    | The Danish Capital Region, the Zealand Region, and the Central Denmark Region, Denmark | June 2020                         | Cross-sectional study | Retired blood donors; Active blood donors                 | Retired blood donors: 1201; Active blood donors: 1110 | Retired blood donors: median (IQR): 73 (71-76) years old; Active blood donors: range: 18-69 years old | -                                                                                                                                                                                                                                       | Yes                | Yes (Retired blood donors: (1201/0/1201), Active blood donors: (1110/0/1110)) | -                                                                                                                                                                                                                                                                                                                               |
| Dimcheff et al., 2020    | Michigan and Ohio, USA                                                                 | June 2020                         | Cross-sectional study | Employees of a Veterans Affairs Healthcare System         | 1476                                                  | Older than 18 years old                                                                               | An exposure was defined as close contact (within six feet) with an individual with confirmed COVID-19 for greater than 15 minutes with the example being exposed to a family member at home who has had a positive COVID-19 nasal swab. | Yes                | Yes (1476/0/1476)                                                             | All personnel who worked on the COVID-19 wards were provided powered air purifying respirators (PAPRs) or N95 respirators along with personal protective equipment (PPE) that consisted of face shields, gowns, and gloves according to Centers for Disease Control and Prevention (CDC) recommendations in the Winter of 2020. |
| Mesnil et al., 2020      | Paris, France                                                                          | June 2020                         | Cross-sectional study | Hospital professionals                                    | 646                                                   | 39±11 years old                                                                                       | Working in COVID-19 unit                                                                                                                                                                                                                | No                 | Yes (646/0/646)                                                               | Personal protective equipment for healthcare workers (HCW) in contact with COVID-19 patients (surgical or FFP2 masks for respiratory protection, disposable gown and protective goggles), use of High Efficiency Particulate Air filters (HEPA) for ventilators.                                                                |
| Insúa et al., 2020       | Buenos Aires, Argentina                                                                | June 2020                         | Cross-sectional study | Staff physicians and residents from a children's hospital | 116                                                   | 45.6±13.3 years old                                                                                   | -                                                                                                                                                                                                                                       | No                 | Yes (116/0/116)                                                               | -                                                                                                                                                                                                                                                                                                                               |
| Dimeglio et al., 2020    | Toulouse, France                                                                       | June 2020                         | Cross-sectional study | Healthcare workers                                        | 8758                                                  | 40 (32-50) years old                                                                                  | -                                                                                                                                                                                                                                       | Yes                | Yes (8758/0/8758)                                                             | -                                                                                                                                                                                                                                                                                                                               |
| Mahajan et al., 2020     | Connecticut, USA                                                                       | June 2020                         | Cross-sectional study | Community residents                                       | 567                                                   | 50.1±17.2 years old                                                                                   | -                                                                                                                                                                                                                                       | Yes                | Yes (567/0/567)                                                               | -                                                                                                                                                                                                                                                                                                                               |
| Dodd et al., 2020        | 44 states, USA                                                                         | June 2020                         | Cross-sectional study | Blood donors                                              | 160328                                                | Older than 16 years old                                                                               | -                                                                                                                                                                                                                                       | No                 | Yes (160328/0/160328)                                                         | -                                                                                                                                                                                                                                                                                                                               |



| Reference                 | Location (country)     | Study period (starting timepoint) | Study type            | Study population                              | No. of participants                                                                                                                                       | Age of participants (Median, range/mean±SD)                                               | Exposures | Symptom assessment | Serology collected (No. of single serum/paired sera/participants)                                                                                                                               | Comment |
|---------------------------|------------------------|-----------------------------------|-----------------------|-----------------------------------------------|-----------------------------------------------------------------------------------------------------------------------------------------------------------|-------------------------------------------------------------------------------------------|-----------|--------------------|-------------------------------------------------------------------------------------------------------------------------------------------------------------------------------------------------|---------|
| Martínez-Baz et al., 2020 | Pamplona, Spain        | June 2020                         | Cross-sectional study | Health Workers                                | 11201                                                                                                                                                     | Older than 18 years old                                                                   | -         | Yes                | Yes (8665/0/11201)                                                                                                                                                                              | -       |
| Anand et al., 2020        | USA                    | June 2020                         | Cross-sectional study | Adult patients receiving dialysis             | 31509                                                                                                                                                     | Older than 18 years old                                                                   | -         | No                 | Yes (28503/0/31509)                                                                                                                                                                             | -       |
| Lundkvist et al., 2020    | Stockholm, Sweden      | June 2020                         | Cross-sectional study | Residents in Norra Djurgårdsstaden and Tensta | Residents in Norra Djurgårdsstaden: 123<br>Residents in Tensta: 90                                                                                        | Mean: Residents in Norra Djurgårdsstaden: 37 years old; Residents in Tensta: 50 years old | -         | No                 | Yes (Residents in Norra Djurgårdsstaden): 123/0/123, Residents in Tensta: 90/0/90)                                                                                                              | -       |
| Younas et al., 2020       | Karachi, Pakistan      | June 2020                         | Cross-sectional study | Blood donors                                  | 370                                                                                                                                                       | 30.6±6.3 years old                                                                        | -         | No                 | Yes (370/0/370)                                                                                                                                                                                 | -       |
| Gujski et al., 2020       | Mazowieckie, Poland    | June 2020                         | Cross-sectional study | Police employees                              | 5802                                                                                                                                                      | Older than 20 years old                                                                   | -         | No                 | Yes (5082/0/5082)                                                                                                                                                                               | -       |
| Malani et al., 2020       | Mumbai, India          | June 2020                         | Cross-sectional study | Mumbai residents                              | Matunga Non-slums: 1183<br>Matunga Slums :2121<br>Chembur West Non-slums :941<br>Chembur West Slums: 1511<br>Dahisar Non-slums: 578<br>Dahisar Slums: 570 | All older than 12 years old                                                               | -         | No                 | Yes (Matunga Non-slums: 1183/0/1183; Matunga Slums :2121/0/2121; Chembur West Non-slums : 941/0/941; Chembur West Slums : 1511/0/1511; Dahisar Non-slums : 578/0/578; Dahisar Slums: 570/0/570) | -       |
| Khan et al., 2020         | Kashmir, India         | June 2020                         | Cross-sectional study | Hospital visitors                             | 2923                                                                                                                                                      | Older than 18 years old                                                                   | -         | Yes                | Yes (2906/0/2923)                                                                                                                                                                               | -       |
| Pray et al., 2020         | Wisconsin, USA         | June 2020                         | Cross-sectional study | Summer school retreat attendees               | 152                                                                                                                                                       | Range: 14-45 years old                                                                    | -         | Yes                | Yes (148/0/152)                                                                                                                                                                                 | -       |
| Bloomfield et al., 2020   | Prague, Czech Republic | July 2020                         | Cross-sectional study | General pediatric patients                    | 200                                                                                                                                                       | Range: 0-18 years old                                                                     | -         | Yes                | Yes (200/0/200)                                                                                                                                                                                 | -       |
| Kumar et al., 2020        | Kerala, India          | July 2020                         | Cross-sectional study | healthcare workers                            | 635                                                                                                                                                       | Mean (range): 34.8 (19-70) years old                                                      | -         | Yes                | Yes (635/0/635)                                                                                                                                                                                 | -       |

| Reference                   | Location (country)        | Study period (starting timepoint) | Study type            | Study population                                                                 | No. of participants                                                                                              | Age of participants (Median, range/mean±SD)                                                                                                         | Exposures                                                     | Symptom assessment | Serology collected (No. of single serum/paired sera/participants)                                                                  | Comment |
|-----------------------------|---------------------------|-----------------------------------|-----------------------|----------------------------------------------------------------------------------|------------------------------------------------------------------------------------------------------------------|-----------------------------------------------------------------------------------------------------------------------------------------------------|---------------------------------------------------------------|--------------------|------------------------------------------------------------------------------------------------------------------------------------|---------|
| Noor et al., 2020           | Peshawar, Pakistan        | July 2020                         | Cross-sectional study | Healthcare workers                                                               | Healthcare worker in COVID-19 receiving hospital: 439; Healthcare worker in non-COVID-19 receiving hospital: 572 | Healthcare worker in COVID-19 receiving hospital: 33.25±8.71 years old; Healthcare worker in non-COVID-19 receiving hospital: 33.94±11.77 years old | -                                                             | No                 | Yes (Healthcare worker in COVID-19 receiving hospital: 439/0/439; Healthcare worker in non-COVID-19 receiving hospital: 572/0/572) | -       |
| Yamaki et al., 2020         | California, USA           | July 2020                         | Cross-sectional study | Patients who had visited an affiliated outpatient clinic or emergency department | 992                                                                                                              | Older than 10 years old                                                                                                                             | -                                                             | No                 | Yes (865/0/992)                                                                                                                    | -       |
| Bajema et al., 2020         | USA                       | July 2020                         | Cross-sectional study | Residual sera from commercial labs                                               | 177919                                                                                                           | -                                                                                                                                                   | -                                                             | No                 | Yes (177919/0/177919)                                                                                                              | -       |
| Godbout et al., 2020        | Virginia, USA             | July 2020                         | Cross-sectional study | Healthcare workers                                                               | 1962                                                                                                             | 19-75 years old                                                                                                                                     | Provided direct care to COVID-19 patient                      | Yes                | Yes (1962/0/1962)                                                                                                                  | -       |
| Silva et al., 2020          | Maranhão, Brazil          | July 2020                         | Cross-sectional study | Residents                                                                        | 3289                                                                                                             | All ages                                                                                                                                            | -                                                             | Yes                | Yes (3289/0/3156)                                                                                                                  | -       |
| Kumar et al., 2020          | Mumbai, India             | Aug 2020                          | Cross-sectional study | HCWs from designated COVID-19 hospitals; HCWs from Non-COVID-19 hospitals        | HCWs from designated COVID-19 hospitals: 401; HCWs from Non-COVID-19 hospitals: 400                              | Older than 20 years old                                                                                                                             | -                                                             | Yes                | Yes (HCWs from designated COVID-19 hospitals: 401/0/401; HCWs from Non-COVID-19 hospitals: 400/0/400)                              | -       |
| Chau et al., 2020           | Ho Chi Minh City, Vietnam | Aug 2020                          | Cross-sectional study | Health care workers of a tertiary referral hospital                              | 408                                                                                                              | Mean (range): 32 (20-60) years old                                                                                                                  | Caring for COVID-19 patients or conducting SARS-CoV-2 testing | No                 | Yes (408/0/408)                                                                                                                    | -       |
| Preprint database           |                           |                                   |                       |                                                                                  |                                                                                                                  |                                                                                                                                                     |                                                               |                    |                                                                                                                                    |         |
| Sughayer et al., 2020       | Amman, Jordan             | Jan 2020                          | Cross-sectional study | Healthy blood donors                                                             | 746                                                                                                              | 18-63 years old                                                                                                                                     | Poorly-defined exposures                                      | Yes                | Yes (746/0/746)                                                                                                                    | -       |
| Germain et al., 2020        | France                    | Jan 2020                          | Cross-sectional study | Tissue donors                                                                    | 144                                                                                                              | Median (IQR): 68 (57-79) years old                                                                                                                  | -                                                             | No                 | Yes (144/0/144)                                                                                                                    | -       |
| Martinez-Acuña et al., 2020 | Nuevo Leon, Mexico        | Jan 2020                          | Cross-sectional study | Blood donors                                                                     | 1968                                                                                                             | Median (IQR): 34.8 (18-65) years old                                                                                                                | -                                                             | Yes                | Yes (1931/0/1968)                                                                                                                  | -       |
| McCulloch et al., 2020      | Washington, USA           | Jan 2020                          | Cross-sectional study | Inpatients and outpatients who underwent routine screening                       | 916                                                                                                              | Median (IQR): 45 (32.5-60) years old                                                                                                                | -                                                             | No                 | Yes (916/0/916)                                                                                                                    | -       |

| Reference             | Location (country)             | Study period (starting timepoint) | Study type            | Study population                                                | No. of participants                                                                             | Age of participants (Median, range/mean±SD)                                                                                                               | Exposures                                                                                                                                                                                                        | Symptom assessment          | Serology collected (No. of single serum/paired sera/participants)                                    | Comment                                                                                                                 |
|-----------------------|--------------------------------|-----------------------------------|-----------------------|-----------------------------------------------------------------|-------------------------------------------------------------------------------------------------|-----------------------------------------------------------------------------------------------------------------------------------------------------------|------------------------------------------------------------------------------------------------------------------------------------------------------------------------------------------------------------------|-----------------------------|------------------------------------------------------------------------------------------------------|-------------------------------------------------------------------------------------------------------------------------|
| Chang et al., 2020    | Hubei, Hebei, Guangdong, China | Jan 2020;                         | Cross-sectional study | Blood donors                                                    | Wuhan, Hubei, China: 17794; Shijiazhuang, Hebei, China: 13540; Shenzhen, Guangdong, China: 6810 | Wuhan, Hubei, China: 33 (IQR 19-47) years old; Shijiazhuang, Hebei, China: 40 (IQR 33-48) years old; Shenzhen, Guangdong, China: 36 (IQR 19-53) years old | Poorly-defined exposures                                                                                                                                                                                         | Yes                         | Yes (Wuhan, Hubei, China: 17794/0/17794; Hebei, China: 13540/0/13540; Guangdong, China: 6810/0/6810) | -                                                                                                                       |
| Li et al., 2020       | Shanghai, China                | Feb 2020                          | Cross-sectional study | Individuals with different ocular diseases                      | 1331                                                                                            | Median (IQR): 58 (36-68) years old                                                                                                                        | -                                                                                                                                                                                                                | No                          | Yes (1331/0/1331)                                                                                    | -                                                                                                                       |
| Xiong et al., 2020    | Wuhan, Hubei, China            | Feb 2020                          | Longitudinal study    | Healthcare workers with intensive exposure to COVID-19 patients | 797                                                                                             | 31 (23-53) years old                                                                                                                                      | Close contact with COVID-19 patients                                                                                                                                                                             | Yes (All were asymptomatic) | Yes (785/12/797)                                                                                     | Among infected healthcare workers: 15 of 35 dressed in full PPE, and 16 worn N95 mask and gown                          |
| Valenti et al., 2020  | Milan, Italy                   | Feb 2020                          | Cross-sectional study | Blood donors                                                    | 789                                                                                             | 18-70 years old                                                                                                                                           | -                                                                                                                                                                                                                | Yes                         | Yes (789/0/789)                                                                                      | -                                                                                                                       |
| Yu et al., 2020       | Hubei, China                   | Feb 2020                          | Cross-sectional study | Health Care Workers                                             | 1184                                                                                            | 33 (20-68) years old                                                                                                                                      | Contact with confirmed COVID-19 patient                                                                                                                                                                          | Yes                         | Yes (337/0/1184)                                                                                     | All HCWs were requested to strictly followed the requirements of hand hygiene and proper personal protective equipment. |
| Kuwelker et al., 2020 | Bergen, Norway                 | Feb 2020                          | Cross-sectional study | Household members of confirmed cases                            | 179                                                                                             | 33±19 years old                                                                                                                                           | -                                                                                                                                                                                                                | Yes                         | Yes (179/0/179)                                                                                      | -                                                                                                                       |
| Liu et al., 2020      | Wuhan, Hubei, China            | Feb 2020                          | Cross-sectional study | Healthcare providers; general workers; other patients           | Healthcare providers: 3832; general workers: 19555; other patients: 1616                        | Mean age: Healthcare providers: 37.1 years old; general workers: 41.6 years old; other patients: 53.3 years old                                           | Most of the healthcare providers were exposed to SARS-CoV-2 during the first few months of the outbreak when use of personal protection equipment was sparse as person-to-person transmission was not suspected; | No                          | Yes (Healthcare providers: 3832/0/3832, general workers: 19555/0/19555, other patients: 1616/0/1616) | -                                                                                                                       |
| Kamath et al., 2020   | New York State, USA            | Mar 2020                          | Cross-sectional study | Healthy blood donors                                            | 1559                                                                                            | 17-80 years old                                                                                                                                           | -                                                                                                                                                                                                                | No                          | Yes (1559/0/1559)                                                                                    | -                                                                                                                       |
| Santana et al., 2020  | São Paulo, Brazil              | Mar 2020                          | Longitudinal study    | Patients on disease-modifying anti-rheumatic drugs              | 100                                                                                             | Median: 46.5 (14.2) years old                                                                                                                             | -                                                                                                                                                                                                                | Yes                         | Yes (6/94/100)                                                                                       | -                                                                                                                       |

| Reference               | Location (country)       | Study period (starting timepoint) | Study type            | Study population                                                               | No. of participants                                                                        | Age of participants (Median, range/mean±SD)             | Exposures                                                                             | Symptom assessment | Serology collected (No. of single serum/paired sera/participants)                                                                                                              | Comment                                                                         |
|-------------------------|--------------------------|-----------------------------------|-----------------------|--------------------------------------------------------------------------------|--------------------------------------------------------------------------------------------|---------------------------------------------------------|---------------------------------------------------------------------------------------|--------------------|--------------------------------------------------------------------------------------------------------------------------------------------------------------------------------|---------------------------------------------------------------------------------|
| Tubiana et al., 2020    | Paris, France            | Mar 2020                          | Longitudinal study    | Healthcare workers                                                             | 154                                                                                        | Median (IQR): 35 (29.0-46.8) years old                  | Exposed to COVID-19 index                                                             | No                 | Yes (147/0/154)                                                                                                                                                                | -                                                                               |
| Skowronski et al., 2020 | British Columbia, Canada | Mar 2020                          | Cross-sectional study | Anonymized residual sera were obtained from patients                           | Mar 2020: 870; May 2020: 889                                                               | Median: 45 years old                                    | Poorly-defined exposures                                                              | No                 | Yes (Mar 2020: 869/0/870; May 2020: 885/0/889)                                                                                                                                 | -                                                                               |
| Vu et al., 2020         | France                   | Mar 2020                          | Cross-sectional study | Individuals undergoing routine diagnosis                                       | Mar: 3834<br>Apr: 3595<br>May: 3592                                                        | All ages                                                | -                                                                                     | No                 | Yes (Mar:3834/0/3834; Apr:3595/0/3595; May:3592/0/3592)                                                                                                                        | -                                                                               |
| Dietrich et al., 2020   | Louisiana, USA           | Mar 2020                          | Cohort study          | Children from a Children's Hospital                                            | 812                                                                                        | Median (IQR): 11 (4-15) years old                       | -                                                                                     | No                 | Yes (68/744/812)                                                                                                                                                               | -                                                                               |
| Brehm et al., 2020      | Hamburg, Germany         | Mar 2020                          | Longitudinal study    | Health care workers; non-health care workers                                   | Health care workers: 1026; non-health care workers: 227                                    | Mean (range): 38.4 (16-69) years old                    | Health care workers: Contact to covid-19 cases                                        | Yes                | Yes (Health care workers: 1026/0/1026, non-health care workers: 227/0/227)                                                                                                     | -                                                                               |
| Tang et al., 2020       | Wuhan, Hubei, China      | Mar 2020                          | Cross-sectional study | Outpatients in Zhongnan Hospital, Wuhan University                             | 2952                                                                                       | All ages                                                | -                                                                                     | Yes                | Yes (2952/0/2952)                                                                                                                                                              | -                                                                               |
| Augusto et al., 2020    | London, UK               | Mar 2020                          | Cross-sectional study | healthcare workers                                                             | 400                                                                                        | 36.7 (10.4) years old                                   | Contact with confirmed COVID-19 patient, Contact with confirmed COVID-19 colleague.   | Yes                | Yes (385/0/400)                                                                                                                                                                | -                                                                               |
| Wang et al., 2020       | Anhui, China             | Mar 2020                          | Cross-sectional study | Healthcare workers deployed to Wuhan; Healthcare workers who remained in Hefei | Healthcare workers deployed to Wuhan: 142<br>Healthcare workers who remained in Hefei: 284 | Over 20 years old                                       | Provided care for patients with COVID-19.                                             | No                 | Yes (Healthcare workers deployed to Wuhan: 142/0/142; Healthcare workers who remained in Hefei: 284/0/284)                                                                     | Healthcare workers deployed to Wuhan were provided with adequate supply of PPE. |
| Ling et al., 2020       | Wuhan, Hubei, China      | Mar 2020                          | Cross-sectional study | Persons experiencing back-to-work medical examinations                         | 18721                                                                                      | 40 (42-50) years old                                    | -                                                                                     | Yes                | Yes (18391/0/18721)                                                                                                                                                            | -                                                                               |
| Paradiso et al., 2020   | Bari, Italy              | Mar 2020                          | Longitudinal study    | Healthcare worker                                                              | 606                                                                                        | 47 (20-73) years old                                    | Direct contact with individuals with suspected COVID-19 disease in the last two weeks | Yes                | Yes (213/393/606)                                                                                                                                                              | -                                                                               |
| Herzog et al., 2020     | Belgium                  | Mar 2020                          | Cross-sectional study | Persons with blood samples collected from clinical lab                         | Period 1: 3910<br>Period 2: 3397<br>Period 3: 3242<br>Period 4: 2960<br>Period 5: 3023     | Mean: 55 years old<br>Mean: 49 years old<br>-<br>-<br>- | -                                                                                     | No                 | Yes (Collection period 1: 3910/0/3910, Collection period 2: 3397/0/3397, Collection period 3: 3242/0/3242, Collection period 4: 2960/0/2960, Collection period 5: 3023/0/3023) | -                                                                               |

| Reference             | Location (country)  | Study period (starting timepoint) | Study type            | Study population                                                                           | No. of participants                                                                                  | Age of participants (Median, range/mean±SD) | Exposures                                 | Symptom assessment | Serology collected (No. of single serum/paired sera/participants)                                                      | Comment                                                                                                                                            |
|-----------------------|---------------------|-----------------------------------|-----------------------|--------------------------------------------------------------------------------------------|------------------------------------------------------------------------------------------------------|---------------------------------------------|-------------------------------------------|--------------------|------------------------------------------------------------------------------------------------------------------------|----------------------------------------------------------------------------------------------------------------------------------------------------|
| Dopico et al., 2020   | Stockholm, Sweden   | Mar 2020                          | Cross-sectional study | Blood donor and pregnant women                                                             | 1900                                                                                                 | -                                           | -                                         | No                 | Yes (1900/0/1900)                                                                                                      | -                                                                                                                                                  |
| Streeck et al., 2020  | Heinsberg, Germany  | Mar 2020                          | Cross-sectional study | Local inhabitants                                                                          | 1007                                                                                                 | 53 (1-90) years old                         | -                                         | Yes                | Yes (919/0/1007)                                                                                                       | -                                                                                                                                                  |
| Doi et al., 2020      | Kobe, Japan         | Mar 2020                          | Cross-sectional study | Patients who visited outpatient clinics with blood samples                                 | 1000                                                                                                 | All ages                                    | -                                         | No                 | Yes (1000/0/1000)                                                                                                      | -                                                                                                                                                  |
| Tosato et al., 2020   | Italy               | Apr 2020                          | Cross-sectional study | Healthcare professionals                                                                   | 133                                                                                                  | 51 (39-55) years old                        | -                                         | Yes                | Yes (133/0/133)                                                                                                        | PPE together with social distancing and preventive hygiene measures were applied by all our staff since the spread of the pandemic in our country. |
| Carozzi et al., 2020  | Tuscany, Italy      | Apr 2020                          | Cross-sectional study | Health care workers                                                                        | 17098                                                                                                | -                                           | -                                         | Yes                | Yes (17098/0/17098)                                                                                                    | -                                                                                                                                                  |
| Siddiqui et al., 2020 | New Delhi, India    | Apr 2020                          | Longitudinal study    | Staff of a tertiary care hospital; individuals visiting that hospital for COVID-19 testing | Staff of a tertiary care hospital: 448; individuals visiting that hospital for COVID-19 testing: 332 | Older than 18 years old                     | Contact with symptomatic/suspected person | Yes                | Yes (Staff of a tertiary care hospital: 448/0/448, individuals visiting that hospital for COVID-19 testing: 332/0/332) | -                                                                                                                                                  |
| Davis et al., 2020    | England, UK         | Apr 2020                          | Longitudinal study    | Staff and postgraduate students                                                            | 2807                                                                                                 | Mean: 37 years old                          | -                                         | Yes                | Yes (1882/0/2807)                                                                                                      | -                                                                                                                                                  |
| Kammon et al., 2020   | Alzintan, Libya     | Apr 2020                          | Cross-sectional study | Community residents; Healthcare workers                                                    | 142 community residents; 77 healthcare workers:                                                      | All ages                                    | -                                         | Yes                | Yes (Community residents: 142/0/142; Healthcare workers: 77/0/77)                                                      | The healthcare workers took effective protection measures while dealing with patients                                                              |
| Wagner et al., 2020   | Vienna, Austria     | Apr 2020                          | Longitudinal study    | working adults                                                                             | 1655                                                                                                 | Older than 15 years old                     | -                                         | Yes                | Yes (1655/unk/1655)                                                                                                    | -                                                                                                                                                  |
| Bendavid et al., 2020 | California, USA     | Apr 2020                          | Cross-sectional study | Local residents                                                                            | 3439                                                                                                 | All ages                                    | -                                         | Yes                | Yes (3330/0/3439)                                                                                                      | -                                                                                                                                                  |
| Egerup et al., 2020   | Copenhagen, Denmark | Apr 2020                          | Cross-sectional study | Parturient women; partners of parturient women; newborns                                   | Parturient women: 1361; partners of parturient women: 1236; newborns: 1342                           | -                                           | -                                         | Yes                | Yes (Parturient women: 1313/0/1361, partners of parturient women: 1189/0/1236, newborns: 1206/0/1342)                  | -                                                                                                                                                  |
| Krähling et al., 2020 | Frankfurt, Germany  | Apr 2020                          | Cross-sectional study | Employees in the Frankfurt metropolitan area                                               | 1000                                                                                                 | 18-65 years old                             | -                                         | Yes                | Yes (1000/0/1000)                                                                                                      | -                                                                                                                                                  |

| Reference               | Location (country)  | Study period (starting timepoint) | Study type            | Study population                                                                                                          | No. of participants                                                               | Age of participants (Median, range/mean±SD)                                                                                                       | Exposures                                                                                                                                                                | Symptom assessment | Serology collected (No. of single serum/paired sera/participants)                                 | Comment                                                                           |
|-------------------------|---------------------|-----------------------------------|-----------------------|---------------------------------------------------------------------------------------------------------------------------|-----------------------------------------------------------------------------------|---------------------------------------------------------------------------------------------------------------------------------------------------|--------------------------------------------------------------------------------------------------------------------------------------------------------------------------|--------------------|---------------------------------------------------------------------------------------------------|-----------------------------------------------------------------------------------|
| Richard et al., 2020    | Geneva, Switzerland | Apr 2020                          | cross-sectional study | general population                                                                                                        | 8344;                                                                             | Median (IQR): 46.9 (5 - 94) years old                                                                                                             | -                                                                                                                                                                        | Yes                | Yes (8344/0/8344)                                                                                 | -                                                                                 |
| Nopsopon et al., 2020   | Thailand            | Apr 2020                          | Cross-sectional study | Hospital staff; patients who needed procedural treatment or operation                                                     | Hospital staff: 675<br>patients who needed procedural treatment or operation: 182 | Hospital staff: median (IQR): 36.5 (28-45) years old<br>patients who needed procedural treatment or operation: median (IQR): 37 (25-53) years old | Some of the hospital staff and patients have the history of travel to high risk area and of close contact confirmed case                                                 | Yes                | Yes (Hospital staff: 675/0/675, patients who needed procedural treatment or operation: 182/0/182) | -                                                                                 |
| Leidner et al., 2020    | Oregon, USA         | Apr 2020                          | Longitudinal study    | Healthcare workers                                                                                                        | 10019                                                                             | 42 (18-82) years old                                                                                                                              | Direct patient contact, contact with patient biospecimens or patient linens                                                                                              | Yes                | Yes (10019/0/10019)                                                                               | Rigorous enforcement of PPE                                                       |
| Halbrook et al., 2020   | California, USA     | Apr 2020                          | Cross-sectional study | Health system workers; first responders                                                                                   | Health system workers: 1108;<br>first responders: 679                             | Older than 18 years old                                                                                                                           | -                                                                                                                                                                        | Yes                | Yes (Health system workers: 1108/0/1108; first responders: 679/0/679)                             | -                                                                                 |
| Fujita et al., 2020     | Kyoto, Japan        | Apr 2020                          | Cross-sectional study | Healthcare workers                                                                                                        | 92                                                                                | Older than 20 years old                                                                                                                           | Treat suspected COVID-19 cases                                                                                                                                           | Yes                | Yes (92/0/92)                                                                                     | -                                                                                 |
| Bal et al., 2020        | Lyon, France        | Apr 2020                          | Cross-sectional study | Health care workers                                                                                                       | 252                                                                               | Median (IQR): 35.9 (27.5-47) years old                                                                                                            | -                                                                                                                                                                        | Yes                | Yes (190/0/252)                                                                                   | -                                                                                 |
| Psichogiou et al., 2020 | Greece              | Apr 2020                          | Cross-sectional study | Healthcare workers from two hospitals (Hospital-1 was involved in the care of COVID-19 patients while hospital-2 was not) | Hospital-1 HCWs: 906<br>Hospital-2 HCWs: 589                                      | Older than 18 years old                                                                                                                           | First-line health care workers (FL-HCWs), defined as personnel whose activities involve contact with patients.                                                           | Yes                | Yes (Hospital-1 HCWs: 906/0/906, hospital-2 HCWs: 589/0/589)                                      | Only suboptimal use of personal protective equipment was noted in both hospitals. |
| Thomas et al., 2020     | Minnesota, USA      | Apr 2020                          | Cross-sectional study | Health Care Workers; Asymptomatic outpatients                                                                             | 1282<br>2379                                                                      | 49 (0.17-93) years old<br>41 (18-73) years old                                                                                                    | With confirmed and non-confirmed COVID-19 exposures ≥14 days prior<br>Potential COVID-19 exposures or history of prior symptoms consistent with COVID-19 ≥14 days prior. | Yes                | Yes (Health Care Workers:1282/0/1282; Asymptomatic outpatients:2379/0/2379)                       | -                                                                                 |

| Reference              | Location (country)     | Study period (starting timepoint) | Study type            | Study population                                             | No. of participants     | Age of participants (Median, range/mean±SD) | Exposures                                                                                                                                                                                                     | Symptom assessment | Serology collected (No. of single serum/paired sera/participants) | Comment                                                       |
|------------------------|------------------------|-----------------------------------|-----------------------|--------------------------------------------------------------|-------------------------|---------------------------------------------|---------------------------------------------------------------------------------------------------------------------------------------------------------------------------------------------------------------|--------------------|-------------------------------------------------------------------|---------------------------------------------------------------|
| Woon et al., 2020      | Klang Valley, Malaysia | Apr 2020                          | Cross-sectional study | Asymptomatic healthcare workers                              | 400                     | 34.9±7.8 years old                          | Close contact with infected patients; Prolonged face-to-face exposure with infected patients, Handled/contact with body fluids of infected patients, Contact with contaminated objects, contaminated surfaces | Yes                | Yes (400/0/400)                                                   | -                                                             |
| Cohen et al., 2020     | Paris, France          | Apr 2020                          | Cross-sectional study | Children consulting an ambulatory pediatrician               | 605                     | 4.9±3.9 years old                           | Contact with confirmed/ suspected COVID-19                                                                                                                                                                    | Yes                | Yes (605/0/605)                                                   | 543 available contact data on 605 enrolled patients           |
| Sikora et al., 2020    | UK                     | Apr 2020                          | Cross-sectional study | Cancer centre staff                                          | 161                     | Mean: 43 years old                          | -                                                                                                                                                                                                             | No                 | Yes (161/0/161)                                                   | -                                                             |
| Galán et al., 2020     | Madrid, Spain          | Apr 2020                          | Cross-sectional study | Healthcare workers                                           | 2919                    | 43.8 ±11.1 years old                        | Direct contact with COVID-19 patients                                                                                                                                                                         | Yes                | Yes (2590/0/2919)                                                 | 27% of them without using appropriate PPE.                    |
| Garralda et al., 2020  | Madrid, Spain          | Apr 2020                          | Cross-sectional study | Health care workers                                          | 2439                    | mean (range): 42.1 (18-65) years old        | Unsafe contact or exposure to a confirmed case                                                                                                                                                                | Yes                | Yes (2439/0/2439)                                                 | Mandatory use of face mask inside hospital since Mar 13, 2020 |
| Erber et al., 2020     | Munich, German         | Apr 2020                          | Cross-sectional study | Clinical staff, non-clinical MRI staff, and medical students | 4604                    | Older than 18 years old                     | Patient facing role, Aerosol generating procedures, COVID-19 assigned area                                                                                                                                    | Yes                | Yes (4554/0/4604)                                                 | -                                                             |
| Garritsen et al., 2020 | Netherland             | Apr 2020                          | Longitudinal study    | Individuals that had experiencing symptoms                   | 7241                    | Median (IQR): 50(40-59) years old           | -                                                                                                                                                                                                             | Yes                | Yes (unk/unk/7241)                                                | -                                                             |
| Snoeck et al., 2020    | Luxembourg             | Apr 2020                          | Cohort study          | General population                                           | 1862                    | 47±15 years old and 18-84 years old         | -                                                                                                                                                                                                             | Yes                | Yes (1820/0/1862)                                                 | -                                                             |
| Comar et al., 2020     | Trieste, Italy         | Apr 2020                          | Cross-sectional study | Healthcare workers                                           | 727                     | 22-77 years old                             | -                                                                                                                                                                                                             | Yes                | Yes (727/0/727)                                                   | -                                                             |
| Nisar et al., 2020     | Karachi, Pakistan      | Apr 2020                          | Cross-sectional study | Households                                                   | April: 1000; June: 1004 | All ages                                    | -                                                                                                                                                                                                             | No                 | Yes (April: 1000/0/1000; June: 1004/0/1004)                       | -                                                             |
| Wang et al., 2020      | Beijing, China         | Apr 2020                          | Cross-sectional study | Communities residents                                        | 2184                    | 42.3±19.5 years old                         | -                                                                                                                                                                                                             | Yes                | Yes (2184/0/2184)                                                 | -                                                             |
| Lisandru et al., 2020  | Corsica, France        | Apr 2020                          | Cross-sectional study | Patients having carried out a blood analysis                 | 1973                    | Median (IQR): 52 (34-70) year               | -                                                                                                                                                                                                             | No                 | Yes (1973/0/1973)                                                 | -                                                             |

| Reference               | Location (country)          | Study period (starting timepoint) | Study type            | Study population                         | No. of participants | Age of participants (Median, range/mean±SD)          | Exposures                                                                                                                                                           | Symptom assessment | Serology collected (No. of single serum/paired sera/participants)    | Comment                                                                 |
|-------------------------|-----------------------------|-----------------------------------|-----------------------|------------------------------------------|---------------------|------------------------------------------------------|---------------------------------------------------------------------------------------------------------------------------------------------------------------------|--------------------|----------------------------------------------------------------------|-------------------------------------------------------------------------|
| Zou et al., 2020        | Atlanta, USA                | Apr 2020                          | Cross-sectional study | Local residents                          | 142                 | -                                                    | -                                                                                                                                                                   | No                 | Yes (127/0/142)                                                      | -                                                                       |
| Nopsopon et al., 2020   | Ranong, Thailand            | Apr 2020                          | Cross-sectional study | Hospital staff                           | 844                 | 42 (32-50) years old                                 | History of travel to the high-risk area was 2.5%, history of close contact PCR confirmed COVID-19 case was 2.0%, history of close contact suspected case was 38.1%. | Yes                | Yes (844/82/844);                                                    | -                                                                       |
| McDade et al., 2020     | USA                         | Apr 2020                          | Longitudinal study    | Household members of essential workers   | 202                 | Range: 18-70 years old                               | -                                                                                                                                                                   | Yes                | Yes (177/25/202)                                                     | -                                                                       |
| Baker et al., 2020      | Atlanta, USA                | Apr 2020                          | Cross-sectional study | Medical staff members                    | 10275               | -                                                    | Caring for COVID-19 positive patient(s), Community contact with confirmed/suspected positive individual(s)                                                          | Yes                | Yes (10275/0/10275)                                                  | -                                                                       |
| Appa et al., 2020       | California, USA             | Apr 2020                          | Cross-sectional study | Residents and county essential workers   | 1880                | Older than 4 years old                               | -                                                                                                                                                                   | Yes                | Yes (1810/0/1880)                                                    | -                                                                       |
| Baxendale et al., 2020  | Royal Papworth Hospital, UK | Apr 2020                          | Cross-sectional study | Medical staff                            | 500                 | Median (IQR): 42 (33-51) years old                   | Critical-care patient facing, non-critical-care patient facing                                                                                                      | Yes                | Yes (493/0/500)                                                      | -                                                                       |
| Elli et al., 2020       | Milan, Italy                | Apr 2020                          | Cross-sectional study | Celiac disease patients                  | 362                 | Age at enrolment 45±15 years, age at diagnosis 33±16 | -                                                                                                                                                                   | Yes                | Yes (109/0/362)                                                      | -                                                                       |
| Takita et al., 2020     | Tokyo, Japan                | May 2020                          | Cross-sectional study | Community residents                      | 1071                | All ages                                             | -                                                                                                                                                                   | Yes                | Yes (1071/0/1071)                                                    | -                                                                       |
| Tönshoff et al., 2020   | Baden-Württemberg, Germany  | Apr 2020                          | Cross-sectional study | Children and their parents               | 4964                | Children: 1-10 years old; Parents: 23-66 years old   | -                                                                                                                                                                   | Yes                | Yes (4964/0/4964)                                                    | -                                                                       |
| Mortgat et al., 2020    | Belgium                     | Apr 2020                          | Cross-sectional study | Healthcare worker                        | 699                 | Median: 39.5 years old                               | -                                                                                                                                                                   | Yes                | Yes (699/0/699)                                                      | -                                                                       |
| Jerković et al., 2020   | Croatia                     | Apr 2020                          | Cross-sectional study | Industry workers                         | 1494                | 46 (18-79) years old                                 | -                                                                                                                                                                   | Yes                | Yes (1494/0/1494)                                                    | -                                                                       |
| Alessandro et al., 2020 | Lombardy, Italy             | Apr 2020                          | Cross-sectional study | General population<br>Healthcare Workers | 1792<br>2415        | 44±16 years old<br>48±10 years old                   | Contacts with patients                                                                                                                                              | No                 | Yes (General population:1792/0/1792; Healthcare Workers:2415/0/2415) | PPE adopted since the beginning of the local spread of pandemic disease |



| Reference             | Location (country)                         | Study period (starting timepoint) | Study type            | Study population                                                  | No. of participants | Age of participants (Median, range/mean±SD)                                                                                                      | Exposures | Symptom assessment | Serology collected (No. of single serum/paired sera/participants) | Comment                                                                                        |
|-----------------------|--------------------------------------------|-----------------------------------|-----------------------|-------------------------------------------------------------------|---------------------|--------------------------------------------------------------------------------------------------------------------------------------------------|-----------|--------------------|-------------------------------------------------------------------|------------------------------------------------------------------------------------------------|
| Dillner et al., 2020  | Stockholm, Sweden                          | Apr 2020                          | Cross-sectional study | Healthy hospital employees                                        | 14057               | All ages                                                                                                                                         | -         | No                 | Yes (12928/0/14057)                                               | -                                                                                              |
| Alemu et al., 2020    | Addis Ababa, Ethiopia                      | Apr 2020                          | Cross-sectional study | Residents                                                         | 301                 | 30±10.9 years old                                                                                                                                | -         | No                 | Yes (301/0/301)                                                   | -                                                                                              |
| Aziz et al., 2020     | Bonn, Germany                              | Apr 2020                          | Cross-sectional study | Community residents                                               | 4771                | 30-100 years old                                                                                                                                 | -         | No                 | Yes (4755/0/4771)                                                 | -                                                                                              |
| Chamie et al., 2020   | San Francisco, USA                         | Apr 2020                          | Cross-sectional study | All residents (>4 years) and workers in census tract              | 3953                | Older than 4 years old                                                                                                                           | -         | Yes                | Yes (3861/0/3953)                                                 | -                                                                                              |
| Nesbitt et al., 2020  | Rhode Island, USA                          | Apr 2020                          | Cross-sectional study | Blood donor                                                       | 2008                | Median: 56 years old                                                                                                                             | -         | No                 | Yes (1996/0/2008)                                                 | -                                                                                              |
| Wells et al., 2020    | London & South-East England, UK            | Apr 2020                          | Cross-sectional study | Members of the Twins UK cohort                                    | 431                 | 48.38±28 years old                                                                                                                               | -         | Yes                | Yes (431/0/431)                                                   | -                                                                                              |
| Fontanet et al., 2020 | Paris, France                              | Apr 2020                          | Cross-sectional study | Pupils, their parents and relatives, and staff of primary schools | 1340                | The pupils: 6-11 years old;<br>Parents: 40 (37-44) years old;<br>Teachers: 47.5 (40-51) years old;<br>Non-teaching staff: 47.5 (32-54) years old | -         | Yes                | Yes (1340/0/1340)                                                 | -                                                                                              |
| Anna et al., 2020     | Paris, France                              | Apr 2020                          | Cross-sectional study | Institute Curie workers                                           | 1847                | Mean:38 years old;<br>Range:19-75 years old                                                                                                      | -         | Yes                | Yes (1847/0/1847)                                                 | -                                                                                              |
| Sandri et al., 2020   | Lombardy, Italy                            | Apr 2020                          | Cross-sectional study | Health care and administrative staff                              | 3985                | Median (IQR): 42 (21-86) years old                                                                                                               | -         | Yes                | Yes (3985/0/3985)                                                 | All of the personnel working in the emergency room or customer care had to wear obligatory PPE |
| Calife et al., 2020   | Baixada Santista metropolitan area, Brazil | -                                 | Cross-sectional study | Residents                                                         | 2342                | 37.78±19.98 years old                                                                                                                            | -         | No                 | Yes (2342/0/2342)                                                 | -                                                                                              |
| Brant et al., 2020    | California, USA                            | May 2020                          | Cross-sectional study | Health care workers                                               | 3013                | 42.62±12.12 years old                                                                                                                            | -         | No                 | Yes (2932/0/3013)                                                 | Appropriate PPE usage since January 2020                                                       |

| Reference                   | Location (country)                                   | Study period (starting timepoint) | Study type            | Study population                                                                                                       | No. of participants                                                                                                                     | Age of participants (Median, range/mean±SD)                                                                        | Exposures                                                                                                                        | Symptom assessment | Serology collected (No. of single serum/paired sera/participants)                                                                                           | Comment                                                     |
|-----------------------------|------------------------------------------------------|-----------------------------------|-----------------------|------------------------------------------------------------------------------------------------------------------------|-----------------------------------------------------------------------------------------------------------------------------------------|--------------------------------------------------------------------------------------------------------------------|----------------------------------------------------------------------------------------------------------------------------------|--------------------|-------------------------------------------------------------------------------------------------------------------------------------------------------------|-------------------------------------------------------------|
| Brant-Zawadzki et al., 2020 | Orange County, USA                                   | May 2020                          | Cross-sectional study | Health care workers<br>First responders                                                                                | Baseline: Health care workers 3458;<br>First responders 226;<br>Follow up: Health care workers 2754;<br>First responders 92             | Health care workers:<br>42.33±12.13 years old<br>First responders:<br>42.0±8.61 years old                          | -                                                                                                                                | Yes                | Yes (Health care workers (3458/2754/3458); First responders (226/92/226))                                                                                   | -                                                           |
| Jones et al., 2020          | England, UK                                          | May 2020                          | Cross-sectional study | HCWs and support staff                                                                                                 | 12254                                                                                                                                   | -                                                                                                                  | -                                                                                                                                | No                 | Yes (6858/0/12254)                                                                                                                                          | -                                                           |
| Li et al., 2020             | Shanghai, China                                      | May 2020                          | Cross-sectional study | Patients with ocular surface diseases;<br>Patients with no-ocular surface diseases;<br>Patients without ocular disease | Patients with ocular surface diseases: 330;<br>Patients with no-ocular surface diseases: 4614;<br>Patients without ocular disease: 1470 | -                                                                                                                  | -                                                                                                                                | No                 | Yes (Patients with ocular surface diseases: 330/0/330; Patients with no-ocular surface diseases: 4614/0/4614; Patients without ocular disease: 1470/0/1470) | -                                                           |
| Barallat et al., 2020       | Barcelona, Spain.                                    | May 2020                          | Cross-sectional study | Healthcare worker                                                                                                      | 7563                                                                                                                                    | 43.81±12.43 years old                                                                                              | Hospital admitted for COVID was low                                                                                              | Yes                | Yes (7563/0/7563)                                                                                                                                           | Recommend to continue to wear personal protective equipment |
| Tess et al., 2020           | São Paulo, Brazil                                    | May 2020                          | Cross-sectional study | Local inhabitants                                                                                                      | 517                                                                                                                                     | Older than 18 years old                                                                                            | -                                                                                                                                | Yes                | Yes (517/0/517)                                                                                                                                             | -                                                           |
| Mattern et al., 2020        | Paris, France                                        | May 2020                          | Cross-sectional study | All patients admitted to the delivery room                                                                             | 272                                                                                                                                     | Median (IQR): 31 (30.5-37) for seropositive individuals;<br>Median (IQR): 33 (29-36) for seronegative individuals; | -                                                                                                                                | Yes                | Yes (249/0/272)                                                                                                                                             | -                                                           |
| Carrat et al., 2020         | Ile-de-France, Grand Est, Nouvelle-Aquitaine, France | May 2020                          | Cross-sectional study | General adult population                                                                                               | 14628                                                                                                                                   | -                                                                                                                  | -                                                                                                                                | Yes                | Yes (14628/0/14628)                                                                                                                                         | -                                                           |
| Samore et al., 2020         | Utah, Salt Lake, Davis, and Summit, USA              | May 2020                          | Cross-sectional study | Community-representative participants                                                                                  | 8108                                                                                                                                    | Median (IQR): 44 (30-62) years old                                                                                 | -                                                                                                                                | No                 | Yes (8108/0/8108)                                                                                                                                           | -                                                           |
| Dupraz et al., 2020         | Vaud, Switzerland                                    | May 2020                          | Cross-sectional study | Household members;<br>Close contacts outside the household                                                             | Household members: 302;<br>Close contacts outside the household: 69                                                                     | Household members: 37±21.3 years old;<br>Close contacts outside the household: 47.8±17 years old                   | Household members: close contact with confirmed case;<br>Close contacts outside the household: close contact with confirmed case | Yes                | Yes (Household members: 302/0/302; Close contacts outside the household: 69/0/69)                                                                           | -                                                           |

| Reference                  | Location (country)                   | Study period (starting timepoint) | Study type            | Study population                                             | No. of participants                           | Age of participants (Median, range/mean±SD)     | Exposures                                                                                   | Symptom assessment | Serology collected (No. of single serum/paired sera/participants) | Comment |
|----------------------------|--------------------------------------|-----------------------------------|-----------------------|--------------------------------------------------------------|-----------------------------------------------|-------------------------------------------------|---------------------------------------------------------------------------------------------|--------------------|-------------------------------------------------------------------|---------|
| Royo-Cebrecos et al., 2020 | Andorra, Europe                      | May 2020                          | Cross-sectional study | Entire population in Andorra                                 | First survey: 70389;<br>Second survey: 63708; | Older than 2 years old                          |                                                                                             | Yes                | Yes (First survey: 70389/0/70389; Second survey: 63708/0/63708)   |         |
| McLaughlin et al., 2020    | Blaine County Idaho, USA             | May 2020                          | Cross-sectional study | Residents of Blaine County                                   | 917                                           | Older than 18 years old                         |                                                                                             | No                 | Yes (917/0/917)                                                   |         |
| Rauber et al., 2020        | Bundesland, Germany                  | May 2020                          | Cross-sectional study | Individuals undergone liver transplantation                  | 219                                           | 56.9 (18.1-78.2) years old                      |                                                                                             | Yes                | Yes (219/0/219)                                                   |         |
| McBride et al., 2020       | New York City, USA                   | May 2020                          | Cross-sectional study | Outpatients coming into the Department of Radiation Oncology | 919                                           | 62 (6-96) years old                             |                                                                                             | Yes                | Yes (919/0/919)                                                   |         |
| Jõgi et al., 2020          | Saaremaa and Tallinn county, Estonia | May 2020                          | Cross-sectional study | Participants consulted in general practitioners              | 1960                                          | All ages                                        |                                                                                             | Yes                | Yes (1960/0/1960)                                                 |         |
| Ebinger et al., 2020       | California, USA                      | May 2020                          | Cross-sectional study | Health Care Workers                                          | 6062                                          | All ages                                        | Regular contact with Covid-19 patients; work on a unit housing/caring for Covid-19 patients | Yes                | Yes (6062/0/6062)                                                 |         |
| Hurk et al., 2020          | Netherlands                          | May 2020                          | Cross-sectional study | Blood donor                                                  | 8275                                          | Range: 18-73 years old                          |                                                                                             | Yes                | Yes (7150/0/8275)                                                 |         |
| Hassan et al., 2020        | Stockholm, Sweden                    | May 2020                          | Cross-sectional study | Home care employees                                          | 405                                           | Median (IQR): 43 (32-44) years old              |                                                                                             | No                 | Yes (403/0/405)                                                   |         |
| Weis et al., 2020          | Jena, Germany                        | May 2020                          | Cross-sectional study | Community residents                                          | 626                                           | Adult: 58.1 years old, Children: 9.62 years old |                                                                                             | Yes                | Yes (620/0/626)                                                   |         |
| Rigatti et al., 2020       | USA                                  | May 2020                          | Cross-sectional study | Life insurance applicants                                    | 50025                                         | Median (IQR): 42 (34-54) years old              |                                                                                             | Yes                | Yes (50025/0/50025)                                               |         |
| Faniyi et al., 2020        | Birmingham NHS Foundation Trust, UK  | May 2020                          | Cross-sectional study | Health Care Workers                                          | 392                                           | Median (IQR): 41 (30-50) years old              |                                                                                             | Yes                | Yes (392/0/392)                                                   |         |
| Stout et al., 2020         | USA                                  | May 2020                          | Cross-sectional study | Life insurance applicants                                    | May: 18441<br>Jun: 31822<br>Sep: 63103        | Median (IQR): 42 (33-54) years old              |                                                                                             | Yes                | Yes (May:18441/0/18441; Jun:31822/0/31822; Sep:63103/0/63103)     |         |
| Gomes et al., 2020         | Espírito Santo, Brazil               | May 2020                          | Cross-sectional study | General population                                           | 4612                                          | All ages                                        |                                                                                             | Yes                | Yes (4608/0/4608)                                                 |         |

| Reference                | Location (country)        | Study period (starting timepoint) | Study type            | Study population                                   | No. of participants                                                                                                               | Age of participants (Median, range/mean±SD)                                                                          | Exposures                                                                 | Symptom assessment | Serology collected (No. of single serum/paired sera/participants)        | Comment                                                |
|--------------------------|---------------------------|-----------------------------------|-----------------------|----------------------------------------------------|-----------------------------------------------------------------------------------------------------------------------------------|----------------------------------------------------------------------------------------------------------------------|---------------------------------------------------------------------------|--------------------|--------------------------------------------------------------------------|--------------------------------------------------------|
| Wu et al., 2020          | Wuhan, Hubei, China       | May 2020                          | Cross-sectional study | People living with HIV; HIV-naïve residents        | People living with HIV: 857; HIV-naïve residents: 1048                                                                            | People living with HIV: 39.7±14.1 years old; HIV-naïve residents living in the Wuchang district: 47.4±14.2 years old |                                                                           | No                 | Yes (People living with HIV: 857/0/857; HIV-naïve resident: 1048/0/1048) |                                                        |
| Rebeiro et al., 2020     | Tennessee, USA            | May 2020                          | Cross-sectional study | health care workers                                | 11787                                                                                                                             | Older than 18 years old                                                                                              |                                                                           | No                 | Yes (11787/0/11787)                                                      |                                                        |
| Schubl et al., 2020      | California, USA           | May 2020                          | Cross-sectional study | healthcare worker                                  | 1557                                                                                                                              | Older than 18 years old                                                                                              | Known COVID-19 exposure at home and job-related exposure                  | Yes                | Yes (1557/0/1557)                                                        |                                                        |
| Majdoubi et al., 2020    | Greater Vancouver, Canada | May 2020                          | Cross-sectional study | Adult residents                                    | 276                                                                                                                               | 42.4±11.9 years old                                                                                                  |                                                                           | Yes                | Yes (276/0/276)                                                          |                                                        |
| Nakamura et al., 2020    | Iwate, Japan              | May 2020                          | Cross-sectional study | Healthcare workers                                 | 1000                                                                                                                              | 40±11 years old                                                                                                      |                                                                           | No                 | Yes (1000/0/1000)                                                        | No confirmed COVID-19 cases were reported in the local |
| Tsertsvadze et al., 2020 | Tbilisi, Georgia          | May 2020                          | Cross-sectional study | Adult residents of capital city of Tbilisi         | 1068                                                                                                                              | Older than 18 years old                                                                                              | Contact with suspected or confirmed case, History of international travel | Yes                | Yes (1068/0/1068)                                                        |                                                        |
| Reuben et al., 2020      | Washington, USA           | May 2020                          | Cross-sectional study | First responders                                   | 399                                                                                                                               | 42.55±9.07 years old                                                                                                 | Occupational exposure                                                     | Yes                | Yes (310/0/399)                                                          |                                                        |
| Bahrs et al., 2020       | Germany                   | May 2020                          | Cross-sectional study | Employees at a University Hospital                 | 660                                                                                                                               | Median (IQR): 40.5 (32.0-49.0) years old                                                                             |                                                                           | Yes                | Yes (660/0/660)                                                          | Mandatory masking since March                          |
| Chibwana et al., 2020    | Blantyre City, Malawi     | May 2020                          | Cross-sectional study | Health care workers                                | 500                                                                                                                               | 31 (20-64) years old                                                                                                 | Involved in clinical work related to COVID-19                             | Yes                | Yes (500/0/500)                                                          |                                                        |
| Laub et al., 2020        | Bavaria, Germany          | May 2020                          | Cross-sectional study | Children with pediatric multiorgan immune syndrome | 2934                                                                                                                              | Median (IQR): 7 (4-10) years old                                                                                     |                                                                           | Yes                | Yes (2932/0/2934)                                                        |                                                        |
| Armann et al., 2020      | Saxony, Germany           | May 2020                          | Longitudinal study    | Students and teachers                              | Students grade 8–11: 1538; Teachers: 507; 4 weeks after the end of the summer holidays: Students grade 8–11: 1334; Teachers: 445; | Median (IQR): Students grade 8–11: 15 (14-16) years old; Teachers: 51 (37-57) years old;                             |                                                                           | Yes                | Yes (Students grade 8–11: 204/1334/1538; Teachers: 62/445/507)           |                                                        |

| Reference                 | Location (country)           | Study period (starting timepoint) | Study type            | Study population                                                                  | No. of participants                                                                          | Age of participants (Median, range/mean±SD) | Exposures                                                                                                                          | Symptom assessment | Serology collected (No. of single serum/paired sera/participants)                                               | Comment                                                                                               |
|---------------------------|------------------------------|-----------------------------------|-----------------------|-----------------------------------------------------------------------------------|----------------------------------------------------------------------------------------------|---------------------------------------------|------------------------------------------------------------------------------------------------------------------------------------|--------------------|-----------------------------------------------------------------------------------------------------------------|-------------------------------------------------------------------------------------------------------|
| Hibino et al., 2020       | Tokyo, Japan                 | May 2020                          | Longitudinal study    | Healthy volunteers working for a Japanese company                                 | 650                                                                                          | Range: 19-69 years old                      | -                                                                                                                                  | No                 | Yes (350/0/650)                                                                                                 | -                                                                                                     |
| Barchuk et al., 2020      | Saint Petersburg, Russia     | May 2020                          | Cross-sectional study | Adults residents                                                                  | 1038                                                                                         | Older than 18 years old                     | -                                                                                                                                  | Yes                | Yes (1038/0/1038)                                                                                               | -                                                                                                     |
| Wilkins et al., 2020      | Illinois, USA                | May 2020                          | Cross-sectional study | Healthcare workers                                                                | 6714                                                                                         | 40.6±12.0 years old                         | -                                                                                                                                  | No                 | Yes (6510/0/6714)                                                                                               | Adequate PPE available for use by all staff at all times.                                             |
| Abo-Leyah et al., 2020    | Scotland, UK                 | May 2020                          | Cross-sectional study | Health and social care workers; Blood Samples taken at general practice surgeries | Health and social care workers: 2062; Blood Samples taken at general practice surgeries: 231 | Mean: 44.8 years old                        | -                                                                                                                                  | Yes                | Yes (Health and social care workers: 2062/0/2062; Blood Samples taken at general practice surgeries: 231/0/231) | -                                                                                                     |
| Vince et al., 2020        | Croatia                      | May 2020                          | Longitudinal study    | Football players and club staff                                                   | 350                                                                                          | 28.5 ±9.1 years old                         | -                                                                                                                                  | Yes                | Yes (0/305/350)                                                                                                 | -                                                                                                     |
| Alkurt et al., 2020       | Istanbul and Kocaeli, Turkey | May 2020                          | Cross-sectional study | Healthcare workers                                                                | 813                                                                                          | -                                           | -                                                                                                                                  | Yes                | Yes (813/0/813)                                                                                                 | -                                                                                                     |
| Vassallo et al., 2020     | USA                          | Jun 2020                          | Cross-sectional study | Blood Donors                                                                      | 189656                                                                                       | Older than 16 years old                     | -                                                                                                                                  | No                 | Yes (189656/0/189656)                                                                                           | -                                                                                                     |
| Melo et al., 2020         | Sergipe, Brazil              | Jun 2020                          | Cross-sectional study | Healthcare workers                                                                | 471                                                                                          | -                                           | -                                                                                                                                  | No                 | Yes (471/0/471)                                                                                                 | -                                                                                                     |
| Favara et al., 2020       | Eastern Region, UK           | Jun 2020                          | Longitudinal study    | Staff involved in treating cancer patients                                        | 434                                                                                          | 40 (19-66) years old                        | Working within the oncology department ward or out-patient setting and not primarily within a dedicated SARS-CoV-2 in-patient ward | Yes                | Yes (434/0/434)                                                                                                 | -                                                                                                     |
| Remes-Troche et al., 2020 | Veracruz, Mexico             | Jun 2020                          | Cross-sectional study | Adults outpatients                                                                | 2174                                                                                         | 41.8±15.17 years old                        | -                                                                                                                                  | Yes                | Yes (2174/0/2174)                                                                                               | -                                                                                                     |
| Ladage et al., 2020       | Austria                      | -                                 | Cross-sectional study | Inhabitants in a township                                                         | 835                                                                                          | -                                           | -                                                                                                                                  | Yes                | Yes (835/0/835)                                                                                                 | -                                                                                                     |
| Silva et al., 2020        | Buenos Aires, Argentina      | Jun 2020                          | Cross-sectional study | Healthcare workers from public facilities                                         | 738                                                                                          | Older than 18 years old                     | Close contact with a confirmed case of COVID- 19                                                                                   | Yes                | Yes (738/0/738)                                                                                                 | 75.86% of people claimed to always use Personal Protective Equipment, 16.4% use PPE most of the time. |

| Reference               | Location (country)                                      | Study period (starting timepoint) | Study type            | Study population                                                               | No. of participants                                                     | Age of participants (Median, range/mean±SD)                                                                                                                    | Exposures                                                    | Symptom assessment | Serology collected (No. of single serum/paired sera/participants)                            | Comment                                                                                                                                                                                                                |
|-------------------------|---------------------------------------------------------|-----------------------------------|-----------------------|--------------------------------------------------------------------------------|-------------------------------------------------------------------------|----------------------------------------------------------------------------------------------------------------------------------------------------------------|--------------------------------------------------------------|--------------------|----------------------------------------------------------------------------------------------|------------------------------------------------------------------------------------------------------------------------------------------------------------------------------------------------------------------------|
| Craigie et al., 2020    | Dunedin, New Zealand                                    | Jun 2020                          | Cross-sectional study | Probable cases and higher risk individuals                                     | 11279                                                                   | 49 (10-59) years old<br>46 (4-90) years old                                                                                                                    | -                                                            | -                  | Yes (1127/0/1127, 9/0/9)                                                                     | -                                                                                                                                                                                                                      |
| Silva et al., 2020      | São Paulo, Brazil                                       | Jun 2020                          | Cross-sectional study | Professionals in research institute                                            | 406                                                                     | Median (IQR): 50 (40-57) years old                                                                                                                             | -                                                            | Yes                | Yes (406/0/406)                                                                              | -                                                                                                                                                                                                                      |
| Strazzulla et al., 2020 | Ile de France region, France                            | Jun 2020                          | Cross-sectional study | Nursing home residents                                                         | 66                                                                      | 78.27±10.64 years old                                                                                                                                          | -                                                            | Yes                | Yes (61/0/66)                                                                                | -                                                                                                                                                                                                                      |
| Ray et al., 2020        | New Delhi, India                                        | Jun 2020                          | Cross-sectional study | Patients who were admitted to the medicine wards and intensive care unit (ICU) | 212                                                                     | 41.2±15.4 years old                                                                                                                                            | -                                                            | No                 | Yes (212/0/212)                                                                              | -                                                                                                                                                                                                                      |
| Bardai et al., 2020     | Montreal, Canada                                        | Jun 2020                          | Cross-sectional study | Children patients; accompanying persons; hospital employees                    | Children patients: 39; accompanying persons: 61; hospital employees: 99 | Median (IQR):<br>Children patients: 15.6 (13.4-16.8) years old;<br>accompanying persons: 47.1 (41.4; 50.8) years old;<br>hospital employees: 42.5 (32.5; 52.5) | -                                                            | Yes                | Yes (Children patients: 39/0/39, accompanying persons: 61/0/61, hospital employees: 99/0/99) | -                                                                                                                                                                                                                      |
| Cooper et al., 2020     | Cambridge University Hospitals NHS Foundation Trust, UK | Jun 2020                          | Cross-sectional study | Staff member                                                                   | 5698                                                                    | Median: 38 years old                                                                                                                                           | -                                                            | Yes                | Yes (5698/0/5698)                                                                            | -                                                                                                                                                                                                                      |
| Hommel et al., 2020     | Berlin, Germany                                         | Jun 2020                          | Cross-sectional study | Students and teachers                                                          | 535                                                                     | -                                                                                                                                                              | -                                                            | Yes                | Yes (527/0/535)                                                                              | -                                                                                                                                                                                                                      |
| Nishida et al., 2020    | Osaka Prefecture, Japan                                 | Jun 2020                          | Cross-sectional study | Hospital staff                                                                 | 926                                                                     | 40.0±11.8 years old                                                                                                                                            | Direct contact with confirmed or suspected COVID-19 patients | Yes                | Yes (925/0/926)                                                                              | Standard precautions for general patients and personal protective equipment, including N95 masks, face shields, caps, gowns and double gloves, were used, when treating patients with suspected or confirmed COVID-19. |
| Nawa et al., 2020       | Tochigi, Japan                                          | Jun 2020                          | Cross-sectional study | Households randomly selected from Utsunomiya City's basic resident registry    | 2290                                                                    | All ages                                                                                                                                                       | -                                                            | Yes                | Yes (742/0/2290)                                                                             | All cases were afebrile                                                                                                                                                                                                |

| Reference               | Location (country)                            | Study period (starting timepoint) | Study type            | Study population                                                                 | No. of participants                                                           | Age of participants (Median, range/mean±SD) | Exposures                          | Symptom assessment | Serology collected (No. of single serum/paired sera/participants)                                | Comment               |
|-------------------------|-----------------------------------------------|-----------------------------------|-----------------------|----------------------------------------------------------------------------------|-------------------------------------------------------------------------------|---------------------------------------------|------------------------------------|--------------------|--------------------------------------------------------------------------------------------------|-----------------------|
| Qutob et al., 2020      | West Bank, Palestine                          | May 2020                          | Cross-sectional study | West Bank's residents; Individuals visiting medical laboratories                 | West Bank's residents: 1355; Individuals visiting medical laboratories: 1136; | Older than 15 years old                     |                                    | No                 | Yes (Individuals visiting medical laboratories: 1136/0/1136; West Bank's residents: 1319/0/1355) | -                     |
| Khan et al., 2020       | District Srinagar, India                      | Jun 2020                          | Cross-sectional study | Healthcare workers                                                               | 2915                                                                          | 38.6 years old                              |                                    | Yes                | Yes (2905/0/2915)                                                                                | -                     |
| Haq et al., 2020        | Peshawar city, Pakistan                       | Jun 2020                          | Cross-sectional study | Healthcare workers                                                               | 1011                                                                          | 33.6 ±10.5 years old                        | Direct contact with COVID patient; | Yes                | Yes (1011/0/1011)                                                                                | Inadequate use of PPE |
| Jin et al., 2020        | New York City Metro, USA                      | Jun 2020                          | Cross-sectional study | Blood Donors                                                                     | 1000                                                                          | Range: 16-78 years old                      |                                    | No                 | Yes (1000/0/1000)                                                                                | -                     |
| Ulyte et al., 2020      | Zurich, Switzerland                           | Jun 2020; Oct 2020                | Longitudinal study    | School children                                                                  | 2603                                                                          | range: 6-16 years old                       |                                    | No                 | Yes (107/2496/2603)                                                                              | -                     |
| Asuquo et al., 2020     | Calabar, Nigeria                              | Jun 2020                          | Cross-sectional study | Clinic staff and patients                                                        | 66                                                                            | Older than 18 years old                     |                                    | No                 | Yes (66/0/66)                                                                                    | -                     |
| Ward et al., 2020       | England, UK                                   | Jun 2020                          | Cross-sectional study | Community adults                                                                 | 105651                                                                        | Older than 18 years old                     |                                    | Yes                | Yes (Round1: 99908/0/99908; Round2: 105829/0/105829; Round3: 159367/0/159367)                    | -                     |
| Menezes et al., 2020    | Brazil                                        | Jun 2020                          | Cross-sectional study | Community residents                                                              | 33205                                                                         | All ages                                    |                                    | Yes                | Yes (31869/0/33205)                                                                              | -                     |
| Laursen et al., 2020    | Sweden and Denmark                            | Jun 2020                          | Longitudinal study    | Employees in a rescue corps                                                      | 3272                                                                          | Majority: 40-60 years old                   |                                    | No                 | Yes (3243/0/3272)                                                                                | -                     |
| Kahlert et al., 2020    | Northern and Eastern Switzerland, Switzerland | Jun 2020                          | Cross-sectional study | Hospital Workers                                                                 | 4664                                                                          | Median (IQR): 38.3 (29.7-49.5) years old    |                                    | No                 | Yes (4664/0/4664)                                                                                | -                     |
| ROEDERER et al., 2020   | Paris and Seine-Saint-Denis, France           | Jun 2020                          | Cross-sectional study | Residents in food distribution sites, emergency shelters, and workers residences | 818                                                                           | Mean: 39 years old                          |                                    | Yes                | Yes (818/0/818)                                                                                  | -                     |
| Demonbreun et al., 2020 | Illinois, USA                                 | Jun 2020                          | Cross-sectional study | Community/university-based participants                                          | 1545                                                                          | Older than 18 years old                     |                                    | Yes                | Yes (1545/0/1545)                                                                                | -                     |
| Ariza et al., 2020      | Bogotá, Colombia                              | Jun 2020                          | Longitudinal study    | medical trainees or medical doctors                                              | 351                                                                           |                                             |                                    | Yes                | Yes (351/335/351)                                                                                | -                     |

| Reference                 | Location (country)             | Study period (starting timepoint) | Study type            | Study population                                                                                  | No. of participants                                                                                           | Age of participants (Median, range/mean±SD) | Exposures                                              | Symptom assessment | Serology collected (No. of single serum/paired sera/participants)                                                                       | Comment                                                            |
|---------------------------|--------------------------------|-----------------------------------|-----------------------|---------------------------------------------------------------------------------------------------|---------------------------------------------------------------------------------------------------------------|---------------------------------------------|--------------------------------------------------------|--------------------|-----------------------------------------------------------------------------------------------------------------------------------------|--------------------------------------------------------------------|
| Majiya et al., 2020       | Niger State, Nigeria           | Jun 2020                          | Cross-sectional study | Residents                                                                                         | 185                                                                                                           | All ages                                    | Travel overseas, contact with overseas returnee        | Yes                | Yes (185/0/185)                                                                                                                         | -                                                                  |
| Javed et al., 2020        | Peshawar and Quetta, Pakistan  | Jul 2020                          | Cross-sectional study | Working population                                                                                | 24210                                                                                                         | 18-65 years old                             | -                                                      | Yes                | Yes (24210/0/24210)                                                                                                                     | -                                                                  |
| Buonsenso et al., 2020    | Rome, Italy                    | -                                 | Cross-sectional study | Household contacts of index patients                                                              | 80                                                                                                            | 0-56 years old                              | Household contacts of index patients                   | No                 | Yes (80/0/80)                                                                                                                           | -                                                                  |
| Kasztelewicz et al., 2020 | Warsaw, Poland                 | Jul 2020                          | Longitudinal study    | Healthcare workers in a tertiary pediatric hospital                                               | 2282                                                                                                          | Mean (range): 48 (38-56) years old          | Contact with confirmed COVID-19 patient                | Yes                | Yes (1879/0/2282)                                                                                                                       | -                                                                  |
| Malecki et al., 2020      | Wisconsin, USA                 | Jul 2020                          | Longitudinal study    | Adults and children                                                                               | WAVE I: 1056<br>WAVE II: 1070                                                                                 | Older than 12 years old                     | -                                                      | No                 | Yes (WAVE I: 996/unk/1056; WAVE II: 994/unk/1070)                                                                                       | A total of 876 individuals participated in both WAVE I and WAVE II |
| FUKUDA et al., 2020       | Tokyo, Japan                   | Jul 2020                          | Cross-sectional study | Healthcare workers with low exposure risk at a frontline hospital                                 | 4147                                                                                                          | 36.8±12 years old                           | -                                                      | Yes                | Yes (4147/0/4147)                                                                                                                       | -                                                                  |
| Díaz-Salazar et al., 2020 | Nuevo Leon, Mexico             | Jul 2020                          | Cross-sectional study | Government employees                                                                              | 3268                                                                                                          | Mean (range): 40 (3-49) years old           | -                                                      | Yes                | Yes (3268/0/3268)                                                                                                                       | -                                                                  |
| Bruckner et al., 2020     | Orange County, California, USA | Jul 2020                          | Cross-sectional study | Adults residents                                                                                  | 2979                                                                                                          | Older than 18 years old                     | -                                                      | -                  | Yes (2979/0/2979)                                                                                                                       | -                                                                  |
| Goenka et al., 2020       | Kolkata, India                 | Jul 2020                          | Cross-sectional study | High-risk Healthcare workers;<br>Moderate-risk Healthcare workers;<br>Low-risk Healthcare workers | High-risk Healthcare workers: 136<br>Moderate-risk healthcare workers: 911<br>Low-risk healthcare workers: 75 | Majority: 30-50                             | Working/ have worked in COVID ward/Intensive Care Unit | Yes                | Yes (High risk health care workers: 136/0/136<br>Moderate risk health care workers: 911/0/911<br>Low risk health care workers: 75/0/75) | -                                                                  |
| Flemand et al., 2020      | France                         | Jul 2020                          | Cross-sectional study | Individuals visiting the recruitment centers                                                      | 480                                                                                                           | Mean (range): 38.3 (0.2-87) years old       | -                                                      | Yes                | Yes (480/0/480)                                                                                                                         | -                                                                  |
| Lopez et al., 2020        | Midwestern region, USA         | Jul 2020                          | Cross-sectional study | School employees                                                                                  | 753                                                                                                           | Older than 18 years old                     | -                                                      | Yes                | Yes (753/0/753)                                                                                                                         | -                                                                  |
| Ghose et al., 2020        | Maharashtra, India             | Jul 2020                          | Cross-sectional study | Community residents                                                                               | 2089                                                                                                          | -                                           | -                                                      | Yes                | Yes (1659/0/2089)                                                                                                                       | -                                                                  |



| Reference                | Location (country)                      | Study period (starting timepoint) | Study type            | Study population                                                                                | No. of participants                                                                                                  | Age of participants (Median, range/mean±SD) | Exposures | Symptom assessment | Serology collected (No. of single serum/paired sera/participants)                                                                             | Comment                                                                                                                          |
|--------------------------|-----------------------------------------|-----------------------------------|-----------------------|-------------------------------------------------------------------------------------------------|----------------------------------------------------------------------------------------------------------------------|---------------------------------------------|-----------|--------------------|-----------------------------------------------------------------------------------------------------------------------------------------------|----------------------------------------------------------------------------------------------------------------------------------|
| Pasqualotto et al., 2020 | Ten cities, Brazil                      | Jul 2020                          | Longitudinal study    | Military police forces                                                                          | 1592                                                                                                                 | 34±8 years old                              | -         | Yes                | Yes (1526/66/1592)                                                                                                                            | The vast majority reported use of personal protective equipment at work, such as masks (99.2%), gloves (23.2%), and face shields |
| Satpati et al., 2020     | West Bengal, India                      | Jul 2020                          | Cross-sectional study | Population of Paschim Medinipur District                                                        | 458                                                                                                                  | All ages                                    | -         | Yes                | Yes (458/0/458)                                                                                                                               | -                                                                                                                                |
| Al-Thani et al., 2020    | Qatar                                   | Jul 2020                          | Cross-sectional study | The craft and manual worker                                                                     | 2641                                                                                                                 | Mean (range): 35 (18-80) years old          | -         | Yes                | Yes (2641/0/2641)                                                                                                                             | -                                                                                                                                |
| Sharma et al., 2020      | Delhi, India                            | Jul 2020                          | Cross-sectional study | Residents of Delhi                                                                              | First round: 15046<br>Second round: 17409<br>Third round: 15015                                                      | Older than 5 year old                       | -         | Yes                | Yes (First round: 15046/0/15046; Second round: 17409/0/17409; Third round: 15015/0/15015)                                                     | -                                                                                                                                |
| Kshatri et al., 2020     | Bhubaneswar, Berhampur, Rourkela, India | Aug 2020                          | Cross-sectional study | Adult population                                                                                | 4146                                                                                                                 | 44.20±14.2 years old                        | -         | Yes                | Yes (4146/0/4146)                                                                                                                             | -                                                                                                                                |
| Cruz-Arenas et al., 2020 | Mexico City, Mexico                     | Aug 2020                          | Cross-sectional study | Health care workers in a non-COVID' hospital                                                    | 300                                                                                                                  | Older than 18 years old                     | -         | Yes                | Yes (300/0/300)                                                                                                                               | -                                                                                                                                |
| Murhekar et al., 2020    | India                                   | Aug 2020                          | Cross-sectional study | General population                                                                              | 29082                                                                                                                | Older than 10 years old                     | -         | Yes                | Yes (29082/0/29082)                                                                                                                           | -                                                                                                                                |
| Rezwani et al., 2020     | Karachi, Pakistan                       | Sep 2020                          | Cross-sectional study | Industrial workers<br>Healthcare workers<br>Healthy voluntary blood donors<br>Dialysis patients | Industrial workers: 1118<br>Healthcare workers: 478<br>Healthy voluntary blood donors: 505<br>Dialysis patients: 303 | 35.27±13.7 years old                        | -         | No                 | Yes (Industrial workers: 1118/0/1118; Healthcare workers: 478/0/478; Healthy voluntary blood donors: 505/0/505; Dialysis patients: 303/0/303) | -                                                                                                                                |
| Babu et al., 2020        | Karnataka, India                        | Sep 2020                          | Cross-sectional study | General population                                                                              | 16585                                                                                                                | Older than 18 years old                     | -         | Yes                | Yes (15939/0/16585)                                                                                                                           | -                                                                                                                                |
| Thielecke et al., 2020   | Berlin, Germany                         | Sep 2020                          | Cross-sectional study | Kindergarten children, staff and connected household members                                    | 720                                                                                                                  | All ages                                    | -         | Yes                | Yes (672/0/720)                                                                                                                               | -                                                                                                                                |
| Ladage et al., 2020      | Wachau, Austria                         | Oct 2020                          | Longitudinal study    | Inhabitants                                                                                     | 242                                                                                                                  | -                                           | -         | Yes                | Yes (242/0/242)                                                                                                                               | -                                                                                                                                |

| Reference                                           | Location (country)                        | Study period (starting timepoint) | Study type            | Study population                                                            | No. of participants                           | Age of participants (Median, range/mean±SD) | Exposures                                                                       | Symptom assessment | Serology collected (No. of single serum/paired sera/participants)       | Comment                                                                                                                                                                             |
|-----------------------------------------------------|-------------------------------------------|-----------------------------------|-----------------------|-----------------------------------------------------------------------------|-----------------------------------------------|---------------------------------------------|---------------------------------------------------------------------------------|--------------------|-------------------------------------------------------------------------|-------------------------------------------------------------------------------------------------------------------------------------------------------------------------------------|
| Kumar et al., 2020                                  | Ontario, Canada                           | -                                 | Cross-sectional study | Health care workers                                                         | 996                                           | 40.8±11.1 years old                         | Directly looked after COVID patient in the last 2 weeks                         | Yes                | Yes (996/0/996)                                                         | Universal masking was in effect in the hospital and HCW with direct patient contact were required to wear a face shield. N95 masks were reserved for aerosol generating procedures. |
| Official reports                                    |                                           |                                   |                       |                                                                             |                                               |                                             |                                                                                 |                    |                                                                         |                                                                                                                                                                                     |
| MedLife, Romania, 2020                              | Romania                                   | -                                 | Cross-sectional study | Healthcare workers                                                          | 371                                           | -                                           | Contact with patients: average 25 people per day (two thirds were patients)2020 | -                  | Yes (371/0/371)                                                         | -                                                                                                                                                                                   |
| Public Health Ontario, Canada, 2020                 | Ontario, Canada                           | Mar 2020                          | Cross-sectional study | Serum or plasma left over after diagnostic testing                          | Mar 2020: 827; May 2020: 1061; Jun 2020: 7014 | All ages                                    | -                                                                               | No                 | Yes (Mar 2020: 827/0/827, May 2020: 1061/0/1061, Jun 2020: 7014/0/7014) | -                                                                                                                                                                                   |
| Norwegian Institute of Public Health, 2020          | Norway                                    | Apr 2020                          | Cross-sectional study | Residual serum samples                                                      | 900                                           | All ages                                    | -                                                                               | No                 | Yes (900/0/900)                                                         | -                                                                                                                                                                                   |
| Office of National Statistics, UK, 2020             | UK                                        | Apr 2020                          | Cohort study          | General population                                                          | 5248                                          | Older than 2 years old                      | -                                                                               | Yes                | Yes (5248/0/5248)                                                       | -                                                                                                                                                                                   |
| The Government of Jersey, UK, 2020                  | UK                                        | Apr 2020                          | Longitudinal study    | Adult resident population living in private households in Jersey            | Round 1: 855;                                 | Older than 16 years old                     | -                                                                               | Yes                | Yes (Round 1: 855/0/855)                                                | -                                                                                                                                                                                   |
| Canadian Blood Services, 2020                       | Canada                                    | May 2020                          | Cross-sectional study | Blood donor                                                                 | 37737                                         | Older than 17 years old                     | -                                                                               | No                 | Yes (37737/0/37737)                                                     | -                                                                                                                                                                                   |
| Ministry of Health, Labour and Welfare, Japan, 2020 | Tokyo, Japan; Osaka, Japan; Miyagi, Japan | Jun 2020                          | Cross-sectional study | Residents                                                                   | Tokyo: 1971; Osaka: 2970; Miyagi: 3009        | -                                           | -                                                                               | No                 | Yes (Tokyo: 1971/0/1971, Osaka: 2970/0/2970, Miyagi: 3009/0/3009)       | -                                                                                                                                                                                   |
| NHS BT collection, 2020                             | England, UK                               | Jun 2020                          | Cross-sectional study | Blood donor                                                                 | 16670                                         | Older than 17 years old                     | -                                                                               | No                 | Yes (16670/0/16670)                                                     | -                                                                                                                                                                                   |
| RCGP collection, 2020                               | England, UK                               | Jun 2020                          | Cross-sectional study | Sera collected via general practitioners at the time of routine blood tests | 4315                                          | Range: 18-64 years old                      | -                                                                               | No                 | Yes (4315/0/4315)                                                       | -                                                                                                                                                                                   |
| SEU and Paediatric collections, 2020                | England, UK                               | Jun 2020                          | Cross-sectional study | Residual sera from participating hospital laboratories                      | 1212                                          | Range: 18-64 years old                      | -                                                                               | No                 | Yes (1212/0/1212)                                                       | -                                                                                                                                                                                   |

| Reference                                                                    | Location (country) | Study period (starting timepoint) | Study type            | Study population                                   | No. of participants | Age of participants (Median, range/mean±SD) | Exposures | Symptom assessment | Serology collected (No. of single serum/paired sera/participants) | Comment |
|------------------------------------------------------------------------------|--------------------|-----------------------------------|-----------------------|----------------------------------------------------|---------------------|---------------------------------------------|-----------|--------------------|-------------------------------------------------------------------|---------|
| Health Protection Surveillance Centre, 2020                                  | Ireland            | Jun 2020                          | Cross-sectional study | People living in two geographical areas in Ireland | 1733                | Range: 12-69 years old                      | -         | Yes                | Yes (1733/0/1733)                                                 | -       |
| Islamic Republic of Afghanistan Ministry of Public Health, Afghanistan, 2020 | Afghanistan        | Jul 2020                          | Cross-sectional study | General population                                 | 9514                | Mean: 27 years old                          | -         | No                 | Yes (9514/0/9514)                                                 | -       |

Abbreviations: IQR: interquartile range; PPE: personal protective equipment; unk: unknown; CLIA: Chemiluminescent immunoassay

**Table S3. Summary of antibody detection assays to identify human infection with SARS-CoV-2 included in systematic review**

| Reference               | Paired serums | Days from last possible exposure to sampling (median/range) | Assay methods (screening methods/confirmatory methods) | Antibodies measured     | Targeted antigen | Test performance (sensitivity, specificity)*                   | Reported positive cut-off value                                                                                           | Comments                                                                                                                           |
|-------------------------|---------------|-------------------------------------------------------------|--------------------------------------------------------|-------------------------|------------------|----------------------------------------------------------------|---------------------------------------------------------------------------------------------------------------------------|------------------------------------------------------------------------------------------------------------------------------------|
| Peer-reviewed databases |               |                                                             |                                                        |                         |                  |                                                                |                                                                                                                           |                                                                                                                                    |
| Victoria et al., 2020   | Yes           | First: 14 days<br>Second: 6 weeks                           | ELISA                                                  | Total antibodies        | SP               | Sensitivity: 96.0%<br>Specificity: >99.0%                      | The cut-off OD value is 0.4;<br>Total anti-SARS-CoV-2 antibody titers >400 was considered to be seropositive.             | RT-PCR were also performed for participants; the ELISA were well-validated                                                         |
| To et al., 2020         | Yes           | 1-13 days for Hongkong residents evacuated from Hubei       | ELISA                                                  | IgG,                    | NP, SP           | Sensitivity: 57.8%-73.3%;<br>Specificity: 100.0%               | The cut-off OD values were 0.610 for anti-nucleoprotein IgG and 0.573 for anti-RBD IgG                                    | RT-PCR were also performed for participants                                                                                        |
|                         |               |                                                             | MN                                                     | Neutralizing antibodies | -                | Sensitivity: 91.1% (95%CI 78.8%-97.5%);<br>Specificity: 100.0% | Titer > 1:20 were considered to be seropositive.                                                                          |                                                                                                                                    |
| Hippich et al., 2020.   | Yes           | -                                                           | Luciferase immunoprecipitation                         | IgG                     | NP, SP           | Sensitivity: 97.3%;<br>Specificity: 100.0%                     | We defined anti- SARS-CoV-2 positivity as an RBD antibody titer of >0.9 AU and positive for anti-nucleocapsid antibodies- |                                                                                                                                    |
| Liang et al., 2020      | No            | -                                                           | CLIA                                                   | IgG, IgM                | NP, SP           | -                                                              | -                                                                                                                         | This antibody assay was approved by the Chinese Food and Drug Administration and pended approval by US FDA.                        |
|                         |               |                                                             | LFIA                                                   | IgG, IgM                | -                | -                                                              |                                                                                                                           |                                                                                                                                    |
| Ng et al., 2020         | No            | -                                                           | NT                                                     | Neutralizing antibodies | -                | -                                                              | Sample resulted in inhibition of 30% or greater                                                                           |                                                                                                                                    |
| Hallowell et al., 2020  | No            | Within 14 days                                              | ELISA                                                  | IgG, IgM, IgA           | SP               | -                                                              | Any specimens with titers ≥400 were considered positive by ELISA                                                          | RT-PCR were also performed for participants; Serum samples that were positive by ELISA were confirmed by microneutralization test. |
|                         |               |                                                             | MN                                                     | Neutralizing antibodies | -                | -                                                              |                                                                                                                           |                                                                                                                                    |
| Sam et al., 2020        | No            | -                                                           | ELISA                                                  | IgG                     | SP               | Sensitivity: 97.1%<br>Specificity: 88.6 %                      | -                                                                                                                         |                                                                                                                                    |
|                         |               |                                                             | MN                                                     | Neutralizing antibodies | -                | Sensitivity: 100%<br>Specificity: 100 %                        |                                                                                                                           |                                                                                                                                    |
| Jeong et al., 2020      | No            | -                                                           | CLIA                                                   | IgG                     | NP               | -                                                              | -                                                                                                                         |                                                                                                                                    |
| Buss et al., 2020       | -             | -                                                           | CLIA                                                   | IgG                     | NP               | Sensitivity: 84.0%<br>Specificity: 99.9%                       | 1.4 S/C threshold to define positive result                                                                               |                                                                                                                                    |
| Stadlbauer et al., 2020 | Yes           | -                                                           | ELISA                                                  | IgG                     | -                | Sensitivity: 95.0%<br>Specificity: 100.0 %                     | -                                                                                                                         |                                                                                                                                    |

| Reference                  | Paired serums | Days from last possible exposure to sampling (median/range) | Assay methods (screening methods/confirmatory methods) | Antibodies measured     | Targeted antigen | Test performance (sensitivity, specificity)* | Reported positive cut-off value                                                                                                                                      | Comments                                                                                        |
|----------------------------|---------------|-------------------------------------------------------------|--------------------------------------------------------|-------------------------|------------------|----------------------------------------------|----------------------------------------------------------------------------------------------------------------------------------------------------------------------|-------------------------------------------------------------------------------------------------|
| Chen et al., 2020          | No            | Within 14 days                                              | ELISA                                                  | IgG, IgM                | NP, SP           | Sensitivity: 93.3%<br>Specificity: 100.0 %   | The cut off was determined if OD of 1:20 diluted serum was above the cut-off values for either IgM or IgG against both RBD and NP protein                            | RT-PCR were also performed for participants                                                     |
|                            |               |                                                             | MN                                                     | Neutralizing antibodies | -                | -                                            |                                                                                                                                                                      |                                                                                                 |
| Liu et al., 2020           | No            | -                                                           | ELISA                                                  | IgG                     | SP               | Specificity: 100.0 %                         | -                                                                                                                                                                    | -                                                                                               |
| Cavicchiolo et al., 2020   | No            | -                                                           | CLIA                                                   | IgG, IgM                | -                | -                                            | -                                                                                                                                                                    | RT-PCR were also performed for participants                                                     |
| Plebani et al., 2020       | No            | -                                                           | CLIA                                                   | IgG                     | NP, SP           | Sensitivity: 73.0%<br>Specificity: 98.0 %    | -                                                                                                                                                                    | -                                                                                               |
| Cox et al., 2020           | No            | -                                                           | ELISA                                                  | IgG                     | SP               | -                                            | -                                                                                                                                                                    | The laboratory method was described before <sup>8</sup> .                                       |
| Villalain et al., 2020     | No            | -                                                           | ELISA                                                  | IgG                     | SP               | -                                            | Titer >1:100 was defined as SARS-CoV-2 seropositivity                                                                                                                | -                                                                                               |
| Brandstetter et al., 2020  | No            | 15-28 days                                                  | ELISA                                                  | IgG, IgA                | SP               | -                                            | The OD ratio >1 was considered positive (The OD was detected at 450 nm and the OD-ratio of the measurement of each sample to the supplied calibrator was calculated) | RT-PCR were also performed for participants                                                     |
| Solodky et al., 2020       | No            | 15 days or more                                             | LFIA                                                   | IgG                     | -                | -                                            | -                                                                                                                                                                    | RT-PCR were also performed for participants                                                     |
| Zhang et al., 2020         | No            | -                                                           | ELISA                                                  | IgG, IgA, IgM           | -                | -                                            | The cutoff value of this test was defined by receiver operating characteristic curves                                                                                | -                                                                                               |
| Suda et al., 2020          | No            | -                                                           | LFIA                                                   | IgG                     | -                | Specificity: 98.0%                           | cutoff index $\geq$ 1.0 indicates a positive diagnosis                                                                                                               | -                                                                                               |
|                            |               |                                                             | CLIA                                                   | IgG                     | NP               | Specificity: 100.0%                          |                                                                                                                                                                      |                                                                                                 |
| Bogogiannidou et al., 2020 | No            | -                                                           | CLIA                                                   | IgG                     | NP               | Sensitivity: 84.0%<br>Specificity: 99.7%     | -                                                                                                                                                                    | All positive samples, as well as 100 randomly chosen negative samples were confirmed with ELISA |
| Xu et al., 2020            | No            | -                                                           | CLIA                                                   | IgG                     | NP, SP           | Sensitivity: 83.0%<br>Specificity: 100.0%    | An S/CO value of >1.0 for either IgG or IgM was regarded as positive.                                                                                                | -                                                                                               |
| Vena et al., 2020          | No            | -                                                           | CLIA, LFIA                                             | IgG, IgM                | NP, SP           | -                                            | -                                                                                                                                                                    | -                                                                                               |
| Ng et al., 2020            | No            | -                                                           | CLIA                                                   | IgG                     | NP               | -                                            | -                                                                                                                                                                    | Seropositive samples were confirmed by MN and chemiluminescent immunoassay.                     |

| Reference                 | Paired serums | Days from last possible exposure to sampling (median/range) | Assay methods (screening methods/confirmatory methods) | Antibodies measured     | Targeted antigen | Test performance (sensitivity, specificity)*                                          | Reported positive cut-off value                                  | Comments                                                                                                                                                                                   |
|---------------------------|---------------|-------------------------------------------------------------|--------------------------------------------------------|-------------------------|------------------|---------------------------------------------------------------------------------------|------------------------------------------------------------------|--------------------------------------------------------------------------------------------------------------------------------------------------------------------------------------------|
| Venugopal et al., 2020    | No            | -                                                           | CLIA                                                   | IgG                     | NP               | -                                                                                     | An index value of $\geq 1.4$                                     | -                                                                                                                                                                                          |
| Dingens et al., 2020      | No            | -                                                           | ELISA                                                  | IgG                     | SP               | -                                                                                     | -                                                                | Seropositive samples were validated by Abbott CLIA and MN.                                                                                                                                 |
| Barzin et al., 2020       | No            | -                                                           | CLIA                                                   | IgG                     | NP               | Sensitivity: 100.0%<br>Specificity: 98.9%                                             | An index value of $\geq 1.4$                                     | -                                                                                                                                                                                          |
| Pérez-García et al., 2020 | No            | -                                                           | LFIA                                                   | IgG, IgM                | -                | Sensitivity: 88.0%<br>Specificity: 100.0%                                             | -                                                                | -                                                                                                                                                                                          |
| Trieu et al., 2020        | Yes           | -                                                           | ELISA                                                  | IgG, IgM, IgA           | SP               | -                                                                                     | The OD ratio $\geq 0.708$ were considered to be seropositive.    | -                                                                                                                                                                                          |
| Fischer et al., 2020      | No            | -                                                           | ELISA                                                  | IgG                     | SP               | -                                                                                     | The OD ratio $\geq 1.1$ were considered to be seropositive.      | Seropositive results were confirmed using the Architect SARS-CoV-2 IgG targeting the viral nucleocapsid and the LIAISON SARS-CoV-2 S1/S2 IgG assay targeting the SARS-CoV-2 spike protein. |
| McCafferty et al., 2020   | No            | -                                                           | CLIA                                                   | IgG, IgM                | NP               | -                                                                                     | -                                                                | -                                                                                                                                                                                          |
| Brown et al., 2020        | No            | 14 days                                                     | ELISA                                                  | IgG, IgM, IgA           | SP               | -                                                                                     | Antibody titers of $>400$ was considered to be seropositive      | -                                                                                                                                                                                          |
| Han et al., 2020          | No            | -                                                           | LFIA                                                   | IgG, IgM                | -                | -                                                                                     | -                                                                | RT-PCR were also performed for participants                                                                                                                                                |
| Zhou et al., 2020         | No            | -                                                           | CLIA                                                   | IgG, IgM                | NP, SP           | -                                                                                     | IgM or IgG level $\geq 10.0$ AU/ml was designated as positive.   | -                                                                                                                                                                                          |
| Thompson et al., 2020     | No            | -                                                           | MN                                                     | Neutralizing antibodies | -                | Sensitivity: 94.11% (95%CI 79.2-100.0%);<br>Specificity: 100.0%<br>(95%CI 98.10-100%) | -                                                                | -                                                                                                                                                                                          |
|                           |               |                                                             | ELISA                                                  | IgG                     | SP               | -                                                                                     | -                                                                | A second ELISA based assay was used to confirm the analysis                                                                                                                                |
| Carlo et al., 2020        | Yes           | -                                                           | CLIA                                                   | IgG, IgM                | NP, SP           | Specificity: 100.0%                                                                   | -                                                                | -                                                                                                                                                                                          |
| Tu et al., 2020           | No            | -                                                           | ELISA                                                  | IgG, IgM                | NP, SP           | -                                                                                     | Adding the average absorbance of the negative control plus 0.042 | -                                                                                                                                                                                          |
|                           | No            | -                                                           | Dual-target immunofluorescence assay                   | IgG                     | NP, SP           | -                                                                                     | RBD/N fluorescence value was $> 2000$                            | -                                                                                                                                                                                          |

| Reference              | Paired serums | Days from last possible exposure to sampling (median/range) | Assay methods (screening methods/confirmatory methods) | Antibodies measured     | Targeted antigen | Test performance (sensitivity, specificity)*                                          | Reported positive cut-off value                                                                                                                                                                   | Comments                                                                                                                                       |
|------------------------|---------------|-------------------------------------------------------------|--------------------------------------------------------|-------------------------|------------------|---------------------------------------------------------------------------------------|---------------------------------------------------------------------------------------------------------------------------------------------------------------------------------------------------|------------------------------------------------------------------------------------------------------------------------------------------------|
| Kohler et al., 2020    | No            | -                                                           | LFIA                                                   | IgG                     | -                | -                                                                                     | -                                                                                                                                                                                                 | -                                                                                                                                              |
| Fuereder et al., 2020  | No            | -                                                           | CLIA                                                   | Total antibodies        | NP               | -                                                                                     | A cut-off index >1 is regarded as positive                                                                                                                                                        | Seropositive samples were validated by Abbott CLIA (An index (S/C) >1.4 is regarded as positive); RT-PCR were also performed for participants. |
| Fusco et al., 2020     | Yes           | -                                                           | CLIA                                                   | IgG, IgM                | NP, SP           | -                                                                                     | -                                                                                                                                                                                                 | -                                                                                                                                              |
| Havers et al., 2020    | No            | -                                                           | ELISA                                                  | IgG, IgM, IgA           | SP               | Sensitivity: 96.0% (95%CI 89.98 - 98.89%); Specificity: 99.3% (95%CI 98.32 - 99.88%). | A specimen was considered reactive if, on confirmatory testing, at a background corrected optical density (OD) of 0.4 and at a serum dilution of 1:100, it had a signal to threshold ratio of >1. | -                                                                                                                                              |
| Xu et al., 2020        | No            | -                                                           | ELISA                                                  | IgG, IgA                | NP, SP           | -                                                                                     | -                                                                                                                                                                                                 | -                                                                                                                                              |
| Behrens et al., 2020   | No            | Mean: 30.4 days                                             | ELISA                                                  | IgG, IgA                | NP, SP           | IgG:<br>Specificity: 99.3%<br>IgA:<br>Specificity: 97.5%                              | IgG ratio >1.1 were seropositive                                                                                                                                                                  | -                                                                                                                                              |
|                        |               |                                                             | NT                                                     | Neutralizing antibodies | -                | -                                                                                     | -                                                                                                                                                                                                 | -                                                                                                                                              |
| Loconsole et al., 2020 | No            | -                                                           | LFIA                                                   | IgG, IgM                | -                | -                                                                                     | -                                                                                                                                                                                                 | -                                                                                                                                              |
| Mansour et al., 2020   | No            | 2 weeks                                                     | ELISA                                                  | IgG                     | SP               | -                                                                                     | Antibody titers of $\geq 320$ was considered to be seropositive                                                                                                                                   | -                                                                                                                                              |
| Gallian et al., 2020   | No            | -                                                           | NT                                                     | Neutralizing antibodies | -                | Specificity: 100.0%                                                                   | -                                                                                                                                                                                                 | -                                                                                                                                              |
| Korth et al., 2020     | No            | -                                                           | ELISA                                                  | IgG                     | SP               | -                                                                                     | -                                                                                                                                                                                                 | RT-PCR were also performed for participants                                                                                                    |
| Bielecki et al., 2020  | No            | -                                                           | ELISA                                                  | IgG, IgM, IgA           | -                | Sensitivity: 83.0% Specificity: 100.0%                                                | The OD ratio >1.1 was considered positive                                                                                                                                                         | RT-PCR were also performed for participants                                                                                                    |
| Tsaneva et al., 2020   | Yes           | $\geq 7$ days                                               | LFIA                                                   | IgG, IgM                | -                | -                                                                                     | -                                                                                                                                                                                                 | Two of the COVID-19 positive women were tested with a pair of serum samples                                                                    |
|                        | Yes           | -                                                           | ELISA                                                  | -                       | SP               | -                                                                                     | The cut-off OD values of 0.9 were considered positive                                                                                                                                             | RT-PCR were also performed for participants                                                                                                    |

| Reference                       | Paired serums | Days from last possible exposure to sampling (median/range) | Assay methods (screening methods/confirmatory methods) | Antibodies measured            | Targeted antigen | Test performance (sensitivity, specificity)*                                                                                                    | Reported positive cut-off value                                                                                                                                                         | Comments                                    |
|---------------------------------|---------------|-------------------------------------------------------------|--------------------------------------------------------|--------------------------------|------------------|-------------------------------------------------------------------------------------------------------------------------------------------------|-----------------------------------------------------------------------------------------------------------------------------------------------------------------------------------------|---------------------------------------------|
| Houlihan et al., 2020           |               |                                                             | Flow cytometry                                         | -                              | SP               | -                                                                                                                                               | -                                                                                                                                                                                       |                                             |
| Liu et al., 2020                | -             | -                                                           | CLIA                                                   | IgG                            | NP, SP           | -                                                                                                                                               | -                                                                                                                                                                                       | -                                           |
| Basteiro et al., 2020           | Yes           | ≥ 10 days                                                   | Microsphere-based assay                                | IgG, IgA, IgM                  | SP               | IgG:<br>Sensitivity: 97.0% Specificity: 98.0%<br>IgA:<br>Sensitivity: 97.0% Specificity: 98.0%<br>IgM:<br>Sensitivity: 75.0% Specificity: 98.0% | Assay cutoff was calculated as 10 to the mean plus 3 standard deviations of log10-transformed median fluorescent intensities (MFIs) of 47 negative controls.                            | RT-PCR were also performed for participants |
| Isherwood et al., 2020          | -             | -                                                           | CLIA                                                   | IgG                            | NP               | -                                                                                                                                               | -                                                                                                                                                                                       | -                                           |
| Xu et al., 2020                 | No            | -                                                           | CLIA                                                   | IgG, IgM                       | NP, SP           | IgG:<br>Sensitivity: 95.0% Specificity: 93.3%<br>IgM:<br>Sensitivity: 95% Specificity: 100.0%                                                   | Antibody levels were expressed as the ratio of the chemiluminescence signal over the cutoff (S/CO) value. An S/CO value higher than 1.0 for either IgG or IgM was regarded as positive. | RT-PCR were also performed for participants |
| Milani et al., 2020             | No            | -                                                           | ELISA                                                  | IgG, IgM, and total antibodies | SP               | -                                                                                                                                               | -                                                                                                                                                                                       | RT-PCR were also performed for participants |
| Medas et al., 2020              | No            | -                                                           | CLIA                                                   | IgG, IgM                       | NP, SP           | -                                                                                                                                               | IgM cut-off is 1.0 AU/mL, IgG cut-off is 1.1 AU/mL.                                                                                                                                     | -                                           |
| Vos et al., 2020                | No            | -                                                           | multiplex-immunoassay                                  | IgG                            | SP               | -                                                                                                                                               | the cut off for seropositivity: 2.37AU/mL                                                                                                                                               |                                             |
| Savirón-Cornudella et al., 2020 | Yes           | -                                                           | LFIA                                                   | IgG                            | -                | -                                                                                                                                               | -                                                                                                                                                                                       |                                             |
| Bryan et al., 2020              | No            | -                                                           | CLIA                                                   | IgG                            | NP               | Sensitivity: 96.9% (89.5-99.5%) at 14 days, and 100% (95.1%-100%) at day 17;<br>Specificity: 99.9%                                              | The index value cutoff of 1.40 was considered positive (according to manufacturer's recommended)                                                                                        | -                                           |



| Reference                    | Paired serums | Days from last possible exposure to sampling (median/range) | Assay methods (screening methods/confirmatory methods) | Antibodies measured | Targeted antigen | Test performance (sensitivity, specificity)*                                                   | Reported positive cut-off value                                                                                                                 | Comments                                    |
|------------------------------|---------------|-------------------------------------------------------------|--------------------------------------------------------|---------------------|------------------|------------------------------------------------------------------------------------------------|-------------------------------------------------------------------------------------------------------------------------------------------------|---------------------------------------------|
| Hains et al., 2020           | Yes           | Within 21 days                                              | ELISA                                                  | IgG, IgM            | SP               | -                                                                                              | A positive ELISA result at 0.14 were considered seropositive.<br>Participants were considered to have seroconverted if positive for IgM or IgG. | RT-PCR were also performed for participants |
| Liu et al., 2020             | No            | 2 weeks or more                                             | CLIA                                                   | IgG, IgM            | NP, SP           | IgG:<br>Sensitivity: 97.8% Specificity: 97.9%<br>IgM:<br>Sensitivity: 88.2% Specificity: 99.0% | -                                                                                                                                               | RT-PCR were also performed for participants |
| Malickova et al., 2020       | No            | -                                                           | ELISA                                                  | IgG                 | SP               | -                                                                                              | An OD ratio >1.1 was considered positive.                                                                                                       | RT-PCR were also performed for participants |
| Paulino-Ramirez et al., 2020 | No            | -                                                           | LFIA                                                   | IgG, IgM            | SP               | -                                                                                              | -                                                                                                                                               | -                                           |
| Chirathaworn et al., 2020    | No            | -                                                           | ELISA                                                  | IgG                 | SP               | -                                                                                              | -                                                                                                                                               | -                                           |
| Posfay-Barbe et al., 2020    | No            | -                                                           | ELISA                                                  | IgG                 | SP               | -                                                                                              | ELISA ≥1.5 as positive;                                                                                                                         | -                                           |
| Slot et al., 2020            | No            | -                                                           | ELISA                                                  | Total antibodies    | SP               | -                                                                                              | OD/CO ratio ≥1                                                                                                                                  | -                                           |
| Olayanju et al., 2020        | No            | -                                                           | ELISA                                                  | IgG                 | SP               | -                                                                                              | -                                                                                                                                               | -                                           |
| Berte et al., 2020           | No            | -                                                           | ELISA                                                  | IgG                 | SP               | Sensitivity: 97.64%; Specificity: 95.2%                                                        | -                                                                                                                                               | -                                           |
|                              |               |                                                             | ELISA                                                  | IgA                 | SP               | Sensitivity: 71.4%; Specificity: 99.8%                                                         | -                                                                                                                                               | -                                           |
| Ciechanowicz et al., 2020    | No            | -                                                           | ELISA                                                  | IgG, IgM, IgA       | NP, SP           | -                                                                                              | -                                                                                                                                               | -                                           |
| Ko et al., 2020              |               |                                                             | Fluorescence immunoassay (FIA)                         | IgG                 | -                | Sensitivity: 99.1%; Specificity: 94.1%                                                         | -                                                                                                                                               | -                                           |
| Lackermair et al., 2020      | No            | -                                                           | ELISA                                                  | IgG                 | SP               | -                                                                                              | -                                                                                                                                               | RT-PCR were also performed for participants |
| Sotgiu et al., 2020          | No            | -                                                           | LFIA                                                   | IgG, IgM            | -                | -                                                                                              | -                                                                                                                                               | -                                           |
| Mohanty et al., 2020;        | No            | -                                                           | LFIA                                                   | IgG, IgM            | -                | Sensitivity: 100.0%;<br>Specificity: 100.0%                                                    | -                                                                                                                                               | -                                           |

| Reference                 | Paired serums | Days from last possible exposure to sampling (median/range) | Assay methods (screening methods/confirmatory methods) | Antibodies measured                | Targeted antigen | Test performance (sensitivity, specificity)*                                   | Reported positive cut-off value                                                                                                        | Comments                                                                       |
|---------------------------|---------------|-------------------------------------------------------------|--------------------------------------------------------|------------------------------------|------------------|--------------------------------------------------------------------------------|----------------------------------------------------------------------------------------------------------------------------------------|--------------------------------------------------------------------------------|
| Wu et al., 2020           | No            | -                                                           | LFIA                                                   | IgG, IgM                           | -                | -                                                                              | -                                                                                                                                      | RT-PCR were also performed for participants                                    |
| Stubblefield et al., 2020 | No            | -                                                           | ELISA                                                  | IgG, IgM, IgA (pan immunoglobulin) | -                | -                                                                              | -                                                                                                                                      | -                                                                              |
| Self et al., 2020         | No            | -                                                           | ELISA                                                  | IgG, IgM, IgA                      | SP               | Sensitivity: 96.0% Specificity: 99.0%                                          | A specimen was considered reactive if it had a signal to threshold ratio >1.0 at a serum dilution of 1:100, correcting for background. | -                                                                              |
| Stellato et al., 2020     | No            | -                                                           | LFIA                                                   | IgG, IgM                           | -                | -                                                                              | -                                                                                                                                      | -                                                                              |
| Flannery et al., 2020     | No            | -                                                           | ELISA                                                  | IgG, IgM                           | SP               | Sensitivity: 100.0% Specificity: 98.9%                                         | Either IgG or IgM level >0.48 arbitrary units                                                                                          | RT-PCR were also performed for participants                                    |
| Stock et al., 2020        | No            | -                                                           | ELISA                                                  | IgG                                | NP               | -                                                                              | The cutoff OD value was 1.1                                                                                                            | -                                                                              |
| Goldberg et al., 2020     | No            | -                                                           | LFIA                                                   | IgG, IgM                           | -                | Sensitivity: 90.0% Specificity: 99.47% (IgM); 99.74% (IgG);                    | -                                                                                                                                      | RT-PCR were also performed for participants;<br>The assay had validated by EUA |
| Stringhini et al., 2020   | No            | -                                                           | ELISA                                                  | IgG                                | SP               | Sensitivity: 93.0% Specificity: 100.0%                                         | The index value cutoff of 1.10 was considered positive (according to manufacturer's recommended)                                       | -                                                                              |
| Erikstrup et al., 2020    | No            | -                                                           | LFIA                                                   | IgG, IgM                           | -                | Sensitivity: 82.6% (95%CI 75.7%-88.2%); Specificity: 99.5% (95%CI 98.7%-99.9%) | Samples were concluded as reactive if the IgM, the IgG, or both bands were visible.                                                    | -                                                                              |
| Lahner et al., 2020       | No            | -                                                           | CLIA                                                   | IgG, IgM                           | -                | 14days:<br>Sensitivity: 80.0%<br>20days:<br>Sensitivity:100.0%                 | -                                                                                                                                      | RT-PCR were also performed for participants                                    |
| Labriola et al., 2020     | Yes           | -                                                           | CLIA                                                   | IgG, IgM, IgA                      | NP               | -                                                                              | -                                                                                                                                      | -                                                                              |
| Pallett et al., 2020      | No            | More than 14days                                            | LFIA                                                   | IgG, IgM                           | -                | IgG:<br>Sensitivity:<br>(95%CI 88.2%-93.4%);<br>Specificity:                   | -                                                                                                                                      | -                                                                              |

| Reference                    | Paired serums | Days from last possible exposure to sampling (median/range) | Assay methods (screening methods/confirmatory methods) | Antibodies measured | Targeted antigen | Test performance (sensitivity, specificity)*                                              | Reported positive cut-off value | Comments                                                                                                              |
|------------------------------|---------------|-------------------------------------------------------------|--------------------------------------------------------|---------------------|------------------|-------------------------------------------------------------------------------------------|---------------------------------|-----------------------------------------------------------------------------------------------------------------------|
|                              |               |                                                             |                                                        |                     |                  | (95%CI 94.0%-99.0%)<br>IgM:<br>Sensitivity:<br>(95%CI 88.2%-93.4%);                       |                                 |                                                                                                                       |
| Sood et al., 2020            | No            | -                                                           | LFIA                                                   | IgG, IgM            | -                | Sensitivity: 82.7% (95%CI 76.0%-88.4%);<br>Specificity: 99.5%<br>(95%CI 99.2%-99.7%)      |                                 | The unweighted and weighted proportions of positive tests (either IgM or IgG) in the analysis sample were calculated. |
| Shakiba et al., 2020         |               |                                                             | LFIA                                                   | IgG, IgM            | -                | Sensitivity: 83.3%<br>Specificity: 99.0%                                                  |                                 |                                                                                                                       |
| Madsen et al., 2020          | No            | -                                                           | ELISA                                                  | IgG                 | SP               | Sensitivity: 95.4%<br>Specificity: 98.3%                                                  |                                 |                                                                                                                       |
| Sims et al., 2020            | No            | -                                                           | ELISA                                                  | IgG                 | SP               | Sensitivity:99.35% (95% CI: 97.93-99.86%);<br>Specificity: 98.14% (95% CI: 97.75%-99.22%) |                                 |                                                                                                                       |
| Crovetto et al., 2020        | No            | -                                                           | ELISA                                                  | IgG, IgM, IgA       | -                |                                                                                           |                                 |                                                                                                                       |
| Gudbjartsson et al., 2020    |               |                                                             | CLIA                                                   | Total antibodies    | SP, NP           |                                                                                           |                                 | Positive results for both assays for a test result to be considered positive                                          |
|                              |               |                                                             | ELISA                                                  | Total antibodies    | SP, NP           |                                                                                           |                                 |                                                                                                                       |
| Naranbhai et al., 2020       |               |                                                             | LFIA                                                   | IgG, IgM            | -                | Sensitivity:<br>IgG:85%<br>IgM:80%<br>IgG or IgM:90%<br>Specificity: >99%                 |                                 |                                                                                                                       |
| Herzberg et al., 2020        | Yes           | -                                                           | ELISA                                                  | IgG                 | NP               |                                                                                           |                                 |                                                                                                                       |
| Dacosta-Urbieta et al., 2020 | No            | -                                                           | LFIA                                                   | IgG                 | -                |                                                                                           |                                 |                                                                                                                       |
|                              | No            | -                                                           | ELISA                                                  | IgG                 | SP               |                                                                                           |                                 |                                                                                                                       |

| Reference                    | Paired serums | Days from last possible exposure to sampling (median/range) | Assay methods (screening methods/confirmatory methods) | Antibodies measured     | Targeted antigen | Test performance (sensitivity, specificity)*                            | Reported positive cut-off value                                                                                                    | Comments                                    |
|------------------------------|---------------|-------------------------------------------------------------|--------------------------------------------------------|-------------------------|------------------|-------------------------------------------------------------------------|------------------------------------------------------------------------------------------------------------------------------------|---------------------------------------------|
| Lumley et al., 2020          |               |                                                             | PVNT                                                   | Neutralizing antibodies | -                | -                                                                       | -                                                                                                                                  | -                                           |
| Rudberg et al., 2020         | No            | -                                                           | Multiplexed microsphere-based assay                    | IgG                     | NP, SP           | Sensitivity: 99.4% Specificity: 99.1%                                   | Cutoff was defined as signals above the mean+6 SD                                                                                  | -                                           |
| Buntinx et al., 2020         | No            | -                                                           | LFIA                                                   | IgG, IgM                | -                | -                                                                       | -                                                                                                                                  | -                                           |
| Martin et al., 2020          | Yes           | -                                                           | ELISA                                                  | IgG                     | SP               | -                                                                       | -                                                                                                                                  | RT-PCR were also performed for participants |
| Amendola et al., 2020        | No            | -                                                           | ELISA                                                  | IgG                     | SP               | -                                                                       | -                                                                                                                                  | -                                           |
| Iversen et al., 2020         | No            | -                                                           | LFIA                                                   | IgG, IgM                | -                | Sensitivity: 82.5% Specificity: 99.5%                                   | -                                                                                                                                  | RT-PCR were also performed for participants |
| Olalla et al., 2020          | No            | -                                                           | LFIA                                                   | IgG                     | SP               | -                                                                       | -                                                                                                                                  | RT-PCR were also performed for participants |
| Cosma et al., 2020           | -             | -                                                           | LFIA                                                   | IgG, IgM                | SP, NP           | -                                                                       | The cut-off index (COI) in which a COI > 1.1 indicates a positive result.                                                          | RT-PCR were also performed for participants |
|                              | -             | -                                                           | CLIA                                                   | IgG                     | SP               | -                                                                       | The antibody concentration is expressed as arbitrary units (AU/mL) and grades the results as positive when $\geq 15$ AU/mL (CLIA). | RT-PCR were also performed for participants |
| Caban-Martinez et al., 2020  | No            | -                                                           | LFIA                                                   | IgG, IgM                | -                | -                                                                       | -                                                                                                                                  | -                                           |
| Poletti et al., 2020         | No            | -                                                           | CLIA                                                   | IgG                     | SP               | -                                                                       | A positive result (>15 AU/mL) indicates the presence of IgG antibodies                                                             | -                                           |
| Waterfield et al., 2020      | No            | -                                                           | CLIA                                                   | IgG, total antibodies   | NP, SP           | -                                                                       | Abbott: 1.4 S/C; Roche: 1.0 COI; DiaSorin: 15.0 AU/ml                                                                              | -                                           |
| Racine-Brzostek et al., 2020 | -             | -                                                           | Cyclic enhanced fluorescence assay                     | IgG, IgM                | -                | -                                                                       | -                                                                                                                                  | -                                           |
| Calcagno et al., 2020        | No            | -                                                           | CLIA                                                   | IgG                     | SP               | -                                                                       | -                                                                                                                                  | -                                           |
| Poustchi et al., 2020        |               |                                                             | ELISA                                                  | IgG, IgM                | -                | Sensitivity: IgG:61.0%, IgM:51.3%<br>Specificity: IgG:98.2%, IgM: 98.2% | -                                                                                                                                  | -                                           |

| Reference              | Paired serums | Days from last possible exposure to sampling (median/range) | Assay methods (screening methods/confirmatory methods) | Antibodies measured     | Targeted antigen | Test performance (sensitivity, specificity)*                                                                                                      | Reported positive cut-off value                                                              | Comments                                    |
|------------------------|---------------|-------------------------------------------------------------|--------------------------------------------------------|-------------------------|------------------|---------------------------------------------------------------------------------------------------------------------------------------------------|----------------------------------------------------------------------------------------------|---------------------------------------------|
| Cito et al., 2020      | No            | -                                                           | ELISA                                                  | Total antibodies        | SP               | -                                                                                                                                                 | A/CO values are >=1.0                                                                        | -                                           |
| Rosenberg et al., 2020 | No            | -                                                           | Microsphere immunoassay                                | IgG                     | NP               | Sensitivity: 87.9% (95%CI 83.7%-92.1%);<br>Specificity: 99.8%                                                                                     | The mean MFI (median fluorescence intensity) of 90-100 negative DBS was used to set cut-offs | -                                           |
| Daniel et al., 2020    | No            | 22 (IQR 15-26) days                                         | ELISA                                                  | Total antibodies        | SP               | -                                                                                                                                                 | The cut-off OD values of 1.0 were considered positive.                                       | RT-PCR were also performed for participants |
|                        |               |                                                             | MN                                                     | Neutralizing antibodies | -                | -                                                                                                                                                 | Titer > 1:40 were considered to be seropositive.                                             |                                             |
| Schmidt et al., 2020   | No            | -                                                           | ELISA                                                  | IgG                     | SP               | -                                                                                                                                                 | The cut-off OD values of 1.0 were considered positive                                        | -                                           |
| Moscola et al., 2020   | No            | -                                                           | ELISA                                                  | IgG                     | SP               | Sensitivity:<br>< 10 days after onset of symptoms: 33.3% (1/3)<br>> 10 days after onset of symptoms 80% (4/5);<br>Specificity:<br>98.5% (197/200) | -                                                                                            | -                                           |
|                        | No            | -                                                           | ELISA                                                  | IgG                     | NP, SP           | Sensitivity: 95% (19/20);<br>Sensitivity: 98.3% (118/120)                                                                                         | -                                                                                            | -                                           |
|                        | No            | -                                                           | CLIA                                                   | IgG                     | NP               | Sensitivity:<br>8-13 days: 91.18% (31/34)<br>>14 days: 100% (73/73);<br>Specificity:<br>99.63% (1066/1070)                                        | -                                                                                            | -                                           |
|                        | No            | -                                                           | Immunometric                                           | IgG                     | SP               | Sensitivity:<br>87.5% (42/48)<br>Specificity:<br>100% (407/407)                                                                                   | -                                                                                            | -                                           |
|                        | No            | -                                                           | Immunometric                                           | -                       | SP               | Sensitivity:<br>83.3% (30/36)<br>Specificity:<br>100% (400/400)                                                                                   | -                                                                                            | -                                           |

| Reference               | Paired serums | Days from last possible exposure to sampling (median/range) | Assay methods (screening methods/confirmatory methods) | Antibodies measured | Targeted antigen | Test performance (sensitivity, specificity)*                                                               | Reported positive cut-off value | Comments |
|-------------------------|---------------|-------------------------------------------------------------|--------------------------------------------------------|---------------------|------------------|------------------------------------------------------------------------------------------------------------|---------------------------------|----------|
|                         | No            |                                                             | CLIA                                                   | IgG                 | SP               | Sensitivity:<br>6-14 days: 89.80% (44/49)<br>>15 days: 97.56% (40/41)<br>Specificity:<br>99.3% (1082/1090) |                                 |          |
|                         | No            |                                                             | CLIA                                                   | -                   | NP               | Sensitivity:<br>7-13 days: 88.10% (52/59)<br>>14 days: 100% (29/29)<br>Specificity:<br>99.3% (5262/5272)   |                                 |          |
| Tarabichi et al., 2020  | Yes           | -                                                           | ELISA                                                  | IgG, IgM            | NP               | -                                                                                                          | -                               | -        |
| Rosser et al., 2020     | -             | -                                                           | ELISA                                                  | IgG                 | -                | -                                                                                                          | -                               | -        |
| Armin et al., 2020      | -             | -                                                           | LFIA                                                   | IgG, IgM            | -                | -                                                                                                          | -                               | -        |
| Montenegro et al., 2020 | -             | -                                                           | LFIA                                                   | IgG, IgM            | -                | -                                                                                                          | -                               | -        |
| Kaufman et al., 2020    | Yes           | -                                                           | CLIA/ELISA                                             | IgG, IgM, IgA       | NP, SP           | -                                                                                                          | -                               | -        |
| Ahmad et al., 2020      | No            | -                                                           | LFIA                                                   | IgG, IgM            | -                | -                                                                                                          | -                               | -        |
| Steensels et al., 2020  | No            | -                                                           | LFIA                                                   | IgG                 | NP               | Sensitivity: 92.2% Specificity: 97.0%                                                                      | -                               | -        |
| Mostafa et al., 2020    | No            | -                                                           | LFIA                                                   | IgG, IgM            | -                | -                                                                                                          | -                               | -        |
| Kantele et al., 2020    | No            | -                                                           | ELISA                                                  | IgG                 | SP               | -                                                                                                          | -                               | -        |

| Reference                   | Paired serums | Days from last possible exposure to sampling (median/range) | Assay methods (screening methods/confirmatory methods) | Antibodies measured | Targeted antigen | Test performance (sensitivity, specificity)*   | Reported positive cut-off value                                                                                                                                        | Comments                                                                           |
|-----------------------------|---------------|-------------------------------------------------------------|--------------------------------------------------------|---------------------|------------------|------------------------------------------------|------------------------------------------------------------------------------------------------------------------------------------------------------------------------|------------------------------------------------------------------------------------|
| Soriano et al., 2020        | No            | -                                                           | LFIA                                                   | IgG, IgM            | SP, NP           | -                                              | -                                                                                                                                                                      | -                                                                                  |
| Eyre et al., 2020           | No            | -                                                           | CLIA                                                   | IgG                 | NP               | -                                              | Abbott Architect (CLIA) with a manufacturer's signal-to-cut-off index of 1.4                                                                                           | -                                                                                  |
|                             |               |                                                             | ELISA                                                  | IgG                 | SP               | -                                              | Using net-normalized signal cut-off of 8 million as a positive cut-off for ELISA                                                                                       | -                                                                                  |
| Halatoko et al., 2020       | No            | -                                                           | LFIA                                                   | IgG, IgM            | -                | -                                              | -                                                                                                                                                                      | This test was validated by Laboratory Department of the ministry of health in Togo |
| Shields et al., 2020        | No            | -                                                           | ELISA                                                  | IgG, IgM, IgA       | SP               | -                                              | -                                                                                                                                                                      | RT-PCR were also performed for participants                                        |
| Makaronidis et al., 2020    | No            | -                                                           | LFIA                                                   | IgG, IgM            | -                | -                                              | -                                                                                                                                                                      | -                                                                                  |
| Guerrero et al., 2020       | No            | -                                                           | CLIA                                                   | IgG                 | NP               | -                                              | -                                                                                                                                                                      | -                                                                                  |
| Menachemi et al., 2020      | No            | -                                                           | CLIA                                                   | IgG                 | -                | -                                              | -                                                                                                                                                                      | -                                                                                  |
| Vilibic-Cavlek et al., 2020 | No            | -                                                           | ELISA                                                  | IgG                 | NP, SP           | -                                              | -                                                                                                                                                                      | -                                                                                  |
| Pollán et al., 2020         | No            | -                                                           | LFIA                                                   | IgG, IgM            | SP               | IgG:<br>Sensitivity: 82.1% Specificity: 100.0% | -                                                                                                                                                                      | -                                                                                  |
|                             | No            | -                                                           | CLIA                                                   | IgG                 | NP               | Sensitivity: 89.7%;<br>Specificity: 100.0%     | The amount of IgG antibodies to SARS-CoV-2 in each sample is determined by comparing its chemiluminescent relative light unit (RLU) to the calibrator RLU (index S/C). | -                                                                                  |
| Petersen et al., 2020       | No            | -                                                           | ELISA                                                  | IgG, IgM            | -                | -                                              | -                                                                                                                                                                      | -                                                                                  |
| Bajema et al., 2020         | No            | -                                                           | ELISA                                                  | IgG, IgM, IgA       | SP               | Sensitivity: 96.0%;<br>Specificity: 99.3%      | -                                                                                                                                                                      | -                                                                                  |
| Biggs et al., 2020          | No            | -                                                           | CLIA                                                   | Total antibodies    | SP               | Sensitivity: 93.2%;                            | -                                                                                                                                                                      | -                                                                                  |

| Reference              | Paired serums | Days from last possible exposure to sampling (median/range) | Assay methods (screening methods/confirmatory methods) | Antibodies measured     | Targeted antigen | Test performance (sensitivity, specificity)*                                     | Reported positive cut-off value                                                                                              | Comments                                                                                                                                                                                           |
|------------------------|---------------|-------------------------------------------------------------|--------------------------------------------------------|-------------------------|------------------|----------------------------------------------------------------------------------|------------------------------------------------------------------------------------------------------------------------------|----------------------------------------------------------------------------------------------------------------------------------------------------------------------------------------------------|
|                        |               |                                                             |                                                        |                         |                  | Specificity: 99.0%                                                               |                                                                                                                              |                                                                                                                                                                                                    |
| Sydney et al., 2020    | No            | -                                                           | CLIA                                                   | IgG                     | NP               |                                                                                  |                                                                                                                              |                                                                                                                                                                                                    |
| Brotans et al., 2020   | No            | -                                                           | LFIA                                                   | IgG, IgM                | -                |                                                                                  |                                                                                                                              |                                                                                                                                                                                                    |
| Hunter et al., 2020    | No            | -                                                           | CLIA                                                   | IgG                     | NP               |                                                                                  |                                                                                                                              |                                                                                                                                                                                                    |
| Tilley et al., 2020    | No            | -                                                           | ELISA                                                  | IgG                     | SP               |                                                                                  | Negative (ratio <0.8);<br>borderline (ratio .8 to <1.1); positive (ratio > 1.1)                                              |                                                                                                                                                                                                    |
| Tsatsaris et al., 2020 | No            | -                                                           | CLIA                                                   | IgG                     | NP               |                                                                                  | The results were considered positive if the IgG S/C index was $\geq 1.4$                                                     |                                                                                                                                                                                                    |
| Uyoga et al., 2020     | No            | -                                                           | ELISA                                                  | IgG                     | SP               | Sensitivity:92.7% (95% CI: 87.9-96.1%);<br>Specificity:99.0% (95% CI 98.1-99.5%) | An OD ratio >2                                                                                                               |                                                                                                                                                                                                    |
| Josè et al., 2020      | No            | -                                                           | CLIA                                                   | IgG, IgM                | NP, SP           |                                                                                  | IgG: The RLU-ratio of 1.1 positive were considered positive;<br>IgM: The RLU-ratio of 1.0 positive were considered positive; | RT-PCR were also performed for participants                                                                                                                                                        |
| Paderno et al., 2020   | No            | -                                                           | CLIA                                                   | IgG                     | SP               |                                                                                  |                                                                                                                              | RT-PCR were also performed for participants;<br>Positive cases were defined as those with positive IgG serology and/or positive nasal/ pharyngeal swab.                                            |
| Merkely et al., 2020   | No            | -                                                           | CLIA                                                   | IgG                     | NP               |                                                                                  |                                                                                                                              | RT-PCR were also performed for participants;                                                                                                                                                       |
| Addetia et al., 2020   | No            | -                                                           | CLIA                                                   | IgG                     | NP               |                                                                                  |                                                                                                                              | The presence of anti-Spike and neutralizing antibodies was analyzed in pre-departure sera samples from individuals that were positive in the Abbott assay screening through four different methods |
|                        |               |                                                             | NT                                                     | Neutralizing antibodies |                  |                                                                                  |                                                                                                                              |                                                                                                                                                                                                    |
| Ladhani et al., 2020   | No            | -                                                           | CLIA                                                   | IgG                     | NP               |                                                                                  |                                                                                                                              |                                                                                                                                                                                                    |
| Nailescu et al., 2020  | No            | -                                                           | ELISA                                                  | IgG, IgM                | SP               | Sensitivity: 94.4%;<br>Specificity: 98.5%                                        |                                                                                                                              |                                                                                                                                                                                                    |



| Reference                | Paired serums | Days from last possible exposure to sampling (median/range) | Assay methods (screening methods/confirmatory methods) | Antibodies measured | Targeted antigen | Test performance (sensitivity, specificity)* | Reported positive cut-off value                                                    | Comments                                    |
|--------------------------|---------------|-------------------------------------------------------------|--------------------------------------------------------|---------------------|------------------|----------------------------------------------|------------------------------------------------------------------------------------|---------------------------------------------|
| Sperotto et al., 2020    | No            | -                                                           | LFIA                                                   | IgG                 | -                | -                                            | -                                                                                  | -                                           |
|                          |               |                                                             | LFIA                                                   | IgG, IgM            | -                | -                                            | -                                                                                  | -                                           |
| Mack et al., 2020        | -             | -                                                           | ELISA, CLIA                                            | IgG, IgM            | NP, SP           | -                                            | -                                                                                  | -                                           |
| Belingheri et al., 2020  | No            | -                                                           | CLIA                                                   | IgG                 | SP               | -                                            | -                                                                                  | -                                           |
| Lastrucci et al., 2020   | No            | -                                                           | LFIA                                                   | IgG, IgM            | SP               | Sensitivity: 100.0%;<br>Specificity: 98.8%   | -                                                                                  | -                                           |
| Dioscoridi et al., 2020  | Yes           | -                                                           | ELISA                                                  | IgG, IgM            | -                | -                                            | -                                                                                  | -                                           |
| Péré et al., 2020        | -             | -                                                           | CLIA                                                   | IgG                 | NP               | -                                            | -                                                                                  | -                                           |
| Borges et al., 2020      | No            | -                                                           | LFIA                                                   | IgG, IgM            | -                | Sensitivity: 95%;<br>Specificity: 97%        | -                                                                                  | -                                           |
| Torres et al., 2020      | No            | -                                                           | LFIA                                                   | IgG, IgM            | -                | -                                            | -                                                                                  | -                                           |
| Poulikakos et al., 2020  | No            | -                                                           | CLIA                                                   | IgG                 | NP, SP           | -                                            | -                                                                                  | -                                           |
| Veerus et al., 2020      | -             | -                                                           | CLIA                                                   | IgG                 | NP               | -                                            | The IgG antibody level above 1.4 Index (S/C) was defined as a positive result.     | -                                           |
| Brunner et al., 2020     | No            | -                                                           | CLIA (Abbott Architect)                                | IgG                 | NP               | -                                            | -                                                                                  | -                                           |
|                          |               |                                                             | CLIA (Ortho-Clinical VITROS Diagnostics)               | IgG                 | SP               | -                                            | -                                                                                  | -                                           |
| Vijh et al., 2020        | No            | median: 50 days (IQR = 15)                                  | ELISA, CLIA                                            | Total antibodies    | NP, SP           | -                                            | -                                                                                  | -                                           |
| Rashid-Abdi et al., 2020 | Yes           | -                                                           | CLIA                                                   | IgG                 | NP               | -                                            | A signal/cut-off (S/C) ratio of $\geq 1.4$ was reported as positive                | -                                           |
| Stefanelli et al., 2020  | No            | -                                                           | CLIA                                                   | IgG                 | NP               | -                                            | An index of $\geq 1.4$ is interpreted as positive and index of $<1.4$ as negative. | -                                           |
| Feehan et al., 2020      | No            | -                                                           | CLIA                                                   | IgG                 | NP               | -                                            | -                                                                                  | RT-PCR were also performed for participants |

| Reference             | Paired serums | Days from last possible exposure to sampling (median/range) | Assay methods (screening methods/confirmatory methods) | Antibodies measured | Targeted antigen | Test performance (sensitivity, specificity)* | Reported positive cut-off value                                                                                                                 | Comments                                    |
|-----------------------|---------------|-------------------------------------------------------------|--------------------------------------------------------|---------------------|------------------|----------------------------------------------|-------------------------------------------------------------------------------------------------------------------------------------------------|---------------------------------------------|
| Sutton et al., 2020   | No            | -                                                           | CLIA                                                   | IgG                 | NP               | -                                            | -                                                                                                                                               | -                                           |
| Bampoe et al., 2020   | No            | -                                                           | CLIA                                                   | IgG                 | NP               | -                                            | A relative light index > 1.4 was considered to be a positive result                                                                             | -                                           |
| Cento et al., 2020    | No            | -                                                           | CLIA                                                   | IgG                 | NP               | -                                            | a signal/cut-off (S/Co) ratio $\geq 1.4$ was interpreted as reactive                                                                            | -                                           |
| Rivas et al., 2020    | No            | -                                                           | CLIA                                                   | IgG                 | NP               | -                                            | signal-to-cutoff ratio (SC/CO) $\geq 0.4$                                                                                                       | -                                           |
| Capasso et al., 2020  | -             | -                                                           | LFIA                                                   | IgG, IgM            | -                | -                                            | -                                                                                                                                               | -                                           |
| Murhekar et al., 2020 | No            | -                                                           | ELISA                                                  | IgG                 | -                | Sensitivity: 92.4%;<br>Specificity: 97.9%    | samples with optical density (OD) value more than the cut-off value and positive/negative (P/N) ratio more than 1.5 were considered as positive | -                                           |
| Tong et al., 2020     | No            | -                                                           | CLIA                                                   | IgG, IgM            | NP, SP           | -                                            | -                                                                                                                                               | -                                           |
| Iwuji et al., 2020    | No            | -                                                           | CLIA                                                   | IgG                 | NP               | -                                            | The threshold for a positive result was 1.4 Index.                                                                                              | -                                           |
| Mughal et al., 2020   | No            | -                                                           | LFIA                                                   | IgG, IgM            | -                | -                                            | -                                                                                                                                               | -                                           |
| Hallal et al., 2020   | No            | -                                                           | LFIA                                                   | IgG, IgM            | SP               | Sensitivity: 84.8% Specificity: 99.95%       | -                                                                                                                                               | appearance of a dark-colored line           |
| Delmas et al., 2020   | No            | -                                                           | CLIA                                                   | IgG                 | NP               | -                                            | -                                                                                                                                               | -                                           |
| Costa et al., 2020    | No            | -                                                           | LFIA                                                   | IgG, IgM            | SP               | -                                            | -                                                                                                                                               | -                                           |
| Zhang et al., 2020    | No            | -                                                           | ELISA                                                  | IgG, IgM, IgA       | SP               | -                                            | -                                                                                                                                               | RT-PCR were also performed for participants |
| Pan et al., 2020      | No            | -                                                           | LFIA                                                   | IgG, IgM            | -                | -                                            | -                                                                                                                                               | -                                           |
| Akinbami et al., 2020 | No            | -                                                           | CLIA                                                   | IgG                 | SP               | -                                            | Signal-to-cutoff ratio >1.0 was considered positive                                                                                             | -                                           |
| Kempen et al., 2020   | No            | -                                                           | CLIA                                                   | IgG                 | NP               | -                                            | -                                                                                                                                               | -                                           |
| Pagani et al., 2020   | -             | -                                                           | CLIA                                                   | IgG                 | NP               | -                                            | -                                                                                                                                               | -                                           |

| Reference                    | Paired serums | Days from last possible exposure to sampling (median/range) | Assay methods (screening methods/confirmatory methods) | Antibodies measured     | Targeted antigen | Test performance (sensitivity, specificity)* | Reported positive cut-off value                                                                                                                                                                             | Comments                                                                                                                                            |
|------------------------------|---------------|-------------------------------------------------------------|--------------------------------------------------------|-------------------------|------------------|----------------------------------------------|-------------------------------------------------------------------------------------------------------------------------------------------------------------------------------------------------------------|-----------------------------------------------------------------------------------------------------------------------------------------------------|
| Jespersen et al., 2020       | No            | -                                                           | ELISA                                                  | Total antibodies        | SP               | -                                            | The sample absorbance (A) value was divided by a cut- off (CO) value for the ELISA plate based on an average absorbance value for 3 negative kit controls. A/CO values $\geq 1.1$ were considered positive. | -                                                                                                                                                   |
| Ladhani et al., 2020         | No            | -                                                           | ELISA                                                  | IgG                     | NP, SP           | -                                            | -                                                                                                                                                                                                           | -                                                                                                                                                   |
|                              |               |                                                             | ELISA                                                  | IgG                     | NP, SP           | -                                            | -                                                                                                                                                                                                           | -                                                                                                                                                   |
| Yogo et al., 2020            | No            | -                                                           | CLIA                                                   | IgG, IgM, IgA           | NP               | -                                            | -                                                                                                                                                                                                           | -                                                                                                                                                   |
| Santos-Hövenner et al., 2020 | No            | -                                                           | ELISA                                                  | IgG                     | SP               | -                                            | ratio $\geq 1.1$                                                                                                                                                                                            | -                                                                                                                                                   |
| Alserehi et al., 2020        | No            | -                                                           | CLIA                                                   | IgG                     | NP               | -                                            | -                                                                                                                                                                                                           | -                                                                                                                                                   |
| Alali et al., 2020           | -             | -                                                           | LFIA                                                   | IgG, IgM                | -                | -                                            | -                                                                                                                                                                                                           | -                                                                                                                                                   |
| Del Brutto et al., 2020      | No            | -                                                           | LFIA                                                   | IgG, IgM                | -                | -                                            | -                                                                                                                                                                                                           | As IgM and IgG responses in SARS-CoV-2 develop with only a few days of difference, we defined seropositivity as a positive response to any of them. |
| Blairon et al., 2020         | No            | -                                                           | CLIA                                                   | IgG                     | SP               | Sensitivity: 100%                            | A positive result (>15 AU/mL) indicates the presence of IgG antibodies                                                                                                                                      | Confirmed by a semi-quantitative ELISA method                                                                                                       |
| Noh et al., 2020             | No            | -                                                           | CLIA                                                   | IgG                     | NP               | -                                            | A cutoff index (COI, signal sample/cutoff) of $\geq 1.0$ was considered positive                                                                                                                            | -                                                                                                                                                   |
|                              |               |                                                             | PRNT                                                   | Neutralizing antibodies | -                | -                                            | -                                                                                                                                                                                                           | -                                                                                                                                                   |
| Ho et al., 2020              | No            | -                                                           | CLIA                                                   | IgG, IgM                | NP               | -                                            | Samples with a reported COI greater than 1.0 are considered positivity                                                                                                                                      | -                                                                                                                                                   |
| Murakami et al., 2020        | No            | -                                                           | LFIA                                                   | IgG                     | -                | -                                            | -                                                                                                                                                                                                           | -                                                                                                                                                   |
| Lidström et al., 2020        | No            | -                                                           | CLIA                                                   | IgG                     | NP               | -                                            | A positive/ negative cut-off of 1.4 S/C was used in line with the manufacturer's instructions.                                                                                                              | -                                                                                                                                                   |
| Haizler-Cohen et al., 2020   | -             | -                                                           | CLIA                                                   | IgG                     | NP               | -                                            | -                                                                                                                                                                                                           | -                                                                                                                                                   |
| Martin et al., 2020          | No            | -                                                           | CLIA                                                   | IgG                     | NP               | -                                            | -                                                                                                                                                                                                           | -                                                                                                                                                   |
| Black et al., 2020           | No            | -                                                           | CLIA                                                   | IgG                     | NP               | -                                            | -                                                                                                                                                                                                           | -                                                                                                                                                   |

| Reference                 | Paired serums | Days from last possible exposure to sampling (median/range) | Assay methods (screening methods/confirmatory methods) | Antibodies measured | Targeted antigen | Test performance (sensitivity, specificity)*                                                                                                                | Reported positive cut-off value                                                                                                                       | Comments |
|---------------------------|---------------|-------------------------------------------------------------|--------------------------------------------------------|---------------------|------------------|-------------------------------------------------------------------------------------------------------------------------------------------------------------|-------------------------------------------------------------------------------------------------------------------------------------------------------|----------|
| Kassem et al., 2020       | No            | -                                                           | LFIA                                                   | IgG, IgM            | -                | -                                                                                                                                                           | -                                                                                                                                                     | -        |
| Hibino et al., 2020       | No            | -                                                           | CLIA                                                   | IgG                 | NP               | Sensitivity: 100%                                                                                                                                           | positivity cut-off index of 1.40.                                                                                                                     | -        |
| Predecki et al., 2020     | No            | -                                                           | CLIA, ELISA, LFIA                                      | IgG, IgM            | SP, NP           | Sensitivity:<br>Abbott-CLIA: 68.4% (51.3%–82.5%);<br>Fortress-ELISA: 92.1% (78.6%-98.3%);<br>LFIA: 84.2% (68.7%–94.0%)<br>Specificity:100.0% (92.3%–100.0%) | -                                                                                                                                                     | -        |
| Nsn et al., 2020          | No            | -                                                           | CLIA                                                   | IgG                 | -                | -                                                                                                                                                           | -                                                                                                                                                     | -        |
| Abdelmoniem et al., 2020  | -             | -                                                           | LFIA                                                   | IgG, IgM            | -                | -                                                                                                                                                           | -                                                                                                                                                     | -        |
| Pedersen et al., 2020     | No            | -                                                           | ELISA                                                  | Total antibodies    | SP               | Sensitivity: 96.7%; Specificity: 99.5%                                                                                                                      | -                                                                                                                                                     | -        |
| Dimcheff et al., 2020     | -             | -                                                           | CLIA                                                   | IgG                 | NP               | -                                                                                                                                                           | A value greater than or equal to 1.4 RLU is considered a positive antibody response.                                                                  | -        |
| Mesnil et al., 2020       | No            | -                                                           | CLIA                                                   | IgG                 | NP               | -                                                                                                                                                           | -                                                                                                                                                     | -        |
| Insúa et al., 2020        | No            | -                                                           | CLIA                                                   | IgG, IgM            | NP, SP           | -                                                                                                                                                           | ≥ 1 AU/mL was considered as reactive.                                                                                                                 | -        |
| Dimeglio et al., 2020     | No            | -                                                           | ELISA                                                  | Total antibodies    | SP               | -                                                                                                                                                           | -                                                                                                                                                     | -        |
| Mahajan et al., 2020      | No            | -                                                           | CLIA                                                   | IgG                 | SP               | -                                                                                                                                                           | Antibody levels were expressed as the ratio of the chemiluminescence signal over the cutoff (S/CO) value. An S/CO value≥1.00 was reported as positive | -        |
| Dodd et al., 2020         | -             | -                                                           | CLIA                                                   | Total antibodies    | SP               | -                                                                                                                                                           | -                                                                                                                                                     | -        |
| Martínez-Baz et al., 2020 | No            | -                                                           | CLIA                                                   | Total antibodies    | NP               | -                                                                                                                                                           | -                                                                                                                                                     | -        |

| Reference               | Paired serums | Days from last possible exposure to sampling (median/range) | Assay methods (screening methods/confirmatory methods) | Antibodies measured | Targeted antigen | Test performance (sensitivity, specificity)*                     | Reported positive cut-off value                                                                                                                                                                                           | Comments                                                                                   |
|-------------------------|---------------|-------------------------------------------------------------|--------------------------------------------------------|---------------------|------------------|------------------------------------------------------------------|---------------------------------------------------------------------------------------------------------------------------------------------------------------------------------------------------------------------------|--------------------------------------------------------------------------------------------|
| Anand et al., 2020      | No            | -                                                           | CLIA                                                   | Total antibodies    | SP               | -                                                                | -                                                                                                                                                                                                                         | -                                                                                          |
| Lundkvist et al., 2020  | No            | -                                                           | LFIA                                                   | IgG                 | -                | Sensitivity: 100.0%<br>Specificity:<br>IgG: 95.0%<br>IgM: 100.0% | -                                                                                                                                                                                                                         | -                                                                                          |
| Younas et al., 2020     | -             | -                                                           | CLIA                                                   | IgG, IgM, IgA       | NP               | -                                                                | Result reported as reactive if cutoff index (COI)>1.0 and non- reactive for COI<1.0                                                                                                                                       | Seropositive samples were confirmed by ELISA                                               |
| Gujski et al., 2020     | No            | -                                                           | ELISA                                                  | IgG, IgM, IgA       | NP, SP           | -                                                                | Samples with the anti-SARS-CoV-2 IgM+IgA index below 6 were considered negative, those with the index between 6 and 8 were considered indeterminate/equivocal, and those with the index above 8 were considered positive. | -                                                                                          |
| Malani et al., 2020     | No            | -                                                           | CLIA                                                   | IgG                 | NP               | -                                                                | -                                                                                                                                                                                                                         | -                                                                                          |
| Khan et al., 2020       | No            | -                                                           | CLIA                                                   | IgG                 | NP               | -                                                                | -                                                                                                                                                                                                                         | For quality control, a single sample of each control level was tested once every 24 hours. |
| Pray et al., 2020       | No            | -                                                           | CLIA                                                   | IgG                 | NP               | -                                                                | -                                                                                                                                                                                                                         | -                                                                                          |
| Bloomfield et al., 2020 | No            | -                                                           | CLIA                                                   | IgG, IgM, IgA       | NP               | -                                                                | -                                                                                                                                                                                                                         | -                                                                                          |
|                         |               |                                                             | ELISA                                                  | IgG, IgA            | SP               | -                                                                | -                                                                                                                                                                                                                         | -                                                                                          |
| Kumar et al., 2020      | No            | -                                                           | CLIA                                                   | Total antibodies    | NP               | -                                                                | -                                                                                                                                                                                                                         | -                                                                                          |
| Noor et al., 2020       | No            | -                                                           | CLIA                                                   | IgG, IgM            | NP               | -                                                                | The cut-off for significant antibodies level was taken as 1 or more as per manufacturer instruction.                                                                                                                      | -                                                                                          |
| Yamaki et al., 2020     | No            | -                                                           | CLIA                                                   | IgG                 | NP               | -                                                                | -                                                                                                                                                                                                                         | -                                                                                          |
| Bajema et al., 2020     | No            | -                                                           | CLIA                                                   | IgG, IgM, IgA       | NP, SP           | -                                                                | ARCHITECT-CLIA: a cutoff index of 1.4 or greater was considered seropositive<br>VITROS-CLIA: a cutoff index of 1.0 or greater was considered seropositive                                                                 | -                                                                                          |

| Reference                   | Paired serums | Days from last possible exposure to sampling (median/range) | Assay methods (screening methods/confirmatory methods) | Antibodies measured     | Targeted antigen | Test performance (sensitivity, specificity)*      | Reported positive cut-off value                                                                                                                                                   | Comments                                    |
|-----------------------------|---------------|-------------------------------------------------------------|--------------------------------------------------------|-------------------------|------------------|---------------------------------------------------|-----------------------------------------------------------------------------------------------------------------------------------------------------------------------------------|---------------------------------------------|
| Godbout et al., 2020        | No            | -                                                           | CLIA                                                   | IgG                     | NP               | -                                                 | -                                                                                                                                                                                 | -                                           |
| Silva et al., 2020          | No            | -                                                           | CLIA                                                   | IgG, IgM                | NP               | -                                                 | -                                                                                                                                                                                 | -                                           |
| Kumar et al., 2020          | No            | -                                                           | CLIA                                                   | IgG, IgM, IgA           | NP               | -                                                 | COI $\geq$ 1.0                                                                                                                                                                    | -                                           |
| Chau et al., 2020           | No            | -                                                           | CLIA                                                   | IgG, IgM, IgA           | NP               | -                                                 | -                                                                                                                                                                                 | -                                           |
| Preprint database           |               |                                                             |                                                        |                         |                  |                                                   |                                                                                                                                                                                   |                                             |
| Sughayer et al., 2020       | No            | -                                                           | CLIA                                                   | Total antibodies        | NP               | -                                                 | -                                                                                                                                                                                 | -                                           |
| Germain et al., 2020        | -             | -                                                           | ELISA                                                  | Total antibodies        | SP               | -                                                 | Wantai total antibodies positivity threshold $\geq$ 1.1                                                                                                                           | -                                           |
|                             |               |                                                             | CLIA                                                   | IgG                     | NP               | -                                                 | Abbott Architect IgG positivity threshold $\geq$ 1.4                                                                                                                              | -                                           |
| Martinez-Acuña et al., 2020 | No            | -                                                           | CLIA                                                   | IgG                     | NP               | -                                                 | An index S/C threshold of 1.5 or superior was taken as a positive result                                                                                                          | -                                           |
| McCulloch et al., 2020      | No            | -                                                           | ELISA                                                  | IgG, IgM, IgA           | SP               | -                                                 | Samples were considered seropositive if the anti-SARS-CoV-2 optical density (OD) spike was equal to or greater than a cutoff of 0.4.                                              | -                                           |
| Chang et al., 2020          | Yes           | -                                                           | ELISA                                                  | Total antibodies        | SP, NP           | -                                                 | Those IgG or IgM positive samples with the signal to the cutoff ratio (S/CO) $\geq$ 10 were further diluted (1:10, 1:40, 1:160..., and 1:40960 by normal saline and tested again. | -                                           |
|                             | Yes           | -                                                           | NT                                                     | Neutralizing antibodies | -                | -                                                 | An ID50 $\geq$ 20 was determined as a cutoff value for the presence of neutralizing antibodies.                                                                                   | -                                           |
| Li et al., 2020             | -             | -                                                           | CLIA                                                   | IgG, IgM                | SP, NP           | -                                                 | An S/CO value higher than 1.0 for either IgG or IgM was regarded as positive.                                                                                                     | -                                           |
| Xiong et al., 2020          | Yes           | 27-32 days                                                  | ELISA                                                  | IgG, IgM                | -                | -                                                 | -                                                                                                                                                                                 | RT-PCR were also performed for participants |
| Valenti et al., 2020        | No            | -                                                           | LFIA                                                   | IgG, IgM                | NP               | IgG:<br>Sensitivity: 100.0%<br>Specificity: 99.2% | -                                                                                                                                                                                 | -                                           |

| Reference               | Paired serums | Days from last possible exposure to sampling (median/range) | Assay methods (screening methods/confirmatory methods) | Antibodies measured     | Targeted antigen | Test performance (sensitivity, specificity)*                                                                   | Reported positive cut-off value                                                                                                                                                                                      | Comments                                                                                                                      |
|-------------------------|---------------|-------------------------------------------------------------|--------------------------------------------------------|-------------------------|------------------|----------------------------------------------------------------------------------------------------------------|----------------------------------------------------------------------------------------------------------------------------------------------------------------------------------------------------------------------|-------------------------------------------------------------------------------------------------------------------------------|
|                         |               |                                                             |                                                        |                         |                  | IgM:<br>Sensitivity: 68.0%<br>Specificity: 99.2%                                                               |                                                                                                                                                                                                                      |                                                                                                                               |
| Yu et al., 2020         | No            | -                                                           | CLIA                                                   | IgG, IgM                | NP, SP           | -                                                                                                              | -                                                                                                                                                                                                                    | -                                                                                                                             |
| Kuwelker et al., 2020   | No            | -                                                           | ELISA                                                  | IgG                     | SP               | -                                                                                                              | Endpoint titres were calculated as the reciprocal of the serum dilution giving an optical density (OD) value=3 standard deviations above the mean of historical pre-pandemic serum samples                           | Historical serum samples collected before 2019 were defined as seronegative in the RBD ELISA, which was confirmed with RT-PCR |
|                         |               |                                                             | MN                                                     | Neutralizing antibodies | -                | The MN titre was determined as the reciprocal of the serum dilution giving 50% inhibition of virus infectivity |                                                                                                                                                                                                                      |                                                                                                                               |
|                         |               |                                                             | NT                                                     | Neutralizing antibodies | -                | The VN titre was determined as the reciprocal of the highest serum dilution giving no CPE                      |                                                                                                                                                                                                                      |                                                                                                                               |
| Liu et al., 2020        | No            | ≥ 21 days                                                   | CLIA                                                   | IgG, IgM                | NP, SP           | -                                                                                                              | -                                                                                                                                                                                                                    | RT-PCR were also performed for participants                                                                                   |
|                         |               |                                                             | LFIA                                                   | IgG, IgM                | -                | -                                                                                                              |                                                                                                                                                                                                                      |                                                                                                                               |
| Kamath et al., 2020     | No            | -                                                           | Serum epitope repertoire analysis (SERA)               | IgG, IgM                | -                | Sensitivity: ≥91%;<br>Specificity: 98.7%                                                                       | -                                                                                                                                                                                                                    | -                                                                                                                             |
| Santana et al., 2020    | Yes           | -                                                           | CLIA                                                   | IgG, IgM                | NP, SP           | -                                                                                                              | -                                                                                                                                                                                                                    | -                                                                                                                             |
| Tubiana et al., 2020    |               | -                                                           | ELISA                                                  | IgG                     | NP, SP           | -                                                                                                              | -                                                                                                                                                                                                                    | -                                                                                                                             |
| Skowronski et al., 2020 | No            | -                                                           | CLIA                                                   | Total antibodies        | NP, SP           | -                                                                                                              | Resulted signal to cut-off (S/C) ratios of 1) ≥1.00 considered reactive for Ortho-Clinical Diagnostics; 2) ≥1.40 considered reactive for Abbott Laboratories; 3) ≥1.00 considered reactive for Siemens Healthineers; | All positive specimens were further assessed by gold-standard neutralization assay.                                           |
|                         |               |                                                             | MN                                                     | Neutralizing antibodies | -                | -                                                                                                              |                                                                                                                                                                                                                      |                                                                                                                               |
| Vu et al., 2020         | No            | -                                                           | Luciferase-linked immunosorbent assays (LuLISA)        | IgG                     | NP, SP           | Sensitivity: 86.0%<br>Specificity: 100%                                                                        | Serum samples are considered positive when the RLU value is above the threshold determined for each of the LuLISA IgG/N and IgG/S assays from a pre- pandemic serum collection                                       |                                                                                                                               |

| Reference             | Paired serums | Days from last possible exposure to sampling (median/range) | Assay methods (screening methods/confirmatory methods) | Antibodies measured     | Targeted antigen | Test performance (sensitivity, specificity)*                                                   | Reported positive cut-off value                                                                                                                                         | Comments                                                                                                                                                                                                                |
|-----------------------|---------------|-------------------------------------------------------------|--------------------------------------------------------|-------------------------|------------------|------------------------------------------------------------------------------------------------|-------------------------------------------------------------------------------------------------------------------------------------------------------------------------|-------------------------------------------------------------------------------------------------------------------------------------------------------------------------------------------------------------------------|
|                       |               |                                                             | PVNT                                                   | Neutralizing antibodies |                  | Sensitivity: 85.0%<br>Specificity: 100%                                                        | Samples are considered positive with RLU/s values below a threshold set as the mean minus 3-fold the standard deviation determined on a collection of pre-pandemic sera |                                                                                                                                                                                                                         |
| Dietrich et al., 2020 | Yes           | -                                                           | ELISA                                                  | IgG                     | SP               | -                                                                                              | Positive reactions were defined as a net OD reading > 0.7                                                                                                               |                                                                                                                                                                                                                         |
| Brehm et al., 2020    | Yes           | -                                                           | ELISA                                                  | IgG                     | SP               | Specificity: 99.1%                                                                             | OD ratio >1.5 were seropositive                                                                                                                                         |                                                                                                                                                                                                                         |
| Tang et al., 2020     | No            | -                                                           | LFIA                                                   | IgG, IgM                | -                | -                                                                                              | Both the control line and the test line appear simultaneously                                                                                                           | RT-PCR were also performed for participants                                                                                                                                                                             |
| Augusto et al., 2020  | No            | -                                                           | ELISA                                                  | IgG                     | SP               | -                                                                                              | -                                                                                                                                                                       | RT-PCR were also performed for participants                                                                                                                                                                             |
| Wang et al., 2020     | No            | -                                                           | CLIA                                                   | IgG, IgA, IgM           | NP, SP           | -                                                                                              | -                                                                                                                                                                       | RT-PCR were also performed for participants;<br>The detected chemiluminescent signal over background signal was calculated as relative light units (RLU), COI was the ratio of RLU to statistically determined cut-off. |
| Ling et al., 2020     | No            | -                                                           | LFIA                                                   | IgG, IgM                | -                | IgG:<br>Sensitivity: 86.7% Specificity: 98.0%<br>IgM:<br>Sensitivity: 76.2% Specificity: 99.0% | -                                                                                                                                                                       | RT-PCR were also performed for participants                                                                                                                                                                             |
| Paradiso et al., 2020 | Yes           | -                                                           | LFIA                                                   | IgG, IgM                | -                | -                                                                                              | The presence of SARS-CoV-2 IgG and IgM antibodies is indicated by a red/purple line that appears in the specific region                                                 | RT-PCR were also performed for participants                                                                                                                                                                             |
|                       |               |                                                             | CLIA                                                   | IgG, IgM                | -                | -                                                                                              | signal/cutoff (S/C) ratio was 1                                                                                                                                         |                                                                                                                                                                                                                         |
| Herzog et al., 2020   | -             | -                                                           | ELISA                                                  | IgG                     | SP               | -                                                                                              | The cut-off OD values of 1.1 and above were considered positive                                                                                                         |                                                                                                                                                                                                                         |
| Dopico et al., 2020   | No            | -                                                           | ELISA                                                  | IgG                     | SP               | -                                                                                              | -                                                                                                                                                                       |                                                                                                                                                                                                                         |
| Streeck et al., 2020  | -             | -                                                           | ELISA                                                  | IgG, IgA                | SP               | Specificity: 98.3%                                                                             | The cut-off OD values of 1.1 and above were considered positive.                                                                                                        | RT-PCR were also performed for participants                                                                                                                                                                             |
|                       |               |                                                             | NT                                                     | Neutralizing antibodies | -                | -                                                                                              | -                                                                                                                                                                       | RT-PCR were also performed for participants                                                                                                                                                                             |
| Doi et al., 2020      | No            | -                                                           | LFIA                                                   | IgG                     | -                | -                                                                                              | -                                                                                                                                                                       |                                                                                                                                                                                                                         |



| Reference             | Paired serums | Days from last possible exposure to sampling (median/range)   | Assay methods (screening methods/confirmatory methods) | Antibodies measured     | Targeted antigen | Test performance (sensitivity, specificity)*                                           | Reported positive cut-off value                                                                                                                                                                                             | Comments                                    |
|-----------------------|---------------|---------------------------------------------------------------|--------------------------------------------------------|-------------------------|------------------|----------------------------------------------------------------------------------------|-----------------------------------------------------------------------------------------------------------------------------------------------------------------------------------------------------------------------------|---------------------------------------------|
| Tosato et al., 2020   | No            | -                                                             | CLIA                                                   | IgG, IgM                | NP, SP           | -                                                                                      | ≥ 1.000 kAU/L were considered seropositive (IgM);<br>≥ 1.100 kAU/L were considered seropositive (IgG).                                                                                                                      | RT-PCR were also performed for participants |
| Carozzi et al., 2020  | No            | At least 14 days after a diagnostic PCR-positive assay result | LFIA                                                   | IgG, IgM                | -                | Sensitivity: 97.0%-99.0%<br>Specificity: 92.0%-95.0%                                   | Presence of the expected control line and of a line at the IgG or IgM position                                                                                                                                              | RT-PCR were also performed for participants |
| Siddiqui et al., 2020 | No            | -                                                             | CLIA                                                   | Total antibodies        | NP               | -                                                                                      | -                                                                                                                                                                                                                           | -                                           |
| Davis et al., 2020    | No            | -                                                             | LIFA                                                   | IgG, IgM                | SP               | Sensitivity: 89%<br>Specificity: 100%                                                  | -                                                                                                                                                                                                                           | -                                           |
| Kammon et al., 2020   | No            | -                                                             | LFIA                                                   | IgG, IgM                | -                | -                                                                                      | The presence of only the control line indicates a negative result and valid test; the presence of both the control line and the IgM or IgG antibody line indicates a positive result for IgM or IgG antibody, respectively. | -                                           |
| Wagner et al., 2020   | Yes           | -                                                             | ELISA                                                  | IgG, IgM, IgA           | SP               | -                                                                                      | -                                                                                                                                                                                                                           | -                                           |
| Bendavid et al., 2020 | No            | -                                                             | LFIA                                                   | IgG, IgM                | SP               | Sensitivity: 82.8%<br>(95%CI 76.0%-88.4%)<br>Specificity: 99.5%<br>(95%CI 99.2%-99.7%) | -                                                                                                                                                                                                                           | -                                           |
| Egerup et al., 2020   | -             | -                                                             | CLIA                                                   | IgG, IgM                | NP, SP           | -                                                                                      | A positive result was defined as values ≥ 8 AU/mL for IgM and ≥ 10 AU/mL for IgG                                                                                                                                            | -                                           |
| Krähling et al., 2020 | No            | -                                                             | ELISA                                                  | IgG                     | SP               | -                                                                                      | The cut-off value was calculated as the average of the OD values plus 4 standard deviations.                                                                                                                                | RT-PCR were also performed for participants |
|                       |               |                                                               | NT                                                     | Neutralizing antibodies | -                | -                                                                                      |                                                                                                                                                                                                                             |                                             |
| Richard et al., 2020  | No            | -                                                             | ELISA                                                  | IgG                     | SP               | Sensitivity: 93%<br>Specificity: 100%                                                  | cut off for positivity ≥ 1.1                                                                                                                                                                                                | -                                           |
| Nopsopon et al., 2020 | No            | -                                                             | LFIA                                                   | IgG, IgM                | -                | Sensitivity: 94.1%;<br>Specificity: 98.0%                                              | -                                                                                                                                                                                                                           | -                                           |
| Leidner et al., 2020  | No            | -                                                             | ELISA                                                  | IgG                     | NP               | Sensitivity: 80.0%;<br>Specificity: 100.0%                                             | -                                                                                                                                                                                                                           | -                                           |

| Reference                       | Paired serums | Days from last possible exposure to sampling (median/range) | Assay methods (screening methods/confirmatory methods) | Antibodies measured     | Targeted antigen | Test performance (sensitivity, specificity)*                                                        | Reported positive cut-off value                                                                                                                                                                               | Comments                                                                                                                                                                                           |
|---------------------------------|---------------|-------------------------------------------------------------|--------------------------------------------------------|-------------------------|------------------|-----------------------------------------------------------------------------------------------------|---------------------------------------------------------------------------------------------------------------------------------------------------------------------------------------------------------------|----------------------------------------------------------------------------------------------------------------------------------------------------------------------------------------------------|
| Halbrook et al., 2020           | No            | -                                                           | ELISA                                                  | IgG                     | SP               | -                                                                                                   | -                                                                                                                                                                                                             | -                                                                                                                                                                                                  |
| Fujita et al., 2020             | No            | -                                                           | ELISA                                                  | IgG                     | NP               | -                                                                                                   | -                                                                                                                                                                                                             | -                                                                                                                                                                                                  |
| Bal et al., 2020                | No            | -                                                           | ELISA                                                  | Total antibodies        | SP               | -                                                                                                   | -                                                                                                                                                                                                             | -                                                                                                                                                                                                  |
| Psichogiou et al., 2020         | No            | -                                                           | CLIA                                                   | IgG, IgM                | SP               | -                                                                                                   | -                                                                                                                                                                                                             | Samples were concluded as reactive if the IgM or the IgG or both bands were positive.                                                                                                              |
| Thomas et al., 2020             | No            | Days post symptom onset or exposure > 14                    | ELISA                                                  | Total antibodies        | SP               | Sensitivity: 100.0% (Days post symptom onset >14) Specificity: 100.0% (Days post symptom onset >14) | The Antibody Index (AI) was calculated by dividing each sample's OD450nm by the serum pooled control mean. Antibody indices were categorized as follows: Negative, ≤ 2.5; Equivocal, 2.51-4.0; Positive > 4.0 | -                                                                                                                                                                                                  |
| Woon et al., 2020               | No            | -                                                           | NT                                                     | Neutralizing antibodies | SP               | Sensitivity: 100%; Specificity: 100%                                                                | -                                                                                                                                                                                                             | -                                                                                                                                                                                                  |
| Cohen et al., 2020              | No            | -                                                           | CLIA                                                   | IgG, IgM                | -                | -                                                                                                   | -                                                                                                                                                                                                             | Positive serology was defined as a case positive for IgM and negative for IgG or positive for IgM and IgG or negative for IgM and positive for IgG.<br>RT-PCR were also performed for participants |
| Sikora et al., 2020             | No            | -                                                           | LFIA                                                   | IgG, IgM                | -                | -                                                                                                   | -                                                                                                                                                                                                             | -                                                                                                                                                                                                  |
| Galán et al., 2020              | No            | -                                                           | ELISA                                                  | IgG                     | NP, SP           | -                                                                                                   | The cut-off OD values of 1.1 and above were considered positive                                                                                                                                               | RT-PCR were also performed for participants                                                                                                                                                        |
| Garralda Fernandez et al., 2020 | No            | -                                                           | CLIA                                                   | IgG, IgM                | NP, SP           | -                                                                                                   | -                                                                                                                                                                                                             | RT-PCR were also performed for participants                                                                                                                                                        |
| Erber et al., 2020              | No            | -                                                           | CLIA                                                   | IgG                     | NP, SP           | -                                                                                                   | Values ≥10 AU/mL were considered positive                                                                                                                                                                     | -                                                                                                                                                                                                  |
| Garritsen et al., 2020          | No            | -                                                           | LFIA                                                   | IgG, IgM                | NP, SP           | Sensitivity:<br>IgM: 90.5%<br>IgG: 90.5%<br>Specificity:<br>IgM: 99%<br>IgG: 98%                    | IgG/IgM and control band were visible with the naked                                                                                                                                                          | -                                                                                                                                                                                                  |

| Reference              | Paired serums | Days from last possible exposure to sampling (median/range) | Assay methods (screening methods/confirmatory methods) | Antibodies measured     | Targeted antigen | Test performance (sensitivity, specificity)*                                                         | Reported positive cut-off value                                                                                             | Comments                                    |
|------------------------|---------------|-------------------------------------------------------------|--------------------------------------------------------|-------------------------|------------------|------------------------------------------------------------------------------------------------------|-----------------------------------------------------------------------------------------------------------------------------|---------------------------------------------|
| Snoeck et al., 2020    | No            | -                                                           | ELISA                                                  | IgG, IgA                | SP               | IgG:<br>Sensitivity: 85.7%<br>Specificity: 97.8%<br>IgA:<br>Sensitivity: 92.9%<br>Specificity: 89.2% | The cut-off OD values of 1.1 and above were considered positive                                                             | RT-PCR were also performed for participants |
| Comar et al., 2020     | No            | -                                                           | LFIA                                                   | IgG, IgM                | -                | Sensitivity: 95.6%<br>Specificity: 95.2%                                                             | -                                                                                                                           | RT-PCR were also performed for participants |
| Nisar et al., 2020     | No            | -                                                           | CLIA                                                   | IgG, IgM                | NP               | -                                                                                                    | -                                                                                                                           | -                                           |
| Wang et al., 2020      | -             | -                                                           | LFIA                                                   | IgG, IgM                | -                | Sensitivity:100.0%<br>Specificity: 100.0%                                                            | -                                                                                                                           | -                                           |
|                        |               |                                                             | NT                                                     | Neutralizing antibodies | -                | -                                                                                                    | A titer of 1:4 or higher indicated seropositivity                                                                           | -                                           |
| Lisandru et al., 2020  | -             | -                                                           | ELISA                                                  | IgG                     | SP               | -                                                                                                    | A result was considered borderline if the ratio was $\geq 0.8$ and $<1.1$ and positive if the sample ratio was $\geq 1.1$ . | -                                           |
| Zou et al., 2020       | No            | -                                                           | ELISA                                                  | IgG, IgM                | SP               | -                                                                                                    | -                                                                                                                           | -                                           |
| Nopsopon et al., 2020  | Yes           | -                                                           | LFIA                                                   | IgG, IgM                | -                | Sensitivity: 94.1%<br>Specificity: 98.0%                                                             | -                                                                                                                           | -                                           |
| McDade et al., 2020    | Yes           | -                                                           | ELISA                                                  | IgG                     | SP               | -                                                                                                    | -                                                                                                                           | RT-PCR were also performed for participants |
| Baker et al., 2020     | No            | -                                                           | ELISA                                                  | IgG                     | SP               | -                                                                                                    | -                                                                                                                           | -                                           |
| Appa et al., 2020      | No            | -                                                           | CLIA                                                   | IgG                     | NP               | -                                                                                                    | -                                                                                                                           | -                                           |
|                        |               |                                                             | ELISA                                                  | IgG                     | SP               | -                                                                                                    | -                                                                                                                           | -                                           |
|                        |               |                                                             | ELISA                                                  | IgG, IgA                | SP               | -                                                                                                    | -                                                                                                                           | -                                           |
|                        |               |                                                             | MN                                                     | Neutralizing antibodies | -                | -                                                                                                    | Titer >1:4 was considered positive                                                                                          | -                                           |
| Baxendale et al., 2020 | No            | -                                                           | Microsphere-based assay                                | IgG                     | NP, SP           | Sensitivity: 97%<br>Specificity: 100%                                                                | -                                                                                                                           | -                                           |
| Elli et al., 2020      | No            | -                                                           | ELISA                                                  | IgG, IgA                | NP, SP           | Sensitivity:<br>95%(IgG_antiSP),95%(IgG_antiNP),                                                     | -                                                                                                                           | -                                           |

| Reference               | Paired serums | Days from last possible exposure to sampling (median/range) | Assay methods (screening methods/confirmatory methods) | Antibodies measured     | Targeted antigen | Test performance (sensitivity, specificity)*                                                                             | Reported positive cut-off value                                                                                  | Comments                                                                                                                                                                      |
|-------------------------|---------------|-------------------------------------------------------------|--------------------------------------------------------|-------------------------|------------------|--------------------------------------------------------------------------------------------------------------------------|------------------------------------------------------------------------------------------------------------------|-------------------------------------------------------------------------------------------------------------------------------------------------------------------------------|
|                         |               |                                                             |                                                        |                         |                  | 95%(IgA_antiSP),69%(IgA_antiNP)<br>Specificity:<br>97%(IgG_antiSP),91%(IgG_antiNP),<br>91.5%(IgA_antiSP),85%(IgA_antiNP) |                                                                                                                  |                                                                                                                                                                               |
| Takita et al., 2020     | No            |                                                             | LFIA                                                   | IgG                     |                  | Sensitivity: 76.4%<br>Specificity: 100.0%                                                                                |                                                                                                                  |                                                                                                                                                                               |
| Tönshoff et al., 2020   |               |                                                             | ELISA                                                  | IgG                     |                  |                                                                                                                          |                                                                                                                  | Unclear or discordant results were further assessed by CLIA or a second ELISA                                                                                                 |
|                         |               |                                                             | IFA                                                    | IgG                     |                  |                                                                                                                          |                                                                                                                  |                                                                                                                                                                               |
|                         |               |                                                             | NT                                                     | Neutralizing antibodies |                  |                                                                                                                          |                                                                                                                  |                                                                                                                                                                               |
| Mortgat et al., 2020    |               | 27 (11-56) days                                             | ELISA                                                  | IgG                     | SP               |                                                                                                                          | Sera were considered positive at an S/N ratio $\geq 1.1$ , as suggested by the manufacturer                      |                                                                                                                                                                               |
| Jerković et al., 2020   | No            |                                                             | LFIA                                                   | IgG, IgM                |                  |                                                                                                                          |                                                                                                                  |                                                                                                                                                                               |
| Alessandro et al., 2020 | No            |                                                             | CLIA                                                   | IgG                     | SP               |                                                                                                                          | Positive or negative results were established by the following cuts off:<br><12: Negative; $\geq 15$ : positive. |                                                                                                                                                                               |
| Dillner et al., 2020    |               |                                                             | Microsphere-based assay                                | IgG                     | NP, SP           | Sensitivity: 99.2%<br>Specificity: 99.8%                                                                                 |                                                                                                                  |                                                                                                                                                                               |
| Alemu et al., 2020      |               |                                                             | LFIA                                                   | IgG, IgM                |                  | IgG:<br>Sensitivity: 69.00%<br>Specificity: 100%<br>IgM:<br>Sensitivity: 93.1%<br>Specificity: 99.2%                     |                                                                                                                  |                                                                                                                                                                               |
| Aziz et al., 2020       |               |                                                             | ELISA                                                  | IgG                     | SP               |                                                                                                                          | cut-off of >1.1                                                                                                  | Two additional confirmatory tests in all those individuals whose ELISA assay results were either positive (i.e. >1.1) or borderline (i.e. between 0.8 and 1.1) were performed |
|                         |               |                                                             | IFA                                                    |                         |                  |                                                                                                                          |                                                                                                                  |                                                                                                                                                                               |
|                         |               |                                                             | PRNT                                                   | Neutralizing antibodies |                  |                                                                                                                          |                                                                                                                  |                                                                                                                                                                               |

| Reference                   | Paired serums | Days from last possible exposure to sampling (median/range) | Assay methods (screening methods/confirmatory methods) | Antibodies measured                   | Targeted antigen | Test performance (sensitivity, specificity)*                                             | Reported positive cut-off value                                                                                                                                                                                                             | Comments                                                                    |
|-----------------------------|---------------|-------------------------------------------------------------|--------------------------------------------------------|---------------------------------------|------------------|------------------------------------------------------------------------------------------|---------------------------------------------------------------------------------------------------------------------------------------------------------------------------------------------------------------------------------------------|-----------------------------------------------------------------------------|
| Chamie et al., 2020         | No            | -                                                           | CLIA                                                   | IgG                                   | NP               | -                                                                                        | -                                                                                                                                                                                                                                           | RT-PCR were also performed for participants                                 |
| Nesbitt et al., 2020        | No            | -                                                           | LFIA                                                   | IgG, IgM                              | -                | -                                                                                        | -                                                                                                                                                                                                                                           | -                                                                           |
|                             |               |                                                             | CLIA                                                   | Total antibodies                      | SP               | -                                                                                        | -                                                                                                                                                                                                                                           | -                                                                           |
| Wells et al., 2020          | No            | -                                                           | ELISA                                                  | IgG                                   | SP, NP           | Sensitivity: 90.0%<br>(95%CI 60.0%-99.0%)<br>Specificity: 100.0%<br>(95%CI 93.0%-100.0%) | A participant was considered seropositive if an IgG response (OD value) to both N and S was detected that was 4-fold above the background of the assay. This cut-off is based on the analysis of 300+ pre-COVID-19 serum samples            | RT-PCR were also performed for participants                                 |
| Fontanet et al., 2020       | No            | -                                                           | Flow cytometry                                         | -                                     | SP               | -                                                                                        | -                                                                                                                                                                                                                                           | -                                                                           |
| Anna et al., 2020           | -             | -                                                           | Luciferase-linked immunosorbent assays (LuLISA)        | IgG                                   | SP               | Specificity: 98.0%                                                                       | -                                                                                                                                                                                                                                           | -                                                                           |
|                             |               |                                                             | PVNT                                                   | -                                     | SP               | Specificity: 99.0%                                                                       | -                                                                                                                                                                                                                                           | -                                                                           |
| Sandri et al., 2020         | No            | -                                                           | CLIA                                                   | IgG                                   | SP               | -                                                                                        | Truly positive: >15.0 AU/mL; positive: ≥ 12.0 AU/mL                                                                                                                                                                                         | -                                                                           |
| Calife et al., 2020         | -             | -                                                           | CLIA                                                   | IgG, IgM                              | NP               | -                                                                                        | -                                                                                                                                                                                                                                           | -                                                                           |
| Brant et al., 2020          | No            | -                                                           | CLIA                                                   | IgG                                   | SP               | -                                                                                        | -                                                                                                                                                                                                                                           | -                                                                           |
| Brant-Zawadzki et al., 2020 | No            | -                                                           | CLIA                                                   | IgG                                   | SP               | Sensitivity: 93.6% (95%CI: 78.6–99.2%)<br>Specificity: 100%<br>(95% CI: 92.9–100.0%)     | -                                                                                                                                                                                                                                           | -                                                                           |
| Jones et al., 2020          | No            | -                                                           | CLIA                                                   | IgG                                   | NP               | -                                                                                        | -                                                                                                                                                                                                                                           | -                                                                           |
| Li et al., 2020             | No            | -                                                           | CLIA                                                   | IgG, IgM                              | NP, SP           | -                                                                                        | -                                                                                                                                                                                                                                           | An S/CO value higher than 1 for either IgG or IgM was considered positive   |
| Barallat et al., 2020       | No            | -                                                           | CLIA                                                   | IgG (spike);<br>IgG<br>(nucleocapsid) | NP, SP           | -                                                                                        | IgG (spike): > 15.0 AU/mL were considered positive;<br>IgG (nucleocapsid): antibody levels were expressed as the ratio of the chemiluminescence signal over the cutoff (S/CO) value. An S/CO value higher than 1.4 for either IgG positive. | -                                                                           |
| Tess et al., 2020           | No            | -                                                           | CLIA                                                   | IgG, IgM                              | NP, SP           | -                                                                                        | IgG: reagent >1.1 UA/mL,<br>IgM: reagent >1.0UA/mL                                                                                                                                                                                          | Individuals who were reactive to either IgM or IgG were considered positive |

| Reference                  | Paired serums | Days from last possible exposure to sampling (median/range) | Assay methods (screening methods/confirmatory methods) | Antibodies measured     | Targeted antigen | Test performance (sensitivity, specificity)* | Reported positive cut-off value                                                                                                     | Comments                                    |
|----------------------------|---------------|-------------------------------------------------------------|--------------------------------------------------------|-------------------------|------------------|----------------------------------------------|-------------------------------------------------------------------------------------------------------------------------------------|---------------------------------------------|
| Mattern et al., 2020       | No            | -                                                           | CLIA                                                   | IgG                     | NP               | -                                            | Positive if the IgG index value was 1.40                                                                                            | RT-PCR were also performed for participants |
| Carrat et al., 2020        | -             | -                                                           | ELISA                                                  | IgG                     | NP, SP           | -                                            | ELISA-positive with an optical density ratio $\geq 1.1$                                                                             | -                                           |
|                            |               |                                                             | Neutralization assay                                   | Neutralizing antibodies | -                | -                                            | Positive was defined as a titer $\geq 40$                                                                                           | -                                           |
| Samore et al., 2020        | -             | -                                                           | CLIA                                                   | IgG                     | NP               | Sensitivity: 83%                             | as positive (ratio >1.4) or negative (ratio <1.4)                                                                                   | -                                           |
| Dupraz et al., 2020        | No            | -                                                           | Luminex immunoassay                                    | IgG                     | SP               | Sensitivity: 96.7%<br>Specificity: 99.2%     | at an antibody Multiplex Fluorescent Immunoassay (MFI) ratio of $\geq 6$                                                            | -                                           |
| Royo-Cebrecos et al., 2020 | No            | -                                                           | LIFA                                                   | IgG, IgM                | -                | Sensitivity: 92%<br>Specificity: 100%        | -                                                                                                                                   | -                                           |
| McLaughlin et al., 2020    | No            | -                                                           | CLIA                                                   | IgG                     | NP               | -                                            | -                                                                                                                                   | -                                           |
| Rauber et al., 2020        | -             | -                                                           | ELISA                                                  | IgG                     | -                | -                                            | -                                                                                                                                   | -                                           |
| McBride et al., 2020       | No            | -                                                           | CLIA                                                   | IgG                     | NP               | -                                            | -                                                                                                                                   | -                                           |
| Jögi et al., 2020          | -             | -                                                           | CLIA                                                   | IgG                     | NP               | -                                            | signal/cut-off ratio 0.3 to 1.39                                                                                                    | -                                           |
| Ebinger et al., 2020       | No            | -                                                           | CLIA                                                   | IgG                     | NP               | -                                            | Manufacturer's signal-to-cut-off index of 1.4                                                                                       | -                                           |
| Hurk et al., 2020          | No            | -                                                           | ELISA                                                  | Total antibodies        | SP               | Sensitivity: 98.7%<br>Specificity: 99.6%     | OD/CO ratio >1.0 were considered positive                                                                                           | -                                           |
| Hassan et al., 2020        | No            | -                                                           | A multiplex antigen bead array                         | IgG                     | NP, SP           | Sensitivity: 99.2%<br>Specificity: 99.8%     | -                                                                                                                                   | -                                           |
| Weis et al., 2020          | No            | -                                                           | ELISA                                                  | IgG                     | -                | -                                            | -                                                                                                                                   | -                                           |
|                            |               |                                                             | CLIA                                                   | IgG                     | -                | -                                            | -                                                                                                                                   | -                                           |
| Rigatti et al., 2020       | -             | -                                                           | CLIA                                                   | Total antibodies        | NP               | -                                            | -                                                                                                                                   | -                                           |
| Faniyi et al., 2020        | -             | -                                                           | ELISA                                                  | Total antibodies        | SP               | -                                            | Samples with mean OD450nm plus 2 standard deviations (+2SD) above pre-2019 negative serum control samples were reported as positive | -                                           |

| Reference                | Paired serums | Days from last possible exposure to sampling (median/range) | Assay methods (screening methods/confirmatory methods) | Antibodies measured | Targeted antigen | Test performance (sensitivity, specificity)* | Reported positive cut-off value                                                                                                     | Comments |
|--------------------------|---------------|-------------------------------------------------------------|--------------------------------------------------------|---------------------|------------------|----------------------------------------------|-------------------------------------------------------------------------------------------------------------------------------------|----------|
| Stout et al., 2020       | No            | -                                                           | CLIA                                                   | Total antibodies    | NP               | -                                            | -                                                                                                                                   | -        |
| Gomes et al., 2020       | No            | -                                                           | LFIA                                                   | IgG, IgM            | -                | -                                            | -                                                                                                                                   | -        |
| Wu et al., 2020          | No            | -                                                           | LFIA/CLIA                                              | IgG, IgM            | -                | -                                            | -                                                                                                                                   | -        |
| Rebeiro et al., 2020     | No            | -                                                           | CLIA                                                   | IgG                 | NP               | -                                            | -                                                                                                                                   | -        |
| Schubl et al., 2020      | No            | -                                                           | A novel coronavirus antigen microarray (CoVAM)         | IgG, IgM            | -                | -                                            | -                                                                                                                                   | -        |
| Majdoubi et al., 2020    | -             | -                                                           | CLIA                                                   | Total antibodies    | SP               | -                                            | -                                                                                                                                   | -        |
| Nakamura et al., 2020    | No            | -                                                           | CLIA (Abbott)                                          | IgG                 | NP               | -                                            | -                                                                                                                                   | -        |
|                          |               |                                                             | CLIA (Roche)                                           | Total antibodies    | NP               | -                                            | -                                                                                                                                   |          |
|                          |               |                                                             | LFIA                                                   | IgG, IgM            | NP               | -                                            | -                                                                                                                                   |          |
| Tsertsvadze et al., 2020 | -             | -                                                           | LFIA                                                   | IgG                 | -                | -                                            | -                                                                                                                                   | -        |
| Reuben et al., 2020      | No            | -                                                           | CLIA                                                   | IgG                 | SP               | -                                            | -                                                                                                                                   | -        |
| Bahrs et al., 2020       | -             | -                                                           | ELISA                                                  | IgG                 | NP               | -                                            | -                                                                                                                                   | -        |
|                          |               |                                                             | CLIA                                                   | IgG                 | NP               | -                                            | -                                                                                                                                   |          |
| Chibwana et al., 2020    | No            | -                                                           | ELISA                                                  | IgG                 | SP, NP           | -                                            | The assay interpretation was as follows; positive result (OD 0.6), indeterminate result (OD 0.55 to < 0.6) and negative (OD < 0.55) | -        |
| Laub et al., 2020        | -             | -                                                           | CLIA                                                   | Total antibodies    | SP, NP           | -                                            | -                                                                                                                                   | -        |
|                          |               |                                                             | ELISA                                                  | IgG                 |                  |                                              |                                                                                                                                     |          |
| Armann et al., 2020      | No            | -                                                           | CLIA                                                   | IgG                 | SP               | -                                            | Antibody levels > 15.0 AU/ml were considered positive                                                                               | -        |
| Hibino et al., 2020      | Yes           | -                                                           | LFIA                                                   | IgG, IgM            | -                | -                                            | -                                                                                                                                   | -        |
| Barchuk et al., 2020     | No            | -                                                           | CLIA                                                   | IgG                 | NP               | -                                            | Cut off for positivity 1.4                                                                                                          | -        |
|                          |               |                                                             | ELISA                                                  | Total antibodies    | SP               | -                                            | cutoff for positivity 1.0                                                                                                           |          |

| Reference                 | Paired serums | Days from last possible exposure to sampling (median/range) | Assay methods (screening methods/confirmatory methods) | Antibodies measured     | Targeted antigen | Test performance (sensitivity, specificity)* | Reported positive cut-off value                                                                                                                             | Comments                                    |
|---------------------------|---------------|-------------------------------------------------------------|--------------------------------------------------------|-------------------------|------------------|----------------------------------------------|-------------------------------------------------------------------------------------------------------------------------------------------------------------|---------------------------------------------|
| Wilkins et al., 2020      | -             | -                                                           | CLIA                                                   | IgG                     | NP               | -                                            | -                                                                                                                                                           | -                                           |
| Abo-Leyah et al., 2020    | -             | -                                                           | CLIA                                                   | IgG                     | SP               | -                                            | -                                                                                                                                                           | -                                           |
| Vince et al., 2020        | Yes           | -                                                           | ELISA                                                  | IgG, IgA                | NP, SP           | -                                            | OD ratio $\geq 1.1$                                                                                                                                         | -                                           |
| Alkurt et al., 2020       | No            | -                                                           | CLIA                                                   | IgG                     | NP               | -                                            | Cut-off value of 1.40 S/C was considered positive                                                                                                           | -                                           |
| Vassallo et al., 2020     | -             | -                                                           | CLIA                                                   | IgG, IgM, IgA           | SP               | -                                            | Results with signal-to-cutoff (S/C) ratios $\geq 1$ are reported as positive                                                                                | -                                           |
| Melo et al., 2020         | -             | -                                                           | IFA                                                    | IgG, IgM                | -                | -                                            | -                                                                                                                                                           | -                                           |
| Favara et al., 2020       | No            | -                                                           | LFIA                                                   | IgG, IgM                | NP, SP           | -                                            | -                                                                                                                                                           | RT-PCR were also performed for participants |
|                           |               |                                                             | Microsphere-based assay                                | IgG                     | NP, SP           | -                                            | -                                                                                                                                                           |                                             |
| Remes-Troche et al., 2020 | -             | -                                                           | CLIA                                                   | IgG                     | NP               | -                                            | -                                                                                                                                                           | -                                           |
| Ladage et al., 2020       | No            | -                                                           | LIFA                                                   | IgG, IgM                | -                | Sensitivity: 31%<br>Specificity: 99%         | -                                                                                                                                                           | -                                           |
|                           |               |                                                             | ELISA                                                  | IgG, IgA                | -                | -                                            |                                                                                                                                                             |                                             |
| Silva et al., 2020        | -             | -                                                           | ELISA                                                  | IgG                     | SP               | Sensitivity: 74.0%<br>Specificity: 100.0%    | -                                                                                                                                                           | -                                           |
| Craigie et al., 2020      | -             | 14 weeks (range 11-17 weeks).                               | CLIA/ELISA                                             | IgG                     | NP               | -                                            | Abbott-CLIA $\geq 1.40$ S/C,<br>In-house-ELISA: $\geq 0.2$ OD(RBD)/ $\geq 300$ titer (spike) Wantai ELISA $\geq 1$ A/C.O, Euroimmun-ELISA $\geq 1.1$ ratio, | -                                           |
|                           |               |                                                             | NT                                                     | Neutralizing antibodies | -                | NT $\geq 20$ inhibition                      |                                                                                                                                                             |                                             |
| Silva et al., 2020        | -             | -                                                           | LFIA                                                   | IgG, IgM                | SP               | -                                            | -                                                                                                                                                           | -                                           |
| Strazzulla et al.         | No            | -                                                           | CLIA                                                   | Total antibodies        | NP               | -                                            | -                                                                                                                                                           | -                                           |
| Ray et al., 2020          | No            | -                                                           | ELISA                                                  | IgG                     | SP               | Sensitivity: 88.2%<br>Specificity: 99.8%     | -                                                                                                                                                           | -                                           |



| Reference            | Paired serums | Days from last possible exposure to sampling (median/range) | Assay methods (screening methods/confirmatory methods) | Antibodies measured     | Targeted antigen | Test performance (sensitivity, specificity)*                                           | Reported positive cut-off value                                                                                               | Comments |
|----------------------|---------------|-------------------------------------------------------------|--------------------------------------------------------|-------------------------|------------------|----------------------------------------------------------------------------------------|-------------------------------------------------------------------------------------------------------------------------------|----------|
| Bardai et al., 2020  | -             | -                                                           | ELISA                                                  | IgG                     | NP, SP           |                                                                                        |                                                                                                                               |          |
| Cooper et al., 2020  | No            | -                                                           | CLIA                                                   | Total antibodies        | SP               |                                                                                        | Index Values >= 1.0 are reported as reactive                                                                                  |          |
| Hommel et al., 2020  | No            | -                                                           | ELISA                                                  | IgG                     | SP               |                                                                                        |                                                                                                                               |          |
| Nishida et al., 2020 | -             | -                                                           | CLIA                                                   | IgG                     | NP               |                                                                                        |                                                                                                                               |          |
| Nawa et al., 2020    | No            | -                                                           | CLIA                                                   | IgG                     | NP, SP           |                                                                                        | A cut-off value of 10 AU/ml was considered positive                                                                           |          |
| Qutob et al., 2020   | -             | -                                                           | CLIA                                                   | Total antibodies        | NP               |                                                                                        |                                                                                                                               |          |
| Khan et al., 2020    | -             | -                                                           | CLIA                                                   | IgG                     | NP               |                                                                                        | The test result was considered positive for SARS-CoV-2 IgG if the index value was $\geq 1.4$ as provided by the manufacturer. |          |
| Haq et al., 2020     | -             | -                                                           | CLIA                                                   | Total antibodies        | NP               |                                                                                        | 1 AU/ml and less than 1 AU/ml was considered Negative and more than or equal to 1AU/ml as positive.                           |          |
| Jin et al., 2020     |               |                                                             | CLIA (Ortho-Clinical VITROS Diagnostics)               | Total antibodies        | SP               |                                                                                        |                                                                                                                               |          |
|                      |               |                                                             | CLIA (Abbott Architect)                                | IgG                     | NP               |                                                                                        |                                                                                                                               |          |
|                      |               |                                                             | NT                                                     | Neutralizing antibodies | -                |                                                                                        |                                                                                                                               |          |
| Ulyte et al., 2020   | Yes           | -                                                           | multiplex, microsphere-based assay                     | IgG, IgM, IgA           | NP, SP           | Sensitivity:94.3%<br>Specificity: 99%                                                  |                                                                                                                               |          |
| Asuquo et al., 2020  | No            | -                                                           | LFIA                                                   | IgG, IgM                | SP               |                                                                                        |                                                                                                                               |          |
| Ward et al., 2020    | No            | -                                                           | LFIA                                                   | IgG                     | -                | Sensitivity: 84.4%<br>Specificity: 98.0%                                               |                                                                                                                               |          |
| Menezes et al., 2020 | No            | -                                                           | LFIA                                                   | IgG, IgM                | -                | Sensitivity: 77.1%<br>Specificity: 98.0%                                               |                                                                                                                               |          |
| Laursen et al., 2020 | -             | -                                                           | LFIA                                                   | IgG, IgM                | -                | Sensitivity: 82.58% (95% CI: 75.7%-88.2%)<br>Specificity: 99.54% (95% CI: 98.7%-99.9%) |                                                                                                                               |          |

| Reference                 | Paired serums | Days from last possible exposure to sampling (median/range) | Assay methods (screening methods/confirmatory methods) | Antibodies measured | Targeted antigen | Test performance (sensitivity, specificity)* | Reported positive cut-off value                                                                     | Comments |
|---------------------------|---------------|-------------------------------------------------------------|--------------------------------------------------------|---------------------|------------------|----------------------------------------------|-----------------------------------------------------------------------------------------------------|----------|
| Kahlert et al., 2020      | No            | -                                                           | CLIA                                                   | Total antibodies    | NP               | -                                            | A cut-off index, COI, > 1                                                                           | -        |
| ROEDERER et al., 2020     | -             | -                                                           | Luciferase-linked immunosorbent assays (LuLISA)        | Total antibodies    | NP, SP           | -                                            | -                                                                                                   | -        |
| Demonbreun et al., 2020   | No            | -                                                           | CLIA                                                   | IgG                 | SP               | -                                            | A value >0.39µg/ml was considered positive.                                                         | -        |
| Ariza et al., 2020        | Yes           | -                                                           | CLIA                                                   | IgG                 | NP               | -                                            | Samples with a signal- to-cutoff (S/CO) ratio greater than or equal to 1.4 were considered positive | -        |
| Majiya et al., 2020       | No            | -                                                           | LFIA                                                   | IgG, IgM            | -                | Sensitivity: 100.0%<br>Specificity: 100.0%   | -                                                                                                   | -        |
| Javed et al., 2020        | No            | -                                                           | LFIA                                                   | IgG, IgM            | -                | -                                            | -                                                                                                   | -        |
| Buonsenso et al., 2020    | No            | -                                                           | ELISA                                                  | IgG                 | NP, SP           | -                                            | -                                                                                                   | -        |
| Kasztelewicz et al., 2020 | No            | -                                                           | CLIA                                                   | IgG                 | NP               | -                                            | S/CO ratio of ≥1.40                                                                                 | -        |
| Malecki et al., 2020      | No            | -                                                           | CLIA                                                   | IgG                 | NP               | -                                            | -                                                                                                   | -        |
| FUKUDA et al., 2020       | No            | -                                                           | CLIA                                                   | IgG, IgM, IgA       | NP               | -                                            | COI ≥ 1.0                                                                                           | -        |
| Díaz-Salazar et al., 2020 | No            | -                                                           | CLIA                                                   | IgG, IgM            | NP               | -                                            | -                                                                                                   | -        |
| Bruckner et al., 2020     | -             | -                                                           | coronavirus antigen microarray                         | IgG, IgM            | NP, SP           | Sensitivity: 94.0%<br>Specificity: 100.0%    | -                                                                                                   | -        |
| Goenka et al., 2020       | -             | -                                                           | CLIA                                                   | IgG                 | SP               | -                                            | -                                                                                                   | -        |
| Flemand et al., 2020      | -             | -                                                           | ELISA                                                  | IgG                 | SP               | Sensitivity: 75-93.8%<br>Specificity: 97.9%  | -                                                                                                   | -        |

| Reference                | Paired serums | Days from last possible exposure to sampling (median/range) | Assay methods (screening methods/confirmatory methods) | Antibodies measured | Targeted antigen | Test performance (sensitivity, specificity)*               | Reported positive cut-off value                                                                        | Comments |
|--------------------------|---------------|-------------------------------------------------------------|--------------------------------------------------------|---------------------|------------------|------------------------------------------------------------|--------------------------------------------------------------------------------------------------------|----------|
| Lopez et al., 2020       | -             | -                                                           | CLIA                                                   | IgG                 | NP               | -                                                          | Values were considered positive if index was >1.1, negative if <0.8, and borderline if between 0.8-1.1 | -        |
| Ghose et al., 2020       | No            | -                                                           | ELISA                                                  | IgG                 | SP               | Sensitivity:84.7% (95%CI: 80.6%-88.1%)<br>Specificity:100% | cut-off ratio ≥ 1                                                                                      | -        |
| Pasqualotto et al., 2020 | -             | -                                                           | ELISA                                                  | IgG, IgA            | SP               | -                                                          | Values were considered positive if index was >1.1, negative if <0.8, and borderline if between 0.8-1.1 | -        |
| Satpati et al., 2020     | -             | -                                                           | ELISA                                                  | IgG                 | -                | -                                                          | -                                                                                                      | -        |
| Al-Thani et al., 2020    | No            | -                                                           | CLIA                                                   | Total antibodies    | NP               | -                                                          | reactive for optical density cutoff index ≥1.0                                                         | -        |
| Sharma et al., 2020      | No            | -                                                           | ELISA (The ELISA COVID-Kawach IgG)                     | IgG                 | -                | Sensitivity: 92.1%<br>Specificity: 97.7%                   | -                                                                                                      | -        |
|                          |               |                                                             | ELISA (the ERBALISA COVID-19 IgG)                      |                     |                  | Sensitivity: 99.12<br>Specificity: 99.33%                  |                                                                                                        |          |
| Kshatri et al., 2020     | -             | -                                                           | CLIA                                                   | IgG                 | NP               | -                                                          | The value was expressed in Cut off Index (CoI) and a value of ≥1.0 was reactive"                       | -        |
| Cruz-Arenas et al., 2020 | No            | -                                                           | LIFA                                                   | IgG, IgM            | -                | -                                                          | a resulting ratio ≥ 1.1                                                                                | -        |
|                          |               |                                                             | ELISA                                                  | IgG                 | NP               |                                                            |                                                                                                        |          |
| Murhekar et al., 2020    | No            | -                                                           | CLIA                                                   | IgG                 | NP               | -                                                          | Cut off index value of ≥1.4 were interpreted as positive for SARS- CoV-2 antibodies                    | -        |
| Rezwan et al., 2020      | -             | -                                                           | CLIA                                                   | Total antibodies    | NP               | -                                                          | Cut-of-Index (COI) value was >1.0                                                                      | -        |
| Babu et al., 2020        | No            | -                                                           | ELISA                                                  | IgG                 | -                | -                                                          | -                                                                                                      | -        |
| Thielecke et al., 2020   | No            | -                                                           | ELISA                                                  | IgG                 | SP               | -                                                          | Threshold, >1.1                                                                                        | -        |
| Ladage et al., 2020      | No            | -                                                           | ELISA                                                  | IgG, IgA            | SP               | -                                                          | -                                                                                                      | -        |
| -                        | No            | -                                                           | CLIA                                                   | IgG                 | NP               | -                                                          | An index measurement ≥1.4 was considered positive                                                      | -        |

| Reference                                           | Paired serums | Days from last possible exposure to sampling (median/range) | Assay methods (screening methods/confirmatory methods) | Antibodies measured | Targeted antigen | Test performance (sensitivity, specificity)*                           | Reported positive cut-off value                                                                                                                                                               | Comments |
|-----------------------------------------------------|---------------|-------------------------------------------------------------|--------------------------------------------------------|---------------------|------------------|------------------------------------------------------------------------|-----------------------------------------------------------------------------------------------------------------------------------------------------------------------------------------------|----------|
| Kumar et al., 2020                                  |               |                                                             | ELISA                                                  | IgG                 | SP               |                                                                        | Results are evaluated semi-quantitatively by calculation of a ratio of the extinction of the control or patient sample over the extinction of the calibrator, and ratio of < 1.1 was positive |          |
| Official reports                                    |               |                                                             |                                                        |                     |                  |                                                                        |                                                                                                                                                                                               |          |
| MedLife, Romania, 2020                              | No            |                                                             | CLIA                                                   |                     |                  |                                                                        |                                                                                                                                                                                               |          |
|                                                     | No            |                                                             | ELISA                                                  |                     |                  |                                                                        |                                                                                                                                                                                               |          |
| Public Health Ontario, Canada, 2020                 |               |                                                             | CLIA                                                   | IgG                 | NP, SP           | Sensitivity: 90.4%<br>Specificity: 100.0%                              |                                                                                                                                                                                               |          |
| Norwegian Institute of Public Health, 2020          | No            |                                                             | Flow cytometry                                         | IgG                 |                  | Sensitivity:86% (95%CI: 74%-94%)<br>Specificity:100% (95%CI: 99%-100%) |                                                                                                                                                                                               |          |
| Office of National Statistics, UK, 2020             | No            |                                                             | CLIA                                                   | IgG                 |                  |                                                                        |                                                                                                                                                                                               |          |
| the Government of Jersey, UK, 2020                  | Yes           |                                                             | LFIA                                                   | IgG, IgM            |                  |                                                                        |                                                                                                                                                                                               |          |
| Canadian Blood Services, 2020                       |               |                                                             | CLIA                                                   | IgG                 | NP               |                                                                        |                                                                                                                                                                                               |          |
| Ministry of Health, Labour and Welfare, Japan, 2020 |               |                                                             | CLIA                                                   | IgG, IgM            | NP               |                                                                        |                                                                                                                                                                                               |          |
| NHS BT collection, 2020                             | No            |                                                             | ELISA                                                  |                     | SP               |                                                                        |                                                                                                                                                                                               |          |

| Reference                                                                    | Paired serums | Days from last possible exposure to sampling (median/range) | Assay methods (screening methods/confirmatory methods) | Antibodies measured | Targeted antigen | Test performance (sensitivity, specificity)* | Reported positive cut-off value | Comments |
|------------------------------------------------------------------------------|---------------|-------------------------------------------------------------|--------------------------------------------------------|---------------------|------------------|----------------------------------------------|---------------------------------|----------|
| RCGP collection, 2020                                                        | No            | -                                                           | CLIA                                                   | IgG                 | NP               | -                                            | -                               | -        |
| SEU and Paediatric collections, 2020                                         | No            | -                                                           | CLIA                                                   | IgG                 | NP               | -                                            | -                               | -        |
| Health Protection Surveillance Centre, 2020                                  | No            | -                                                           | CLIA                                                   | IgG                 | NP               | -                                            | -                               | -        |
| Islamic Republic of Afghanistan Ministry of Public Health, Afghanistan, 2020 | -             | -                                                           | LFIA                                                   | IgG, IgM            | -                | -                                            | -                               | -        |

Abbreviations: ELISA, Enzyme-linked immunosorbent assay; CLIA: Chemiluminescent immunoassay; LFIA: lateral flow immunoassays; MIA: Microsphere immunoassay; MN, Microneutralisation assay; NT, Neutralization assay; PVNT: Pseudovirus neutralization tests; PRNT: plaque-reduction neutralization test; IFA: Immunofluorescence assay; OD value: Optical density value; POC: point of care; RLU: relative light unit

**Table S4. Summary of studies reporting seroprevalence of human infections with SARS-CoV-2 included in systematic review**

| Reference               | Starting month | Study population                                                                                 | No. of positive/total no. of participants provided sera<br>(seroprevalence rate, %)                                                                                           | Risk factors for SARS-CoV-2 infections (OR, 95%CI) |
|-------------------------|----------------|--------------------------------------------------------------------------------------------------|-------------------------------------------------------------------------------------------------------------------------------------------------------------------------------|----------------------------------------------------|
| Peer-reviewed databases |                |                                                                                                  |                                                                                                                                                                               |                                                    |
| Victoria et al., 2020   | Jan 2020       | Office co-workers<br>waiting room contacts<br>healthcare contacts                                | 0/8 (0)<br>0/14 (0)<br>0/6 (0)                                                                                                                                                | -                                                  |
| To et al., 2020         | Jan 2020       | General population<br>Hong Kong resident evacuated from Hubei                                    | IgG (either anti-NP or anti-RBD): 53/1938 (2.7); Neutralizing antibodies: 0/1938 (0)<br>IgG (either anti-NP or anti-RBD): 13/452 (2.9); Neutralizing antibodies: 15/452 (3.3) | -                                                  |
| Hippich et al., 2020    | Jan 2020       | Children participating in a diabetes screening program<br>Neonates in a Bavarian screening study | 82/11884 (0.7)<br>9/1916 (0.5)                                                                                                                                                | -                                                  |
| Liang et al., 2020      | Jan 2020       | Inpatients and their healthy companions                                                          | Guangzhou: IgG or IgM: 52/8782 (0.6); IgG: 14/8782 (0.2); IgM: 39/8782 (0.4)<br>Wuhan: IgG or IgM: 177/8272 (2.1); IgG: 123/8272 (1.5); IgM: 71/8272 (0.9)                    | -                                                  |
| Ng et al., 2020         | Jan 2020       | Close contact                                                                                    | 44/1150 (3.8)                                                                                                                                                                 | -                                                  |
| Hallowell et al., 2020  | Jan 2020       | Evacuees from Wuhan in a repatriation                                                            | 1/186 (0.5)                                                                                                                                                                   | -                                                  |
| Sam et al., 2020        | Jan 2020       | Residual serum samples collected at a teaching hospital                                          | IgG: 46/588 (7.8)<br>neutralizing antibodies: 3/588 (0.5)                                                                                                                     | -                                                  |

| Reference          | Starting month                                                                                           | Study population        | No. of positive/total no. of participants provided sera<br>(seroprevalence rate, %)                                                                                                                                                                                                                                                                                                                                                                                         | Risk factors for SARS-CoV-2 infections (OR, 95%CI)                                                                              |
|--------------------|----------------------------------------------------------------------------------------------------------|-------------------------|-----------------------------------------------------------------------------------------------------------------------------------------------------------------------------------------------------------------------------------------------------------------------------------------------------------------------------------------------------------------------------------------------------------------------------------------------------------------------------|---------------------------------------------------------------------------------------------------------------------------------|
| Jeong et al., 2020 | Feb 2020                                                                                                 | Emergency professionals | 23/50 (46.0)                                                                                                                                                                                                                                                                                                                                                                                                                                                                | Loss of taste and smell (RR 2.8; 95% CI 1.7 to 4.60); fever (RR 2.0; 95% CI 1.1 to 3.47); dyspnea (RR 1.8; 95% CI 1.1 to 3.19). |
| Buss et al., 2020  | Feb 2020<br>Mar 2020<br>Apr 2020<br>May 2020<br>Jun 2020<br>Jul 2020<br>Aug 2020<br>Sep 2020<br>Oct 2020 | Blood donors            | Manaus:1/821 (0.1)<br>São Paulo:7/799 (0.9)<br>Manaus:6/832 (0.7)<br>São Paulo:22/2454 (0.9)<br>Manaus :46/829 (5.5)<br>São Paulo :27/900 (3.0)<br>Manaus:359/901 (39.9)<br>São Paulo:44/826 (5.3)<br>Manaus:422/911 (46.3)<br>São Paulo:105/880 (11.9)<br>Manaus:419/1147 (36.5))<br>São Paulo:84/879 (9.6)<br>Manaus:242/881 (27.5)<br>São Paulo:113/906 (12.5)<br>Manaus:214/868 (24.7)<br>São Paulo:101/933 (10.8)<br>Manaus:183/882 (20.7)<br>São Paulo:100/877 (11.4) | -                                                                                                                               |

| Reference               | Starting month | Study population                                                                                                | No. of positive/total no. of participants provided sera (seroprevalence rate, %) | Risk factors for SARS-CoV-2 infections (OR, 95%CI)                                                                                                                                                                                                                                                                                                                                                                                                                                                                                                               |
|-------------------------|----------------|-----------------------------------------------------------------------------------------------------------------|----------------------------------------------------------------------------------|------------------------------------------------------------------------------------------------------------------------------------------------------------------------------------------------------------------------------------------------------------------------------------------------------------------------------------------------------------------------------------------------------------------------------------------------------------------------------------------------------------------------------------------------------------------|
| Stadlbauer et al., 2020 | Feb 2020       | Patients with emergency department visit (urgent care group)<br>Patients with OB/GYN visit (routine care group) | 1067/4101 (26.0)<br>731/6590 (11.1)                                              | -                                                                                                                                                                                                                                                                                                                                                                                                                                                                                                                                                                |
| Chen et al., 2020       | Feb 2020       | Healthcare workers                                                                                              | IgG or IgM: 19/105 (18.1)<br>neutralizing antibodies: 18/105 (17.1)              | Univariate analysis:<br>Exposure for more than 30 minutes at less than 1 meter: 3.478 (1.224-9.887), ref: no exposure;<br>Close contact with patient 2: 7.125(1.627-31.210), ref: close contact with patient 1; Doctors: 3.850 (1.131- 13.105), ref: colleague;<br>Multivariate analysis:<br>Close contacts with patient 2: 6.605(1.123-38.830), ref: close contact with patient 1; Doctor: 346.837 (8.924-13479.434), ref: colleague;<br>Wearing disposable non-surgical face mask: 0.127 (0.017-0.968), ref: without wearing disposable non-surgical face mask |
| Liu et al., 2020        | Feb 2020       | Newborn                                                                                                         | 182/3048 (6.0)                                                                   | Infants that were antibody positive for COVID-19 were more likely to be born later during the study period (adjusted OR:1.05; 95% CI, 1.01–1.10, P = 0.01);<br>and to mothers with older maternal age (adjusted OR, 1.13; 95% CI, 1.02–1.25, P = 0.01).                                                                                                                                                                                                                                                                                                          |



| Reference                  | Starting month | Study population                                                                                            | No. of positive/total no. of participants provided sera (seroprevalence rate, %)                                                                                                | Risk factors for SARS-CoV-2 infections (OR, 95%CI)                                                                                     |
|----------------------------|----------------|-------------------------------------------------------------------------------------------------------------|---------------------------------------------------------------------------------------------------------------------------------------------------------------------------------|----------------------------------------------------------------------------------------------------------------------------------------|
| Cavicchiolo et al., 2020   | Feb 2020       | Neonates                                                                                                    | 0/75 (0.0)                                                                                                                                                                      | -                                                                                                                                      |
| Plebani et al., 2020       | Feb 2020       | Healthcare worker                                                                                           | IgG: 343/8285 (4.1)<br>IgM: 82/8285 (1.0)<br>IgG or IgM: 378/8285 (4.6)                                                                                                         | A significant higher seroprevalence could be observed in health care assistants compared to other groups ( $\chi^2=5.34$ , $p=0.021$ ) |
| Cox et al., 2020           | Feb 2020       | Household members of confirmed COVID-19 cases                                                               | 24/77 (31.2)                                                                                                                                                                    | -                                                                                                                                      |
| Villalari'n et al., 2020   | Feb 2020       | Pregnant woman                                                                                              | 86/769 (11.2)                                                                                                                                                                   | -                                                                                                                                      |
| Brandstetter et al., 2020  | Mar 2020       | Hospital staff with close contact<br>Hospital staff with moderate contact<br>Hospital staff with no contact | IgG: 1/50 (2.0); IgA: 3/50 (6.0); IgG or IgA: 4/50 (8.0)<br>IgG: 0/63 (0); IgA: 1/63 (1.6); IgG or IgA: 1/63 (1.6)<br>IgG: 0/50 (0); IgA: 6/50 (12.0) ; IgG or IgA: 6/50 (12.0) | -                                                                                                                                      |
| Solodky et al., 2020       | Mar 2020       | Healthcare worker,<br>cancer patients                                                                       | 13/244 (5.3)<br>5/85 (5.9)                                                                                                                                                      | -                                                                                                                                      |
| Zhang et al., 2020         | Mar 2020       | Healthy individuals returning to Shenzhen                                                                   | IgG: 6/1589 (0.4); IgA: 0/1589 (0); IgM: 0/1589 (0)                                                                                                                             | -                                                                                                                                      |
| Suda et al., 2020          | Mar 2020       | Outpatients with liver disease                                                                              | IgG (Immunochromatographic test): 2/300 (0.67)<br>IgG (CLIA) :1/600 (0.17)                                                                                                      | -                                                                                                                                      |
| Bogogiannidou et al., 2020 | Mar 2020       | Leftover blood samples from nationwide labs                                                                 | 24/6586 (0.36)                                                                                                                                                                  | -                                                                                                                                      |

| Reference              | Starting month | Study population                                                                | No. of positive/total no. of participants provided sera (seroprevalence rate, %) | Risk factors for SARS-CoV-2 infections (OR, 95%CI)                                                                                                                                                                                                                                                                    |
|------------------------|----------------|---------------------------------------------------------------------------------|----------------------------------------------------------------------------------|-----------------------------------------------------------------------------------------------------------------------------------------------------------------------------------------------------------------------------------------------------------------------------------------------------------------------|
| Xu et al., 2020        | Mar 2020       | Hemodialysis Patients;<br>healthcare worker;                                    | 51/1542 (3.3)<br>39/3205 (1.2)                                                   | Independent risk factors for SARS-CoV-2 infection were being older than 65 years, having manifestation of lung infection in imaging examinations, and having a lower level of serum albumin.                                                                                                                          |
| Vena et al., 2020      | Mar 2020       | non-hospitalized participants in an outpatient setting                          | 398/3609 (11.0)                                                                  | Factors Associated with Anti-Sars-CoV-2 Antibodies Positivity:<br>occupational exposure to the virus: 2.36 (1.59–3.50);<br>living in a long-term care facility: 4.53 (3.19–6.45);<br>reporting previous symptoms of influenza-like illness: 4.86 (3.75–6.30);<br>loss of sense of smell or taste: 41.00 (18.94–88.71) |
| Ng et al., 2020        | Mar 2020       | Blood donors;<br>Hospitalized patients admitted for non-respiratory indications | 1/1000 (0.1)<br>1/387 (0.3)                                                      | -                                                                                                                                                                                                                                                                                                                     |
| Venugopal et al., 2020 | Mar 2020       | Healthcare workers                                                              | 130/478 (27.2)                                                                   | Symptomatic participants had a 75% (98/130) rate of seroconversion compared to those without symptoms                                                                                                                                                                                                                 |
| Dingens et al., 2020   | Mar 2020       | Residual serum samples from Seattle Children's Hospital                         | 8/1076 (0.7)                                                                     | -                                                                                                                                                                                                                                                                                                                     |

| Reference                 | Starting month | Study population                                                   | No. of positive/total no. of participants provided sera (seroprevalence rate, %) | Risk factors for SARS-CoV-2 infections (OR, 95%CI) |
|---------------------------|----------------|--------------------------------------------------------------------|----------------------------------------------------------------------------------|----------------------------------------------------|
| Barzin et al., 2020       | Mar 2020       | Patients in outpatient clinics<br>inpatients unrelated to COVID-19 | 24/2937 (0.8)<br>10/1449 (0.7)                                                   |                                                    |
| Pérez-García et al., 2020 | Mar 2020       | Healthcare worker                                                  | IgG or IgM: 542/2424 (22.4)<br>IgG: 527/2424 (21.7)<br>IgM: 55/2424 (2.3)        | Previous contact with COVID-19 patients            |
| Trieu et al., 2020        | Mar 2020       | Healthcare workers                                                 | 11/607(1.8)                                                                      | -                                                  |
| Fischer et al., 2020      | Jan 2020       | Blood donors                                                       | 29/3186 (0.9)                                                                    | -                                                  |
| McCafferty et al., 2020   | Mar 2020       | Patients in an urban hemodialysis unit                             | 93/811 (11.5)                                                                    |                                                    |
| Brown et al., 2020        | Mar 2020       | Student who contacted with infected teacher                        | 1/21 (4.8)                                                                       | -                                                  |
| Han et al., 2020          | Mar 2020       | Persons during work resumption screening                           | IgG: 813/22633 (3.6)<br>IgM: 236/22633 (2.0)<br>IgG or IgM: 196/22633 (0.9)      | -                                                  |
| Zhou et al., 2020         | Mar 2020       | Hospital staff                                                     | IgG or IgM: 89/3674 (2.4)<br>IgG:73/3674 (2.0)<br>IgM: 26/3674 (0.7)             | -                                                  |
| Thompson et al., 2020     | Mar 2020       | Blood donors                                                       | 111/3500 (3.2)                                                                   | -                                                  |

| Reference          | Starting month | Study population       | No. of positive/total no. of participants provided sera<br>(seroprevalence rate, %) | Risk factors for SARS-CoV-2 infections (OR, 95%CI) |
|--------------------|----------------|------------------------|-------------------------------------------------------------------------------------|----------------------------------------------------|
| Carlo et al., 2020 | Mar 2020       | High-risk HCWs         | IgG: 3/428 (0.7)<br>IgM: 4/428 (0.9)                                                | -                                                  |
|                    |                | Intermediate-risk HCWs | IgG: 34/2736 (1.2)<br>IgM: 25/2736 (0.9)                                            |                                                    |
|                    |                | Low-risk HCWs          | IgG: 0/78 (0)<br>IgM: 1/78 (1.3)                                                    |                                                    |

| Reference              | Starting month | Study population                                    | No. of positive/total no. of participants provided sera<br>(seroprevalence rate, %)                               | Risk factors for SARS-CoV-2 infections (OR, 95%CI) |
|------------------------|----------------|-----------------------------------------------------|-------------------------------------------------------------------------------------------------------------------|----------------------------------------------------|
| Tu et al., 2020        | Mar 2020       | Pediatric medical workers (close contact group)     | ELISA:<br>IgG: 66/191 (34.6)<br>IgM: 16/191 (8.4)<br>dual-target immuno-fluorescence assay:<br>IgG: 79/191 (41.4) |                                                    |
|                        |                | Pediatric medical workers (Non-close contact group) | ELISA:<br>IgG: 12/110 (10.9)<br>IgM: 1/110 (0.9)<br>dual-target immuno-fluorescence assay:<br>IgG: 16/109 (14.7)  |                                                    |
|                        |                | Pediatric medical workers (Non-contact group)       | ELISA:<br>IgG: 1/24 (4.2)<br>IgM: 0/24 (0)<br>dual-target immuno-fluorescence assay:<br>IgG: 3/24 (12.5)          |                                                    |
| Kohler et al., 2020    | Mar 2020       | Hospital workers                                    | 8/1012 (0.8)                                                                                                      |                                                    |
| Fuereeder et al., 2020 | Mar 2020       | Healthcare professionals                            | 2/62 (3.2)                                                                                                        |                                                    |
|                        |                | Cancer patients                                     | 2/84 (2.3)                                                                                                        |                                                    |

| Reference              | Starting month | Study population                                      | No. of positive/total no. of participants provided sera (seroprevalence rate, %)                                                                                                                                                                                                            | Risk factors for SARS-CoV-2 infections (OR, 95%CI) |
|------------------------|----------------|-------------------------------------------------------|---------------------------------------------------------------------------------------------------------------------------------------------------------------------------------------------------------------------------------------------------------------------------------------------|----------------------------------------------------|
| Fusco et al., 2020     | Mar 2020       | Healthcare worker                                     | IgG: 2/115 (1.7)<br>IgM: 0/115 (0.0)                                                                                                                                                                                                                                                        | -                                                  |
| Havers et al., 2020    | Mar 2020       | Residual patient sera collected for routine screening | Washington: 43/3264 (1.3)<br>New York City: 144/2482 (5.8)<br>Louisiana: 81/1184 (6.8)<br>South Florida: 38/1742 (2.2)<br>Pennsylvania: 20/824 (2.4)<br>Missouri: 54/1882 (2.9)<br>Utah: 26/1132 (2.3)<br>California: 12/1224 (1.0)<br>Connecticut: 70/1431 (4.9)<br>Minnesota: 14/860(1.6) | -                                                  |
| Xu et al., 2020        | Mar 2020       | Blood donors                                          | IgG: 2/2199 (0.1)<br>IgA: 2/2199 (0.1)<br>Total antibodies: 7/2199 (0.3)                                                                                                                                                                                                                    | -                                                  |
| Behrens et al., 2020   | Mar 2020       | Firstline health care professional                    | IgG: 2/217 (0.9)<br>IgA: 9/217 (4.1)<br>Neutralizing antibodies: 1/217 (0.5)                                                                                                                                                                                                                | -                                                  |
| Loconsole et al., 2020 | Mar 2020       | Patients admitted to Emergency Department             | 70/819 (8.5)                                                                                                                                                                                                                                                                                | -                                                  |

| Reference             | Starting month | Study population                                                                                     | No. of positive/total no. of participants provided sera<br>(seroprevalence rate, %)               | Risk factors for SARS-CoV-2 infections (OR, 95%CI) |
|-----------------------|----------------|------------------------------------------------------------------------------------------------------|---------------------------------------------------------------------------------------------------|----------------------------------------------------|
| Mansour et al., 2020  | Mar 2020       | Healthcare worker                                                                                    | 93/285 (32.6)                                                                                     | -                                                  |
| Gallian et al., 2020  | Mar 2020       | Blood donors                                                                                         | 27/998 (2.7)                                                                                      | -                                                  |
| Korth et al., 2020    | Mar 2020       | High-risk Healthcare worker,<br>Intermediated-risk healthcare worker,<br>Low-risk healthcare worker, | 3/244 (1.2)<br>2/37 (5.4)<br>0/35 (0.0)                                                           | -                                                  |
| Bielecki et al., 2020 | Mar 2020       | Soldiers stationed at a Swiss Army Base<br>Company 1<br>Company 2                                    | 7/88 (8.0)<br>111/181 (61.3)                                                                      | -                                                  |
| Tsaneva et al., 2020  | Mar 2020       | Outpatients                                                                                          | IgG: 22/586 (3.8);<br>IgM: 13/586 (2.2);<br>IgG or IgM: 28/586 (4.8)                              | -                                                  |
| Houlihan et al., 2020 | Mar 2020       | First-line healthcare worker                                                                         | 46/181 (25.4)                                                                                     | -                                                  |
| Liu et al., 2020      | Mar 2020       | Community residents and employees                                                                    | 1360/35040 (3.9)                                                                                  | -                                                  |
| Basteiro et al., 2020 | Mar 2020       | Health care workers                                                                                  | IgG or IgM or IgA: 54/578 (9.3);<br>IgG: 44/578 (7.6);<br>IgM: 36/578 (6.2);<br>IgA: 47/578 (8.1) | -                                                  |

| Reference              | Starting month | Study population                                                                                                                                                                                                                                                                                                                                                     | No. of positive/total no. of participants provided sera<br>(seroprevalence rate, %)                                                                                                                                                                                                                                                                                                                                                                                                                                                                                                                                                                                                                                 | Risk factors for SARS-CoV-2 infections (OR, 95%CI) |
|------------------------|----------------|----------------------------------------------------------------------------------------------------------------------------------------------------------------------------------------------------------------------------------------------------------------------------------------------------------------------------------------------------------------------|---------------------------------------------------------------------------------------------------------------------------------------------------------------------------------------------------------------------------------------------------------------------------------------------------------------------------------------------------------------------------------------------------------------------------------------------------------------------------------------------------------------------------------------------------------------------------------------------------------------------------------------------------------------------------------------------------------------------|----------------------------------------------------|
| Isherwood et al., 2020 | Mar 2020       | Patients in a tertiary acute general surgical unit<br>Healthcare staff in the same healthcare setting                                                                                                                                                                                                                                                                | 71/1964 (3.6)<br>15/215 (7.0)                                                                                                                                                                                                                                                                                                                                                                                                                                                                                                                                                                                                                                                                                       | -                                                  |
| Xu et al., 2020        | Mar 2020       | Healthcare worker in Wuhan<br>Healthcare worker in Hubei<br>Healthcare worker in Chongqing<br>Healthcare worker in Guangdong<br>Healthcare worker relative in Wuhan<br>Hemodialysis patient in Hubei<br>Hemodialysis patient in Guangdong<br>Outpatient in Chongqing<br>Hotel staff member in Wuhan<br>Community resident in Sichuan<br>Factory workers in Guangdong | IgG:27/714 (3.8); IgM:6/714 (0.8); IgG or IgM: 27/714 (3.8)<br>IgG:37/3091 (1.2); IgM:4/3091 (0.1); IgG or IgM: 41/3091 (1.3)<br>IgG:8/319 (2.5); IgM:2/319 (0.6); IgG or IgM: 10/319 (3.1)<br>IgG:1/260 (0.4); IgM:2/260 (0.8); IgG or IgM: 3/260 (1.2)<br>IgG:7/219 (3.2); IgM:3/219 (1.4); IgG or IgM: 7/219 (3.2)<br>IgG:19/979 (1.9); IgM:19/979 (1.9); IgG or IgM: 35/979 (3.6)<br>IgG:12/563 (2.1); IgM:7/563 (1.2); IgG or IgM: 16/563 (2.8)<br>IgG:37/993 (3.7); IgM:1/993 (0.1); IgG or IgM: 38/993 (3.8)<br>IgG:11/346 (3.2); IgM:8/346 (2.3); IgG or IgM: 13/346 (3.8)<br>IgG:26/9442 (0.3); IgM:29/9442 (0.3); IgG or IgM: 55/9442 (0.6)<br>IgG:4/442 (0.9); IgM: 4/442 (0.9); IgG or IgM:6 /442 (1.4) | -                                                  |
| Milani et al., 2020    | Mar 2020       | Personnel of the University of Milan                                                                                                                                                                                                                                                                                                                                 | Total antibodies:5/197 (2.5)<br>IgM:5/197 (2.5)<br>IgG:11/197 (5.6)                                                                                                                                                                                                                                                                                                                                                                                                                                                                                                                                                                                                                                                 | -                                                  |
| Medas et al., 2020     | Mar 2020       | Patients admitted at surgical department                                                                                                                                                                                                                                                                                                                             | IgG or IgM: 5/86 (5.8)<br>IgM: 4/86 (4.7)<br>IgG: 3/86 (3.5)                                                                                                                                                                                                                                                                                                                                                                                                                                                                                                                                                                                                                                                        | -                                                  |



| Reference                       | Starting month | Study population                                                                 | No. of positive/total no. of participants provided sera (seroprevalence rate, %) | Risk factors for SARS-CoV-2 infections (OR, 95%CI) |
|---------------------------------|----------------|----------------------------------------------------------------------------------|----------------------------------------------------------------------------------|----------------------------------------------------|
| Vos et al., 2020                | Mar 2020       | General population                                                               | 74/3147 (2.4)                                                                    | -                                                  |
| Savirón-Cornudella et al., 2020 | Mar 2020       | Pregnant women                                                                   | 18/260 (6.9)                                                                     | -                                                  |
| Bryan et al., 2020              | Apr 2020       | Community resident                                                               | 87/4856 (1.8)                                                                    | -                                                  |
| Hains et al., 2020              | Apr 2020       | Hemodialysis patients<br>Healthcare worker                                       | IgG:3/13 (23.1); IgM:2/13 (15.4)<br>IgG:7/25 (28.0); IgM:4/25 (16.0)             | -                                                  |
| Liu et al., 2020                | Apr 2020       | Healthcare worker deployed to Wuhan<br>Healthcare professionals at home hospital | IgG:0/420 (0.0); IgM: 0/420 (0.0)<br>IgG:0/77 (0.0); IgM: 0/77 (0.0)             | -                                                  |
| Malickova et al., 2020          | Apr 2020       | Inflammatory bowel disease healthcare professionals                              | 2/92 (2.2)                                                                       | -                                                  |
| Paulino-Ramirez et al., 2020    | Apr 2020       | Community residents in emerging hotspots                                         | IgG: 704/12897 (5.5)<br>IgM: 491/12897 (3.8)                                     | -                                                  |
| Chirathaworn et al., 2020       | Apr 2020       | Individuals who came into close contacts with the patients                       | 15/308 (4.9)                                                                     | -                                                  |
| Posfay-Barbe et al., 2020       | Apr 2020       | Children seeking medical care                                                    | 18/208 (8.7)                                                                     | -                                                  |
| Slot et al., 2020               | Apr 2020       | Regular blood plasma donors                                                      | 230/7361 (3.1)                                                                   | -                                                  |
| Olayanju et al., 2020           | Apr 2020       | Frontline healthcare workers                                                     | 60/133 (45.1)                                                                    | -                                                  |

| Reference                 | Starting month | Study population                                                    | No. of positive/total no. of participants provided sera (seroprevalence rate, %) | Risk factors for SARS-CoV-2 infections (OR, 95%CI)                                                                                                                                                                                       |
|---------------------------|----------------|---------------------------------------------------------------------|----------------------------------------------------------------------------------|------------------------------------------------------------------------------------------------------------------------------------------------------------------------------------------------------------------------------------------|
| Berte et al., 2020        | Apr 2020       | Inflammatory bowel diseases patients                                | IgG:8/354 (2.3)<br>IgA:12/354 (3.4)                                              | Multivariate analysis:<br>The presence of a COVID-19 infected relative (RR 52.4, 95%CI 1.5-1769.2; p=0.027);<br>Univariate analysis:<br>History of fever and anosmia/ageusia in the last two months (RR 54.5, 95%CI 2.1-1434.9; p=0.016) |
| Ciechanowicz et al., 2020 | Apr 2020       | Patients with psoriasis treated with biologic therapy               | IgG:7/61 (11.5)<br>IgG or IgM or IgA: 7/61(11.5)                                 | -                                                                                                                                                                                                                                        |
| Ko et al., 2020           | Apr 2020       | COVID-19- designated HCWs<br>Non-COVID-19-designated HCWs           | 1/309 (0.3)<br>0/123 (0)                                                         | -                                                                                                                                                                                                                                        |
| Lackermair et al., 2020   | Mar 2020       | Healthcare worker                                                   | 4/151 (2.6)                                                                      | -                                                                                                                                                                                                                                        |
| Sotgiu et al., 2020       | Mar 2020       | Healthcare worker                                                   | IgM: 29/202 (14.4)<br>IgG: 29/202 (7.4)                                          | -                                                                                                                                                                                                                                        |
| Mohanty et al., 2020      | Apr 2020       | Asymptomatic patients, caregivers, and healthcare workers           | 129/1670 (7.7)                                                                   | -                                                                                                                                                                                                                                        |
| Wu et al., 2020           | Apr 2020       | People applying for a permission of resume<br>Hospitalized patients | IgG:98/1021 (9.6); IgM: 0/1021 (0.0)<br>IgG:40/381(10.5); IgM: 1/381 (0.0)       | -                                                                                                                                                                                                                                        |
| Stubblefield et al., 2020 | Apr 2020       | Healthcare worker worked in COVID-19 units                          | 19/249 (7.6)                                                                     | -                                                                                                                                                                                                                                        |

| Reference               | Starting month | Study population                                                                        | No. of positive/total no. of participants provided sera (seroprevalence rate, %)                                                             | Risk factors for SARS-CoV-2 infections (OR, 95%CI)                                                                                                                                       |
|-------------------------|----------------|-----------------------------------------------------------------------------------------|----------------------------------------------------------------------------------------------------------------------------------------------|------------------------------------------------------------------------------------------------------------------------------------------------------------------------------------------|
| Self et al., 2020       | Apr 2020       | frontline Health care personnel                                                         | 194/3248 (6.0)                                                                                                                               | Detection of SARS-CoV-2 antibodies was less common among participants who reported using a face covering for all clinical encounters (6%) than among those who did not (9%) (p = 0.012). |
| Stellato et al., 2020   | Apr 2020       | Patients, caregivers and health care workers                                            | 5/662 (0.8)                                                                                                                                  | -                                                                                                                                                                                        |
| Flannery et al., 2020   | Apr 2020       | Pregnant women presenting for delivery                                                  | IgG or IgM: 80/1293 (6.2)<br>IgG: 76/1293 (5.9)<br>IgM: 59/1293 (4.6)                                                                        | Black/non-Hispanic and Hispanic/Latino women have higher SARS-CoV-2 seroprevalence rates relative to women of other races                                                                |
| Stock et al., 2020      | Apr 2020       | Adult clinicians                                                                        | 15/98 (15)                                                                                                                                   | -                                                                                                                                                                                        |
| Goldberg et al., 2020   | Apr 2020       | Staff members at a Skilled Nursing Facility;<br>residents at a Skilled Nursing Facility | 4/84 (4.8)<br>11/56 (19.6)                                                                                                                   | -                                                                                                                                                                                        |
| Stringhini et al., 2020 | Apr 2020       | General population                                                                      | Week1: 12/341 (3.5)<br>Week2: 28/469 (6.0)<br>Week3: 61/577 (10.6)<br>Week4: 36/604 (6.0)<br>Week5: 82/775 (10.6)<br>Overall: 219/2766 (7.9) | Univariate analysis:<br>Aged 5–9 years:0.32 (0.11-0.63);<br>65 years and older:0.50 (0.28-0.78);<br>ref: aged 20–49 years                                                                |
| Erikstrup et al., 2020  | Apr 2020       | Blood donors                                                                            | 412/20640 (2.0)                                                                                                                              | -                                                                                                                                                                                        |

| Reference                 | Starting month | Study population                                                                      | No. of positive/total no. of participants provided sera (seroprevalence rate, %) | Risk factors for SARS-CoV-2 infections (OR, 95%CI) |
|---------------------------|----------------|---------------------------------------------------------------------------------------|----------------------------------------------------------------------------------|----------------------------------------------------|
| Lahner et al., 2020       | Apr 2020       | Healthcare worker                                                                     | IgG: 8/1084 (0.7)<br>IgM: 0/1084 (0.0)                                           | -                                                  |
| Labriola et al., 2020     | Apr 2020       | Patients on in-center maintenance hemodialysis                                        | 8/98 (8.2)                                                                       | -                                                  |
| Pallett et al., 2020      | Apr 2020       | Health-care workers                                                                   | IgG: 624/1704 (36.6)<br>IgM: 45/1704 (2.6)                                       | -                                                  |
| Sood et al., 2020         | Apr 2020       | General population                                                                    | 35/863 (4.1)                                                                     | -                                                  |
| Shakiba et al., 2020      | Apr 2020       | Residents                                                                             | IgG: 113/528 (21.7)<br>IgM: 102/528 (19.3)<br>IgG or IgM: 117/528 (22.2)         | -                                                  |
| Madsen et al., 2020       | Apr 2020       | ED employees                                                                          | 16/270 (6.0)                                                                     | -                                                  |
| Sims et al., 2020         | Apr 2020       | Healthcare worker                                                                     | 1818/20614 (8.8)                                                                 | -                                                  |
| Crovetto et al., 2020     | Apr 2020       | Pregnant women attending first trimester screening                                    | 125/874 (14.3)                                                                   | -                                                  |
| Gudbjartsson et al., 2020 | Apr 2020       | persons contact with the Icelandic health care system for reasons other than Covid-19 | 39/18609 (0.2)                                                                   | -                                                  |
|                           |                | Icelanders in the greater Reykjavik area                                              | 21/4843 (0.4)                                                                    | -                                                  |
|                           |                | Residents of Vestmannaeyjar                                                           | 3/663 (0.5)                                                                      | -                                                  |
|                           |                | Icelanders had been quarantined                                                       | 97/4222 (2.3)                                                                    | -                                                  |

| Reference                    | Starting month | Study population                                                  | No. of positive/total no. of participants provided sera (seroprevalence rate, %)                                                        | Risk factors for SARS-CoV-2 infections (OR, 95%CI)                                                                                                          |
|------------------------------|----------------|-------------------------------------------------------------------|-----------------------------------------------------------------------------------------------------------------------------------------|-------------------------------------------------------------------------------------------------------------------------------------------------------------|
| Naranbhai et al., 2020       | Apr 2020       | Asymptomatic residents                                            | IgG or IgM: 63/200 (31.5)<br>IgG: 45/200 (22.5)<br>IgM: 53/200 (26.5)                                                                   | The number of cohabiting children: 1.057 (1.001-1.117); reduced sense of smell or taste: 1.519 (1.208-1.910)                                                |
| Herzberg et al., 2020        | Apr 2020       | Hospital employees and nuns                                       | 23/871 (2.6)                                                                                                                            | -                                                                                                                                                           |
| Dacosta-Urbieta et al., 2020 | Apr 2020       | Healthcare workers                                                | IgG or IgM: 7/175 (4.0)<br>IgG: 3/175 (1.7)<br>IgM: 4/175 (2.3)                                                                         | -                                                                                                                                                           |
| Lumley et al., 2020          | Apr 2020       | Antenatal women                                                   | IgG: 53/1000 (5.3)<br>Neutralizing antibodies: 43/1000 (4.3)                                                                            | -                                                                                                                                                           |
| Rudberg et al., 2020         | Apr 2020       | Healthcare worker                                                 | 410/2149 (19.1)                                                                                                                         | Seroprevalence was strongly associated with patient-related work (OR: 2.9), covid-19 patient contact (OR: 1.43), and occupation assisting nurse (OR: 3.67). |
| Buntinx et al., 2020         | Apr 2020       | Residents in a nursing home<br><br>staff member in a nursing home | IgG:15/100 (1.5)<br>IgM: 13/100 (1.3)<br>IgG or IgM: 17/100 (1.7)<br>IgG: 14/88 (15.9)<br>IgM: 11/88 (12.5)<br>IgG or IgM: 18/88 (20.5) | -                                                                                                                                                           |

| Reference             | Starting month | Study population    | No. of positive/total no. of participants provided sera (seroprevalence rate, %) | Risk factors for SARS-CoV-2 infections (OR, 95%CI)                                                                                                                                                                                                                                                                                             |
|-----------------------|----------------|---------------------|----------------------------------------------------------------------------------|------------------------------------------------------------------------------------------------------------------------------------------------------------------------------------------------------------------------------------------------------------------------------------------------------------------------------------------------|
| Martin et al., 2020   | Apr 2020       | General population  | 36/326 (11.0)                                                                    | -                                                                                                                                                                                                                                                                                                                                              |
| Amendola et al., 2020 | Apr 2020       | Healthcare worker   | 34/663(5.1)                                                                      | -                                                                                                                                                                                                                                                                                                                                              |
| Iversen et al., 2020  | Apr 2020       | Healthcare worker   | IgG: 808/28792 (2.8)<br>IgM: 768/28792 (2.7)<br>IgG or IgM: 1163/28792 (4.0)     | Male health-care workers: RR=1.49 [1.31–1.68];<br>p<0.001; ref: female health-care workers;<br>Frontline health-care workers: RR 1.38 [1.22–1.56]; p<0.001; ref: health-care workers in other settings;<br>Health-care workers working on dedicated COVID-19 wards: RR 1.65 [1.34–2.03]; p<0.001);<br>ref: other frontline health-care workers |
|                       |                | Blood donors        | IgG-only: 86/4672 (1.8)<br>IgM-only: 92/4672 (2.0)<br>IgG or IgM: 142/4672 (3.0) | -                                                                                                                                                                                                                                                                                                                                              |
| Olalla et al., 2020   | Apr 2020       | Health care workers | 9/498 (1.8)                                                                      | -                                                                                                                                                                                                                                                                                                                                              |
| Cosma et al., 2020    | Apr 2020       | Pregnant women      | IgG: 8/138 (5.9)<br>IgM: 4/138 (2.9)<br>IgG and IgM: 2/138 (1.4)                 | -                                                                                                                                                                                                                                                                                                                                              |

| Reference                    | Starting month | Study population                                | No. of positive/total no. of participants provided sera (seroprevalence rate, %)                                                                       | Risk factors for SARS-CoV-2 infections (OR, 95%CI)                                                          |
|------------------------------|----------------|-------------------------------------------------|--------------------------------------------------------------------------------------------------------------------------------------------------------|-------------------------------------------------------------------------------------------------------------|
| Caban-Martinez et al., 2020  | Apr 2020       | Frontline firefighter/paramedic workforce"      | IgG or IgM: 18/203 (8.9)<br>IgM: 10/203 (4.9)<br>IgG: 10/203 (4.9)                                                                                     | -                                                                                                           |
| Poletti et al., 2020         | Apr 2020       | Close contacts of COVID-19 cases                | 2187/4120 (53.1)                                                                                                                                       | -                                                                                                           |
| Waterfield et al., 2020      | Apr 2020       | Healthy children of healthcare workers          | 68/992 (6.9)                                                                                                                                           | -                                                                                                           |
| Racine-Brzostek et al., 2020 | Apr 2020       | Health care workers                             | IgG or IgM: 805/2274 (35.4)<br>IgG: 798/2274 (35.1)<br>IgM: 232/2274 (10.2)                                                                            | Ancillary: 2.12; administrative staff: 2.20; ref: physicians, nurse practitioners, and physician assistants |
| Calcagno et al., 2020        | Apr 2020       | Health care workers                             | 377/5444 (6.9)                                                                                                                                         | -                                                                                                           |
| Poustchi et al., 2020        | Apr 2020       | General population<br><br>High-risk populations | IgG:412/3530 (11.7)<br>IgM: 204/3530 (5.8)<br>IgG or IgM: 494/3530 (14.0)<br>IgG: 691/5372 (12.9)<br>IgM:337/5372 (6.3)<br>IgG or IgM: 919/5372 (17.1) | -                                                                                                           |
| Cito et al., 2020            | Apr 2020       | Villagers                                       | 73/667 (10.9)                                                                                                                                          | -                                                                                                           |
| Rosenberg et al., 2020       | Apr 2020       | General population                              | 1887/15101 (12.5)                                                                                                                                      | -                                                                                                           |

| Reference              | Starting month | Study population                                | No. of positive/total no. of participants provided sera (seroprevalence rate, %) | Risk factors for SARS-CoV-2 infections (OR, 95%CI)                                                                                                                                                             |
|------------------------|----------------|-------------------------------------------------|----------------------------------------------------------------------------------|----------------------------------------------------------------------------------------------------------------------------------------------------------------------------------------------------------------|
| Daniel et al., 2020    | Apr 2020       | Service member                                  | Total antibodies: 228/382 (60.0);<br>neutralizing antibodies: 135/382 (35.3)     | Univariate analysis:<br>Hispanic/Latino participants were more likely to have positive microneutralization test results than were participants of non-Hispanic/Latino or unspecified ethnicity: 2.4 (1.1-5.1). |
| Schmidt et al., 2020   | Apr 2020       | Clinic staff                                    | 11/385 (2.9)                                                                     | -                                                                                                                                                                                                              |
| Moscola et al., 2020   | Mar 2020       | Health Care Personnel in the New York City Area | 5523/40329 (13.7)                                                                | Previous positive PCR test result (RR, 1.52 [95% CI, 1.44-1.60])<br>High suspicion of virus exposure (RR, 1.23 [95% CI, 1.18-1.28])                                                                            |
| Tarabichi et al., 2020 | May 2020       | Public first responders                         | IgG: 9/296 (3.0)<br>IgM: 8/296 (2.7)                                             | -                                                                                                                                                                                                              |
| Rosser et al., 2020    | Apr 2020       | Healthcare personnel                            | 136/10449 (1.3)                                                                  | Hispanic ethnicity: OR 2.68; ref: non-Hispanic ethnicity                                                                                                                                                       |
| Armin et al., 2020     | Apr 2020       | Staff of a Children's Hospital                  | IgG: 89/475 (18.7)<br>IgM: 75/475 (15.8)<br>IgG or IgM: 140/475 (29.5)           | BMI $\geq$ 24 (OR:1.72, 95% CI: 1.17 to 2.57); ref: BMI below 24;<br>family of four members (OR:1.49, 95% CI: 1.01 to 2.20), ref: families with three or fewer members                                         |



| Reference               | Starting month | Study population                                                                                                                                  | No. of positive/total no. of participants provided sera (seroprevalence rate, %)                 | Risk factors for SARS-CoV-2 infections (OR, 95%CI)                                                       |
|-------------------------|----------------|---------------------------------------------------------------------------------------------------------------------------------------------------|--------------------------------------------------------------------------------------------------|----------------------------------------------------------------------------------------------------------|
| Montenegro et al., 2020 | Apr 2020       | Community individuals<br><br>Patients consulting the primary care physician                                                                       | IgG: 11/311 (3.5)<br>IgM: 12/311 (3.9)<br>IgG or IgM: 17/311 (5.5)<br>IgG or IgM: 244/634 (38.5) | -                                                                                                        |
| Kaufman et al., 2020    | Apr 2020       | -                                                                                                                                                 | 316957/2402282 (13.2)                                                                            | -                                                                                                        |
| Ahmad et al., 2020      | Apr 2020       | High-risk populations                                                                                                                             | 51/244 (20.9)                                                                                    | -                                                                                                        |
| Steensels et al., 2020  | Apr 2020       | Hospital staff                                                                                                                                    | 197/3056 (6.4)                                                                                   | Univariate analysis:<br>Having a household contact: 3.15 (2.33-4.25); ref: without any household contact |
| Mostafa et al., 2020    | Apr 2020       | Health care workers                                                                                                                               | IgG: 15/4040 (0.4)<br>IgM: 39/4040 (1.0)                                                         | -                                                                                                        |
| Kantele et al., 2020    | Apr 2020       | Healthcare workers                                                                                                                                | 29/1095 (2.6)                                                                                    | Aged 55 years or older (OR 2.4, 95% CI 1.1 -5.2), ref: the younger                                       |
| Soriano et al., 2020    | Apr 2020       | University employees;<br>University employees' relatives<br>Social services and health care workers<br>Individuals living in communities<br>Other | 17/175 (9.7)<br>7/85 (8.2)<br>14/108 (13.0)<br>45/234 (19.2)<br>10/72 (13.9)                     | -                                                                                                        |

| Reference                | Starting month | Study population                                                            | No. of positive/total no. of participants provided sera (seroprevalence rate, %)                   | Risk factors for SARS-CoV-2 infections (OR, 95%CI)                                                                                                                                                                                                                                                               |
|--------------------------|----------------|-----------------------------------------------------------------------------|----------------------------------------------------------------------------------------------------|------------------------------------------------------------------------------------------------------------------------------------------------------------------------------------------------------------------------------------------------------------------------------------------------------------------|
| Eyre et al., 2020        | Apr 2020       | Healthcare worker                                                           | IgG (CLIA): 951/9958 (9.6)<br>IgG (ELISA): 905/9958 (9.1)<br>IgG (CLIA or ELISA): 1069/9958 (10.7) | Working in Covid-19 facing areas (2.47, 1.99-3.08, p<0.001) or throughout the hospital (1.39, 1.04-1.85, p=0.02) was associated with increased risk compared to non-Covid-19 areas                                                                                                                               |
| Halatoko et al., 2020    | Apr 2020       | High-risk populations                                                       | IgG: 8/955 (0.8)<br>IgM: 2/955 (0.2)<br>IgG or IgM: 9/955 (0.9)                                    | -                                                                                                                                                                                                                                                                                                                |
| Shields et al., 2020     | Apr 2020       | Healthcare workers                                                          | 126/516 (24.4)                                                                                     | Black, Asian and minority ethnic ethnicity: 1.92 (1.14-3.23).                                                                                                                                                                                                                                                    |
| Makaronidis et al., 2020 | Apr 2020       | People with an acute loss in their sense of smell and/or taste in community | IgG: 425/567 (75.0)<br>IgM: 136/567 (24.0)<br>IgG or IgM: 439/567 (77.4)                           | -                                                                                                                                                                                                                                                                                                                |
| Guerrero et al., 2020    | Apr 2020       | Verona population                                                           | 41/1515 (2.7)                                                                                      | -                                                                                                                                                                                                                                                                                                                |
| Menachemi et al., 2020   | Apr 2020       | Indiana residents derived from tax returns                                  | 38/3518(1.1)<br>52/889 (5.8)                                                                       | The overall prevalence was significantly higher among Hispanics (8.3%) than among non-Hispanics (2.3%) (p = 0.03). Participants who reported having a current household member who had previously been told by a provider that they had COVID-19 had a higher overall prevalence (33.6% versus 2.2%; p = 0.004). |

| Reference                   | Starting month | Study population                                    | No. of positive/total no. of participants provided sera<br>(seroprevalence rate, %) | Risk factors for SARS-CoV-2 infections (OR, 95%CI) |
|-----------------------------|----------------|-----------------------------------------------------|-------------------------------------------------------------------------------------|----------------------------------------------------|
| Vilibic-Cavlek et al., 2020 | Apr 2020       | Personnel in the healthcare facilities              | 9/592 (1.5)                                                                         | -                                                  |
| Pollán et al., 2020         | Apr 2020       | General population                                  | LFIA: 3054/51075 (5.0)<br>CLIA: 2390/51958 (4.6)                                    | -                                                  |
| Petersen et al., 2020       | Apr 2020       | Inhabitants of the Faroe Islands                    | 6/1075(0.6)                                                                         | -                                                  |
| Bajema et al., 2020         | Apr 2020       | Commercial Laboratory Residual Sera                 | 56/1343 (4.2)                                                                       | -                                                  |
| Biggs et al., 2020          | Apr 2020       | Community household residents                       | 19/696 (2.7)                                                                        | -                                                  |
| Sydney et al., 2020         | Apr 2020       | Healthcare workers                                  | 327/1700 (19.2)                                                                     | -                                                  |
| Brotons et al., 2020        | Apr 2020       | Children household member<br>Adult household member | 118/672 (17.6)<br>77/412 (18.7)                                                     | -                                                  |
| Hunter et al., 2020         | Apr 2020       | Healthcare worker                                   | 12/734 (1.6)                                                                        | -                                                  |
| Tilley et al., 2020         | Apr 2020       | University student population.                      | 32/790 (4.1)                                                                        | -                                                  |
| Tsatsaris et al., 2020      | Apr 2020       | Pregnant women                                      | 25/529 (4.7)                                                                        | -                                                  |
| Uyoga et al., 2020          | Apr 2020       | Blood donors                                        | 174/3098 (5.6)                                                                      | -                                                  |

| Reference               | Starting month | Study population                                       | No. of positive/total no. of participants provided sera (seroprevalence rate, %) | Risk factors for SARS-CoV-2 infections (OR, 95%CI) |
|-------------------------|----------------|--------------------------------------------------------|----------------------------------------------------------------------------------|----------------------------------------------------|
| Josè et al., 2020       | May 2020       | Healthy blood donors                                   | IgG or IgM: 9/904 (1.0);<br>IgG: 9/904 (1.0)<br>IgM: 1/904 (1.0)                 | -                                                  |
| Paderno et al., 2020    | May 2020       | Healthcare worker in otolaryngology unit               | 4/58 (6.9)                                                                       | -                                                  |
| Merkely et al., 2020    | May 2020       | Hungarian population                                   | 69/10474 (0.7)                                                                   | -                                                  |
| Addetia et al., 2020    | May 2020       | Ship's crew                                            | IgG: 6/120 (5.0)<br>Neutralizing antibodies: 3/120 (2.5)                         | -                                                  |
| Ladhani et al., 2020    | May 2020       | Children of healthcare workers with confirmed COVID-19 | 20/44 (45.5)                                                                     | -                                                  |
| Nailescu et al., 2020   | May 2020       | Pediatric kidney transplant recipients                 | 1/31 (3.2)                                                                       | -                                                  |
| Sperotto et al., 2020   | May 2020       | Allogeneic stem cell transplantation recipients        | IgG: 0/70 (0)<br>IgM: 0/70 (0)<br>IgG or IgM: 0/70 (0)                           | -                                                  |
| Mack et al., 2020       | May 2020       | Professional football players and staff                | 23/1157 (2.0)                                                                    | -                                                  |
| Belingheri et al., 2020 | May 2020       | Healthcare worker                                      | 303/3520 (8.6)                                                                   | -                                                  |

| Reference               | Starting month | Study population                                                            | No. of positive/total no. of participants provided sera (seroprevalence rate, %) | Risk factors for SARS-CoV-2 infections (OR, 95%CI)                              |
|-------------------------|----------------|-----------------------------------------------------------------------------|----------------------------------------------------------------------------------|---------------------------------------------------------------------------------|
| Lastrucci et al., 2020  | May 2020       | 'Health service' group<br>'Support service' group<br>'Work-from-home' group | 16/2828 (4.1)<br>15/1103 (1.4)<br>7/725 (1.0)                                    | 'Health service' group: OR 4.38 (95%CI 2.19-10.41); ref: 'Work-from-home' group |
| Dioscoridi et al., 2020 | May 2020       | Family members<br>health care workers                                       | 26/81 (32.1)<br>2/38 (5.3)                                                       | -                                                                               |
| Péré et al., 2020       | May 2020       | Health care workers                                                         | 437/3569 (12.2)                                                                  | -                                                                               |
| Borges et al., 2020     | May 2020       | Asymptomatic residents                                                      | IgG: 218/2635 (8.3)<br>IgM: 347/2921 (11.9)                                      | -                                                                               |
| Torres et al., 2020     | May 2020       | Students<br>staff members                                                   | 100/1009 (9.9)<br>36/235 (15.3)                                                  | -                                                                               |
| Poulikakos et al., 2020 | May 2020       | Healthcare workers                                                          | 17/281 (6.0)                                                                     | -                                                                               |
| Veerus et al., 2020     | May 2020       | Pregnant women                                                              | 2/433 (0.5)                                                                      | -                                                                               |
| Brunner et al., 2020    | May 2020       | Employees of Bassett Healthcare Network<br>Patients                         | 15/764 (2.0)<br>34/762 (4.5)                                                     | -                                                                               |
| Vijh et al., 2020       | May 2020       | Residents in both facilities<br>Staff in both facilities                    | 68/122 (55.7)<br>45/169 (26.6)                                                   | -                                                                               |

| Reference                | Starting month | Study population                                                          | No. of positive/total no. of participants provided sera (seroprevalence rate, %) | Risk factors for SARS-CoV-2 infections (OR, 95%CI) |
|--------------------------|----------------|---------------------------------------------------------------------------|----------------------------------------------------------------------------------|----------------------------------------------------|
| Rashid-Abdi et al., 2020 | May 2020       | Health-care workers at a department of infectious diseases                | 18/120 (15.0)                                                                    | -                                                  |
| Stefanelli et al., 2020  | May 2020       | Resident                                                                  | 1402/6098 (22.9)                                                                 | -                                                  |
| Feehan et al., 2020      | May 2020       | General population                                                        | 183/2640 (6.9)                                                                   | -                                                  |
| Sutton et al., 2020      | May 2020       | Patients visiting ambulatory, emergency, or inpatient health care setting | 9/897 (1.0)                                                                      | -                                                  |
| Bampoe et al., 2020      | May 2020       | Maternity healthcare workers                                              | 29/200 (14.5)                                                                    | Presence of anosmia:18 (6-55)                      |
| Cento et al., 2020       | May 2020       | Consecutive patients                                                      | 140/2753 (5.1)                                                                   |                                                    |
| Rivas et al., 2020       | May 2020       | Healthcare workers                                                        | 297/6201 (4.8)                                                                   |                                                    |
| Capasso et al., 2020     | May 2020       | Multiple sclerosis patients                                               | IgG: 9/310 (2.9)<br>IgM: 0/310 (0)<br>IgG or IgM:9/310 (2.9)                     |                                                    |
|                          |                | University staff from non-clinical departments                            | IgG: 5/862 (0.6)<br>IgM: 6/862 (0.7)<br>IgG or IgM: 11/862 (1.3)                 |                                                    |
|                          |                | Healthcare staff from COVID-19 wards                                      | IgG: 17/235 (7.2)<br>IgM: 16/235 (6.8)<br>IgG or IgM: 25/235 (10.6)              |                                                    |

| Reference             | Starting month | Study population                                 | No. of positive/total no. of participants provided sera (seroprevalence rate, %) | Risk factors for SARS-CoV-2 infections (OR, 95%CI)                                   |
|-----------------------|----------------|--------------------------------------------------|----------------------------------------------------------------------------------|--------------------------------------------------------------------------------------|
| Murhekar et al., 2020 | May 2020       | General population                               | 157/28000 (0.56)                                                                 |                                                                                      |
| Tong et al., 2020     | May 2020       | Medical staff who went to Wuhan city for support | 0/191 (0.0)                                                                      | -                                                                                    |
| Iwuji et al., 2020    | May 2020       | First responders                                 | 5/683 (0.7)                                                                      |                                                                                      |
| Mughal et al., 2020   | May 2020       | Healthcare personnel (HCP) in the ICU setting.   | 1/121 (0.8)                                                                      | -                                                                                    |
| Hallal et al., 2020   | May 2020       | Community residents                              | Round1: 347/24955 (1.4)<br>Round2: 753/31162 (2.4)                               | Unadjusted OR:<br>Indigenous individuals: 5.89 (95%CI 2.99-10.66)<br>ref: the white. |
| Delmas et al., 2020   | May 2020       | Health care workers                              | 527/4607 (11.5)                                                                  | -                                                                                    |
| Costa et al., 2020    | May 2020       | Asymptomatic healthcare workers                  | 701/5645 (12.4)                                                                  |                                                                                      |
| Zhang et al., 2020    | May 2020       | Close contacts of COVID-19 patients              | 17/120 (14.2)                                                                    | -                                                                                    |
| Pan et al., 2020      | May 2020       | Community individuals                            | IgG or IgM: 1470/61437 (2.4)<br>IgG: 1200/61437 (2.0)<br>IgM: 324/61437 (2.4)    | -                                                                                    |

| Reference                    | Starting month | Study population                                                 | No. of positive/total no. of participants provided sera (seroprevalence rate, %) | Risk factors for SARS-CoV-2 infections (OR, 95%CI)                                                                                                                     |
|------------------------------|----------------|------------------------------------------------------------------|----------------------------------------------------------------------------------|------------------------------------------------------------------------------------------------------------------------------------------------------------------------|
| Akinbami et al., 2020        | May 2020       | Healthcare, First Response, and Public Safety Personnel          | 1131/16397 (6.9)                                                                 | Exposure to a household member with confirmed COVID-19: 6.18 (4.81-7.93), ref: no or unknown exposure;<br>Working within 15 km of the Detroit center: 5.60 (3.98-7.89) |
| Kempen et al., 2020          | May 2020       | Local residents                                                  | 3/99 (3.0)                                                                       | -                                                                                                                                                                      |
| Pagani et al., 2020          | May 2020       | Population of Castiglione D'Adda                                 | 115/509 (22.6)                                                                   | -                                                                                                                                                                      |
| Jespersen et al., 2020       | May 2020       | Healthcare workers and administrative personnel at the hospitals | 668/17948 (3.7)                                                                  | Nursing staff (7.3, 3.5–14.9), medical doctors (4.0, 1.8–8.9), and biomedical laboratory (5.0, 2.1–11.6) scientists; ref: medical secretaries                          |
| Ladhani et al., 2020         | May 2020       | Residents in care homes<br>Staffs in care homes                  | 84/118 (71.2)<br>113/164 (68.9)                                                  |                                                                                                                                                                        |
| Yogo et al., 2020            | May 2020       | High-risk healthcare workers                                     | 39/1554 (2.5)                                                                    | known community exposure to COVID-19 and Hispanic/Latino participants were associated with seropositivity.                                                             |
| Santos-Hövenner et al., 2020 | May 2020       | Kupferzell residents                                             | 167/2203 (7.6)                                                                   |                                                                                                                                                                        |



| Reference               | Starting month | Study population                                                                                 | No. of positive/total no. of participants provided sera (seroprevalence rate, %) | Risk factors for SARS-CoV-2 infections (OR, 95%CI)                                                                         |
|-------------------------|----------------|--------------------------------------------------------------------------------------------------|----------------------------------------------------------------------------------|----------------------------------------------------------------------------------------------------------------------------|
| Alserehi et al., 2020   | May 2020       | Healthcare workers in COVID-19 referral hospitals<br>Healthcare workers in nonaffected hospitals | 273/9379 (2.9)<br>26/3242 (0.8)                                                  | case-hospitals: OR 3.71, 95% CI: 2.47–5.55, ref: control- hospitals                                                        |
| Alali et al., 2020      | May 2020       | Migrant workers                                                                                  | IgG: 193/525 (36.8)<br>IgM: 43/525 (8.2)<br>IgG or IgM: 200/525 (38.1)           | Multivariate analysis:<br>Smokers: OR:0.49, (95% CI: 0.34 – 0.72); ref: non-smokers                                        |
| Del Brutto et al., 2020 | May 2020       | Inhabitants in Atahualpa                                                                         | IgG: 294/673 (43.7)<br>IgM: 256/673 (38.0)<br>IgG or IgM: 303/673 (45.0)         | -                                                                                                                          |
| Blairon et al., 2020    | May 2020       | Healthcare worker                                                                                | 217/1485 (14.6)                                                                  | -                                                                                                                          |
| Noh et al., 2020        | May 2020       | Outpatients                                                                                      | IgG: 1/1500 (0.1)<br>Neutralizing antibodies: 1/1500 (0.1)                       | -                                                                                                                          |
| Ho et al., 2020         | May 2020       | Outpatients and emergency department patients                                                    | Period 1: 7/9777 (0.1)<br>Period 2: 4/4988 (0.1)                                 | -                                                                                                                          |
| Murakami et al., 2020   | May 2020       | Emergency department healthcare providers                                                        | 7/138 (5.1)                                                                      | -                                                                                                                          |
| Lidström et al., 2020   | May 2020       | Healthcare staff                                                                                 | 577/8679 (6.6)                                                                   | Lower age (0.984, 0.978–0.991) and male sex (1.334, 1.104–1.612) were both associated with an increased risk of infection. |

| Reference                  | Starting month | Study population                                    | No. of positive/total no. of participants provided sera (seroprevalence rate, %) | Risk factors for SARS-CoV-2 infections (OR, 95%CI) |
|----------------------------|----------------|-----------------------------------------------------|----------------------------------------------------------------------------------|----------------------------------------------------|
| Haizler-Cohen et al., 2020 | May 2020       | Pregnant women                                      | 269/1671 (16.1)                                                                  | -                                                  |
| Martin et al., 2020        | May 2020       | Hospital staff                                      | 1148/10662 (10.8)                                                                | -                                                  |
| Black et al., 2020         | May 2020       | Co-workers at a UK renal transplant centre          | 24/200 (12.0)                                                                    | -                                                  |
| Kassem et al., 2020        | Jun 2020       | Healthcare workers employed in the gastroenterology | IgG:3/74 (4.05)<br>IgM:9/74 (12.2)<br>IgG or IgM: 9/74 (12.2)                    | -                                                  |
| Hibino et al., 2020        | Jun 2020       | Medical staff                                       | 6/806 (0.7)                                                                      | -                                                  |
| Predecki et al., 2020      | Jun 2020       | Kidney transplant recipients                        | 89/855 (10.4)                                                                    | -                                                  |
| Abdelmoniem et al., 2020   | Jun 2020       | Frontline healthcare workers                        | IgG: 23/203 (11.3)<br>IgM: 34/203 (16.7)<br>IgG or IgM: 37/203 (18.2)            | -                                                  |
| Nsn et al., 2020           | Jun 2020       | Nursing home residents                              | 173/241 (71.8)                                                                   | -                                                  |
| Pedersen et al.            | Jun 2020       | Retired blood donors<br>Active blood donors         | 22/1201 (1.8)<br>33/1110 (3.0)                                                   | -                                                  |

| Reference                 | Starting month | Study population                                          | No. of positive/total no. of participants provided sera (seroprevalence rate, %) | Risk factors for SARS-CoV-2 infections (OR, 95%CI)                                                                                                                                                    |
|---------------------------|----------------|-----------------------------------------------------------|----------------------------------------------------------------------------------|-------------------------------------------------------------------------------------------------------------------------------------------------------------------------------------------------------|
| Dimcheff et al., 2020     | Jun 2020       | Employees of a Veterans Affairs Healthcare System         | 72/1476 (4.9)                                                                    | Employees who reported exposure to a known COVID-19 case outside of work: 4.53 (2.67-7.68), ref: those that did not.                                                                                  |
| Mesnil et al., 2020       | Jun 2020       | Hospital professionals                                    | 78/646 (12.1)                                                                    | -                                                                                                                                                                                                     |
| Insúa et al., 2020        | Jun 2020       | Staff physicians and residents from a children's hospital | 1/116 (0.9)                                                                      | -                                                                                                                                                                                                     |
| Dimeglio et al., 2020     | Jun 2020       | Healthcare workers                                        | 263/8758 (3.0)                                                                   | Women had lower neutralizing antibody titers than men (p = 0.02) and asymptomatic HCW had lower neutralizing antibody titers than symptomatic workers (p<0.01)                                        |
| Mahajan et al., 2020      | Jun 2020       | Community residents                                       | 23/567 (4.1)                                                                     | -                                                                                                                                                                                                     |
| Dodd et al., 2020         | Jun 2020       | Blood donors                                              | 4786/160328 (3.0)                                                                | Donors who were aged 55 years and older: 2.43 (1.94-3.04); African American: 2.58 (1.71-3.88), Hispanic: 2.31 (1.77-3.00), ref: White donors; Donors from the Northeast: 1.83 (1.57-2.12), ref: West. |
| Martínez-Baz et al., 2020 | Jun 2020       | Health workers                                            | 637/8665 (7.4)                                                                   | -                                                                                                                                                                                                     |

| Reference              | Starting month | Study population                  | No. of positive/total no. of participants provided sera (seroprevalence rate, %)                                                                                                                                         | Risk factors for SARS-CoV-2 infections (OR, 95%CI)                                                                                                                                                                          |
|------------------------|----------------|-----------------------------------|--------------------------------------------------------------------------------------------------------------------------------------------------------------------------------------------------------------------------|-----------------------------------------------------------------------------------------------------------------------------------------------------------------------------------------------------------------------------|
| Anand et al., 2020     | Jun 2020       | Adult patients receiving dialysis | 2292/28503 (8.0)                                                                                                                                                                                                         | -                                                                                                                                                                                                                           |
| Lundkvist et al., 2020 | Jun 2020       | Randomly selected individuals     | IgG:<br>5/123 (4.1)<br>26/90 (28.9)                                                                                                                                                                                      | -                                                                                                                                                                                                                           |
| Younas et al., 2020    | Jun 2020       | Blood donors                      | 81/370 (21.9)                                                                                                                                                                                                            | -                                                                                                                                                                                                                           |
| Gujski et al., 2020    | Jun 2020       | Police employees                  | IgM or IgA: 450/5082 (8.9)<br>IgG: 217/5082 (4.3)                                                                                                                                                                        | -                                                                                                                                                                                                                           |
| Malani et al., 2020    | Jun 2020       | Mumbai residents                  | Matunga Non-slums: 200/1183 (16.9)<br>Matunga Slums: 1234/2121(58.2)<br>Chembur West Non-slums: 156/941(16.6)<br>Chembur West Slums: 864/1511(57.2)<br>Dahisar Non-slums: 67/578 (11.6)<br>Dahisar Slums: 298/570 (52.3) | -                                                                                                                                                                                                                           |
| Khan et al., 2020      | Jul 2020       | Hospital visitors                 | 111/2906 (3.8)                                                                                                                                                                                                           | Age 30-69 years, a recent history of symptoms of an influenza-like-illness, and a history of being placed under quarantine were significantly related to higher odds of the presence of SARS-CoV- 2 specific IgG antibodies |
| Pray et al., 2020      | Aug 2020       | Summer school retreat attendees   | 118/148 (80.0)                                                                                                                                                                                                           | -                                                                                                                                                                                                                           |

| Reference               | Starting month | Study population                                                                                         | No. of positive/total no. of participants provided sera (seroprevalence rate, %) | Risk factors for SARS-CoV-2 infections (OR, 95%CI) |
|-------------------------|----------------|----------------------------------------------------------------------------------------------------------|----------------------------------------------------------------------------------|----------------------------------------------------|
| Bloomfield et al., 2020 | Jul 2020       | General pediatric patients                                                                               | Total Ab:0/200 (0)<br>IgG or IgA:0/200 (0)                                       |                                                    |
| Kumar et al., 2020      | Jul 2020       | Healthcare workers                                                                                       | 0/635 (0.0)                                                                      |                                                    |
| Noor et al., 2020       | Jul 2020       | Healthcare worker in COVID-19 receiving hospital<br>Healthcare worker in non-COVID-19 receiving hospital | 124/439 (28.2)<br>187/572 (32.7)                                                 |                                                    |
| Yamaki et al., 2020     | Jul 2020       | Patients who had visited an affiliated outpatient clinic or emergency department                         | 81/992 (9.4)                                                                     |                                                    |
| Bajema et al., 2020     | Jul 2020       | Residual sera from commercial labs                                                                       | 8885/177919 (5.0)                                                                |                                                    |
| Godbout et al., 2020    | Jul 2020       | Healthcare workers                                                                                       | 27/1962 (1.4)                                                                    |                                                    |
| Silva et al., 2020      | Jul 2020       | Residents                                                                                                | 1167/3289 (35.5)                                                                 |                                                    |
| Kumar et al., 2020      | -              | HCWs from designated COVID-19 hospitals<br>HCWs from Non-COVID-19 hospitals                              | 35/401 (8.7)<br>54/400 (13.5)                                                    |                                                    |
| Chau et al., 2020       | Aug 2020       | Health care workers of a tertiary referral hospital                                                      | 0/408 (0)                                                                        |                                                    |
| Preprint database       |                |                                                                                                          |                                                                                  |                                                    |
| Sughayer et al., 2020   | Jan 2020       | Healthy blood donors                                                                                     | 0/746 (0)                                                                        |                                                    |
| Germain et al., 2020    | Jan 2020       | Tissue donors                                                                                            | ELISA:1/144 (0.7)<br>CLIA: 0/144 (0.0)                                           |                                                    |

| Reference                   | Starting month | Study population                                                                          | No. of positive/total no. of participants provided sera (seroprevalence rate, %)                                                                                                                                                           | Risk factors for SARS-CoV-2 infections (OR, 95%CI)                                                                                             |
|-----------------------------|----------------|-------------------------------------------------------------------------------------------|--------------------------------------------------------------------------------------------------------------------------------------------------------------------------------------------------------------------------------------------|------------------------------------------------------------------------------------------------------------------------------------------------|
| Martinez-Acuña et al., 2020 | Jan 2020       | Blood donors                                                                              | 77/1931 (4.0)                                                                                                                                                                                                                              | Donors aged 18 to 49 years (89.5%) were more likely to be seropositive compared to those aged 50 years or older (10.5%) (P<0.001)              |
| McCulloch et al., 2020      | Jan 2020       | Inpatients and outpatients who underwent routine screening                                | 10/916 (1.1)                                                                                                                                                                                                                               | -                                                                                                                                              |
| Chang et al., 2020          | Jan 2020       | Blood donors in Wuhan<br><br>Blood donors in Shijiazhuang<br><br>Blood donors in Shenzhen | Total antibodies:590/17794 (3.3);<br>Neutralizing antibodies:407/17794 (2.3)<br><br>Total antibodies:60/13540 (0.4)<br>Neutralizing antibodies:1/13540 (0.0)<br><br>Total antibodies:28/6810 (0.4)<br>Neutralizing antibodies:2/6810 (0.0) | Multivariate regression analysis revealed that age and gender were independent risk factors for the presence of antibodies against SARS-CoV-2. |
| Li et al., 2020             | Jan 2020       | Individuals with different ocular diseases                                                | IgG or IgM:11/1331 (0.8)<br>IgM:3/1331 (0.2)<br>IgG:9/1331 (0.7)                                                                                                                                                                           | -                                                                                                                                              |

| Reference               | Starting month | Study population                                          | No. of positive/total no. of participants provided sera (seroprevalence rate, %)                                               | Risk factors for SARS-CoV-2 infections (OR, 95%CI) |
|-------------------------|----------------|-----------------------------------------------------------|--------------------------------------------------------------------------------------------------------------------------------|----------------------------------------------------|
| Xiong et al., 2020      | Feb 2020       | Healthcare workers with intensive exposure to COVID-19    | IgG: 35/797 (4.4)<br>IgM: 3/797 (0.4)                                                                                          | -                                                  |
| Valenti et al., 2020    | Mar 2020       | Blood donors                                              | 40/789 (5.1)                                                                                                                   | -                                                  |
| Yu et al., 2020         | Feb 2020       | Health Care Workers                                       | 7/337 (2.1)                                                                                                                    | -                                                  |
| Kuvelker et al., 2020   | Feb 2020       | Household members of confirmed cases                      | IgG:81/179 (45.3)<br>Neutralizing antibodies (MN): 71/179 (39.7)<br>Neutralizing antibodies (NT): 51/179 (28.5)                | -                                                  |
| Liu et al., 2020        | Feb 2020       | Healthcare providers<br>general workers<br>other patients | IgG: 153/3832 (0.4); IgM: 57/3832 (1.5)<br>IgG: 900/19555 (4.6); IgM: 254/19555 (1.3)<br>IgG: 16/1616 (1.0); IgM: 3/1616 (0.2) | -                                                  |
| Kamath et al., 2020     | Feb 2020       | Healthy blood donors                                      | 57/1559 (3.7)                                                                                                                  | -                                                  |
| Santana et al., 2020    | Feb 2020       | Patients on disease-modifying anti-rheumatic drugs        | IgG:6/100 (6)<br>IgG or IgM:7/100 (7)                                                                                          | -                                                  |
| Tubiana et al., 2020    | Feb 2020       | Healthcare workers                                        | 15/147 (10.2)                                                                                                                  | -                                                  |
| Skowronski et al., 2020 | May 2020       | Anonymized residual sera were obtained from patients      | Neutralizing antibodies:<br>snapshot1: 0/869 (0.2)<br>snapshot2: 4/885 (0.5)                                                   | -                                                  |

| Reference             | Starting month | Study population                                                                 | No. of positive/total no. of participants provided sera<br>(seroprevalence rate, %)                                                                                                                                                                                                                                          | Risk factors for SARS-CoV-2 infections (OR, 95%CI) |
|-----------------------|----------------|----------------------------------------------------------------------------------|------------------------------------------------------------------------------------------------------------------------------------------------------------------------------------------------------------------------------------------------------------------------------------------------------------------------------|----------------------------------------------------|
| Vu et al., 2020       | Mar 2020       | Individuals undergoing routine diagnosis                                         | March:<br>IgG (NP): 72/3834 (1.9)<br>IgG (SP): 79/3834 (2.1)<br>Neutralizing antibodies: 1/3834 (0.0)<br>April:<br>IgG (NP): 273/3595 (7.6)<br>IgG (SP): 219/3595 (6.1)<br>Neutralizing antibodies: 88/3595 (2.4)<br>May:<br>IgG (NP): 329/3592 (9.2)<br>IgG (SP): 263/3592 (7.3)<br>Neutralizing antibodies: 105/3592 (2.9) | -                                                  |
| Dietrich et al., 2020 | Mar 2020       | Children from a Children's Hospital                                              | 62/812 (6.3)                                                                                                                                                                                                                                                                                                                 | -                                                  |
| Brehm et al., 2020    | Mar 2020       | Health care workers<br>non-health care workers;                                  | 9/1026 (0.9)<br>1/217 (0.4)                                                                                                                                                                                                                                                                                                  | -                                                  |
| Tang et al., 2020     | Mar 2020       | Outpatients in Zhongnan Hospital, Wuhan University (excluding COVID-19 patients) | IgG: 145/2952(4.9)<br>IgM: 51/2952 (1.7)                                                                                                                                                                                                                                                                                     | -                                                  |
| Augusto et al., 2020  | Mar 2020       | Health care workers                                                              | 15/385 (3.9)                                                                                                                                                                                                                                                                                                                 | -                                                  |



| Reference             | Starting month | Study population                                                                                                                                                                                         | No. of positive/total no. of participants provided sera (seroprevalence rate, %)                                    | Risk factors for SARS-CoV-2 infections (OR, 95%CI)                                                                                                                    |
|-----------------------|----------------|----------------------------------------------------------------------------------------------------------------------------------------------------------------------------------------------------------|---------------------------------------------------------------------------------------------------------------------|-----------------------------------------------------------------------------------------------------------------------------------------------------------------------|
| Wang et al., 2020     | Mar 2020       | HCWs who deployed to work in Wuhan<br>HCWs who deployed to work in Wuhan<br>HCWs who deployed to work in Wuhan<br>HCWs who remained in Hefei<br>HCWs who remained in Hefei<br>HCWs who remained in Hefei | IgM:0/142 (0.0)<br>IgG: 0/142 (0.0)<br>IgA: 0/142 (0.0)<br>IgM: 0/284 (0.0)<br>IgG: 0/284 (0.0)<br>IgA: 0/284 (0.0) | -                                                                                                                                                                     |
| Ling et al., 2020     | Mar 2020       | Back-to-work participants                                                                                                                                                                                | IgG: 627/18391 (3.4)<br>IgM: 89/18391 (0.5)<br>IgG or IgM: 657/18391 (3.5)                                          | -                                                                                                                                                                     |
| Paradiso et al., 2020 | Mar 2020       | Healthcare worker                                                                                                                                                                                        | IgG:1/606 (0.2)<br>IgM:3 /606 (0.5)                                                                                 | -                                                                                                                                                                     |
| Herzog et al., 2020   | Mar 2020       | Persons with blood samples collected from clinical lab                                                                                                                                                   | Period 1:100/3910 (2.6)<br>Period 2:193/3397 (5.7)                                                                  | Increasing age, male sex, smoking, and comorbidities such as cardiovascular diseases and diabetes have been identified as risk factors for developing severe illness. |
| Dopico et al., 2020   | Mar 2020       | Blood donor and Pregnant women                                                                                                                                                                           | 129/1900 (6.8)                                                                                                      | -                                                                                                                                                                     |
| Streeck et al., 2020  | Mar 2020       | Local inhabitants                                                                                                                                                                                        | IgG: 106/919 (11.5)<br>IgA: 170/919 (18.5)                                                                          | -                                                                                                                                                                     |
| Doi et al., 2020      | Mar 2020       | Patients who visited outpatient clinics with blood samples                                                                                                                                               | 33/1000 (0.3)                                                                                                       | -                                                                                                                                                                     |

| Reference             | Starting month | Study population                                                                             | No. of positive/total no. of participants provided sera<br>(seroprevalence rate, %) | Risk factors for SARS-CoV-2 infections (OR, 95%CI)                                                   |
|-----------------------|----------------|----------------------------------------------------------------------------------------------|-------------------------------------------------------------------------------------|------------------------------------------------------------------------------------------------------|
| Tosato et al., 2020   | Apr 2020       | Healthcare professionals                                                                     | IgG: 6/133 (4.5)<br>IgM: 0/133 (0.0)                                                | -                                                                                                    |
| Carozzi et al., 2020  | Apr 2020       | Health care workers                                                                          | IgG: 240/17098 (1.4)<br>IgM: 109/17098 (0.6)                                        | -                                                                                                    |
| Siddiqui et al., 2020 | Apr 2020       | Staff of a tertiary care hospital<br>Individuals visiting that hospital for COVID-19 testing | 74/448 (16.5)<br>78/332 (23.5)                                                      | Doctors (6/59, 10.2%) and nurses (7/72, 9.7%)<br>had lower seropositivity rates than the other staff |
| Davis et al., 2020    | Apr 2020       | Staff and postgraduate students                                                              | 124/1882 (6.6)                                                                      | -                                                                                                    |
| Kammon et al., 2020   | Apr 2020       | Community residents<br>healthcare workers                                                    | 6/142 (2.8)<br>0/77 (0.0)                                                           | -                                                                                                    |
| Wagner et al., 2020   | Apr 2020       | Working adults                                                                               | 14/1655 (0.8)                                                                       | -                                                                                                    |
| Bendavid et al., 2020 | Apr 2020       | Local residents                                                                              | 50/3330 (1.5)                                                                       | -                                                                                                    |
| Egerup et al., 2020   | Apr 2020       | Parturient women<br>partners of parturient women<br>newborns                                 | 29/1313 (2.2)<br>34/1189 (2.9)<br>17/1206 (1.4)                                     | -                                                                                                    |
| Krähling et al., 2020 | Apr 2020       | Employees in the Frankfurt metropolitan area                                                 | 5/1000 (0.5)                                                                        | -                                                                                                    |
| Richard et al., 2020  | Apr 2020       | General population                                                                           | Overall: 590/8344 (7.1)                                                             | -                                                                                                    |

| Reference               | Starting month | Study population                                                      | No. of positive/total no. of participants provided sera (seroprevalence rate, %) | Risk factors for SARS-CoV-2 infections (OR, 95%CI)                                                                                                                                                                                   |
|-------------------------|----------------|-----------------------------------------------------------------------|----------------------------------------------------------------------------------|--------------------------------------------------------------------------------------------------------------------------------------------------------------------------------------------------------------------------------------|
| Nopsopon et al., 2020   | Apr 2020       | Hospital staff, patients who needed procedural treatment or operation | IgM:<br>25/675 (3.7)<br>22/182 (12.1)<br>IgG:<br>1/675 (0.1)<br>1/182 (0.5)      | Participants with present upper respiratory tract symptoms had a higher rate of positive IgM than those without (9.6% vs. 4.5%)                                                                                                      |
| Leidner et al., 2020    | Apr 2020       | Healthcare workers                                                    | 253/10019 (2.5)                                                                  | Significantly increased seropositivity among HCW age 50 and above, with odds ratio of 1.51 (95% CI 1.17-1.94)                                                                                                                        |
| Halbrook et al., 2020   | Apr 2020       | Health system workers; first responders                               | 43/1108 (3.9)<br>55/679 (8.1)                                                    | -                                                                                                                                                                                                                                    |
| Fujita et al., 2020     | Apr 2020       | Healthcare workers                                                    | 5/92 (5.4)                                                                       | Univariate analysis:<br>Participants working at the otolaryngology department and/or having a history of seasonal common cold symptoms had a significantly higher titer of SARS-CoV-2 IgG antibody (p=0.046, p=0.046, respectively). |
| Bal et al., 2020        | Apr 2020       | Health care workers                                                   | 7/190 (3.7)                                                                      | -                                                                                                                                                                                                                                    |
| Psichogiou et al., 2020 | Apr 2020       | Healthcare workers from two hospitals                                 | 15/1495 (1.0)                                                                    | -                                                                                                                                                                                                                                    |

| Reference                       | Starting month | Study population                                                      | No. of positive/total no. of participants provided sera (seroprevalence rate, %) | Risk factors for SARS-CoV-2 infections (OR, 95%CI)                                                                                                                                                                                                                                                                                                       |
|---------------------------------|----------------|-----------------------------------------------------------------------|----------------------------------------------------------------------------------|----------------------------------------------------------------------------------------------------------------------------------------------------------------------------------------------------------------------------------------------------------------------------------------------------------------------------------------------------------|
| Thomas et al., 2020             | Apr 2020       | Health Care Workers<br>Asymptomatic outpatients                       | 38/1282 (3.0)<br>106/2379 (4.5)                                                  | -                                                                                                                                                                                                                                                                                                                                                        |
| Woon et al., 2020               | Apr 2020       | Asymptomatic healthcare workers                                       | 0/400 (0.0)                                                                      | -                                                                                                                                                                                                                                                                                                                                                        |
| Cohen et al., 2020              | Apr 2020       | Children consulting an ambulatory pediatrician                        | 63/543 (11.6)                                                                    | Contact with a person with proven COVID-19: OR 15.1 (95%CI 6.6-34.6).                                                                                                                                                                                                                                                                                    |
| Sikora et al., 2020             | Apr 2020       | Cancer center staff                                                   | IgM: 10/161 (6.2)<br>IgG: 5/161 (3.1)<br>IgG or IgM: 12/161 (7.5)                | -                                                                                                                                                                                                                                                                                                                                                        |
| Galán et al., 2020              | Apr 2020       | Healthcare workers wearing PPE<br>Healthcare workers with wearing PPE | 818/2590 (31.6)                                                                  | Multivariate analysis:<br>Being physicians (OR 2.37, CI95% 1.61-3.49), nurses (OR 1.67, 95%CI 1.14-2.46), or nurse-assistants (OR 1.84, 95%CI 1.24-2.73), HCW working at COVID-19 hospitalization areas (OR 1.71, 95%CI 1.22-2.40), non-COVID-19 hospitalization areas (OR 1.88, 95%CI 1.30-2.73), and at the Emergency Room (OR 1.51, 95%CI 1.01-2.27). |
| Garralda Fernandez et al., 2020 | Apr 2020       | Health care workers                                                   | IgG: 411/2439 (16.9)<br>IgM: 32/2439 (1.3)                                       | -                                                                                                                                                                                                                                                                                                                                                        |

| Reference              | Starting month | Study population                                             | No. of positive/total no. of participants provided sera (seroprevalence rate, %)      | Risk factors for SARS-CoV-2 infections (OR, 95%CI)                                                                                                                                                                               |
|------------------------|----------------|--------------------------------------------------------------|---------------------------------------------------------------------------------------|----------------------------------------------------------------------------------------------------------------------------------------------------------------------------------------------------------------------------------|
| Erber et al., 2020     | Apr 2020       | Clinical staff, non-clinical MRI staff, and medical students | 102/4554 (2.2)                                                                        | We found an association between seropositivity and male sex (OR 1.54 [95% CI, 1.03–2.27]) or age, with the highest frequency observed for the age group of 51–60 years (OR 1.75 [95% CI, 1.06–2.85] compared to those ≤30 years) |
| Garritsen et al., 2020 | Apr 2020       | Individuals that had experiencing symptoms                   | 1481/7241 (20.5)                                                                      | -                                                                                                                                                                                                                                |
| Snoeck et al., 2020    | Apr 2020       | General population                                           | IgG: 35/1820 (2.0), IgA: 201/1820 (11.0)                                              | -                                                                                                                                                                                                                                |
| Comar et al., 2020     | Apr 2020       | Healthcare worker                                            | 52/727 (7.2)                                                                          | Multivariate analysis:<br>Being medical doctor: 1.82                                                                                                                                                                             |
| Nisar et al., 2020     | Apr 2020       | Households                                                   | Apr: 2/1000 (0.2)<br>Jun: 164/1004 (16.3)                                             | -                                                                                                                                                                                                                                |
| Wang et al., 2020      | Apr 2020       | Communities residents                                        | IgG: 13/2184 (0.6)<br>IgG, IgM: 3/2184 (0.1)<br>Neutralizing antibodies: 0/2184 (0.0) | -                                                                                                                                                                                                                                |
| Lisandru et al., 2020  | Apr 2020       | Patients having carried out a blood analysis                 | 59/1973 (3.0)                                                                         | -                                                                                                                                                                                                                                |
| Zou et al., 2020       | Apr 2020       | Local residents                                              | IgG: 3/127 (2.4)<br>IgM: 6/127 (4.7)<br>IgG or IgM: 9/127 (7.1)                       | -                                                                                                                                                                                                                                |

| Reference              | Starting month | Study population                       | No. of positive/total no. of participants provided sera (seroprevalence rate, %) | Risk factors for SARS-CoV-2 infections (OR, 95%CI)                                                                                                                                                                                          |
|------------------------|----------------|----------------------------------------|----------------------------------------------------------------------------------|---------------------------------------------------------------------------------------------------------------------------------------------------------------------------------------------------------------------------------------------|
| Nopsopon et al., 2020  | Apr 2020       | Healthcare staff                       | IgG: 0/844 (0)<br>IgM: 7/844 (0.8)<br>IgG or IgM: 7/844 (0.8)                    | Female staff seemed to have higher rate of positive IgM (1.0%, 95% CI: 0.5%, 2.1%) than male (0.5%, 95% CI: 0.1%, 2.6%)                                                                                                                     |
| McDade et al., 2020    | Apr 2020       | Household members of essential workers | 33/202 (16.3)                                                                    | -                                                                                                                                                                                                                                           |
| Baker et al., 2020     | Apr 2020       | Medical staff members                  | 586/10275 (5.7)                                                                  | Community contact with a person known or suspected to have COVID-19 (aOR=1.9, 95% CI:1.4-2.5) and zip code level COVID-19                                                                                                                   |
| Appa et al., 2020      | Apr 2020       | Residents and county essential workers | CLISA:9/1810 (0.5)<br>ELISA:4/1810 (0.2)                                         | -                                                                                                                                                                                                                                           |
| Baxendale et al., 2020 | Apr 2020       | Medical staff                          | 70/493 (14.2)                                                                    | -                                                                                                                                                                                                                                           |
| Elli et al., 2020      | Apr 2020       | Celiac disease patients                | IgG or IgA: 20/109 (18.3)<br>IgG: 15/109 (13.8)<br>IgA: 16/109 (14.7)            | -                                                                                                                                                                                                                                           |
| Takita et al., 2020    | May 2020       | Inhabitants                            | 41/1071(3.8)                                                                     | Univariate analysis:<br><br>The central Tokyo of 23 special wards exhibited a significantly higher prevalence compared to the other area of Tokyo (p =0.02, 4.68% (95%CI: 3.08-6.79) versus 1.83 (0.68-3.95) in central and suburban Tokyo. |

| Reference               | Starting month | Study population                                     | No. of positive/total no. of participants provided sera (seroprevalence rate, %)                                  | Risk factors for SARS-CoV-2 infections (OR, 95%CI) |
|-------------------------|----------------|------------------------------------------------------|-------------------------------------------------------------------------------------------------------------------|----------------------------------------------------|
| Tönshoff et al., 2020   | Apr 2020       | Children and their parents                           | IgG:70/4964 (1.4)<br>Neutralizing antibodies: 66/4964 (1.3)                                                       | -                                                  |
| Mortgat et al., 2020    | Apr 2020       | Healthcare worker                                    | 59/699 (8.4)                                                                                                      | -                                                  |
| Jerković et al., 2020   | Apr 2020       | Industry workers                                     | IgG: 13/1494 (0.9)<br>IgM: 9/1494 (0.6)<br>IgG or IgM: 19/1494 (1.3)                                              | -                                                  |
| Alessandro et al., 2020 | Apr 2020       | Health Care Workers<br>General population            | 400/2415 (16.6)<br>534/1792 (29.8)                                                                                | -                                                  |
| Dillner et al., 2020    | Apr 2020       | Healthy hospital employees                           | 1481/12928 (11.5)                                                                                                 | -                                                  |
| Alemu et al., 2020      | Apr 2020       | Residents                                            | 23/301 (7.6)                                                                                                      | -                                                  |
| Aziz et al., 2020       | Apr 2020       | Community residents                                  | ELISA:46/4755 (1.0)<br>Immunofluorescent test:26/4755 (0.6)<br>Plaque reduction neutralization test:17/4755 (0.4) | -                                                  |
| Chamie et al., 2020     | Apr 2020       | All residents (>4 years) and workers in census tract | 131/3861 (3.4)                                                                                                    | -                                                  |
| Nesbitt et al., 2020    | Apr 2020       | Blood donor                                          | LFIA: IgM: 68/1996 (3.4); IgG: 13/1996 (0.7)<br>CLIA:14/1996(0.7)                                                 | -                                                  |

| Reference             | Starting month | Study population                                                  | No. of positive/total no. of participants provided sera (seroprevalence rate, %)                | Risk factors for SARS-CoV-2 infections (OR, 95%CI)                                                                                                                                                                                                                                         |
|-----------------------|----------------|-------------------------------------------------------------------|-------------------------------------------------------------------------------------------------|--------------------------------------------------------------------------------------------------------------------------------------------------------------------------------------------------------------------------------------------------------------------------------------------|
| Wells et al., 2020    | Apr 2020       | Members of the Twins K cohort                                     | 51/431 (11.8)                                                                                   | Seropositive participants were older (median age seropositive 48, median age seronegative 36; $p = 0.046$ ). No difference in sex (% female of seropositive participants 72, and 87 for seronegative) or BMI (median 23.8 seropositive; 22.8 seronegative) was evident between the groups. |
| Fontanet et al., 2020 | Apr 2020       | Pupils, their parents and relatives, and staff of primary schools | 139/1340 (10.4)                                                                                 | -                                                                                                                                                                                                                                                                                          |
| Anna et al., 2020     | Apr 2020       | Institute Curie workers                                           | IgG (NP): 183/1847 (9.9)<br>IgG (SP): 181/1847 (9.8)<br>Neutralizing antibodies: 176/1847 (9.5) | -                                                                                                                                                                                                                                                                                          |
| Sandri et al., 2020   | Apr 2020       | Healthcare workers                                                | 447/3985 (11.2)                                                                                 | -                                                                                                                                                                                                                                                                                          |
| Calife et al., 2020   | Jun 2020       | Residents                                                         | 33/2342 (1.4)                                                                                   | -                                                                                                                                                                                                                                                                                          |
| Brant et al., 2020    | May 2020       | Healthcare workers                                                | 31/2932 (1.1)                                                                                   | Significant differences between observed negative and positive cases were found for age ( $z = 2.65$ , $p = 0.008$ ), race ( $p = 0.037$ ), presence of fever ( $p < 0.001$ ), and loss of smell ( $p < 0.001$ )                                                                           |



| Reference                   | Starting month | Study population                                                                                                             | No. of positive/total no. of participants provided sera (seroprevalence rate, %)                                                                                                                                     | Risk factors for SARS-CoV-2 infections (OR, 95%CI) |
|-----------------------------|----------------|------------------------------------------------------------------------------------------------------------------------------|----------------------------------------------------------------------------------------------------------------------------------------------------------------------------------------------------------------------|----------------------------------------------------|
| Brant-Zawadzki et al., 2020 | May 2020       | Healthcare Workers<br><br>First responders                                                                                   | May: 32/3458 (0.9)<br>July: 28/2754 (1.0)<br>May: 12/226 (5.3)<br>July: 1/92 (1.1)                                                                                                                                   | -                                                  |
| Jones et al., 2020          | May 2020       | HCWs and support staff                                                                                                       | -                                                                                                                                                                                                                    | -                                                  |
| Li et al., 2020             | May 2020       | Patients with ocular surface diseases<br><br>Patients with no-ocular surface diseases<br><br>Patients without ocular disease | IgG: 1/330 (0.3)<br>IgM: 5/330 (1.5)<br>IgG or IgM: 6/330 (1.8)<br><br>IgG: 5/4614 (0.1)<br>IgM: 6/4614 (0.1)<br>IgG or IgM: 10/4614 (0.2)<br><br>IgG: 1/1470 (0.1)<br>IgM: 3/1470 (0.2)<br>IgG or IgM: 4/1470 (0.3) |                                                    |
| Barallat et al., 2020       | May 2020       | Healthcare worker                                                                                                            | IgG (SP): 712/7563 (9.4)<br>IgG (SP or NP): 779/7563 (10.3)                                                                                                                                                          | -                                                  |

| Reference                  | Starting month | Study population                                             | No. of positive/total no. of participants provided sera (seroprevalence rate, %)                   | Risk factors for SARS-CoV-2 infections (OR, 95%CI)                                                                                                                                    |
|----------------------------|----------------|--------------------------------------------------------------|----------------------------------------------------------------------------------------------------|---------------------------------------------------------------------------------------------------------------------------------------------------------------------------------------|
| Tess et al., 2020          | May 2020       | Local inhabitants                                            | IgG: 21/517 (4.1)<br>IgM: 7/517 (1.4)<br>IgG or IgM: 27/517 (5.2)                                  | -                                                                                                                                                                                     |
| Mattern et al., 2020       | May 2020       | All patients admitted to the delivery room                   | 20/249 (8.0)                                                                                       | -                                                                                                                                                                                     |
| Carrat et al., 2020        | May 2020       | General adult population                                     | IgG (SP): 983/14628 (6.7)<br>IgG (NP): 511/14628 (3.5)<br>Neutralizing antibodies: 424/14628 (2.9) | -                                                                                                                                                                                     |
| Samore et al., 2020        | May 2020       | Community-representative participants                        | 89/8108 (1.1)                                                                                      | -                                                                                                                                                                                     |
| Dupraz et al., 2020        | May 2020       | Household members<br>Close contacts outside the household    | 160/302 (53.0)<br>12/69 (17.4)                                                                     | Household members aged 65 or more: aOR 3.63, 95%CI 1.05-12.60, ref: younger adults; those not strictly adhering to simple hygiene rules like hand washing: aOR 1.80, 95%CI 1.02-3.17. |
| Royo-Cebrecos et al., 2020 | May 2020       | Entire population in Andorra                                 | First survey: 6816/70389 (9.7)<br>Second survey: 5433/63708 (8.5)                                  | -                                                                                                                                                                                     |
| McLaughlin et al., 2020    | May 2020       | Residents                                                    | 208/917 (22.7)                                                                                     | -                                                                                                                                                                                     |
| Rauber et al., 2020        | May 2020       | Individuals undergone liver transplantation                  | 7/219 (3.2)                                                                                        | -                                                                                                                                                                                     |
| McBride et al., 2020       | May 2020       | Outpatients coming into the Department of Radiation Oncology | 44/919 (4.8)                                                                                       | -                                                                                                                                                                                     |

| Reference            | Starting month | Study population                                | No. of positive/total no. of participants provided sera (seroprevalence rate, %)                                                 | Risk factors for SARS-CoV-2 infections (OR, 95%CI)                                                                                 |
|----------------------|----------------|-------------------------------------------------|----------------------------------------------------------------------------------------------------------------------------------|------------------------------------------------------------------------------------------------------------------------------------|
| Jögi et al., 2020    | May 2020       | Participants consulted in general practitioners | 60/1960 (3.1)                                                                                                                    | -                                                                                                                                  |
| Ebinger et al., 2020 | May 2020       | Health Care Workers                             | 212/6062 (3.5)                                                                                                                   | The strongest self-reported symptom associated with greater odds of seropositive status was anosmia (11.53 [7.51, 17.70], P<0.001) |
| Hurk et al., 2020    | May 2020       | Blood donor                                     | 419/7150 (5.9)                                                                                                                   | -                                                                                                                                  |
| Hassan et al., 2020  | May 2020       | Home care employees                             | 81/403 (20.1)                                                                                                                    | -                                                                                                                                  |
| Weis et al., 2020    | May 2020       | Community residents                             | 52/620 (8.4)                                                                                                                     | -                                                                                                                                  |
| Rigatti et al., 2020 | May 2020       | Life insurance applicants                       | 1520/50025 (3.0)                                                                                                                 | -                                                                                                                                  |
| Faniyi et al., 2020  | May 2020       | Health care workers                             | 214/392 (54.6)                                                                                                                   | -                                                                                                                                  |
| Stout et al., 2020   | May 2020       | Life insurance applicants                       | 547/18441 (3.0)<br>981/31822 (3.1)<br>4180/63103 (6.6)                                                                           | -                                                                                                                                  |
| Gomes et al., 2020   | May 2020       | Maternity healthcare workers                    | 97/4608 (2.1)                                                                                                                    | -                                                                                                                                  |
| Wu et al., 2020      | May 2020       | People living with HIV<br>HIV-naïve residents   | IgG: 3/857 (0.3); IgM: 3/857 (0.3); IgG or IgM: 4/857 (0.5)<br>IgG: 54/1048 (5.2); IgM: 35/1048 (3.3); IgG or IgM: 66/1048 (6.3) | -                                                                                                                                  |

| Reference                | Starting month | Study population                                   | No. of positive/total no. of participants provided sera (seroprevalence rate, %)             | Risk factors for SARS-CoV-2 infections (OR, 95%CI) |
|--------------------------|----------------|----------------------------------------------------|----------------------------------------------------------------------------------------------|----------------------------------------------------|
| Rebeiro et al., et al.   | May 2020       | Health care workers                                | 116/11787 (1.0)                                                                              | -                                                  |
| Schubl et al.            | May 2020       | Healthcare worker                                  | 165/1557 (10.6)                                                                              | -                                                  |
| Majdoubi et al., 2020    | May 2020       | Adult residents                                    | 3/276 (1.1)                                                                                  | -                                                  |
| Nakamura et al., 2020    | May 2020       | Healthcare workers                                 | CLIA (Abbott): 4/1000 (0.4); CLIA (Roche): 0/1000 (0.0); POC qualitative test: 33/1000 (3.3) | -                                                  |
| Tsertsvadze et al., 2020 | May 2020       | Adult residents of capital city of Tbilisi         | 9/1068 (0.8)                                                                                 | -                                                  |
| Reuben et al., 2020      | May 2020       | First responders                                   | 11/310 (3.5)                                                                                 | -                                                  |
| Bahrs et al., 2020       | May 2020       | Employees at a University Hospital                 | 18/660 (2.7)                                                                                 | -                                                  |
| Chibwana et al., 2020    | May 2020       | Health care workers                                | 84/500 (16.8)                                                                                | -                                                  |
| Laub et al., 2020        | May 2020       | Children with pediatric multiorgan immune syndrome | 162/2832 (5.7)                                                                               | -                                                  |
| Armann et al., 2020      | May 2020       | Students and teachers                              | Students:11/1538 (0.7)<br>Teachers:1/507 (0.2)                                               | -                                                  |
| Hibino et al., 2020      | May 2020       | Healthy volunteers working for a Japanese company  | IgG: 95/350 (27.1)<br>IgM: 90/350 (25.7)                                                     | -                                                  |
| Barchuk et al., 2020     | May 2020       | Adults residents                                   | IgG:97/1038 (9.3)<br>Total antibodies: 107/1035 (10.3)                                       | -                                                  |

| Reference              | Starting month | Study population                                                                     | No. of positive/total no. of participants provided sera (seroprevalence rate, %) | Risk factors for SARS-CoV-2 infections (OR, 95%CI)                                                                                                                                                                                                                                                                                                                                                                                                                                                                   |
|------------------------|----------------|--------------------------------------------------------------------------------------|----------------------------------------------------------------------------------|----------------------------------------------------------------------------------------------------------------------------------------------------------------------------------------------------------------------------------------------------------------------------------------------------------------------------------------------------------------------------------------------------------------------------------------------------------------------------------------------------------------------|
| Wilkins et al., 2020   | May 2020       | Healthcare workers                                                                   | 316/6510 (4.9)                                                                   | Known out-of-hospital exposure was 4.7 (3.5-6.4), ref: without out-of-hospital exposure;<br>Participants with a family member who tested positive for COVID-19: 26.8 (17.3-41.8), ref: Participants without a positive family;<br>Services (3.0, 1.2-6.4); medical assistants (2.9, 1.4-5.5); nurses (2.12, 1.5-3.2) had higher odds: ref: administrators;<br>Participating in the care of COVID-19 patients: 2.19 (1.61-3.01), ref: participants who did not report participating in the care of COVID-19 patients. |
| Abo-Leyah et al., 2020 | May 2020       | Health and social care workers;<br>Blood Samples taken at general practice surgeries | 299/2062 (14.5)<br>11/231 (4.8)                                                  | -                                                                                                                                                                                                                                                                                                                                                                                                                                                                                                                    |
| Vince et al., 2020     | May 2020       | Football players and club staff                                                      | IgG: 1/305 (0.3)<br>IgG: 2/305 (0.7)<br>IgA: 24/349 (6.9)                        | -                                                                                                                                                                                                                                                                                                                                                                                                                                                                                                                    |
| Alkurt et al., 2020    | May 2020       | Healthcare workers                                                                   | 22/813 (2.7)                                                                     | -                                                                                                                                                                                                                                                                                                                                                                                                                                                                                                                    |
| Vassallo et al., 2020  | Jun 2020       | Blood Donors                                                                         | 2948/189656 (1.6)                                                                | -                                                                                                                                                                                                                                                                                                                                                                                                                                                                                                                    |

| Reference                 | Starting month | Study population                                                               | No. of positive/total no. of participants provided sera (seroprevalence rate, %)                             | Risk factors for SARS-CoV-2 infections (OR, 95%CI) |
|---------------------------|----------------|--------------------------------------------------------------------------------|--------------------------------------------------------------------------------------------------------------|----------------------------------------------------|
| Melo et al., 2020         | Jun 2020       | Healthcare workers                                                             | IgM: 28/471 (5.9)<br>IgG: 64/471 (13.6)                                                                      | -                                                  |
| Favara et al., 2020       | Jun 2020       | Hospital staff working in an oncology department                               | Rapid POC serology: 34/434 (7.8)<br>Microsphere-based assay: 80/434 (18.4)                                   | -                                                  |
| Remes-Troche et al., 2020 | Jun 2020       | Adults outpatients                                                             | 642/2174 (29.5)                                                                                              | -                                                  |
| Ladage et al., 2020       | -              | Inhabitants in a township                                                      | IgG (LIFA) :28/835 (3.4)<br>IgM (LIFA):2/835 (0.2)<br>IgG (ELISA) :71/835 (8.5)<br>IgA (ELISA) :75/835 (9.0) | -                                                  |
| Silva et al., 2020        | Jun 2020       | Health care workers from public facilities                                     | 5/738 (0.7)                                                                                                  | -                                                  |
| Craigie et al., 2020      | Jun 2020       | Probable cases and higher risk individuals                                     | 8/1127 (0.7)<br>1/9 (11.1)                                                                                   | -                                                  |
| Silva et al., 2020        | Jun 2020       | Professionals in research institute                                            | 32/406 (7.9)                                                                                                 | -                                                  |
| Strazzulla et al., 2020   | Jun 2020       | Nursing home residents                                                         | 34/61 (55.7)                                                                                                 | -                                                  |
| Ray et al., 2020          | Jun 2020       | Patients who were admitted to the medicine wards and intensive care unit (ICU) | 42/212 (19.8)                                                                                                | -                                                  |

| Reference            | Starting month | Study population                                                               | No. of positive/total no. of participants provided sera<br>(seroprevalence rate, %)                | Risk factors for SARS-CoV-2 infections (OR, 95%CI) |
|----------------------|----------------|--------------------------------------------------------------------------------|----------------------------------------------------------------------------------------------------|----------------------------------------------------|
| Bardai et al., 2020  | Jun 2020       | children patients<br>accompanying persons<br>hospital employees                | 3/39 (7.7)<br>7/61 (11.5)<br>12/99 (12.1)                                                          | -                                                  |
| Cooper et al., 2020  | Jun 2020       | Staff member                                                                   | 410/5698 (7.2)                                                                                     | -                                                  |
| Hommel et al., 2020  | Jun 2020       | Students and teachers                                                          | 7/527 (1.3)                                                                                        | -                                                  |
| Nishida et al., 2020 | Jun 2020       | Hospital staff                                                                 | 4/925 (0.4)                                                                                        | -                                                  |
| Nawa et al., 2020    | Jun 2020       | Households randomly selected from Utsunomiya City's basic<br>resident registry | 3/742 (0.7)                                                                                        | -                                                  |
| Qutob et al., 2020   | Jun 2020       | West Bank's residents<br>Individuals visiting medical laboratories             | 0/1319 (0.0)<br>4/1136 (0.4)                                                                       | -                                                  |
| Khan et al., 2020    | Jun 2020       | Healthcare Workers                                                             | 73/2905 (2.5)                                                                                      | -                                                  |
| Haq et al., 2020     | Jun 2020       | Healthcare Workers                                                             | 310/1011 (30.7)                                                                                    | -                                                  |
| Jin et al., 2020     | Jun 2020       | Blood Donors                                                                   | Total antibodies: 121/1000 (12.1)<br>IgG:109/1000 (10.9)<br>Neutralizing antibodies: 91/1000 (9.1) | -                                                  |
| Ulyte et al., 2020   | Jun 2020       | School children                                                                | Baseline:74/2496 (3.0)<br>Follow up: 173/2503(7.0)                                                 | -                                                  |

| Reference               | Starting month | Study population                                                                 | No. of positive/total no. of participants provided sera (seroprevalence rate, %) | Risk factors for SARS-CoV-2 infections (OR, 95%CI)                                                                                                                                                                 |
|-------------------------|----------------|----------------------------------------------------------------------------------|----------------------------------------------------------------------------------|--------------------------------------------------------------------------------------------------------------------------------------------------------------------------------------------------------------------|
| Asuquo et al., 2020     | Jun 2020       | Clinic staff and patients                                                        | 17/66 (25.8)                                                                     | -                                                                                                                                                                                                                  |
| Ward et al., 2020       | Jun 2020       | Community adults                                                                 | Jun: 5544/99908 (5.6)<br>July: 4995/105829 (4.7)<br>Sep: 7037/159367 (4.4)       | -                                                                                                                                                                                                                  |
| Menezes et al., 2020    | Jun 2020       | Community residents                                                              | 849/31869 (2.7)                                                                  | -                                                                                                                                                                                                                  |
| Laursen et al., 2020    | Jun 2020       | Employees in a rescue corps                                                      | 159/3243 (4.9)                                                                   | -                                                                                                                                                                                                                  |
| Kahlert et al., 2020    | Jun 2020       | Hospital Workers                                                                 | 139/4664 (3.0)                                                                   | Non- occupational exposures independently associated with seropositivity were contact with a COVID-19 positive household (adjusted OR=54, 95%-CI: 31-97) and stay in a COVID-19 hotspot (aOR=2.2, 95%-CI: 1.1-3.9) |
| ROEDERER et al., 2020   | Jun 2020       | Residents in food distribution sites, emergency shelters, and workers residences | 303/818 (37.0)                                                                   | -                                                                                                                                                                                                                  |
| Demonbreun et al., 2020 | Jun 2020       | Community/university-based participants                                          | 306/1545 (19.8)                                                                  | -                                                                                                                                                                                                                  |
| Ariza et al., 2020      | Jun 2020       | medical trainees or medical doctors                                              | 8/351 (2.3)                                                                      | -                                                                                                                                                                                                                  |
| Majiya et al., 2020     | Jun 2020       | Residents                                                                        | IgG: 47/185 (25.4)<br>IgM:4/185 (2.2)                                            | -                                                                                                                                                                                                                  |



| Reference                 | Starting month | Study population                                                                                | No. of positive/total no. of participants provided sera (seroprevalence rate, %) | Risk factors for SARS-CoV-2 infections (OR, 95%CI)                                                        |
|---------------------------|----------------|-------------------------------------------------------------------------------------------------|----------------------------------------------------------------------------------|-----------------------------------------------------------------------------------------------------------|
| Javed et al., 2020        | Jul 2020       | Working population                                                                              | IgG:2543/24210 (10.5)<br>IgM:2783/24210 (11.5)<br>IgG, IgM:4234/24210 (17.5)     | -                                                                                                         |
| Buonsenso et al., 2020    | Jun 2020       | Household contacts of index patients                                                            | 44/80 (55.0)                                                                     | -                                                                                                         |
| Kasztelewicz et al., 2020 | Jul 2020       | Healthcare workers in a tertiary pediatric hospital                                             | 16/1879 (0.9)                                                                    | -                                                                                                         |
| Malecki et al., 2020      | Jul 2020       | Adults and children                                                                             | Jul-Aug: 14/996 (1.4)<br>Oct-Dec: 65/994 (6.5)                                   | -                                                                                                         |
| FUKUDA et al., 2020       | Jul 2020       | Healthcare workers with low exposure risk at a frontline hospital                               | 14/4147(0.3)                                                                     | -                                                                                                         |
| Díaz-Salazar et al., 2020 | Jul 2020       | Government employees                                                                            | 193/3268(5.9)                                                                    | Those who reported symptoms of COVID-19 in the previous four weeks to the survey: OR 4.1, 95% CI 2.9-5.5. |
| Bruckner et al., 2020     | Jul 2020       | Adults residents                                                                                | 351/2979 (11.8)                                                                  | -                                                                                                         |
| Goenka et al., 2020       | Jul 2020       | High-risk Healthcare workers<br>Moderate-risk Healthcare workers<br>Low-risk Healthcare workers | 27/136 (19.9)<br>101/911 (11.1)<br>6/75 (8.0)                                    | -                                                                                                         |
| Flemand et al., 2020      | Jul 2020       | Individuals visiting the recruitment centers                                                    | 63/480 (13.1)                                                                    | -                                                                                                         |

| Reference                | Starting month | Study population                         | No. of positive/total no. of participants provided sera (seroprevalence rate, %)                    | Risk factors for SARS-CoV-2 infections (OR, 95%CI)                                                                                                                                       |
|--------------------------|----------------|------------------------------------------|-----------------------------------------------------------------------------------------------------|------------------------------------------------------------------------------------------------------------------------------------------------------------------------------------------|
| Lopez et al., 2020       | Jul 2020       | School employees                         | 22/753 (2.9)                                                                                        | -                                                                                                                                                                                        |
| Ghose et al., 2020       | Jul 2020       | Community residents                      | 857/1659 (51.7)                                                                                     | Living in slums (OR 1.91; 95%CI 1.34-2.73; p=0.007) or in dwellings with per-capita floor space <5 m <sup>2</sup> (OR 2.09; 95%CI 1.43-3.04) were identified as independent risk factors |
| Pasqualotto et al., 2020 | Jul 2020       | Military police forces                   | IgG: 28/1592 (1.8)<br>IgA: 43/1592 (2.7)                                                            | -                                                                                                                                                                                        |
| Satpati et al., 2020     | Jul 2020       | Population of Paschim Medinipur District | 19/458 (4.2)                                                                                        | -                                                                                                                                                                                        |
| Al-Thani et al., 2020    | Jul 2020       | The craft and manual worker              | 1427/2641(55.3)                                                                                     | -                                                                                                                                                                                        |
| Sharma et al., 2020      | Aug 2020       | Residents                                | first round: 4267/15046 (28.4)<br>second round: 4311/17409 (24.8)<br>third round: 3829/15015 (25.5) | -                                                                                                                                                                                        |
| Kshatri et al., 2020     | Aug 2020       | Adult population                         | 842/4146 (20.3)                                                                                     | -                                                                                                                                                                                        |

| Reference                | Starting month | Study population                                                                                | No. of positive/total no. of participants provided sera<br>(seroprevalence rate, %)                       | Risk factors for SARS-CoV-2 infections (OR, 95%CI) |
|--------------------------|----------------|-------------------------------------------------------------------------------------------------|-----------------------------------------------------------------------------------------------------------|----------------------------------------------------|
| Cruz-Arenas et al., 2020 | Aug 2020       | Health care workers in a 'non-COVID' hospital                                                   | LIFA:<br>IgG:31/300 (10.3)<br>IgM:15/300 (5.0)<br>IgG or IgM:33/300 (11.0)<br>ELISA:<br>IgG:39/299 (13.0) | -                                                  |
| Murhekar et al., 2020    | Aug 2020       | General population                                                                              | 3135/29082 (10.8)                                                                                         | -                                                  |
| Rezwan et al., 2020      | Sep 2020       | Industrial workers<br>Healthcare workers<br>Healthy voluntary blood donors<br>Dialysis patients | 779/1118 (70.0)<br>234/478 (49.0)<br>191/505 (37.8)<br>118/303 (38.9)                                     | -                                                  |
| Babu et al., 2020        | Sep 2020       | General population                                                                              | 2565/15939 (16.1)                                                                                         | -                                                  |
| Thielecke et al., 2020   | Sep 2020       | Kindergarten children, staff and connected household members                                    | 1/672 (0.1)                                                                                               | -                                                  |
| Ladage et al., 2020      | Oct 2020       | Inhabitants                                                                                     | IgG or IgA:140/242(57.9)<br>IgG:110/242 (45.4)<br>IgA:116/242 (47.9)                                      | -                                                  |
| Kumar et al., 2020       | Jun 2020       | Healthcare worker                                                                               | CLIA: 14/996 (1.4)<br>ELISA: 22/996 (2.2)                                                                 | -                                                  |

| Reference                                  | Starting month | Study population          | No. of positive/total no. of participants provided sera (seroprevalence rate, %)                                                       | Risk factors for SARS-CoV-2 infections (OR, 95%CI) |
|--------------------------------------------|----------------|---------------------------|----------------------------------------------------------------------------------------------------------------------------------------|----------------------------------------------------|
| Official reports                           |                |                           |                                                                                                                                        |                                                    |
| MedLife, Romania, 2020                     |                | Healthcare workers        | 11/371 (3.0)                                                                                                                           | -                                                  |
| Public Health Ontario, Canada, 2020        | Mar 2020       | Residual serum samples    | March 2020: 3/827 (0.4)<br>May 2020: 15/1061 (1.4)<br>June 2020: 79/7014 (1.1)<br>July 2020: 70/7001 (1)<br>August 2020: 72/6789 (1.1) | -                                                  |
| Norwegian Institute of Public Health, 2020 | Apr 2020       | Residual serum samples    | 10/900 (1.1)                                                                                                                           | -                                                  |
| Office of National Statistics, UK, 2020    | Apr 2020       | General population        | 476/9343 (5.1)                                                                                                                         | -                                                  |
| Government of Jersey, UK, 2020             | Apr 2020       | Adult resident population | Baseline: 24/855 (2.9)<br>1st follow-up: 45/1062 (4.2)<br>2nd follow-up: 62/1386 (4.5)                                                 | -                                                  |
| Canadian Blood Services, 2020              | May 2020       | Blood donor               | 275/37737 (0.7)                                                                                                                        | -                                                  |

| Reference                                                                    | Starting month | Study population                                       | No. of positive/total no. of participants provided sera (seroprevalence rate, %) | Risk factors for SARS-CoV-2 infections (OR, 95%CI) |
|------------------------------------------------------------------------------|----------------|--------------------------------------------------------|----------------------------------------------------------------------------------|----------------------------------------------------|
| Ministry of Health, Labour and Welfare, Japan, 2020                          | Jun 2020       | Residents                                              | 2/1971 (0.1)<br>5/2970 (0.2)<br>1/3009 (0.0)                                     | -                                                  |
| NHS BT collection, 2020                                                      | Jun 2020       | Blood donor                                            | 1051/16670 (6.3)                                                                 | -                                                  |
| RCGP collection, 2020                                                        | Jun 2020       | Sera collected via general practitioners               | 205/4315 (4.8)                                                                   | -                                                  |
| SEU and Paediatric collections, 2020                                         | Jun 2020       | Residual sera from participating hospital laboratories | 72/1212 (5.9)                                                                    | -                                                  |
| Health Protection Surveillance Centre, 2020                                  | Jun 2020       | People living in two geographical areas in Ireland     | 33/1733 (1.9)                                                                    | -                                                  |
| Islamic Republic of Afghanistan Ministry of Public Health, Afghanistan, 2020 | Jul 2020       | General population                                     | 2997/9514 (31.5)                                                                 | -                                                  |

Abbreviations: ELISA, Enzyme-linked immunosorbent assay; CLIA: Chemiluminescent immunoassay; LFIA: lateral flow immunoassays; MIA: Microsphere immunoassay; MN, Microneutralisation assay; POC: point of care;  
 \* The sensitivity and specificity validated by the authors rather than manufactures.

**Table S5. Scoring system used for evaluation of published reports describing seroevidence of human infection with SARS-CoV-2**

|                   | Parameter                                  | Maximum score | Individual score                                                                                  |                                                                                                                                                        |                                                                          |                                                                                               |
|-------------------|--------------------------------------------|---------------|---------------------------------------------------------------------------------------------------|--------------------------------------------------------------------------------------------------------------------------------------------------------|--------------------------------------------------------------------------|-----------------------------------------------------------------------------------------------|
|                   |                                            |               | 0                                                                                                 | 1                                                                                                                                                      | 2                                                                        | 3                                                                                             |
| Study design      | Representativeness of samples              | 3             | Without reporting the method of recruitment of study participants or the selection of study sites | Convenience samples without randomly selecting study participants (e.g. archived specimens from clinical labs, or healthcare workers in single center) | Randomly-selected samples in communities or multiple healthcare settings | Multi-stage/stratified samples from communities or universal samples from healthcare settings |
| Laboratory method | Approval by National Regulatory Authority  | 1             | No                                                                                                | Yes                                                                                                                                                    | NA                                                                       | NA                                                                                            |
|                   | Validation prior to assay for surveillance | 2             | No                                                                                                | NA                                                                                                                                                     | Yes                                                                      | NA                                                                                            |
|                   | Confirmation methods                       | 2             | No                                                                                                | Second serological assay (except the VNT or pVNT)                                                                                                      | VNT or pVNT                                                              | NA                                                                                            |
| Outcomes          | Correction for age or sex*                 | 2             | No                                                                                                | NA                                                                                                                                                     | Yes                                                                      | NA                                                                                            |

|  |                                                                  |    |    |    |     |    |
|--|------------------------------------------------------------------|----|----|----|-----|----|
|  | Correction for testing performance (sensitivity and specificity) | 2  | No | NA | Yes | NA |
|  | Total                                                            | 12 | NA | NA | NA  | NA |

Note: VNT, Virus neutralization tests (such as the plaque-reduction neutralization test (PRNT) and microneutralization); pVNT, Pseudovirus neutralization tests;

\* Studies stratified their findings in separate age groups or sex will be assigned with 2 points.

**Table S6. Definition of subjects included in meta-analysis**

| Type of exposure                                                              | Population                  | Definition                                                                                                                                                                                                                                                                                                                                                                                                                                                                                                                                                                                                                                                                                  |
|-------------------------------------------------------------------------------|-----------------------------|---------------------------------------------------------------------------------------------------------------------------------------------------------------------------------------------------------------------------------------------------------------------------------------------------------------------------------------------------------------------------------------------------------------------------------------------------------------------------------------------------------------------------------------------------------------------------------------------------------------------------------------------------------------------------------------------|
| Exposed to laboratory-confirmed or suspected COVID-19 patients                | Close contact               | A person or a group of people who lived with or cared for a virologically-confirmed or suspected COVID-19 patients during the infectious period (e.g. household members, family contacts and relatives.), as well as other persons who worked with or had close contact with the virologically-confirmed or suspected COVID-19 patients during the infectious period (e.g. office co-workers, people sharing same waiting room, service member in the same aircraft carrier, patients in the same hemodialysis unit, and other potential social contacts). Specifically, clustering cases (excluding the patient) in the community or working place were also considered as close contacts. |
|                                                                               | High-risk healthcare worker | A group of persons who provided routine medical care for virologically-confirmed or suspected COVID-19 patients during the infectious period without wearing personal protective equipment (including protective suits, mask, gloves, goggles, face shields, and gowns).                                                                                                                                                                                                                                                                                                                                                                                                                    |
| Exposed to laboratory-confirmed /suspected/non COVID-19 patients              | Low-risk healthcare worker  | A group of persons who provided routine medical care for virologically-confirmed or suspected COVID-19 patients during the infectious period with the use of personal protective equipment (including protective suits, mask, gloves, goggles, face shields, and gowns), as well as those people who provided medical care for non-COVID-19 patients.                                                                                                                                                                                                                                                                                                                                       |
| Without known exposure to laboratory-confirmed or suspected COVID-19 patients | General population          | Persons without known exposure to laboratory-confirmed or suspected COVID-19 patients (e.g. community residents).                                                                                                                                                                                                                                                                                                                                                                                                                                                                                                                                                                           |



|                                                                               |                           |                                                                                                                                                                                                                                      |
|-------------------------------------------------------------------------------|---------------------------|--------------------------------------------------------------------------------------------------------------------------------------------------------------------------------------------------------------------------------------|
| Indeterminate exposure to laboratory-confirmed or suspected COVID-19 patients | Poorly-defined population | Persons with undefined or unknown exposure to laboratory-confirmed or suspected COVID-19 patients, as well as those participants cannot be categorized as the study populations mentioned above due to limited exposure information. |
|-------------------------------------------------------------------------------|---------------------------|--------------------------------------------------------------------------------------------------------------------------------------------------------------------------------------------------------------------------------------|

**Table S7. Quality assessment of serological studies**

| Reference               | Study characteristics                       |                               | Laboratory method |                            |                      | Outcome                                                   |                                 | Total | Grade |
|-------------------------|---------------------------------------------|-------------------------------|-------------------|----------------------------|----------------------|-----------------------------------------------------------|---------------------------------|-------|-------|
|                         | Study population                            | Representativeness of samples | Approval for NRA  | pre-experiment validations | Confirmation methods | Correction for age/sex or other socio-demographic factors | Correction for test performance |       |       |
| Peer-reviewed databases |                                             |                               |                   |                            |                      |                                                           |                                 |       |       |
| Victoria et al., 2020   | Close contacts, Low-risk healthcare workers | 1                             | 1                 | 2                          | 0                    | 0                                                         | 0                               | 4     | C     |
| To et al., 2020         | Poorly-defined population                   | 1                             | 0                 | 2                          | 2                    | 2                                                         | 0                               | 7     | B     |
| Hippich et al., 2020    | Poorly-defined population                   | 1                             | 1                 | 2                          | 1                    | 0                                                         | 0                               | 5     | C     |
| Liang et al., 2020      | Poorly-defined population                   | 2                             | 1                 | 0                          | 0                    | 2                                                         | 0                               | 5     | C     |
| Ng et al., 2020         | Close contacts                              | 3                             | 1                 | 0                          | 2                    | 0                                                         | 0                               | 6     | C     |
| Hallowell et al., 2020  | Close contacts, Poorly-defined population   | 1                             | 1                 | 0                          | 2                    | 0                                                         | 0                               | 4     | C     |
| Sam et al., 2020        | Poorly-defined population                   | 1                             | 1                 | 2                          | 2                    | 2                                                         | 0                               | 8     | B     |
| Jeong et al., 2020      | Poorly-defined population                   | 1                             | 1                 | 0                          | 0                    | 0                                                         | 0                               | 2     | D     |
| Buss et al., 2020       | Poorly-defined population                   | 1                             | 1                 | 2                          | 0                    | 2                                                         | 2                               | 8     | B     |
| Stadlbauer et al., 2020 | Poorly-defined population                   | 1                             | 1                 | 2                          | 1                    | 2                                                         | 0                               | 7     | B     |

|                            |                                                        |   |   |   |   |   |   |   |   |
|----------------------------|--------------------------------------------------------|---|---|---|---|---|---|---|---|
| Chen et al., 2020          | High-risk healthcare workers                           | 1 | 1 | 2 | 2 | 2 | 0 | 8 | B |
| Liu et al., 2020           | Poorly-defined population                              | 1 | 1 | 0 | 0 | 0 | 0 | 2 | D |
| Cavicchiolo et al., 2020   | Poorly-defined population                              | 1 | 1 | 0 | 0 | 0 | 0 | 2 | D |
| Plebani et al., 2020       | Poorly-defined population                              | 2 | 1 | 2 | 0 | 2 | 0 | 7 | B |
| Cox et al., 2020           | Close contacts                                         | 1 | 1 | 0 | 0 | 0 | 0 | 2 | D |
| Villalain et al., 2020     | Poorly-defined population                              | 1 | 1 | 0 | 0 | 0 | 0 | 2 | D |
| Brandstetter et al., 2020  | High-risk healthcare workers                           | 1 | 1 | 0 | 0 | 0 | 0 | 2 | D |
| Solodky et al., 2020       | Low-risk healthcare workers, Poorly-defined population | 1 | 0 | 0 | 0 | 0 | 0 | 1 | D |
| Zhang et al., 2020         | Poorly-defined population                              | 1 | 0 | 0 | 0 | 0 | 0 | 1 | D |
| Suda et al., 2020          | Poorly-defined population                              | 1 | 1 | 2 | 1 | 0 | 0 | 5 | C |
| Bogogiannidou et al., 2020 | Poorly-defined population                              | 1 | 1 | 2 | 1 | 2 | 2 | 9 | B |
| Xu et al., 2020            | Poorly-defined population                              | 2 | 1 | 2 | 0 | 2 | 0 | 7 | B |
| Vena et al., 2020          | Poorly-defined population                              | 1 | 1 | 2 | 0 | 2 | 0 | 6 | C |

|                           |                             |   |   |   |   |   |   |   |   |
|---------------------------|-----------------------------|---|---|---|---|---|---|---|---|
| Ng et al., 2020           | Poorly-defined population   | 1 | 1 | 2 | 2 | 0 | 0 | 6 | C |
| Venugopal et al., 2020    | Low-risk healthcare workers | 1 | 1 | 0 | 0 | 2 | 0 | 4 | C |
| Dingens et al., 2020      | Poorly-defined population   | 1 | 1 | 0 | 2 | 2 | 0 | 6 | C |
| Barzin et al., 2020       | Poorly-defined population   | 2 | 1 | 2 | 0 | 0 | 0 | 5 | C |
| Pérez-García et al., 2020 | Low-risk healthcare workers | 1 | 1 | 2 | 0 | 2 | 0 | 6 | C |
| Trieu et al., 2020        | Low-risk healthcare workers | 2 | 1 | 0 | 2 | 2 | 0 | 7 | B |
| Fischer et al., 2020      | Poorly-defined population   | 1 | 1 | 0 | 1 | 0 | 0 | 3 | D |
| McCafferty et al., 2020   | Poorly-defined population   | 1 | 1 | 0 | 0 | 0 | 0 | 2 | D |
| Brown et al., 2020        | Close contacts              | 1 | 1 | 0 | 0 | 0 | 0 | 2 | D |
| Han et al., 2020          | General population          | 1 | 1 | 0 | 0 | 0 | 0 | 2 | D |
| Zhou et al., 2020         | Low-risk healthcare workers | 1 | 1 | 0 | 0 | 2 | 0 | 4 | C |
| Thompson et al., 2020     | Poorly-defined population   | 1 | 1 | 2 | 2 | 0 | 0 | 6 | C |
| Carlo et al., 2020        | Poorly-defined population   | 1 | 1 | 0 | 0 | 0 | 0 | 2 | D |

|                        |                                                        |   |   |   |   |   |   |   |   |
|------------------------|--------------------------------------------------------|---|---|---|---|---|---|---|---|
| Tu et al., 2020        | Low-risk healthcare workers, Poorly-defined population | 1 | 1 | 0 | 1 | 0 | 0 | 3 | D |
| Kohler et al., 2020    | Low-risk healthcare workers                            | 2 | 1 | 0 | 1 | 2 | 0 | 6 | C |
| Fuereder et al., 2020  | Poorly-defined population                              | 1 | 1 | 0 | 1 | 0 | 0 | 3 | D |
| Fusco et al., 2020     | Low-risk healthcare workers                            | 1 | 1 | 0 | 0 | 2 | 0 | 4 | C |
| Havers et al., 2020    | Poorly-defined population                              | 1 | 1 | 0 | 1 | 2 | 2 | 7 | B |
| Xu et al., 2020        | Poorly-defined population                              | 1 | 1 | 0 | 1 | 0 | 0 | 3 | D |
| Behrens et al., 2020   | Low-risk healthcare workers                            | 1 | 1 | 0 | 2 | 0 | 0 | 4 | C |
| Loconsole et al., 2020 | Poorly-defined population                              | 1 | 1 | 0 | 0 | 0 | 0 | 2 | D |
| Mansour et al., 2020   | Low-risk healthcare workers                            | 1 | 1 | 0 | 0 | 2 | 0 | 4 | C |
| Gallian et al., 2020   | Poorly-defined population                              | 1 | 1 | 2 | 2 | 0 | 0 | 6 | C |
| Korth et al., 2020     | Low-risk healthcare workers                            | 1 | 1 | 0 | 0 | 0 | 0 | 2 | D |
| Bielecki et al., 2020  | Close contacts, Poorly-defined population              | 1 | 1 | 2 | 0 | 0 | 0 | 4 | C |
| Tsaneva et al., 2020   | Poorly-defined population                              | 1 | 1 | 0 | 0 | 2 | 0 | 4 | C |

|                                 |                                                                             |   |   |   |   |   |   |   |   |
|---------------------------------|-----------------------------------------------------------------------------|---|---|---|---|---|---|---|---|
| Houlihan et al., 2020           | Low-risk healthcare workers                                                 | 1 | 0 | 0 | 1 | 0 | 0 | 2 | D |
| Liu et al., 2020                | General population                                                          | 1 | 1 | 0 | 0 | 2 | 0 | 4 | C |
| Basteiro et al., 2020           | Low-risk healthcare workers                                                 | 2 | 1 | 2 | 0 | 2 | 0 | 7 | B |
| Isherwood et al., 2020          | Low-risk healthcare workers, Poorly-defined population                      | 1 | 1 | 0 | 0 | 2 | 0 | 4 | C |
| Xu et al., 2020                 | Low-risk healthcare workers , General population, Poorly-defined population | 1 | 1 | 2 | 0 | 0 | 0 | 4 | C |
| Milani et al., 2020             | Poorly-defined population                                                   | 1 | 1 | 0 | 0 | 0 | 0 | 2 | D |
| Medas et al., 2020              | Poorly-defined population                                                   | 1 | 1 | 0 | 0 | 0 | 0 | 2 | D |
| Vos et al., 2020                | General population                                                          | 3 | 1 | 0 | 0 | 2 | 2 | 8 | B |
| Savirón-Cornudella et al., 2020 | Poorly-defined population                                                   | 1 | 1 | 0 | 1 | 0 | 0 | 3 | D |
| Bryan et al., 2020              | General population                                                          | 1 | 1 | 2 | 0 | 2 | 0 | 6 | C |
| Hains et al., 2020              | Close contacts, Low-risk healthcare workers                                 | 1 | 1 | 0 | 1 | 2 | 0 | 5 | C |
| Liu et al., 2020                | Low-risk healthcare workers                                                 | 1 | 1 | 2 | 0 | 2 | 0 | 6 | C |

|                              |                              |   |   |   |   |   |   |   |   |
|------------------------------|------------------------------|---|---|---|---|---|---|---|---|
| Malickova et al., 2020       | Poorly-defined population    | 1 | 1 | 0 | 0 | 0 | 0 | 2 | D |
| Paulino-Ramirez et al., 2020 | General population           | 2 | 1 | 0 | 0 | 2 | 0 | 5 | C |
| Chirathaworn et al., 2020    | Close contacts               | 1 | 1 | 0 | 0 | 0 | 0 | 2 | D |
| Posfay-Barbe et al., 2020    | Poorly-defined population    | 1 | 1 | 0 | 1 | 0 | 0 | 3 | D |
| Slot et al., 2020            | Poorly-defined population    | 1 | 1 | 2 | 1 | 2 | 0 | 7 | B |
| Olayanju et al., 2020        | High-risk healthcare workers | 1 | 1 | 0 | 0 | 0 | 0 | 2 | D |
| Berte et al., 2020           | Poorly-defined population    | 2 | 1 | 2 | 0 | 2 | 0 | 7 | B |
| Ciechanowicz et al., 2020    | Poorly-defined population    | 1 | 1 | 0 | 0 | 2 | 0 | 4 | C |
| Ko et al., 2020              | Low-risk healthcare workers  | 2 | 1 | 2 | 2 | 2 | 0 | 9 | B |
| Lackermair et al., 2020      | Low-risk healthcare workers  | 1 | 1 | 0 | 0 | 0 | 0 | 2 | D |
| Sotgiu et al., 2020          | Poorly-defined population    | 1 | 1 | 0 | 0 | 2 | 0 | 4 | C |
| Mohanty et al., 2020         | Poorly-defined population    | 1 | 1 | 2 | 0 | 0 | 0 | 4 | C |
| Wu et al., 2020              | Poorly-defined population    | 1 | 1 | 0 | 0 | 0 | 0 | 2 | D |



|                           |                                                        |   |   |   |   |   |   |    |   |
|---------------------------|--------------------------------------------------------|---|---|---|---|---|---|----|---|
| Stubblefield et al., 2020 | Low-risk healthcare workers                            | 1 | 1 | 0 | 0 | 2 | 0 | 4  | C |
| Self et al., 2020         | Low-risk healthcare workers                            | 2 | 1 | 2 | 0 | 2 | 0 | 7  | B |
| Stellato et al., 2020     | Low-risk healthcare workers, Poorly-defined population | 1 | 1 | 0 | 0 | 0 | 0 | 2  | D |
| Flannery et al., 2020     | Poorly-defined population                              | 1 | 1 | 2 | 0 | 0 | 0 | 4  | C |
| Stock et al., 2020        | Low-risk healthcare workers                            | 1 | 1 | 0 | 0 | 2 | 0 | 4  | C |
| Goldberg et al., 2020     | Poorly-defined population                              | 1 | 1 | 0 | 0 | 0 | 0 | 2  | D |
| Stringhini et al., 2020   | General population                                     | 3 | 1 | 2 | 1 | 2 | 2 | 11 | A |
| Erikstrup et al., 2020    | Poorly-defined population                              | 1 | 1 | 2 | 0 | 2 | 2 | 8  | B |
| Lahner et al., 2020       | Low-risk healthcare workers                            | 1 | 1 | 2 | 0 | 0 | 0 | 4  | C |
| Labriola et al., 2020     | Poorly-defined population                              | 1 | 1 | 0 | 1 | 0 | 0 | 3  | D |
| Pallett et al., 2020      | Poorly-defined population                              | 2 | 1 | 2 | 1 | 0 | 0 | 6  | C |
| Sood et al., 2020         | General population                                     | 3 | 1 | 2 | 0 | 2 | 2 | 10 | A |
| Shakiba et al., 2020      | General population                                     | 3 | 1 | 0 | 0 | 2 | 2 | 8  | B |

|                              |                                               |   |   |   |   |   |   |   |   |
|------------------------------|-----------------------------------------------|---|---|---|---|---|---|---|---|
| Madsen T et al., 2020        | Low-risk healthcare workers                   | 1 | 1 | 2 | 0 | 0 | 0 | 4 | C |
| Sims et al., 2020            | Low-risk healthcare workers                   | 2 | 1 | 0 | 0 | 2 | 2 | 7 | B |
| Crovetto et al., 2020        | Poorly-defined population                     | 0 | 1 | 0 | 1 | 0 | 0 | 2 | D |
| Gudbjartsson et al., 2020    | General population, Poorly-defined population | 2 | 1 | 2 | 1 | 2 | 0 | 8 | B |
| Naranbhai et al., 2020       | General population                            | 1 | 1 | 2 | 0 | 2 | 2 | 8 | B |
| Herzberg et al., 2020        | Low-risk healthcare workers                   | 2 | 1 | 0 | 1 | 0 | 0 | 4 | C |
| Dacosta-Urbieta et al., 2020 | Low-risk healthcare workers                   | 2 | 0 | 0 | 0 | 0 | 0 | 2 | D |
| Lumley et al., 2020          | Poorly-defined population                     | 1 | 1 | 0 | 2 | 0 | 0 | 4 | C |
| Rudberg et al., 2020         | Low-risk healthcare workers                   | 1 | 1 | 2 | 0 | 2 | 0 | 6 | C |
| Buntinx et al., 2020         | Poorly-defined population                     | 1 | 1 | 0 | 0 | 0 | 0 | 2 | D |
| Martin et al., 2020          | Low-risk healthcare workers                   | 1 | 1 | 0 | 0 | 2 | 0 | 4 | C |
| Amendola et al., 2020        | Low-risk healthcare workers                   | 1 | 1 | 0 | 0 | 2 | 0 | 4 | C |

|                              |                                                        |   |   |   |   |   |   |    |   |
|------------------------------|--------------------------------------------------------|---|---|---|---|---|---|----|---|
| Iversen et al., 2020         | Low-risk healthcare workers, Poorly-defined population | 3 | 1 | 2 | 0 | 2 | 2 | 10 | A |
| Olalla et al., 2020          | Low-risk healthcare workers                            | 1 | 1 | 0 | 0 | 0 | 0 | 2  | D |
| Cosma et al., 2020           | Poorly-defined population                              | 1 | 1 | 0 | 1 | 0 | 0 | 3  | D |
| Caban-Martinez et al., 2020  | Poorly-defined population                              | 1 | 1 | 0 | 0 | 2 | 0 | 4  | C |
| Poletti et al., 2020         | Close contacts                                         | 1 | 1 | 0 | 0 | 2 | 0 | 4  | C |
| Waterfield et al., 2020      | Poorly-defined population                              | 2 | 1 | 0 | 1 | 2 | 0 | 6  | C |
| Racine-Brzostek et al., 2020 | Poorly-defined population                              | 1 | 1 | 0 | 0 | 2 | 0 | 4  | C |
| Calcagno et al., 2020        | Poorly-defined population                              | 2 | 1 | 0 | 0 | 2 | 0 | 5  | C |
| Poustchi et al., 2020        | General population, Poorly-defined population          | 3 | 1 | 2 | 0 | 2 | 2 | 10 | A |
| Cito et al., 2020            | General population                                     | 3 | 1 | 0 | 0 | 2 | 0 | 6  | C |
| Rosenberg et al., 2020       | General population                                     | 1 | 1 | 2 | 0 | 2 | 2 | 8  | B |
| Daniel et al., 2020          | Close contacts                                         | 1 | 1 | 0 | 2 | 0 | 0 | 4  | C |

|                         |                                               |   |   |   |   |   |   |   |   |
|-------------------------|-----------------------------------------------|---|---|---|---|---|---|---|---|
| Schmidt et al., 2020    | Low-risk healthcare workers                   | 1 | 1 | 0 | 0 | 2 | 0 | 4 | C |
| Moscola et al., 2020    | Low-risk healthcare workers                   | 3 | 1 | 2 | 0 | 2 | 0 | 8 | B |
| Tarabichi et al., 2020  | Poorly-defined population                     | 1 | 1 | 0 | 0 | 0 | 0 | 2 | D |
| Rosser et al., 2020     | Low-risk healthcare workers                   | 1 | 1 | 0 | 0 | 2 | 0 | 4 | C |
| Armin et al., 2020      | Low-risk healthcare workers                   | 1 | 1 | 0 | 0 | 2 | 0 | 4 | C |
| Montenegro et al., 2020 | General population, Poorly-defined population | 2 | 1 | 0 | 1 | 2 | 0 | 6 | C |
| Kaufman et al., 2020    | Poorly-defined population                     | 1 | 1 | 0 | 0 | 0 | 0 | 2 | D |
| Ahmad et al., 2020      | Poorly-defined population                     | 1 | 1 | 0 | 0 | 0 | 0 | 2 | D |
| Steensels et al., 2020  | Low-risk healthcare workers                   | 1 | 1 | 2 | 0 | 0 | 0 | 4 | C |
| Mostafa et al., 2020    | Low-risk healthcare workers                   | 2 | 1 | 0 | 0 | 0 | 0 | 3 | D |
| Kantele et al., 2020    | Low-risk healthcare workers                   | 1 | 1 | 0 | 2 | 2 | 0 | 6 | C |
| Soriano et al., 2020    | Close contacts, Poorly-defined population     | 1 | 1 | 0 | 0 | 0 | 0 | 2 | D |
| Eyre et al., 2020       | Low-risk healthcare workers                   | 2 | 1 | 0 | 1 | 0 | 0 | 4 | C |

|                             |                                                        |   |   |   |   |   |   |   |   |
|-----------------------------|--------------------------------------------------------|---|---|---|---|---|---|---|---|
| Halatoko et al., 2020       | Low-risk healthcare workers, Poorly-defined population | 2 | 1 | 0 | 0 | 0 | 0 | 3 | D |
| Shields et al., 2020        | Low-risk healthcare workers                            | 1 | 0 | 0 | 0 | 2 | 0 | 3 | D |
| Makaronidis et al., 2020    | Poorly-defined population                              | 2 | 1 | 0 | 0 | 2 | 0 | 5 | C |
| Guerrero et al., 2020       | General population                                     | 2 | 1 | 0 | 0 | 2 | 0 | 5 | C |
| Menachemi et al., 2020      | General population                                     | 3 | 0 | 0 | 0 | 2 | 0 | 5 | C |
| Vilibic-Cavlek et al., 2020 | Poorly-defined population                              | 1 | 1 | 0 | 2 | 0 | 0 | 4 | C |
| Pollán et al., 2020         | General population                                     | 3 | 1 | 2 | 1 | 2 | 0 | 9 | B |
| Petersen et al., 2020       | General population                                     | 2 | 1 | 0 | 0 | 2 | 2 | 7 | B |
| Bajema et al., 2020         | Poorly-defined population                              | 1 | 1 | 0 | 0 | 2 | 2 | 6 | C |
| Biggs et al., 2020          | General population                                     | 3 | 1 | 2 | 0 | 2 | 0 | 8 | B |
| Sydney et al., 2020         | Poorly-defined population                              | 1 | 1 | 0 | 0 | 0 | 0 | 2 | D |
| Brotons et al., 2020        | Close contacts                                         | 2 | 1 | 2 | 0 | 2 | 0 | 7 | B |
| Hunter et al., 2020         | Low-risk healthcare workers                            | 2 | 1 | 0 | 0 | 2 | 0 | 5 | C |

|                         |                             |   |   |   |   |   |   |   |   |
|-------------------------|-----------------------------|---|---|---|---|---|---|---|---|
| Tilley et al., 2020     | Poorly-defined population   | 2 | 1 | 0 | 0 | 2 | 2 | 7 | B |
| Tsatsaris et al., 2020  | Poorly-defined population   | 1 | 1 | 0 | 0 | 2 | 0 | 4 | C |
| Uyoga et al., 2020      | Poorly-defined population   | 1 | 1 | 2 | 0 | 2 | 2 | 8 | B |
| Josè et al., 2020       | Poorly-defined population   | 1 | 1 | 0 | 0 | 2 | 0 | 4 | C |
| Paderno et al., 2020    | Low-risk healthcare workers | 1 | 1 | 0 | 0 | 0 | 0 | 2 | D |
| Merkely et al., 2020    | General population          | 3 | 1 | 0 | 0 | 2 | 0 | 6 | C |
| Addetia et al., 2020    | Poorly-defined population   | 1 | 1 | 0 | 2 | 0 | 0 | 4 | C |
| Ladhani et al., 2020    | Close contacts              | 1 | 1 | 0 | 0 | 2 | 0 | 4 | C |
| Nailescu et al., 2020   | Poorly-defined population   | 1 | 1 | 0 | 1 | 2 | 0 | 5 | C |
| Sperotto et al., 2020   | Poorly-defined population   | 1 | 1 | 0 | 1 | 0 | 0 | 3 | D |
| Mack et al., 2020       | Poorly-defined population   | 1 | 1 | 0 | 2 | 0 | 0 | 4 | C |
| Belingheri et al., 2020 | Poorly-defined population   | 1 | 1 | 0 | 0 | 2 | 0 | 4 | C |
| Lastrucci et al., 2020  | Poorly-defined population   | 1 | 1 | 0 | 0 | 0 | 0 | 2 | D |

|                          |                                             |   |   |   |   |   |   |   |   |
|--------------------------|---------------------------------------------|---|---|---|---|---|---|---|---|
| Dioscoridi et al., 2020  | Close contacts, Low-risk healthcare workers | 1 | 1 | 0 | 1 | 0 | 0 | 3 | D |
| Péré et al., 2020        | Poorly-defined population                   | 1 | 1 | 2 | 1 | 0 | 0 | 5 | C |
| Borges et al., 2020      | General population                          | 1 | 1 | 2 | 0 | 2 | 2 | 8 | B |
| Torres et al., 2020      | Close contacts                              | 2 | 1 | 0 | 0 | 2 | 0 | 5 | C |
| Poulikakos et al., 2020  | Low-risk healthcare workers                 | 1 | 1 | 0 | 0 | 0 | 0 | 2 | D |
| Veerus et al., 2020      | Poorly-defined population                   | 1 | 1 | 0 | 0 | 0 | 0 | 2 | D |
| Brunner et al., 2020     | Poorly-defined population                   | 1 | 1 | 0 | 0 | 2 | 0 | 4 | C |
| Vijh et al., 2020        | Poorly-defined population                   | 1 | 1 | 0 | 0 | 2 | 0 | 4 | C |
| Rashid-Abdi et al., 2020 | Low-risk healthcare workers                 | 1 | 1 | 0 | 0 | 2 | 0 | 4 | C |
| Stefanelli et al., 2020  | General population                          | 1 | 1 | 0 | 0 | 2 | 2 | 6 | C |
| Feehan et al., 2020      | General population                          | 3 | 1 | 0 | 0 | 2 | 0 | 6 | C |
| Sutton et al., 2020      | Poorly-defined population                   | 1 | 1 | 0 | 0 | 2 | 0 | 4 | C |
| Bampoe et al., 2020      | High-risk healthcare workers                | 2 | 1 | 0 | 0 | 0 | 0 | 3 | D |

|                       |                             |   |   |   |   |   |   |    |   |
|-----------------------|-----------------------------|---|---|---|---|---|---|----|---|
| Cento et al., 2020    | Poorly-defined population   | 1 | 1 | 0 | 1 | 2 | 0 | 5  | C |
| Rivas et al., 2020    | Poorly-defined population   | 2 | 1 | 0 | 0 | 0 | 0 | 3  | D |
| Capasso et al., 2020  | Poorly-defined population   | 1 | 0 | 0 | 0 | 2 | 0 | 3  | D |
| Murhekar et al., 2020 | General population          | 3 | 1 | 2 | 1 | 2 | 2 | 11 | A |
| Tong et al., 2020     | Low-risk healthcare workers | 1 | 1 | 0 | 0 | 2 | 0 | 4  | C |
| Iwuji et al., 2020    | Poorly-defined population   | 1 | 1 | 0 | 0 | 0 | 0 | 2  | D |
| Mughal et al., 2020   | Low-risk healthcare workers | 1 | 1 | 0 | 0 | 0 | 0 | 2  | D |
| Hallal et al., 2020   | General population          | 3 | 1 | 2 | 0 | 2 | 2 | 10 | A |
| Delmas et al., 2020   | Low-risk healthcare workers | 1 | 1 | 0 | 0 | 0 | 0 | 2  | D |
| Costa et al., 2020    | Low-risk healthcare workers | 1 | 1 | 0 | 0 | 2 | 0 | 4  | C |
| Zhang et al., 2020    | Close contacts              | 2 | 1 | 0 | 0 | 0 | 0 | 3  | D |
| Pan et al., 2020      | General population          | 2 | 1 | 0 | 0 | 2 | 0 | 5  | C |
| Akinbami et al., 2020 | Poorly-defined population   | 1 | 1 | 0 | 0 | 2 | 0 | 4  | C |



|                              |                                                        |   |   |   |   |   |   |   |   |
|------------------------------|--------------------------------------------------------|---|---|---|---|---|---|---|---|
| Kempen et al., 2020          | General population                                     | 1 | 1 | 0 | 0 | 2 | 0 | 4 | C |
| Pagani et al., 2020          | General population                                     | 2 | 1 | 0 | 0 | 2 | 0 | 5 | C |
| Jespersen et al., 2020       | Poorly-defined population                              | 2 | 1 | 0 | 0 | 2 | 2 | 7 | B |
| Ladhani et al., 2020         | Poorly-defined population                              | 2 | 1 | 0 | 2 | 0 | 0 | 5 | C |
| Yogo et al., 2020            | Low-risk healthcare workers                            | 2 | 1 | 0 | 0 | 2 | 0 | 5 | C |
| Santos-Hövenner et al., 2020 | General population                                     | 2 | 1 | 0 | 2 | 2 | 2 | 9 | B |
| Alserehi et al., 2020        | Low-risk healthcare workers, Poorly-defined population | 2 | 1 | 0 | 2 | 0 | 0 | 5 | C |
| Alali et al., 2020           | Poorly-defined population                              | 3 | 1 | 0 | 0 | 2 | 0 | 6 | C |
| Del Brutto et al., 2020      | General population                                     | 3 | 1 | 0 | 0 | 2 | 0 | 6 | C |
| Blairon et al., 2020         | Poorly-defined population                              | 2 | 1 | 2 | 1 | 0 | 0 | 6 | C |
| Noh et al., 2020             | Poorly-defined population                              | 1 | 0 | 0 | 2 | 0 | 0 | 3 | D |
| Ho et al., 2020              | Poorly-defined population                              | 1 | 1 | 2 | 1 | 2 | 0 | 7 | B |
| Murakami et al., 2020        | Low-risk healthcare workers                            | 1 | 1 | 0 | 1 | 2 | 0 | 5 | C |

|                            |                             |   |   |   |   |   |   |   |   |
|----------------------------|-----------------------------|---|---|---|---|---|---|---|---|
| Lidström et al., 2020      | Low-risk healthcare workers | 3 | 1 | 0 | 0 | 2 | 0 | 6 | C |
| Haizler-Cohen et al., 2020 | Poorly-defined population   | 2 | 1 | 0 | 0 | 0 | 0 | 3 | D |
| Martin et al., 2020        | Low-risk healthcare workers | 1 | 1 | 0 | 0 | 2 | 0 | 4 | C |
| Black et al., 2020         | Low-risk healthcare workers | 1 | 1 | 0 | 0 | 0 | 0 | 2 | D |
| Kassem et al., 2020        | Low-risk healthcare workers | 1 | 0 | 0 | 0 | 0 | 0 | 1 | D |
| Hibino et al., 2020        | Low-risk healthcare workers | 1 | 1 | 2 | 0 | 2 | 0 | 6 | C |
| Predecki et al., 2020      | Poorly-defined population   | 1 | 1 | 2 | 1 | 0 | 0 | 5 | C |
| Nsn et al., 2020           | Poorly-defined population   | 1 | 1 | 0 | 0 | 0 | 0 | 2 | D |
| Abdelmoniem et al., 2020   | Low-risk healthcare workers | 1 | 1 | 0 | 0 | 0 | 0 | 2 | D |
| Pedersen et al., 2020      | Poorly-defined population   | 1 | 1 | 2 | 0 | 0 | 2 | 6 | C |
| Dimcheff et al., 2020      | Low-risk healthcare workers | 1 | 1 | 0 | 0 | 2 | 0 | 4 | C |
| Mesnil et al., 2020        | Low-risk healthcare workers | 1 | 1 | 0 | 0 | 0 | 0 | 2 | D |
| Insúa et al., 2020         | Low-risk healthcare workers | 1 | 1 | 0 | 0 | 0 | 0 | 2 | D |

|                           |                             |   |   |   |   |   |   |   |   |
|---------------------------|-----------------------------|---|---|---|---|---|---|---|---|
| Dimeglio et al., 2020     | Poorly-defined population   | 2 | 1 | 0 | 2 | 2 | 0 | 7 | B |
| Mahajan et al., 2020      | General population          | 2 | 1 | 2 | 1 | 2 | 0 | 8 | B |
| Dodd et al., 2020         | Poorly-defined population   | 1 | 1 | 0 | 0 | 2 | 0 | 4 | C |
| Martínez-Baz et al., 2020 | Poorly-defined population   | 2 | 1 | 0 | 0 | 2 | 0 | 5 | C |
| Anand et al., 2020        | Poorly-defined population   | 2 | 1 | 0 | 0 | 2 | 2 | 7 | B |
| Lundkvist et al., 2020    | General population          | 2 | 1 | 2 | 0 | 0 | 0 | 5 | C |
| Younas et al., 2020       | Poorly-defined population   | 1 | 1 | 2 | 1 | 0 | 0 | 5 | C |
| Gujski et al., 2020       | Poorly-defined population   | 2 | 1 | 0 | 0 | 2 | 0 | 5 | C |
| Malani et al., 2020       | General population          | 3 | 1 | 0 | 0 | 2 | 2 | 8 | B |
| Khan et al., 2020         | Poorly-defined population   | 1 | 1 | 0 | 0 | 2 | 2 | 6 | C |
| Pray et al., 2020         | Close contacts              | 1 | 1 | 0 | 0 | 0 | 0 | 2 | D |
| Bloomfield et al., 2020   | Poorly-defined population   | 1 | 1 | 0 | 1 | 2 | 2 | 7 | B |
| Kumar et al., 2020        | Low-risk healthcare workers | 1 | 1 | 0 | 1 | 0 | 0 | 3 | D |

|                             |                              |   |   |   |   |   |   |   |   |
|-----------------------------|------------------------------|---|---|---|---|---|---|---|---|
| Noor et al., 2020           | High-risk healthcare workers | 2 | 1 | 0 | 0 | 2 | 0 | 5 | C |
| Yamaki et al., 2020         | Poorly-defined population    | 1 | 1 | 0 | 0 | 2 | 0 | 4 | C |
| Bajema et al., 2020         | Poorly-defined population    | 1 | 1 | 0 | 0 | 2 | 0 | 4 | C |
| Godbout et al., 2020        | Low-risk healthcare workers  | 1 | 1 | 0 | 0 | 2 | 0 | 4 | C |
| Silva et al., 2020          | General population           | 3 | 1 | 0 | 0 | 2 | 0 | 6 | C |
| Kumar et al., 2020          | Poorly-defined population    | 1 | 1 | 0 | 0 | 2 | 0 | 4 | C |
| Chau et al., 2020           | Low-risk healthcare workers  | 1 | 1 | 0 | 0 | 2 | 0 | 4 | C |
| Preprint servers            |                              |   |   |   |   |   |   |   |   |
| Sughayer et al., 2020       | Poorly-defined population    | 1 | 1 | 0 | 0 | 0 | 0 | 2 | D |
| Germain et al., 2020        | Poorly-defined population    | 1 | 1 | 0 | 1 | 0 | 0 | 3 | D |
| Martinez-Acuña et al., 2020 | Poorly-defined population    | 1 | 1 | 0 | 0 | 2 | 0 | 4 | C |
| McCulloch et al., 2020      | Poorly-defined population    | 1 | 1 | 0 | 0 | 0 | 0 | 2 | D |
| Chang et al., 2020          | Poorly-defined population    | 1 | 1 | 0 | 2 | 2 | 0 | 6 | C |
| Li et al., 2020             | Poorly-defined population    | 1 | 1 | 0 | 0 | 0 | 0 | 2 | D |

|                         |                                                                             |   |   |   |   |   |   |    |   |
|-------------------------|-----------------------------------------------------------------------------|---|---|---|---|---|---|----|---|
| Xiong et al., 2020      | Low-risk healthcare workers                                                 | 0 | 0 | 0 | 0 | 0 | 0 | 0  | D |
| Valenti et al., 2020    | Poorly-defined population                                                   | 1 | 1 | 2 | 0 | 2 | 2 | 8  | B |
| Yu et al., 2020         | Low-risk healthcare workers                                                 | 1 | 1 | 0 | 0 | 0 | 0 | 2  | D |
| Kuwelker et al., 2020   | Close contacts                                                              | 1 | 1 | 0 | 2 | 2 | 0 | 6  | C |
| Liu et al., 2020        | High-risk healthcare workers, General population, Poorly-defined population | 1 | 1 | 0 | 0 | 2 | 0 | 4  | C |
| Kamath et al., 2020     | Poorly-defined population                                                   | 1 | 1 | 2 | 1 | 0 | 0 | 5  | C |
| Santana et al., 2020    | Poorly-defined population                                                   | 1 | 1 | 0 | 0 | 2 | 0 | 4  | C |
| Tubiana et al., 2020    | High-risk healthcare workers                                                | 2 | 1 | 0 | 1 | 2 | 0 | 6  | C |
| Skowronski et al., 2020 | Poorly-defined population                                                   | 1 | 1 | 0 | 2 | 2 | 2 | 8  | B |
| Vu et al., 2020         | Poorly-defined population                                                   | 1 | 1 | 2 | 2 | 2 | 2 | 10 | A |
| Dietrich et al., 2020   | Poorly-defined population                                                   | 1 | 1 | 2 | 0 | 2 | 0 | 6  | C |
| Brehm et al., 2020      | Low-risk healthcare workers                                                 | 1 | 1 | 2 | 0 | 0 | 0 | 4  | C |

|                       |                                                        |   |   |   |   |   |   |   |   |
|-----------------------|--------------------------------------------------------|---|---|---|---|---|---|---|---|
| Tang et al., 2020     | Poorly-defined population                              | 1 | 1 | 0 | 0 | 2 | 0 | 4 | C |
| Augusto et al., 2020  | Low-risk healthcare workers                            | 2 | 1 | 0 | 0 | 0 | 0 | 3 | D |
| Wang et al., 2020     | Low-risk healthcare workers                            | 1 | 1 | 0 | 0 | 2 | 0 | 4 | C |
| Ling et al., 2020     | General population                                     | 1 | 1 | 2 | 0 | 2 | 2 | 8 | B |
| Paradiso et al., 2020 | Poorly-defined population                              | 1 | 1 | 0 | 1 | 0 | 0 | 3 | D |
| Herzog et al., 2020   | Poorly-defined population                              | 1 | 1 | 0 | 0 | 2 | 0 | 4 | C |
| Dopico et al., 2020   | Poorly-defined population                              | 1 | 0 | 2 | 0 | 0 | 0 | 3 | D |
| Streeck et al., 2020  | General population                                     | 2 | 1 | 2 | 2 | 0 | 2 | 9 | B |
| Doi et al., 2020      | Poorly-defined population                              | 1 | 0 | 0 | 0 | 2 | 0 | 3 | D |
| Tosato et al., 2020   | Low-risk healthcare workers                            | 1 | 1 | 0 | 0 | 0 | 0 | 2 | D |
| Carozzi et al., 2020  | Low-risk healthcare workers                            | 2 | 1 | 2 | 1 | 0 | 0 | 6 | C |
| Siddiqui et al., 2020 | Low-risk healthcare workers, Poorly-defined population | 1 | 1 | 0 | 0 | 2 | 0 | 4 | C |
| Davis et al., 2020    | Poorly-defined population                              | 1 | 1 | 0 | 0 | 2 | 0 | 4 | C |

|                         |                                                        |   |   |   |   |   |   |    |   |
|-------------------------|--------------------------------------------------------|---|---|---|---|---|---|----|---|
| Kammon et al., 2020     | Low-risk healthcare workers, General population        | 2 | 1 | 0 | 0 | 2 | 0 | 5  | C |
| Wagner et al., 2020     | Poorly-defined population                              | 1 | 1 | 0 | 2 | 2 | 0 | 6  | C |
| Bendavid et al., 2020   | General population                                     | 1 | 1 | 2 | 0 | 2 | 2 | 8  | B |
| Egerup et al., 2020     | Poorly-defined population                              | 1 | 1 | 0 | 0 | 2 | 2 | 6  | C |
| Krähling et al., 2020   | Poorly-defined population                              | 1 | 0 | 2 | 2 | 0 | 0 | 5  | C |
| Richard et al., 2020    | General population                                     | 3 | 1 | 2 | 1 | 2 | 2 | 11 | A |
| Nopsopon et al., 2020   | Low-risk healthcare workers, Poorly-defined population | 3 | 1 | 2 | 0 | 2 | 0 | 8  | B |
| Leidner et al., 2020    | Low-risk healthcare workers                            | 2 | 1 | 2 | 0 | 0 | 0 | 5  | C |
| Halbrook et al., 2020   | Low-risk healthcare workers, Poorly-defined population | 2 | 1 | 0 | 0 | 2 | 0 | 5  | C |
| Fujita et al., 2020     | Low-risk healthcare workers                            | 1 | 1 | 0 | 0 | 0 | 0 | 2  | D |
| Bal et al., 2020        | Poorly-defined population                              | 1 | 1 | 0 | 1 | 0 | 0 | 3  | D |
| Psichogiou et al., 2020 | Low-risk healthcare workers                            | 1 | 0 | 2 | 0 | 2 | 0 | 5  | C |

|                        |                                             |   |   |   |   |   |   |    |   |
|------------------------|---------------------------------------------|---|---|---|---|---|---|----|---|
| Thomas et al., 2020    | Close contacts, Low-risk healthcare workers | 2 | 0 | 2 | 0 | 0 | 0 | 4  | C |
| Woon et al., 2020      | Low-risk healthcare workers                 | 2 | 1 | 2 | 0 | 2 | 0 | 7  | B |
| Cohen et al., 2020     | Close contacts, Poorly-defined population   | 2 | 1 | 0 | 0 | 0 | 0 | 3  | D |
| Sikora et al., 2020    | Poorly-defined population                   | 1 | 1 | 0 | 0 | 0 | 0 | 2  | D |
| Galán et al., 2020     | High-risk healthcare workers                | 1 | 1 | 0 | 0 | 2 | 0 | 4  | C |
| Garralda et al., 2020  | Low-risk healthcare workers                 | 1 | 1 | 0 | 0 | 2 | 0 | 4  | C |
| Erber et al., 2020     | Low-risk healthcare workers                 | 2 | 1 | 0 | 1 | 2 | 0 | 6  | C |
| Garritsen et al., 2020 | Poorly-defined population                   | 1 | 1 | 2 | 1 | 0 | 0 | 5  | C |
| Snoeck et al., 2020    | General population                          | 3 | 1 | 2 | 0 | 2 | 0 | 8  | B |
| Comar et al., 2020     | Low-risk healthcare workers                 | 1 | 1 | 2 | 0 | 0 | 0 | 4  | C |
| Nisar et al., 2020     | General population                          | 2 | 1 | 2 | 0 | 2 | 0 | 7  | B |
| Wang et al., 2020      | General population                          | 3 | 1 | 2 | 2 | 2 | 0 | 10 | A |
| Lisandru et al., 2020  | Poorly-defined population                   | 1 | 1 | 0 | 2 | 2 | 0 | 6  | C |



|                         |                                                 |   |   |   |   |   |   |   |   |
|-------------------------|-------------------------------------------------|---|---|---|---|---|---|---|---|
| Zou et al., 2020        | General population                              | 1 | 1 | 0 | 0 | 0 | 0 | 2 | D |
| Nopsopon et al., 2020   | Low-risk healthcare workers                     | 1 | 1 | 2 | 0 | 2 | 0 | 6 | C |
| McDade et al., 2020     | Poorly-defined population                       | 0 | 1 | 2 | 0 | 0 | 0 | 3 | D |
| Baker et al., 2020      | Low-risk healthcare workers                     | 2 | 1 | 0 | 0 | 2 | 0 | 5 | C |
| Appa et al., 2020       | General population                              | 3 | 1 | 2 | 1 | 0 | 2 | 9 | B |
| Baxendale et al., 2020  | Low-risk healthcare workers                     | 1 | 1 | 2 | 0 | 2 | 0 | 6 | C |
| Elli et al., 2020       | Poorly-defined population                       | 1 | 1 | 0 | 0 | 2 | 0 | 4 | C |
| Takita et al., 2020     | General population                              | 1 | 0 | 2 | 0 | 2 | 0 | 5 | C |
| Tönshoff et al., 2020   | General population                              | 1 | 1 | 0 | 2 | 2 | 0 | 6 | C |
| Mortgat et al., 2020    | Low-risk healthcare workers                     | 3 | 1 | 0 | 0 | 2 | 0 | 6 | C |
| Jerković et al., 2020   | Poorly-defined population                       | 1 | 1 | 0 | 0 | 2 | 0 | 4 | C |
| Alessandro et al., 2020 | Low-risk healthcare workers, General population | 2 | 1 | 0 | 0 | 2 | 0 | 5 | C |
| Dillner et al., 2020    | Poorly-defined population                       | 2 | 1 | 2 | 0 | 2 | 0 | 7 | B |

|                             |                                                        |   |   |   |   |   |   |   |   |
|-----------------------------|--------------------------------------------------------|---|---|---|---|---|---|---|---|
| Alemu et al., 2020          | General population                                     | 2 | 1 | 0 | 0 | 2 | 2 | 7 | B |
| Aziz et al., 2020           | General population                                     | 3 | 0 | 0 | 2 | 0 | 0 | 5 | C |
| Chamie et al., 2020         | General population                                     | 1 | 1 | 0 | 0 | 2 | 2 | 6 | C |
| Nesbitt et al., 2020        | Poorly-defined population                              | 1 | 1 | 0 | 1 | 2 | 0 | 5 | C |
| Wells et al., 2020          | General population                                     | 1 | 1 | 2 | 1 | 0 | 0 | 5 | C |
| Fontanet et al., 2020       | Poorly-defined population                              | 1 | 1 | 0 | 0 | 2 | 0 | 4 | C |
| Anna et al., 2020           | Poorly-defined population                              | 1 | 1 | 2 | 2 | 2 | 0 | 8 | B |
| Sandri et al., 2020         | Low-risk healthcare workers                            | 1 | 1 | 0 | 0 | 2 | 0 | 4 | C |
| Calife et al., 2020         | General population                                     | 3 | 1 | 0 | 0 | 0 | 0 | 4 | C |
| Brant et al., 2020          | Low-risk healthcare workers                            | 1 | 1 | 0 | 0 | 2 | 2 | 6 | C |
| Brant-Zawadzki et al., 2020 | Low-risk healthcare workers, Poorly-defined population | 2 | 1 | 2 | 0 | 2 | 0 | 7 | B |
| Jones et al., 2020          | Low-risk healthcare workers                            | 2 | 1 | 0 | 0 | 2 | 0 | 5 | C |
| Li et al., 2020             | Poorly-defined population                              | 1 | 1 | 0 | 0 | 0 | 0 | 2 | D |

|                            |                             |   |   |   |   |   |   |    |   |
|----------------------------|-----------------------------|---|---|---|---|---|---|----|---|
| Barallat et al., 2020      | Low-risk healthcare workers | 1 | 1 | 0 | 1 | 2 | 0 | 5  | C |
| Tess et al., 2020          | General population          | 2 | 1 | 2 | 0 | 2 | 0 | 7  | B |
| Mattern et al., 2020       | Poorly-defined population   | 1 | 1 | 0 | 0 | 0 | 0 | 2  | D |
| Carrat et al., 2020        | General population          | 2 | 1 | 0 | 2 | 2 | 0 | 7  | B |
| Samore et al., 2020        | General population          | 3 | 1 | 2 | 0 | 2 | 2 | 10 | A |
| Dupraz et al., 2020        | Close contacts              | 1 | 1 | 2 | 0 | 2 | 0 | 6  | C |
| Royo-Cebrecos et al., 2020 | General population          | 1 | 1 | 2 | 0 | 2 | 0 | 6  | C |
| McLaughlin et al., 2020    | General population          | 3 | 1 | 0 | 0 | 2 | 2 | 8  | B |
| Rauber et al., 2020        | Poorly-defined population   | 1 | 1 | 0 | 0 | 2 | 0 | 4  | C |
| McBride et al., 2020       | Poorly-defined population   | 1 | 1 | 0 | 0 | 0 | 0 | 2  | D |
| Jögi et al., 2020          | Poorly-defined population   | 2 | 1 | 0 | 2 | 2 | 0 | 7  | B |
| Ebinger et al., 2020       | Poorly-defined population   | 2 | 1 | 0 | 0 | 2 | 0 | 5  | C |
| Hurk et al., 2020          | Poorly-defined population   | 1 | 1 | 2 | 0 | 2 | 0 | 6  | C |

|                          |                                               |   |   |   |   |   |   |   |   |
|--------------------------|-----------------------------------------------|---|---|---|---|---|---|---|---|
| Hassan et al., 2020      | Poorly-defined population                     | 1 | 1 | 2 | 0 | 2 | 0 | 6 | C |
| Weis et al., 2020        | General population                            | 3 | 1 | 0 | 1 | 0 | 0 | 5 | C |
| Rigatti et al., 2020     | Poorly-defined population                     | 1 | 1 | 0 | 0 | 2 | 0 | 4 | C |
| Faniyi et al., 2020      | Poorly-defined population                     | 1 | 1 | 0 | 0 | 0 | 0 | 2 | D |
| Stout et al., 2020       | Poorly-defined population                     | 1 | 1 | 0 | 0 | 2 | 0 | 4 | C |
| Gomes et al., 2020       | General population                            | 3 | 1 | 0 | 0 | 2 | 0 | 6 | C |
| Wu et al., 2020          | General population, Poorly-defined population | 3 | 1 | 0 | 2 | 0 | 0 | 6 | C |
| Rebeiro et al., 2020     | Poorly-defined population                     | 2 | 1 | 0 | 0 | 0 | 0 | 3 | D |
| Schubl et al., 2020      | Low-risk healthcare workers                   | 1 | 1 | 0 | 0 | 2 | 0 | 4 | C |
| Majdoubi et al., 2020    | Poorly-defined population                     | 2 | 1 | 0 | 0 | 2 | 2 | 7 | B |
| Nakamura et al., 2020    | Low-risk healthcare workers                   | 1 | 1 | 0 | 1 | 0 | 0 | 3 | D |
| Tsertsvadze et al., 2020 | General population                            | 1 | 1 | 0 | 0 | 2 | 2 | 6 | C |
| Reuben et al., 2020      | Poorly-defined population                     | 2 | 1 | 0 | 0 | 2 | 0 | 5 | C |

|                        |                                                        |   |   |   |   |   |   |   |   |
|------------------------|--------------------------------------------------------|---|---|---|---|---|---|---|---|
| Bahrs et al., 2020     | Low-risk healthcare workers                            | 1 | 1 | 0 | 1 | 2 | 0 | 5 | C |
| Chibwana et al., 2020  | Poorly-defined population                              | 1 | 1 | 0 | 0 | 0 | 2 | 4 | C |
| Laub et al., 2020      | Poorly-defined population                              | 1 | 1 | 0 | 2 | 2 | 0 | 6 | C |
| Armann et al., 2020    | Poorly-defined population                              | 2 | 1 | 0 | 1 | 0 | 0 | 4 | C |
| Hibino et al., 2020    | Poorly-defined population                              | 1 | 1 | 0 | 0 | 0 | 0 | 2 | D |
| Barchuk et al., 2020   | General population                                     | 2 | 1 | 0 | 1 | 2 | 2 | 8 | B |
| Wilkins et al., 2020   | Low-risk healthcare workers                            | 2 | 1 | 0 | 0 | 2 | 0 | 5 | C |
| Abo-Leyah et al., 2020 | Low-risk healthcare workers, Poorly-defined population | 1 | 1 | 0 | 0 | 2 | 0 | 4 | C |
| Vince et al., 2020     | Poorly-defined population                              | 1 | 1 | 0 | 0 | 0 | 0 | 2 | D |
| Alkurt et al., 2020    | Poorly-defined population                              | 2 | 1 | 0 | 0 | 0 | 0 | 3 | D |
| Vassallo et al., 2020  | Poorly-defined population                              | 1 | 1 | 0 | 0 | 2 | 0 | 4 | C |
| Melo et al., 2020      | Poorly-defined population                              | 2 | 1 | 2 | 0 | 0 | 0 | 5 | C |
| Favara et al., 2020    | High-risk healthcare workers                           | 2 | 1 | 2 | 1 | 0 | 0 | 6 | C |

|                           |                                                        |   |   |   |   |   |   |   |   |
|---------------------------|--------------------------------------------------------|---|---|---|---|---|---|---|---|
| Remes-Troche et al., 2020 | Poorly-defined population                              | 1 | 1 | 0 | 0 | 2 | 0 | 4 | C |
| Ladage et al., 2020       | General population                                     | 2 | 1 | 2 | 1 | 0 | 0 | 6 | C |
| Silva et al., 2020        | Low-risk healthcare workers                            | 2 | 1 | 2 | 0 | 0 | 0 | 5 | C |
| Craigie et al., 2020      | Poorly-defined population                              | 1 | 1 | 2 | 1 | 0 | 0 | 5 | C |
| Silva et al., 2020        | Poorly-defined population                              | 1 | 1 | 0 | 1 | 0 | 0 | 3 | D |
| Strazzulla et al., 2020   | Poorly-defined population                              | 1 | 1 | 0 | 0 | 2 | 0 | 4 | C |
| Ray et al., 2020          | Poorly-defined population                              | 1 | 1 | 2 | 1 | 2 | 0 | 7 | B |
| Bardai et al., 2020       | Low-risk healthcare workers, Poorly-defined population | 1 | 1 | 0 | 0 | 0 | 0 | 2 | D |
| Cooper et al., 2020       | Poorly-defined population                              | 1 | 1 | 0 | 0 | 2 | 0 | 4 | C |
| Hommel et al., 2020       | Poorly-defined population                              | 2 | 1 | 0 | 0 | 0 | 0 | 3 | D |
| Nishida et al., 2020      | Low-risk healthcare workers                            | 1 | 1 | 0 | 0 | 2 | 0 | 4 | C |
| Nawa et al., 2020         | General population                                     | 2 | 1 | 0 | 0 | 2 | 0 | 5 | C |

|                         |                                                               |   |   |   |   |   |   |    |   |
|-------------------------|---------------------------------------------------------------|---|---|---|---|---|---|----|---|
| Qutob et al., 2020      | General population,<br>Poorly-defined<br>population           | 3 | 1 | 0 | 0 | 2 | 0 | 6  | C |
| Khan et al., 2020       | Poorly-defined<br>population                                  | 2 | 1 | 0 | 0 | 2 | 0 | 5  | C |
| Haq et al., 2020        | High-risk healthcare<br>workers                               | 1 | 1 | 0 | 0 | 2 | 0 | 4  | C |
| Jin et al., 2020        | Poorly-defined<br>population                                  | 1 | 1 | 0 | 2 | 0 | 0 | 4  | C |
| Ulyte et al., 2020      | Poorly-defined<br>population                                  | 2 | 1 | 2 | 0 | 2 | 2 | 9  | B |
| Asuquo et al., 2020     | Poorly-defined<br>population                                  | 2 | 1 | 0 | 0 | 0 | 0 | 3  | D |
| Ward et al., 2020       | General population                                            | 3 | 1 | 2 | 0 | 2 | 2 | 10 | A |
| Menezes et al., 2020    | General population                                            | 3 | 1 | 2 | 0 | 0 | 0 | 6  | C |
| Laursen et al., 2020    | Low-risk healthcare<br>workers, Poorly-<br>defined population | 1 | 1 | 2 | 1 | 2 | 0 | 7  | B |
| Kahlert et al., 2020    | Low-risk healthcare<br>workers                                | 2 | 1 | 0 | 1 | 2 | 0 | 6  | C |
| ROEDERER et al., 2020   | Poorly-defined<br>population                                  | 2 | 1 | 0 | 2 | 2 | 0 | 7  | B |
| Demonbreun et al., 2020 | Poorly-defined<br>population                                  | 1 | 1 | 0 | 0 | 2 | 0 | 4  | C |

|                           |                             |   |   |   |   |   |   |   |   |
|---------------------------|-----------------------------|---|---|---|---|---|---|---|---|
| Ariza et al., 2020        | Low-risk healthcare workers | 1 | 1 | 2 | 1 | 2 | 0 | 7 | B |
| Majiya et al., 2020       | General population          | 3 | 1 | 2 | 0 | 2 | 0 | 8 | B |
| Javed et al., 2020        | General population          | 3 | 1 | 0 | 0 | 0 | 0 | 4 | C |
| Buonsenso et al., 2020    | Close contacts              | 1 | 1 | 0 | 0 | 0 | 0 | 2 | D |
| Kasztelewicz et al., 2020 | Poorly-defined population   | 1 | 1 | 0 | 0 | 2 | 0 | 4 | C |
| Malecki et al., 2020      | General population          | 2 | 1 | 0 | 0 | 2 | 0 | 5 | C |
| FUKUDA et al., 2020       | Low-risk healthcare workers | 1 | 1 | 0 | 0 | 2 | 0 | 4 | C |
| Díaz-Salazar et al., 2020 | Poorly-defined population   | 1 | 1 | 0 | 0 | 2 | 2 | 6 | C |
| Bruckner et al., 2020     | General population          | 2 | 1 | 2 | 0 | 2 | 2 | 9 | B |
| Goenka et al., 2020       | Low-risk healthcare workers | 2 | 1 | 0 | 0 | 2 | 0 | 5 | C |
| Flemand et al., 2020      | Poorly-defined population   | 1 | 1 | 2 | 0 | 2 | 0 | 6 | C |
| Lopez et al., 2020        | Poorly-defined population   | 1 | 1 | 0 | 0 | 0 | 2 | 4 | C |
| Ghose et al., 2020        | General population          | 1 | 1 | 0 | 2 | 2 | 0 | 6 | C |



|                          |                             |   |   |   |   |   |   |    |   |
|--------------------------|-----------------------------|---|---|---|---|---|---|----|---|
| Pasqualotto et al., 2020 | Poorly-defined population   | 1 | 1 | 0 | 0 | 0 | 0 | 2  | D |
| Satpati et al., 2020     | General population          | 3 | 1 | 0 | 0 | 2 | 0 | 6  | C |
| Al-Thani et al., 2020    | Poorly-defined population   | 2 | 1 | 0 | 0 | 2 | 0 | 5  | C |
| Sharma et al., 2020      | General population          | 3 | 1 | 0 | 0 | 2 | 2 | 8  | B |
| Kshatri et al., 2020     | General population          | 3 | 1 | 0 | 0 | 2 | 0 | 6  | C |
| Cruz-Arenas et al., 2020 | Low-risk healthcare workers | 2 | 1 | 0 | 1 | 2 | 0 | 6  | C |
| Murhekar et al., 2020    | General population          | 3 | 1 | 2 | 0 | 2 | 2 | 10 | A |
| Rezwan et al., 2020      | Poorly-defined population   | 1 | 1 | 0 | 0 | 2 | 0 | 4  | C |
| Babu et al., 2020        | Poorly-defined population   | 1 | 1 | 0 | 0 | 2 | 2 | 6  | C |
| Thielecke et al., 2020   | Poorly-defined population   | 2 | 1 | 0 | 0 | 0 | 0 | 3  | D |
| Ladage et al., 2020      | General population          | 1 | 1 | 0 | 0 | 0 | 0 | 2  | D |
| Kumar et al., 2020       | Low-risk healthcare workers | 1 | 1 | 0 | 1 | 2 | 0 | 5  | C |
| Official reports         |                             |   |   |   |   |   |   |    |   |

|                                                                 |                           |   |   |   |   |   |   |   |   |
|-----------------------------------------------------------------|---------------------------|---|---|---|---|---|---|---|---|
| MedLife, Romania, 2020                                          | Poorly-defined population | 1 | 1 | 0 | 0 | 0 | 0 | 2 | D |
| Public Health Ontario, 2020                                     | Poorly-defined population | 1 | 1 | 2 | 1 | 2 | 2 | 9 | B |
| Norwegian Institute of Public Health, 2020                      | Poorly-defined population | 1 | 0 | 2 | 0 | 2 | 2 | 7 | B |
| Office for National Statistics, UK, 2020                        | General population        | 2 | 1 | 2 | 0 | 0 | 2 | 7 | B |
| Government of Jersey, 2020                                      | General population        | 3 | 1 | 0 | 0 | 2 | 2 | 8 | B |
| Canadian Blood Services, 2020                                   | Poorly-defined population | 1 | 1 | 0 | 0 | 2 | 2 | 6 | C |
| Ministry of Health, Labour and Welfare, 2020                    | General population        | 2 | 1 | 0 | 1 | 0 | 0 | 4 | C |
| NHS BT collection, 2020                                         | Poorly-defined population | 1 | 1 | 0 | 0 | 2 | 2 | 6 | C |
| RCGP collection, 2020                                           | Poorly-defined population | 1 | 1 | 0 | 1 | 2 | 0 | 5 | C |
| SEU and Paediatric collections, 2020                            | Poorly-defined population | 1 | 1 | 0 | 1 | 2 | 0 | 5 | C |
| Health Protection Surveillance Centre, 2020                     | General population        | 2 | 1 | 0 | 1 | 2 | 0 | 6 | C |
| Islamic Republic of Afghanistan Ministry of Public Health, 2020 | General population        | 3 | 1 | 0 | 0 | 0 | 0 | 4 | C |

**Table S8. The summary of eighty-two grade A and grade B studies included into the main analysis on the basis of WHO regions and pre-defined study populations**

| Author, Country                             | Study population           | No. of specimens tested | Grade |
|---------------------------------------------|----------------------------|-------------------------|-------|
| <b>African Region</b>                       |                            |                         |       |
| Alemu et al., Ethiopia <sup>9</sup>         | General population         | 301                     | B     |
| Majiya et al., Nigeria <sup>10</sup>        | General population         | 185                     | B     |
| Uyoga et al., Kenya <sup>11</sup>           | Poorly-defined population  | 3098                    | B     |
| <b>Region of the Americas</b>               |                            |                         |       |
| Self et al., USA <sup>12</sup>              | Low-risk Healthcare worker | 3248                    | B     |
| Ariza et al., Colombia <sup>13</sup>        | Low-risk Healthcare worker | 351                     | B     |
| Brant-Zawadzki et al., USA <sup>14</sup>    | Low-risk Healthcare worker | 3458                    | B     |
| Sims et al., USA <sup>15</sup>              | Low-risk Healthcare worker | 20614                   | B     |
| Moscola et al., USA <sup>16</sup>           | Low-risk Healthcare worker | 40329                   | B     |
| Hallal et al., Brazil <sup>17</sup>         | General population         | 56157                   | A     |
| Samore et al., USA <sup>18</sup>            | General population         | 8108                    | A     |
| Sood et al., USA <sup>19</sup>              | General population         | 863                     | A     |
| Naranbhai et al., USA <sup>20</sup>         | General population         | 200                     | B     |
| Borges et al., Brazil <sup>21</sup>         | General population         | 2635                    | B     |
| Bruckner et al., USA <sup>22</sup>          | General population         | 2979                    | B     |
| Mahajan et al., USA <sup>23</sup>           | General population         | 567                     | B     |
| Tess et al., Brazil <sup>24</sup>           | General population         | 517                     | B     |
| McLaughlin et al., USA <sup>25</sup>        | General population         | 917                     | B     |
| Rosenberg et al., USA <sup>26</sup>         | General population         | 15101                   | B     |
| Bendavid et al., USA <sup>27</sup>          | General population         | 3330                    | B     |
| Biggs et al., USA <sup>28</sup>             | General population         | 696                     | B     |
| Appa et al., USA <sup>29</sup>              | General population         | 1810                    | B     |
| Public Health Ontario, Canada <sup>30</sup> | Poorly-defined population  | 34700                   | B     |
| Tilley et al., USA <sup>31</sup>            | Poorly-defined population  | 790                     | B     |
| Anand et al., USA <sup>32</sup>             | Poorly-defined population  | 28503                   | B     |
| Brant-Zawadzki et al., USA <sup>14</sup>    | Poorly-defined population  | 226                     | B     |
| Stadlbauer et al., USA <sup>33</sup>        | Poorly-defined population  | 10691                   | B     |
| Majdoubi et al., Canada <sup>34</sup>       | Poorly-defined population  | 276                     | B     |
| Buss et al., Brazil <sup>35</sup>           | Poorly-defined population  | 17526                   | B     |
| Skowronski et al., Canada <sup>36</sup>     | Poorly-defined population  | 1754                    | B     |
| Havers et al., USA <sup>37</sup>            | Poorly-defined population  | 16025                   | B     |
| <b>Eastern Mediterranean Region</b>         |                            |                         |       |
| Poustchi et al., Iran <sup>38</sup>         | General population         | 3530                    | A     |
| Nisar et al., Pakistan <sup>39</sup>        | General population         | 2004                    | B     |

|                                                            |                            |        |   |
|------------------------------------------------------------|----------------------------|--------|---|
| Shakiba et al., Iran <sup>40</sup>                         | General population         | 528    | B |
| Poustchi et al., Iran <sup>38</sup>                        | Poorly-defined population  | 5372   | A |
| <b>European Region</b>                                     |                            |        |   |
| Brotons et al., Spain <sup>41</sup>                        | Close contact              | 1084   | B |
| Iversen et al., Denmark <sup>42</sup>                      | Low-risk Healthcare worker | 28792  | A |
| Laursen et al., Sweden and Denmark <sup>43</sup>           | Low-risk Healthcare worker | 1689   | B |
| Trieu et al., Norway <sup>44</sup>                         | Low-risk Healthcare worker | 607    | B |
| Basteiro et al., Spain <sup>45</sup>                       | Low-risk Healthcare worker | 578    | B |
| Ward et al., UK <sup>46</sup>                              | General population         | 365104 | A |
| Stringhini et al., Switzerland <sup>47</sup>               | General population         | 2766   | A |
| Richard et al., Switzerland <sup>48</sup>                  | General population         | 5567   | A |
| Office for National Statistics, UK <sup>49</sup>           | General population         | 9343   | B |
| Gudbjartsson et al., Iceland <sup>50</sup>                 | General population         | 5506   | B |
| Carrat et al., France <sup>51</sup>                        | General population         | 14628  | B |
| Barchuk et al., Russia <sup>52</sup>                       | General population         | 1038   | B |
| Vos et al., Netherlands <sup>53</sup>                      | General population         | 3147   | B |
| Santos-Hövenner et al., Germany <sup>54</sup>              | General population         | 2203   | B |
| Streeck et al., Germany <sup>55</sup>                      | General population         | 919    | B |
| Snoeck et al., Luxembourg <sup>56</sup>                    | General population         | 1820   | B |
| Pollán et al., Spain <sup>57</sup>                         | General population         | 51958  | B |
| Petersen et al., Denmark <sup>58</sup>                     | General population         | 1075   | B |
| Government of Jersey, UK <sup>59</sup>                     | General population         | 855    | B |
| Vu et al., France <sup>60</sup>                            | Poorly-defined population  | 11021  | A |
| Iversen et al., Denmark <sup>42</sup>                      | Poorly-defined population  | 4672   | A |
| Gudbjartsson et al., Iceland <sup>50</sup>                 | Poorly-defined population  | 22831  | B |
| Dimeglio et al., France <sup>61</sup>                      | Poorly-defined population  | 8758   | B |
| Dillner et al., Sweden <sup>62</sup>                       | Poorly-defined population  | 12928  | B |
| Jespersen et al., Denmark <sup>63</sup>                    | Poorly-defined population  | 17948  | B |
| Norwegian Institute of Public Health, Norway <sup>64</sup> | Poorly-defined population  | 900    | B |
| Anna et al., France <sup>65</sup>                          | Poorly-defined population  | 1847   | B |
| Laursen et al., Sweden and Denmark <sup>43</sup>           | Poorly-defined population  | 1583   | B |
| ROEDERER et al., France <sup>66</sup>                      | Poorly-defined population  | 818    | B |
| Slot et al., Netherlands <sup>67</sup>                     | Poorly-defined population  | 7361   | B |
| Jõgi et al., Estonia <sup>68</sup>                         | Poorly-defined population  | 1960   | B |
| Berte et al., Italy and Germany <sup>69</sup>              | Poorly-defined population  | 354    | B |

|                                                 |                             |       |   |
|-------------------------------------------------|-----------------------------|-------|---|
| Bloomfield et al., Czech Republic <sup>70</sup> | Poorly-defined population   | 200   | B |
| Ulyte et al., Switzerland <sup>71</sup>         | Poorly-defined population   | 2496  | B |
| Valenti et al., Italy <sup>72</sup>             | Poorly-defined population   | 789   | B |
| Erikstrup et al., Denmark <sup>73</sup>         | Poorly-defined population   | 20640 | B |
| Bogogiannidou et al., Greece <sup>74</sup>      | Poorly-defined population   | 6586  | B |
| Plebani et al., Italy <sup>75</sup>             | Poorly-defined population   | 8285  | B |
| <b>South-East Asia Region</b>                   |                             |       |   |
| Woon et al., Malaysia <sup>76</sup>             | Low-risk Healthcare worker  | 400   | B |
| Nopsopon et al., Thailand <sup>77</sup>         | Low-risk Healthcare worker  | 675   | B |
| Murhekar et al., India <sup>78</sup>            | General population          | 28000 | A |
| Murhekar et al., India <sup>79</sup>            | General population          | 29082 | A |
| Malani et al., India <sup>80</sup>              | General population          | 6904  | B |
| Sharma et al., India <sup>81</sup>              | General population          | 47470 | B |
| Ray et al., India <sup>82</sup>                 | Poorly-defined population   | 212   | B |
| Nopsopon et al., Thailand <sup>77</sup>         | Poorly-defined population   | 182   | B |
| <b>Western Pacific Region</b>                   |                             |       |   |
| Chen et al., China <sup>83</sup>                | High-risk Healthcare worker | 105   | B |
| Ko et al., South Korea <sup>84</sup>            | Low-risk Healthcare worker  | 432   | B |
| Wang et al., China <sup>85</sup>                | General population          | 2184  | A |
| Ling et al., China <sup>86</sup>                | General population          | 18712 | B |
| To et al., China <sup>87</sup>                  | Poorly-defined population   | 1265  | B |
| Ho et al., China <sup>88</sup>                  | Poorly-defined population   | 14765 | B |
| Sam et al., Malaysia <sup>89</sup>              | Poorly-defined population   | 588   | B |
| Xu et al., China <sup>90</sup>                  | Poorly-defined population   | 4747  | B |

**Table S9. Estimated seroprevalence of antibodies to SARS-CoV-2 by WHO regions and study population among eighty-two grade A and grade B studies**

| Study population              | All infections |                             |                                    |                                                    |                    | Symptomatic infections |                             |                                    |                                                    |                    | Asymptomatic infections |                             |                                    |                                                    |                    |
|-------------------------------|----------------|-----------------------------|------------------------------------|----------------------------------------------------|--------------------|------------------------|-----------------------------|------------------------------------|----------------------------------------------------|--------------------|-------------------------|-----------------------------|------------------------------------|----------------------------------------------------|--------------------|
|                               | No. of studies | Total no. of positive serum | Total no. of participants provided | Estimated seroprevalence (95% confidence interval) | I <sup>2</sup> (P) | No. of studies         | Total no. of positive serum | Total no. of participants provided | Estimated seroprevalence (95% confidence interval) | I <sup>2</sup> (P) | No. of studies          | Total no. of positive serum | Total no. of participants provided | Estimated seroprevalence (95% confidence interval) | I <sup>2</sup> (P) |
| <b>Overall</b>                |                |                             |                                    |                                                    |                    |                        |                             |                                    |                                                    |                    |                         |                             |                                    |                                                    |                    |
| Close contacts                | 1              | 195                         | 1084                               | 18.0 [15.7-20.3]                                   | -                  | 0                      | -                           | -                                  | -                                                  | -                  | 0                       | -                           | -                                  | -                                                  | -                  |
| High-risk HCWs                | 1              | 18                          | 105                                | 17.1 [9.9-24.4]                                    | -                  | 1                      | 4                           | 105                                | 3.8 [0.1-7.5]                                      | -                  | 1                       | 14                          | 105                                | 13.3 [6.8-19.8]                                    | -                  |
| Low-risk HCWs                 | 12             | 8512                        | 101173                             | 4.2 [1.5-6.9]                                      | 99.8 (p<0.001)     | 6                      | 1161                        | 25720                              | 1.7 [0.0-3.7]                                      | 99.4 (p<0.001)     | 6                       | 861                         | 25720                              | 1.2 [0.0-2.7]                                      | 99.2 (p<0.001)     |
| General population            | 38             | 45949                       | 698709                             | 8.0 [6.8-9.2]                                      | 99.9 (p<0.001)     | 14                     | 13443                       | 452004                             | 2.1 [1.3-2.8]                                      | 99.9 (p<0.001)     | 14                      | 7817                        | 452004                             | 1.9 [1.3-2.5]                                      | 99.5 (p<0.001)     |
| Poorly-defined population     | 36             | 13079                       | 272697                             | 4.8 [4.0-5.6]                                      | 99.7 (p<0.001)     | 4                      | 10                          | 1601                               | 0.4 [0.0-1.1]                                      | 69.7 (p=0.019)     | 4                       | 42                          | 1601                               | 1.3 [0.0-2.8]                                      | 92.5 (p<0.001)     |
| <b>African Region</b>         |                |                             |                                    |                                                    |                    |                        |                             |                                    |                                                    |                    |                         |                             |                                    |                                                    |                    |
| Close contacts                | 0              | -                           | -                                  | -                                                  | -                  | 0                      | -                           | -                                  | -                                                  | -                  | 0                       | -                           | -                                  | -                                                  | -                  |
| High-risk HCWs                | 0              | -                           | -                                  | -                                                  | -                  | 0                      | -                           | -                                  | -                                                  | -                  | 0                       | -                           | -                                  | -                                                  | -                  |
| Low-risk HCWs                 | 0              | -                           | -                                  | -                                                  | -                  | 0                      | -                           | -                                  | -                                                  | -                  | 0                       | -                           | -                                  | -                                                  | -                  |
| General population            | 2              | 70                          | 486                                | 16.3 [0.0-33.7]                                    | 96.0 (p<0.001)     | 1                      | 25                          | 185                                | 13.5 [8.6-18.4]                                    | -                  | 1                       | 22                          | 185                                | 11.9 [7.2-16.6]                                    | -                  |
| Poorly-defined population     | 1              | 174                         | 3098                               | 5.6 [4.8-6.4]                                      | -                  | 0                      | -                           | -                                  | -                                                  | -                  | 0                       | -                           | -                                  | -                                                  | -                  |
| <b>Region of the Americas</b> |                |                             |                                    |                                                    |                    |                        |                             |                                    |                                                    |                    |                         |                             |                                    |                                                    |                    |
| Close contacts                | 0              | -                           | -                                  | -                                                  | -                  | 0                      | -                           | -                                  | -                                                  | -                  | 0                       | -                           | -                                  | -                                                  | -                  |

|                                     |    |       |        |                  |                |   |       |        |               |                |   |      |        |               |                |
|-------------------------------------|----|-------|--------|------------------|----------------|---|-------|--------|---------------|----------------|---|------|--------|---------------|----------------|
| High-risk HCWs                      | 0  | -     | -      | -                | -              | 0 | -     | -      | -             | -              | 0 | -    | -      | -             | -              |
| Low-risk HCWs                       | 5  | 7575  | 68000  | 6.4 [0.7-12.0]   | 99.9 (p<0.001) | 3 | 1160  | 24213  | 3.5 [1.8-5.3] | 95.4 (p<0.001) | 3 | 860  | 24213  | 2.3 [0.5-4.1] | 97.5 (p<0.001) |
| General population                  | 13 | 4055  | 93880  | 6.8 [5.0-8.5]    | 99.5 (p<0.001) | 4 | 56    | 4761   | 1.9 [0.1-3.7] | 94.8 (p<0.001) | 4 | 239  | 4761   | 2.8 [0.0-5.6] | 98.1 (p<0.001) |
| Poorly-defined population           | 9  | 7491  | 110491 | 6.0 [3.1-8.9]    | 99.9 (p<0.001) | 1 | 2     | 276    | 0.7 [0.0-1.7] | -              | 1 | 1    | 276    | 0.4 [0.0-1.1] | -              |
| <b>Eastern Mediterranean Region</b> |    |       |        |                  |                |   |       |        |               |                |   |      |        |               |                |
| Close contacts                      | 0  | -     | -      | -                | -              | 0 | -     | -      | -             | -              | 0 | -    | -      | -             | -              |
| High-risk HCWs                      | 0  | -     | -      | -                | -              | 0 | -     | -      | -             | -              | 0 | -    | -      | -             | -              |
| Low-risk HCWs                       | 0  | -     | -      | -                | -              | 0 | -     | -      | -             | -              | 0 | -    | -      | -             | -              |
| General population                  | 3  | 691   | 6062   | 13.4 [8.8-18.0]  | 96.3 (p<0.001) | 0 | -     | -      | -             | -              | 0 | -    | -      | -             | -              |
| Poorly-defined population           | 1  | 691   | 5372   | 12.9 [12.0-13.8] | -              | 0 | -     | -      | -             | -              | 0 | -    | -      | -             | -              |
| <b>European Region</b>              |    |       |        |                  |                |   |       |        |               |                |   |      |        |               |                |
| Close contacts                      | 1  | 195   | 1084   | 18.0 [15.7-20.3] | -              | 0 | -     | -      | -             | -              | 0 | -    | -      | -             | -              |
| High-risk HCWs                      | 0  | -     | -      | -                | -              | 0 | -     | -      | -             | -              | 0 | -    | -      | -             | -              |
| Low-risk HCWs                       | 4  | 935   | 31666  | 4.5 [2.3-6.7]    | 95.3 (p<0.001) | 0 | -     | -      | -             | -              | 7 | 6929 | 426162 | 1.3 [0.6-1.9] | 99.0 (p<0.001) |
| General population                  | 14 | 21988 | 465929 | 4.7 [3.6-5.9]    | 99.5 (p<0.001) | 7 | 13362 | 426162 | 2.4 [1.5-3.3] | 99.2 (p<0.001) | 2 | 40   | 1143   | 2.5 [0.0-7.4] | 97.5 (p<0.001) |
| Poorly-defined population           | 19 | 4561  | 131977 | 4.4 [3.4-5.3]    | 99.4 (p<0.001) | 2 | 8     | 1143   | 1.0 [0.0-3.2] | 87.6 (p=0.004) | 0 | -    | -      | -             | -              |
| <b>South-East Asia Region</b>       |    |       |        |                  |                |   |       |        |               |                |   |      |        |               |                |
| Close contacts                      | 0  | -     | -      | -                | -              | 0 | -     | -      | -             | -              | 0 | -    | -      | -             | -              |
| High-risk HCWs                      | 0  | -     | -      | -                | -              | 0 | -     | -      | -             | -              | 0 | -    | -      | -             | -              |
| Low-risk HCWs                       | 2  | 1     | 1075   | 0.1 [0.0-0.3]    | 0.0 (p=0.520)  | 2 | 1     | 1075   | 0.1 [0.0-0.3] | 0.0 (p=0.520)  | 2 | 0    | 1075   | 0.0 [0.0-0.2] | 0.0 (p=0.520)  |
| General population                  | 4  | 18518 | 111456 | 19.6 [5.5-33.6]  | 100 (p<0.001)  | 0 | -     | -      | -             | -              | 0 | -    | -      | -             | -              |

|                               |   |     |       |                 |                |   |   |       |               |               |   |     |       |                 |                |
|-------------------------------|---|-----|-------|-----------------|----------------|---|---|-------|---------------|---------------|---|-----|-------|-----------------|----------------|
| Poorly-defined population     | 2 | 43  | 394   | 10.0 [0.0-28.9] | 97.9 (p<0.001) | 1 | 0 | 182   | 0.0 [0.0-0.8] | -             | 1 | 1   | 182   | 0.5 [0.0-1.6]   | -              |
| <b>Western Pacific Region</b> |   |     |       |                 |                |   |   |       |               |               |   |     |       |                 |                |
| Close contacts                | 0 | -   | -     | -               | -              | 0 | - | -     | -             | -             | 0 | -   | -     | -               | -              |
| High-risk HCWs                | 1 | 18  | 105   | 17.1 [9.9-24.4] | -              | 1 | 4 | 105   | 3.8 [0.1-7.5] | -             | 1 | 14  | 105   | 13.3 [6.8-19.8] | -              |
| Low-risk HCWs                 | 1 | 1   | 432   | 0.2 [0.0-0.7]   | -              | 1 | 0 | 432   | 0.0 [0.0-0.3] | -             | 1 | 1   | 432   | 0.2 [0.0-0.7]   | -              |
| General population            | 2 | 627 | 20896 | 1.7 [0.0-5.0]   | 99.8 (p<0.001) | 2 | 0 | 20896 | 0.0 [0.0-0.0] | 0.0 (p=1.000) | 2 | 627 | 20896 | 1.7 [0.0-5.0]   | 99.8 (p<0.001) |
| Poorly-defined population     | 4 | 119 | 21365 | 0.9 [0.0-1.9]   | 96.9 (p<0.001) | 0 | - | -     | -             | -             | 0 | -   | -     | -               | -              |



**Table S10. Sensitivity analysis of seroprevalence of antibodies to SARS-CoV-2 among eighty-two grade A and grade B studies, considering alternative serological assays used in the same study and seropositive by any positives of the assays**

| Study population              | Studies using original serological assays<br>(Main analysis) |                       |                                          |                                                    |                    | Studies using alternative serological assays<br>(Sensitivity analysis I) |                       |                                          |                                                    |                    | Any positives of the assays<br>(Sensitivity analysis II)* |                       |                                          |                                                    |                    |
|-------------------------------|--------------------------------------------------------------|-----------------------|------------------------------------------|----------------------------------------------------|--------------------|--------------------------------------------------------------------------|-----------------------|------------------------------------------|----------------------------------------------------|--------------------|-----------------------------------------------------------|-----------------------|------------------------------------------|----------------------------------------------------|--------------------|
|                               | No. of studies                                               | Total no. of positive | Total no. of participants provided serum | Estimated seroprevalence (95% confidence interval) | I <sup>2</sup> (P) | No. of studies                                                           | Total no. of positive | Total no. of participants provided serum | Estimated seroprevalence (95% confidence interval) | I <sup>2</sup> (P) | No. of studies                                            | Total no. of positive | Total no. of participants provided serum | Estimated seroprevalence (95% confidence interval) | I <sup>2</sup> (P) |
| <b>Overall</b>                |                                                              |                       |                                          |                                                    |                    |                                                                          |                       |                                          |                                                    |                    |                                                           |                       |                                          |                                                    |                    |
| Close contacts                | 1                                                            | 195                   | 1084                                     | 18.0 [15.7-20.3]                                   | -                  | 1                                                                        | 195                   | 1084                                     | 18.0 [15.7-20.3]                                   | -                  | 1                                                         | 195                   | 1084                                     | 18.0 [15.7-20.3]                                   | -                  |
| High-risk HCWs                | 1                                                            | 18                    | 105                                      | 17.1 [9.9-24.4]                                    | -                  | 1                                                                        | 18                    | 105                                      | 17.1 [9.9-24.4]                                    | -                  | 1                                                         | 18                    | 105                                      | 17.1 [9.9-24.4]                                    | -                  |
| Low-risk HCWs                 | 12                                                           | 8512                  | 101173                                   | 4.2 [1.5-6.9]                                      | 99.8 (p<0.001)     | 12                                                                       | 8511                  | 101173                                   | 4.2 [1.5-6.9]                                      | 99.8 (p<0.001)     | 12                                                        | 8513                  | 101173                                   | 4.2 [1.6-6.9]                                      | 99.8 (p<0.001)     |
| General population            | 38                                                           | 45949                 | 698709                                   | 8.0 [6.8-9.2]                                      | 99.8 (p<0.001)     | 38                                                                       | 46618                 | 707823                                   | 8.0 [6.8-9.3]                                      | 99.9 (p<0.001)     | 38                                                        | 46823                 | 698709                                   | 8.1 [6.9-9.4]                                      | 99.9 (p<0.001)     |
| Poorly-defined population     | 36                                                           | 13079                 | 272697                                   | 4.8 [4.0-5.6]                                      | 99.7 (p<0.001)     | 36                                                                       | 13079                 | 272697                                   | 4.8 [4.0-5.6]                                      | 99.7 (p<0.001)     | 36                                                        | 13193                 | 272697                                   | 4.8 [4.0-5.6]                                      | 99.7 (p<0.001)     |
| <b>African Region</b>         |                                                              |                       |                                          |                                                    |                    |                                                                          |                       |                                          |                                                    |                    |                                                           |                       |                                          |                                                    |                    |
| General population            | 2                                                            | 70                    | 486                                      | 16.3 [0.0-33.7]                                    | 96.0 (p<0.001)     | 2                                                                        | 70                    | 486                                      | 16.3 [0.0-33.7]                                    | 96.0 (p<0.001)     | 2                                                         | 70                    | 486                                      | 16.3 [0.0-33.7]                                    | 96.0 (p<0.001)     |
| Poorly-defined population     | 1                                                            | 174                   | 3098                                     | 5.6 [4.8-6.4]                                      | -                  | 1                                                                        | 174                   | 3098                                     | 5.6 [4.8-6.4]                                      | -                  | 1                                                         | 174                   | 3098                                     | 5.6 [4.8-6.4]                                      | -                  |
| <b>Region of the Americas</b> |                                                              |                       |                                          |                                                    |                    |                                                                          |                       |                                          |                                                    |                    |                                                           |                       |                                          |                                                    |                    |
| Low-risk HCWs                 | 5                                                            | 7575                  | 68000                                    | 6.4 [0.7-12.0]                                     | 99.9 (p<0.001)     | 5                                                                        | 7574                  | 68000                                    | 6.3 [0.7-11.9]                                     | 99.9 (p<0.001)     | 5                                                         | 7576                  | 68000                                    | 6.4 [0.8-12.1]                                     | 99.9 (p<0.001)     |

|                                     |    |       |        |                  |                 |    |       |        |                  |                 |    |       |        |                  |                 |
|-------------------------------------|----|-------|--------|------------------|-----------------|----|-------|--------|------------------|-----------------|----|-------|--------|------------------|-----------------|
| General population                  | 13 | 4055  | 93880  | 6.8 [5.0-8.5]    | 99.5 (p<0.001)  | 13 | 4050  | 93880  | 6.7 [5.0-8.3]    | 99.5 (p<0.001)  | 13 | 4057  | 93880  | 6.8 [5.0-8.5]    | 99.5 (p<0.001)  |
| Poorly-defined population           | 9  | 7491  | 110491 | 6.0 [3.1-8.9]    | 99.8 (p<0.001)  | 9  | 7491  | 110491 | 6.0 [3.1-8.9]    | 99.9 (p<0.001)  | 9  | 7491  | 110491 | 6.0 [3.1-8.9]    | 99.9 (p<0.001)  |
| <b>Eastern Mediterranean Region</b> |    |       |        |                  |                 |    |       |        |                  |                 |    |       |        |                  |                 |
| General population                  | 3  | 691   | 6062   | 13.4 [8.8-18.0]  | 97.8 (p<0.001)  | 3  | 691   | 6062   | 13.4 [8.8-18.0]  | 96.3 (p<0.001)  | 3  | 691   | 6062   | 13.4 [8.8-18.0]  | 96.3 (p<0.001)  |
| Poorly-defined population           | 1  | 691   | 5372   | 12.9 [12.0-13.8] | -               | 1  | 691   | 5372   | 12.9 [12.0-13.8] | -               | 1  | 691   | 5372   | 12.9 [12.0-13.8] | -               |
| <b>European Region</b>              |    |       |        |                  |                 |    |       |        |                  |                 |    |       |        |                  |                 |
| Close contact                       | 1  | 195   | 1084   | 18.0 [15.7-20.3] | -               | 1  | 195   | 1084   | 18.0 [15.7-20.3] | -               | 1  | 195   | 1084   | 18.0 [15.7-20.3] | -               |
| Low-risk HCWs                       | 4  | 935   | 31666  | 4.5 [2.3-6.7]    | 95.3 (p<0.001)  | 4  | 935   | 31666  | 4.5 [2.3-6.7]    | 95.3 (p<0.001)  | 4  | 935   | 31666  | 4.5 [2.3-6.7]    | 95.3 (p<0.001)  |
| General population                  | 14 | 21988 | 465929 | 4.7 [3.6-5.9]    | 99.5 (p<0.001)  | 14 | 22662 | 475043 | 4.8 [3.7-6.0]    | 99.5 (p<0.001)  | 14 | 22860 | 465929 | 5.0 [3.9-6.1]    | 99.4 (p<0.001)  |
| Poorly-defined population           | 19 | 4561  | 131977 | 4.4 [3.4-5.3]    | 99.4 (p<0.001)  | 19 | 4561  | 131977 | 4.4 [3.4-5.3]    | 99.4 (p<0.001)  | 19 | 4675  | 131977 | 4.4 [3.4-5.3]    | 99.3 (p<0.001)  |
| <b>South-East Asia Region</b>       |    |       |        |                  |                 |    |       |        |                  |                 |    |       |        |                  |                 |
| Low-risk HCWs                       | 2  | 1     | 1075   | 0.1 [0.0-0.3]    | 0.0 (p=0.520)   | 2  | 1     | 1075   | 0.1 [0.0-0.3]    | 0.0 (p=0.520)   | 2  | 1     | 1075   | 0.1 [0.0-0.3]    | 0.0 (p=0.520)   |
| General population                  | 4  | 18518 | 111456 | 19.6 [5.5-33.6]  | 100.0 (p<0.001) | 4  | 18518 | 111456 | 19.6 [5.5-33.6]  | 100.0 (p<0.001) | 4  | 18518 | 111456 | 19.6 [5.5-33.6]  | 100.0 (p<0.001) |
| Poorly-defined population           | 2  | 43    | 394    | 10.0 [0.0-28.9]  | 97.9 (p<0.001)  | 2  | 43    | 394    | 10.0 [0.0-28.9]  | 97.9 (p<0.001)  | 2  | 43    | 394    | 10.0 [0.0-28.9]  | 97.9 (p<0.001)  |
| <b>Western Pacific Region</b>       |    |       |        |                  |                 |    |       |        |                  |                 |    |       |        |                  |                 |
| High-risk HCWs                      | 1  | 18    | 105    | 17.1 [9.9-24.4]  | -               | 1  | 18    | 105    | 17.1 [9.9-24.4]  | -               | 1  | 18    | 105    | 17.1 [9.9-24.4]  | -               |

|                           |   |     |       |               |                |   |     |       |               |                |   |     |       |               |                |
|---------------------------|---|-----|-------|---------------|----------------|---|-----|-------|---------------|----------------|---|-----|-------|---------------|----------------|
| Low-risk HCWs             | 1 | 1   | 432   | 0.2 [0.0-0.7] | -              | 1 | 1   | 432   | 0.2 [0.0-0.7] | -              | 1 | 1   | 432   | 0.2 [0.0-0.7] | -              |
| General population        | 2 | 627 | 20896 | 1.7 [0.0-5.0] | 99.8 (p<0.001) | 2 | 627 | 20896 | 1.7 [0.0-5.0] | 99.8 (p<0.001) | 2 | 627 | 20896 | 1.7 [0.0-5.0] | 99.8 (p<0.001) |
| Poorly-defined population | 4 | 119 | 21365 | 0.9 [0.0-1.9] | 96.9 (p<0.001) | 4 | 119 | 21365 | 0.9 [0.0-1.9] | 96.9 (p<0.001) | 4 | 119 | 21365 | 0.9 [0.0-1.9] | 96.9 (p<0.001) |

---

\* Some studies tested different number of specimens with two serological assays, which may lead to the difference of total number of participants being tested between different sensitivity analyses.

**Table S11. Sensitivity analysis of seroprevalence adjusted for test performance among eighty-two grade A and grade B studies**

| Study population                    | Pooled estimates of crude seroprevalence<br>(main analysis) |                       |                                          |                                                                          |                | Pooled estimates of seroprevalence adjusted for test performance<br>(Sensitivity analysis III) |                       |                                          |                                                                          |                |
|-------------------------------------|-------------------------------------------------------------|-----------------------|------------------------------------------|--------------------------------------------------------------------------|----------------|------------------------------------------------------------------------------------------------|-----------------------|------------------------------------------|--------------------------------------------------------------------------|----------------|
|                                     | No. of studies                                              | Total no. of positive | Total no. of participants provided serum | Estimated seroprevalence I <sup>2</sup> (P)<br>(95% confidence interval) |                | No. of studies                                                                                 | Total no. of positive | Total no. of participants provided serum | Estimated seroprevalence I <sup>2</sup> (P)<br>(95% confidence interval) |                |
| <b>Overall</b>                      |                                                             |                       |                                          |                                                                          |                |                                                                                                |                       |                                          |                                                                          |                |
| Close contacts                      | 1                                                           | 195                   | 1084                                     | 18.0 [15.7-20.3]                                                         | -              | 1                                                                                              | 175                   | 1084                                     | 16.1 [14.0-18.3]                                                         | -              |
| High-risk HCWs                      | 1                                                           | 18                    | 105                                      | 17.1 [9.9-24.4]                                                          | -              | 1                                                                                              | 18                    | 105                                      | 17.1 [9.9-24.4]                                                          | -              |
| Low-risk HCWs                       | 12                                                          | 8512                  | 101173                                   | 4.2 [1.5-6.9]                                                            | 99.8 (p<0.001) | 12                                                                                             | 8814                  | 101173                                   | 4.4 [1.6-7.2]                                                            | 99.8 (p<0.001) |
| General population                  | 38                                                          | 45949                 | 698709                                   | 8.0 [6.8-9.2]                                                            | 99.8 (p<0.001) | 38                                                                                             | 46671                 | 698709                                   | 8.2 [7.0-9.4]                                                            | 99.9 (p<0.001) |
| Poorly-defined population           | 36                                                          | 13079                 | 272697                                   | 4.8 [4.0-5.6]                                                            | 99.7 (p<0.001) | 36                                                                                             | 13606                 | 272697                                   | 4.4 [4.0-4.8]                                                            | 99.8 (p<0.001) |
| <b>African Region</b>               |                                                             |                       |                                          |                                                                          |                |                                                                                                |                       |                                          |                                                                          |                |
| General population                  | 2                                                           | 70                    | 486                                      | 16.3 [0.0-33.7]                                                          | 96.0 (p<0.001) | 2                                                                                              | 73                    | 486                                      | 16.8 [0.4-33.2]                                                          | 95.4 (p<0.001) |
| Poorly-defined population           | 1                                                           | 174                   | 3098                                     | 5.6 [4.8-6.4]                                                            | -              | 1                                                                                              | 161                   | 3098                                     | 5.2 [4.4-6.0]                                                            | -              |
| <b>Region of the Americas</b>       |                                                             |                       |                                          |                                                                          |                |                                                                                                |                       |                                          |                                                                          |                |
| Low-risk HCWs                       | 5                                                           | 7575                  | 68000                                    | 6.4 [0.7-12.0]                                                           | 99.9 (p<0.001) | 5                                                                                              | 7849                  | 68000                                    | 6.3 [0.5-12.2]                                                           | 99.9 (p<0.001) |
| General population                  | 13                                                          | 4055                  | 93880                                    | 6.8 [5.0-8.5]                                                            | 99.5 (p<0.001) | 13                                                                                             | 4339                  | 93880                                    | 6.4 [4.7-8.1]                                                            | 99.6 (p<0.001) |
| Poorly-defined population           | 9                                                           | 7491                  | 110491                                   | 6.0 [3.1-8.9]                                                            | 99.8 (p<0.001) | 9                                                                                              | 7993                  | 110491                                   | 6.4 [3.2-9.6]                                                            | 99.9 (p<0.001) |
| <b>Eastern Mediterranean Region</b> |                                                             |                       |                                          |                                                                          |                |                                                                                                |                       |                                          |                                                                          |                |
| General population                  | 3                                                           | 691                   | 6062                                     | 13.4 [8.8-18.0]                                                          | 97.8 (p<0.001) | 3                                                                                              | 850                   | 6062                                     | 15.5 [10.8-20.3]                                                         | 95.9 (p<0.001) |
| Poorly-defined population           | 1                                                           | 691                   | 5372                                     | 12.9 [12.0-13.8]                                                         | -              | 1                                                                                              | 967                   | 5372                                     | 18.0 [17.0-19.0]                                                         | -              |
| <b>European Region</b>              |                                                             |                       |                                          |                                                                          |                |                                                                                                |                       |                                          |                                                                          |                |
| Close contact                       | 1                                                           | 195                   | 1084                                     | 18.0 [15.7-20.3]                                                         | -              | 1                                                                                              | 175                   | 1084                                     | 16.1 [14.0-18.3]                                                         | -              |
| Low-risk HCWs                       | 4                                                           | 935                   | 31666                                    | 4.5 [2.3-6.7]                                                            | 95.3 (p<0.001) | 4                                                                                              | 962                   | 31666                                    | 5.0 [2.4-7.5]                                                            | 96.2 (p<0.001) |
| General population                  | 14                                                          | 21988                 | 465929                                   | 4.7 [3.6-5.9]                                                            | 99.5 (p<0.001) | 14                                                                                             | 23728                 | 465929                                   | 5.4 [4.0-6.8]                                                            | 99.7 (p<0.001) |

|                           |    |       |        |                 |                 |    |       |        |                 |                 |
|---------------------------|----|-------|--------|-----------------|-----------------|----|-------|--------|-----------------|-----------------|
| Poorly-defined population | 19 | 4561  | 131977 | 4.4 [3.4-5.3]   | 99.4 (p<0.001)  | 19 | 4305  | 131977 | 4.0 [3.2-4.7]   | 99.6 (p<0.001)  |
| South-East Asia Region    |    |       |        |                 |                 |    |       |        |                 |                 |
| Low-risk HCWs             | 2  | 1     | 1075   | 0.1 [0.0-0.3]   | 0.0 (p=0.520)   | 2  | 1     | 1075   | 0.1 [0.0-0.3]   | -               |
| General population        | 4  | 18518 | 111456 | 19.6 [5.5-33.6] | 100.0 (p<0.001) | 4  | 17369 | 111456 | 18.6 [6.6-30.7] | 100.0 (p<0.001) |
| Poorly-defined population | 2  | 43    | 394    | 10.0 [0.0-28.9] | 97.9 (p<0.001)  | 2  | 50    | 394    | 11.7 [0.0-33.8] | 98.3 (p<0.001)  |
| Western Pacific Region    |    |       |        |                 |                 |    |       |        |                 |                 |
| High-risk HCWs            | 1  | 18    | 105    | 17.1 [9.9-24.4] | -               | 1  | 18    | 105    | 17.1 [9.9-24.4] | -               |
| Low-risk HCWs             | 1  | 1     | 432    | 0.2 [0.0-0.7]   | -               | 1  | 2     | 432    | 0.5 [0.0-1.1]   | -               |
| General population        | 2  | 627   | 20896  | 1.7 [0.0-5.0]   | 99.8 (p<0.001)  | 2  | 312   | 20896  | 0.8 [0.0-2.5]   | 99.6 (p<0.001)  |
| Poorly-defined population | 4  | 119   | 21365  | 0.9 [0.0-1.9]   | 96.9 (p<0.001)  | 4  | 130   | 21365  | 1.0 [0.0-2.2]   | 97.7 (p<0.001)  |

**Table S12. Multivariable meta-regression for change in the seroprevalence of human antibodies to SARS-CoV-2 among eighty-two grade A and grade B studies**

| Study characteristics        | Change in the seroprevalence (coefficient $\beta^\dagger$ ) (95% CI) |
|------------------------------|----------------------------------------------------------------------|
| <b>WHO regions</b>           |                                                                      |
| African Region               | 1                                                                    |
| Region of the Americas       | -6.2 (-16.0, 3.6)                                                    |
| Eastern Mediterranean Region | 2.3 (-10.0, 14.6)                                                    |
| European Region              | -7.6 (-17.3, 2.0)                                                    |
| South-East Asia Region       | 1.5 (-9.0, 12.0)                                                     |
| Western Pacific Region       | -11.6 (-22.6, -0.6)*                                                 |
| <b>Study populations</b>     |                                                                      |
| High-risk healthcare worker  | 1                                                                    |
| Close contact                | -1.4 (-24.0, 21.3)                                                   |
| Low-risk healthcare worker   | -17.7 (-35.1, -0.3)*                                                 |
| General population           | -12.6 (-29.8, 4.6)                                                   |
| Poorly-defined group         | -15.6 (-32.6, 1.5)                                                   |
| <b>Study quality</b>         |                                                                      |
| Grade A                      | 1                                                                    |
| Grade B                      | 4.4 (-0.2, 8.9)                                                      |
| <b>Test performance*</b>     |                                                                      |
| Sensitivity                  | 0.0 (-0.2, 0.2)                                                      |
| Specificity                  | 0.7 (-0.7, 2.0)                                                      |

\*\*\*  $p < 0.001$ ; \*\* $0.001 < p < 0.01$ ; \* $0.01 < p < 0.05$ .

† The regression coefficient  $\beta$  refers to the change in the seroprevalence of human antibodies to SARS-CoV-2. A negative sign for the coefficient  $\beta$  corresponds to a reduction in the seroprevalence of SARS-CoV-2 specific antibodies for given changes in the covariate, while a positive sign corresponds to an increase in the seroprevalence of SARS-CoV-2 specific antibodies.

\* The sensitivity and specificity were included in regression model as continuous variables, which indicated the change in the seroprevalence for per unit (%) of sensitivity and specificity.



**Table S13. Relative risk of infections with SARS-CoV-2 by age groups and sex among eighty-two grade A and grade B studies**

| Categories                    | Relative risk (RR, 95% CI) |
|-------------------------------|----------------------------|
| <b>Overall</b>                |                            |
| Age group†                    |                            |
| Young                         | 0.777 (0.718-0.842)*       |
| Middle-age                    | Ref                        |
| Old                           | 0.755 (0.591-0.964)*       |
| Sex                           |                            |
| Female                        | Ref                        |
| Male                          | 1.022 (0.955-1.093)        |
| Race                          |                            |
| White                         | Ref                        |
| Black                         | 2.701 (2.295-3.178)*       |
| Asian                         | 1.917 (1.815-2.025)*       |
| <b>Region of the Americas</b> |                            |
| Age group†                    |                            |
| Young                         | 0.718 (0.595-0.867)*       |
| Middle-age                    | Ref                        |
| Old                           | 0.787 (0.657-0.942)*       |
| Sex                           |                            |
| Female                        | Ref                        |
| Male                          | 0.991 (0.848-1.159)        |
| Race                          |                            |
| White                         | Ref                        |
| Black                         | 2.643 (1.920-3.637)*       |
| Asian                         | 1.781 (1.471-2.158)*       |
| <b>European Region</b>        |                            |
| Age group†                    |                            |
| Young                         | 0.790 (0.699-0.893)*       |
| Middle-age                    | Ref                        |
| Old                           | 0.713 (0.499-1.020)        |
| Sex                           |                            |
| Female                        | Ref                        |
| Male                          | 1.000 (0.934-1.070)        |
| Race                          |                            |
| White                         | Ref                        |
| Black                         | 2.743 (2.497-3.014)*       |
| Asian                         | 1.929 (1.822-2.043)*       |

\* p<0.05

† The age groups between each study were not perfectly aligned. Specially, the Young represent participants younger than 20 years, while the old represent



participants older than 65 years. The Middle-age group represent participants aged 20-64 years.

**Table S14. The cumulative incidence and estimated number of serological infections of selected grade A and grade B studies involved of general population**

| Author                          | Location, Country                                         | Age of participants | Unadjusted seroprevalence (%)<br>(a) | Adjusted seroprevalence (%)<br>(factors)<br>(a') * | Total population<br>(b) | Age proportion for population (%)<br>(c) | Age-specific population<br>(d = b*c) | Date in 14 days before mid-term sampling time | Total number of COVID-19 cases<br>(e) | Infections<br>(a*b/a'*b) |
|---------------------------------|-----------------------------------------------------------|---------------------|--------------------------------------|----------------------------------------------------|-------------------------|------------------------------------------|--------------------------------------|-----------------------------------------------|---------------------------------------|--------------------------|
| <b>Region of the Americas</b>   |                                                           |                     |                                      |                                                    |                         |                                          |                                      |                                               |                                       |                          |
| Hallal et al.                   | Brazil                                                    | ≥ 1 yrs             | 1.96                                 | -                                                  | 213863051               | 98.7                                     | 211108455                            | 2020/5/12                                     | 178214                                | 4135180.0                |
| Biggs et al. ‡                  | DeKalb, Fulton County, Georgia, USA                       | All ages            | 2.7                                  | 2.5                                                | 1806672                 | 100                                      | 1806672                              | 2020/4/16                                     | 3176                                  | 45166.8                  |
| Appa et al. †                   | Marin, California, USA                                    | ≥ 4 yrs             | 0.5                                  | 0.29                                               | 258826                  | 95.5                                     | 247179                               | 2020/4/8                                      | 148                                   | 716.8                    |
| Mahajan et al. †                | Connecticut, USA                                          | ≥ 18 yrs            | 4.1                                  | 4.0                                                | 3565287                 | 76.7                                     | 2734575                              | 2020/6/20                                     | 45715                                 | 109383.0                 |
| Bruckner et al.                 | Orange, California, USA                                   | ≥ 18 yrs            | 11.8                                 | 11.5                                               | 3175692                 | 78.3                                     | 2486567                              | 2020/7/14                                     | 26120                                 | 285955.2                 |
| Samore et al. ‡†                | Four counties (Utah, Salt Lake, Davis, Summit), Utah, USA | ≥ 12 yrs            | 1.1                                  | 0.8                                                | 2200000                 | 75.2                                     | 1654400                              | 2020/5/18                                     | 6233                                  | 13235.2                  |
| McLaughlin et al. ‡             | Blaine, Idaho, USA                                        | ≥ 18 yrs            | 22.7                                 | 22.9                                               | -                       | -                                        | 17611                                | 2020/4/27                                     | 492                                   | 4032.9                   |
| <b>European Region</b>          |                                                           |                     |                                      |                                                    |                         |                                          |                                      |                                               |                                       |                          |
| Petersen et al. ‡               | Faroe Islands, Denmark                                    | All ages            | 0.6                                  | 0.7                                                | 52154                   | 100                                      | 52154                                | 2020/4/15                                     | 184                                   | 365.1                    |
| Pollán et al. ¶                 | Spain                                                     | All ages            | 4.6                                  | -                                                  | 46459218                | 100                                      | 46459218                             | 2020/4/20                                     | 200210                                | 2137063.2                |
| Stringhini et al.               | Geneva, Switzerland                                       | ≥ 5 yrs             | 7.9                                  | -                                                  | 504128                  | 94.8                                     | 477810                               | 2020/4/8                                      | 4239                                  | 37830.9                  |
| Richard et al.                  | Geneva, Switzerland                                       | ≥ 5 yrs             | 6.6                                  | -                                                  | 504128                  | 94.8                                     | 477810                               | 2020/5/22                                     | 5212                                  | 31756.7                  |
| Ward et al. ‡                   | England, UK                                               | ≥ 18 yrs            | 4.8                                  | -                                                  | 56286961                | 78.6                                     | 44241551                             | 2020/7/26                                     | 257859                                | 2129775.4                |
| Office of National Statistics.‡ | England, UK                                               | ≥ 16 yrs            | 5.1                                  | 6.2                                                | -                       | -                                        | 45042000                             | 2020/6/18                                     | 158078                                | 2791800.0                |
| Government of Jersey            | Jersey, UK                                                | ≥ 16 yrs            | 2.9                                  | 3.1                                                | -                       | -                                        | -                                    | 2020/4/18                                     | 245                                   | 3300.0                   |
| Streeck et al. ‡§               | Gangelt, Kreis Heinsberg, Germany                         | All ages            | 11.5                                 | 14.1                                               | 12597                   | 100                                      | 12597                                | 2020/3/20                                     | 439                                   | 1777.4                   |

|                                 |                          |          |      |      |          |      |          |           |         |            |
|---------------------------------|--------------------------|----------|------|------|----------|------|----------|-----------|---------|------------|
| Snoeck et al. †                 | Luxembourg               | ≥ 18 yrs | 1.9  | 2.09 | 603951   | -    | 469709   | 2020/4/11 | 3270    | 9816.9     |
| Barchuk et al. †                | Saint Petersburg, Russia | ≥ 18 yrs | 9.3  | 7.4  | 5351935  | 83.2 | 4452810  | 2020/5/28 | 14839   | 329508.0   |
| Vos et al. †                    | Netherlands              | 2-90 yrs | 2.4  | -    | 17181252 | 100  | 17181252 | 2020/4/6  | 18803   | 410133.1   |
| <b>South-East Asia Region</b>   |                          |          |      |      |          |      |          |           |         |            |
| Malani et al. †                 | Mumbai, India            | ≥ 12 yrs | 40.8 | -    | 20411274 | 77.9 | 15890177 | 2020/6/25 | 70878   | 6488182.0  |
| Murhekar et al.<br>(round 1) †† | India                    | ≥ 18 yrs | 0.56 | 0.73 |          |      |          | 2020/5/9  | 62808   | 6468388.0  |
| Murhekar et al.<br>(round 2) †‡ | India                    | ≥ 10 yrs | 10.8 | 6.6  | -        | -    |          | 2020/8/21 | 2975701 | 74326463.0 |
| Sharma et al. †                 | Delhi, India             | ≥ 5 yrs  | 26.1 | -    | 30290936 | 91.8 | 27797992 | 2020/8/27 | 167604  | 7265424.2  |

\* Adjust factors mainly include demographic factors (age and/or sex) and test performance (sensitivity and specificity of assays).

†† We aggregated the multiple sampling results to calculate the crude estimated during the whole study period, and adjusted seroprevalence could not be calculated. Stringhini et al. reported the data from the first five weeks; Richard et al. reported the data from week 6 to week 12.

‡ The estimated number of infections or population size were reported in their own study.

††† The seroprevalence of immunoassay were used in main analysis

†††† The age proportion used to calculate population size in specific age groups were not perfectly aligned with the age group reported in original study.

§ The number of COVID-19 cases in the local as of Mar 30 were extracted in the original study to represent the cumulative number of cases as of Mar 20.

**Table S15. The data source of population size and COVID-19-related epidemiological data of grade A and grade B studies involved of general population**

| Author            | Location                                                  | Institution                             | Source of population                                                                                                                                                                                                                                                                                                                                                                                                                                                   | Institution                                                         | Source of epi-data                                                                                                                                                                                                                                                                                                                                                                                                                   |
|-------------------|-----------------------------------------------------------|-----------------------------------------|------------------------------------------------------------------------------------------------------------------------------------------------------------------------------------------------------------------------------------------------------------------------------------------------------------------------------------------------------------------------------------------------------------------------------------------------------------------------|---------------------------------------------------------------------|--------------------------------------------------------------------------------------------------------------------------------------------------------------------------------------------------------------------------------------------------------------------------------------------------------------------------------------------------------------------------------------------------------------------------------------|
| Hallal et al.     | Brazil                                                    | World pop                               | <a href="https://www.worldpop.org/">https://www.worldpop.org/</a>                                                                                                                                                                                                                                                                                                                                                                                                      | JHU CSSE COVID-19 Dashboard                                         | <a href="https://github.com/CSSEGISandData/COVID-19/tree/master/csse_covid_19_data/csse_covid_19_time_series">https://github.com/CSSEGISandData/COVID-19/tree/master/csse_covid_19_data/csse_covid_19_time_series</a>                                                                                                                                                                                                                |
| Biggs et al.      | Georgia, USA                                              | National Center for Health Statistics   | <a href="https://www.cdc.gov/nchs/nvss/bridged_race/data_documentation.htm#Vintage2018">https://www.cdc.gov/nchs/nvss/bridged_race/data_documentation.htm#Vintage2018</a> .                                                                                                                                                                                                                                                                                            | JHU CSSE COVID-19 Dashboard                                         | <a href="https://github.com/CSSEGISandData/COVID-19/tree/master/csse_covid_19_data/csse_covid_19_time_series">https://github.com/CSSEGISandData/COVID-19/tree/master/csse_covid_19_data/csse_covid_19_time_series</a>                                                                                                                                                                                                                |
| Appa et al.       | Marin, California, USA                                    | U.S. Census Bureau, Population Division | <a href="https://archive.vn/20200214061229/https://factfinder.census.gov/faces/tableservices/jsf/pages/procedureview.xhtml?pid=PEP_2018_PEPANNRES&amp;prodType=table">https://archive.vn/20200214061229/https://factfinder.census.gov/faces/tableservices/jsf/pages/procedureview.xhtml?pid=PEP_2018_PEPANNRES&amp;prodType=table</a><br><a href="https://www.census.gov/quickfacts/marincountycalifornia">https://www.census.gov/quickfacts/marincountycalifornia</a> | JHU CSSE COVID-19 Dashboard                                         | <a href="https://github.com/CSSEGISandData/COVID-19/tree/master/csse_covid_19_data/csse_covid_19_time_series">https://github.com/CSSEGISandData/COVID-19/tree/master/csse_covid_19_data/csse_covid_19_time_series</a>                                                                                                                                                                                                                |
| Mahajan et al.    | Connecticut, USA                                          | United State Census Bureau/ Statista    | <a href="https://www2.census.gov/programs-surveys/popest/tables/2010-2019/state/totals/nst-est2019-01.xlsx?#">https://www2.census.gov/programs-surveys/popest/tables/2010-2019/state/totals/nst-est2019-01.xlsx?#</a><br><a href="https://www.statista.com/statistics/1021891/connecticut-population-share-age-group/">https://www.statista.com/statistics/1021891/connecticut-population-share-age-group/</a>                                                         | JHU CSSE COVID-19 Dashboard/ Connecticut Open Data                  | <a href="https://github.com/CSSEGISandData/COVID-19/tree/master/csse_covid_19_data/csse_covid_19_time_series">https://github.com/CSSEGISandData/COVID-19/tree/master/csse_covid_19_data/csse_covid_19_time_series</a><br><a href="https://data.ct.gov/Health-and-Human-Services/COVID-19-Cases-and-Deaths-by-Age-Group/ypz6-8qvf">https://data.ct.gov/Health-and-Human-Services/COVID-19-Cases-and-Deaths-by-Age-Group/ypz6-8qvf</a> |
| Bruckner et al.   | Orange, California, USA                                   | U.S. Census Bureau                      | <a href="https://www.census.gov/quickfacts/orangecountycalifornia">https://www.census.gov/quickfacts/orangecountycalifornia</a>                                                                                                                                                                                                                                                                                                                                        | JHU CSSE COVID-19 Dashboard/ California Department of Public Health | <a href="https://github.com/CSSEGISandData/COVID-19/tree/master/csse_covid_19_data/csse_covid_19_time_series">https://github.com/CSSEGISandData/COVID-19/tree/master/csse_covid_19_data/csse_covid_19_time_series</a><br><a href="https://www.cdph.ca.gov/Programs/CID/DCDC/Pages/COVID-19/COVID-19-Cases-by-Age-Group.aspx">https://www.cdph.ca.gov/Programs/CID/DCDC/Pages/COVID-19/COVID-19-Cases-by-Age-Group.aspx</a>           |
| Samore et al.     | Four counties (Utah, Salt Lake, Davis, Summit), Utah, USA | Kem C Gardner Policy Institute          | <a href="https://gardner.utah.edu/wp-content/uploads/State-of-Utah-Demographic-Profile-2010-2018.pdf">https://gardner.utah.edu/wp-content/uploads/State-of-Utah-Demographic-Profile-2010-2018.pdf</a>                                                                                                                                                                                                                                                                  | JHU CSSE COVID-19 Dashboard/ Utah Department of Health              | <a href="https://github.com/CSSEGISandData/COVID-19/tree/master/csse_covid_19_data/csse_covid_19_time_series">https://github.com/CSSEGISandData/COVID-19/tree/master/csse_covid_19_data/csse_covid_19_time_series</a><br><a href="https://coronavirus-dashboard.utah.gov/#demographics">https://coronavirus-dashboard.utah.gov/#demographics</a>                                                                                     |
| McLaughlin et al. | Blaine, Idaho, USA                                        | United State Census Bureau              | <a href="https://www.census.gov/quickfacts/blainecountyidaho">https://www.census.gov/quickfacts/blainecountyidaho</a>                                                                                                                                                                                                                                                                                                                                                  | JHU CSSE COVID-19 Dashboard                                         | <a href="https://github.com/CSSEGISandData/COVID-19/tree/master/csse_covid_19_data/csse_covid_19_time_series">https://github.com/CSSEGISandData/COVID-19/tree/master/csse_covid_19_data/csse_covid_19_time_series</a>                                                                                                                                                                                                                |
| Petersen et al.   | Faroe Islands, Denmark                                    | STATBANK                                | <a href="https://statbank.hagstova.fo/pxweb/en/H2/H2_IB_IB01/fo_aldbygd.px/">https://statbank.hagstova.fo/pxweb/en/H2/H2_IB_IB01/fo_aldbygd.px/</a>                                                                                                                                                                                                                                                                                                                    | JHU CSSE COVID-19 Dashboard                                         | <a href="https://github.com/CSSEGISandData/COVID-19/tree/master/csse_covid_19_data/csse_covid_19_time_series">https://github.com/CSSEGISandData/COVID-19/tree/master/csse_covid_19_data/csse_covid_19_time_series</a>                                                                                                                                                                                                                |

|                                |                                   |                                |                                                                                                                                                                                                                                                                                                                                      |                                                       |                                                                                                                                                                                                                                                                                                                                                                                                                                                                                                                                                                                                                                                                                                                                                                                                                                                                                                                       |
|--------------------------------|-----------------------------------|--------------------------------|--------------------------------------------------------------------------------------------------------------------------------------------------------------------------------------------------------------------------------------------------------------------------------------------------------------------------------------|-------------------------------------------------------|-----------------------------------------------------------------------------------------------------------------------------------------------------------------------------------------------------------------------------------------------------------------------------------------------------------------------------------------------------------------------------------------------------------------------------------------------------------------------------------------------------------------------------------------------------------------------------------------------------------------------------------------------------------------------------------------------------------------------------------------------------------------------------------------------------------------------------------------------------------------------------------------------------------------------|
| Pollán et al.                  | Spain                             | World pop                      | <a href="https://www.worldpop.org/">https://www.worldpop.org/</a>                                                                                                                                                                                                                                                                    | JHU CSSE COVID-19 Dashboard                           | <a href="https://github.com/CSSEGISandData/COVID-19/tree/master/csse_covid_19_data/csse_covid_19_time_series">https://github.com/CSSEGISandData/COVID-19/tree/master/csse_covid_19_data/csse_covid_19_time_series</a>                                                                                                                                                                                                                                                                                                                                                                                                                                                                                                                                                                                                                                                                                                 |
| Stringhini et al.              | Geneva, Switzerland               | STAT-TAB                       | <a href="https://www.pxweb.bfs.admin.ch/pxweb/en/px-x-0103010000_101/-/px-x-0103010000_101.px/?rxid=34873e36-d320-4c20-b931-8f0596e0e667">https://www.pxweb.bfs.admin.ch/pxweb/en/px-x-0103010000_101/-/px-x-0103010000_101.px/?rxid=34873e36-d320-4c20-b931-8f0596e0e667</a>                                                        | Federal Office of Public Health                       | <a href="https://www.bag.admin.ch/dam/bag/en/dokumente/mt/k-und-i/aktuelle-ausbrueche-pandemien/2019-nCoV/covid-19-basisdaten-fallzahlen.xlsx.download.xlsx/Dashboards_1&amp;2_COVID19_swiss_data_pv.xlsx">https://www.bag.admin.ch/dam/bag/en/dokumente/mt/k-und-i/aktuelle-ausbrueche-pandemien/2019-nCoV/covid-19-basisdaten-fallzahlen.xlsx.download.xlsx/Dashboards_1&amp;2_COVID19_swiss_data_pv.xlsx</a>                                                                                                                                                                                                                                                                                                                                                                                                                                                                                                       |
| Richard et al.                 | Geneva, Switzerland               | STAT-TAB                       | <a href="https://www.pxweb.bfs.admin.ch/pxweb/en/px-x-0103010000_101/-/px-x-0103010000_101.px/?rxid=34873e36-d320-4c20-b931-8f0596e0e667">https://www.pxweb.bfs.admin.ch/pxweb/en/px-x-0103010000_101/-/px-x-0103010000_101.px/?rxid=34873e36-d320-4c20-b931-8f0596e0e667</a>                                                        | Federal Office of Public Health                       | <a href="https://www.bag.admin.ch/dam/bag/en/dokumente/mt/k-und-i/aktuelle-ausbrueche-pandemien/2019-nCoV/covid-19-basisdaten-fallzahlen.xlsx.download.xlsx/Dashboards_1&amp;2_COVID19_swiss_data_pv.xlsx">https://www.bag.admin.ch/dam/bag/en/dokumente/mt/k-und-i/aktuelle-ausbrueche-pandemien/2019-nCoV/covid-19-basisdaten-fallzahlen.xlsx.download.xlsx/Dashboards_1&amp;2_COVID19_swiss_data_pv.xlsx</a>                                                                                                                                                                                                                                                                                                                                                                                                                                                                                                       |
| Ward et al.                    | England, UK                       | Office for National Statistics | <a href="https://www.ons.gov.uk/peoplepopulationandcommunity/populationandmigration/populationestimates">https://www.ons.gov.uk/peoplepopulationandcommunity/populationandmigration/populationestimates</a>                                                                                                                          | Public Health England                                 | <a href="https://coronavirus.data.gov.uk/cases?areaType=nation&amp;areaName=England">https://coronavirus.data.gov.uk/cases?areaType=nation&amp;areaName=England</a>                                                                                                                                                                                                                                                                                                                                                                                                                                                                                                                                                                                                                                                                                                                                                   |
| Office of National Statistics. | England, UK                       | Office for National Statistics | <a href="https://www.ons.gov.uk/peoplepopulationandcommunity/populationandmigration/populationestimates">https://www.ons.gov.uk/peoplepopulationandcommunity/populationandmigration/populationestimates</a>                                                                                                                          | Public Health England                                 | <a href="https://coronavirus.data.gov.uk/cases?areaType=nation&amp;areaName=England">https://coronavirus.data.gov.uk/cases?areaType=nation&amp;areaName=England</a>                                                                                                                                                                                                                                                                                                                                                                                                                                                                                                                                                                                                                                                                                                                                                   |
| Government of Jersey           | Jersey, UK                        | -                              | -                                                                                                                                                                                                                                                                                                                                    | Government of Jersey                                  | <a href="https://www.gov.je/health/coronavirus/pages/coronaviruscases.aspx">https://www.gov.je/health/coronavirus/pages/coronaviruscases.aspx</a>                                                                                                                                                                                                                                                                                                                                                                                                                                                                                                                                                                                                                                                                                                                                                                     |
| Streeck et al.                 | Gangelt, Kreis Heinsberg, Germany | -                              | Streeck et al. Infection fatality rate of SARS-CoV-2 infection in a German community with a super-spreading event. medRxiv. <a href="https://doi.org/10.1101/2020.05.11.20092916">https://doi.org/10.1101/2020.05.11.20092916</a>                                                                                                    | -                                                     | Streeck et al. Infection fatality rate of SARS-CoV-2 infection in a German community with a super-spreading event. medRxiv. <a href="https://doi.org/10.1101/2020.05.11.20092916">https://doi.org/10.1101/2020.05.11.20092916</a>                                                                                                                                                                                                                                                                                                                                                                                                                                                                                                                                                                                                                                                                                     |
| Snoeck et al.                  | Luxembourg                        | World pop                      | <a href="https://www.worldpop.org/">https://www.worldpop.org/</a>                                                                                                                                                                                                                                                                    | JHU CSSE COVID-19 Dashboard/The Luxembourg government | <a href="https://github.com/CSSEGISandData/COVID-19/tree/master/csse_covid_19_data/csse_covid_19_time_series">https://github.com/CSSEGISandData/COVID-19/tree/master/csse_covid_19_data/csse_covid_19_time_series</a><br><a href="https://msan.gouvernement.lu/fr/graphiques-evolution.html">https://msan.gouvernement.lu/fr/graphiques-evolution.html</a>                                                                                                                                                                                                                                                                                                                                                                                                                                                                                                                                                            |
| Barchuk et al.                 | Saint Petersburg, Russia          | -                              | <a href="https://rosstat.gov.ru/free_doc/new_site/population/demo/Popul2018.xls">https://rosstat.gov.ru/free_doc/new_site/population/demo/Popul2018.xls</a><br><a href="https://populationandconomics.pensoft.net/article/47234/download/pdf/349836">https://populationandconomics.pensoft.net/article/47234/download/pdf/349836</a> | Multiple sources                                      | <a href="https://cn.bing.com/search?q=Coronavirus+trend+in+St+Petersburg+City&amp;tf=U2VydmljZT1HZW5lcmljOW5zd2VycyBTY2VuYXljb31Db3ljbWFWaXl1c01MlFBvc2l0aW9uPVRPUCBSYW5raW5nRGF0YT1UcnVlIEZvcmluIGxhY2U9VHJ1ZSBQYWlycz1zY246Q29yb25hVmlldXNNTDtjb3VudHI5Q29kZTpSVVM7c3RhdGVDb2RlOIN0ITlwUGV0ZXJzYnVyZyUyMENpdHk7aW50ZW50OkNoZWNrQ29yb25hVHllbmQ7YWJvdmVuZXZxd0IRydwU7IHw%3d&amp;hs=kl3jO5C%2fFDZhlIVfw%2fmpk9X%2b%2fTFYSn%2blfwOZGekQYnM%3d&amp;FORM=COVIDR">https://cn.bing.com/search?q=Coronavirus+trend+in+St+Petersburg+City&amp;tf=U2VydmljZT1HZW5lcmljOW5zd2VycyBTY2VuYXljb31Db3ljbWFWaXl1c01MlFBvc2l0aW9uPVRPUCBSYW5raW5nRGF0YT1UcnVlIEZvcmluIGxhY2U9VHJ1ZSBQYWlycz1zY246Q29yb25hVmlldXNNTDtjb3VudHI5Q29kZTpSVVM7c3RhdGVDb2RlOIN0ITlwUGV0ZXJzYnVyZyUyMENpdHk7aW50ZW50OkNoZWNrQ29yb25hVHllbmQ7YWJvdmVuZXZxd0IRydwU7IHw%3d&amp;hs=kl3jO5C%2fFDZhlIVfw%2fmpk9X%2b%2fTFYSn%2blfwOZGekQYnM%3d&amp;FORM=COVIDR</a> |
| Vos et al.                     | Netherlands                       | World pop                      | <a href="https://www.worldpop.org/">https://www.worldpop.org/</a>                                                                                                                                                                                                                                                                    | JHU CSSE COVID-19 Dashboard                           | <a href="https://github.com/CSSEGISandData/COVID-19/tree/master/csse_covid_19_data/csse_covid_19_time_series">https://github.com/CSSEGISandData/COVID-19/tree/master/csse_covid_19_data/csse_covid_19_time_series</a>                                                                                                                                                                                                                                                                                                                                                                                                                                                                                                                                                                                                                                                                                                 |

|                 |               |           |                                                                                                                                               |                             |                                                                                                                                                                                                                                                                                                                                                                                                                                                                                                                                                                                                                                                                                                                                                                                                                       |
|-----------------|---------------|-----------|-----------------------------------------------------------------------------------------------------------------------------------------------|-----------------------------|-----------------------------------------------------------------------------------------------------------------------------------------------------------------------------------------------------------------------------------------------------------------------------------------------------------------------------------------------------------------------------------------------------------------------------------------------------------------------------------------------------------------------------------------------------------------------------------------------------------------------------------------------------------------------------------------------------------------------------------------------------------------------------------------------------------------------|
| Malani et al.   | Mumbai, India | UN        | <a href="http://www.populationu.com/cities/mumbai-population">http://www.populationu.com/cities/mumbai-population</a>                         | News report                 | <a href="https://www.google.com/amp/s/m.hindustantimes.com/india-news/are-coronavirus-cases-in-mumbai-plateauing/story-tDo9h8IcE0BXVSuwYjOxxJ_amp.html">https://www.google.com/amp/s/m.hindustantimes.com/india-news/are-coronavirus-cases-in-mumbai-plateauing/story-tDo9h8IcE0BXVSuwYjOxxJ_amp.html</a>                                                                                                                                                                                                                                                                                                                                                                                                                                                                                                             |
| Murhekar et al. | India         | World pop | <a href="https://www.worldpop.org/">https://www.worldpop.org/</a>                                                                             | JHU CSSE COVID-19 Dashboard | <a href="https://github.com/CSSEGISandData/COVID-19/tree/master/csse_covid_19_data/csse_covid_19_time_series">https://github.com/CSSEGISandData/COVID-19/tree/master/csse_covid_19_data/csse_covid_19_time_series</a>                                                                                                                                                                                                                                                                                                                                                                                                                                                                                                                                                                                                 |
| Sharma et al.   | Delhi, India  | -         | <a href="https://worldpopulationreview.com/world-cities/delhi-population">https://worldpopulationreview.com/world-cities/delhi-population</a> | Multiple sources            | <a href="https://cn.bing.com/search?q=Coronavirus+trend+in+Maharashtra&amp;tf=U2VydmJlZT1HZW5lcmljQW5zd2VycyBTY2VuYXJpbz1Db3JvbmFWaXJ1c01MIFBvc2l0aW9uPVRPUCBSYW5raW5nRGF0YT1UcnVlIEZvcnNIUGxhY2U9VHJ1ZSBQYWlycz1zY246Q29yb25hVmlydXNNTDtb3VudHJ5Q29kZTJpJTkQ7c3RhdGVDb2RlOk1lO2ludGVudDpDaGVja0Nvcn9uYVRyZW5kO2Fib3ZlbnV3czpUcnVlOyB8&amp;hs=WARPquqWriUvRyVXy7sza4FF3FR7Qb0ftF6qFU4LGV4%3d&amp;FORM=COVIDR">https://cn.bing.com/search?q=Coronavirus+trend+in+Maharashtra&amp;tf=U2VydmJlZT1HZW5lcmljQW5zd2VycyBTY2VuYXJpbz1Db3JvbmFWaXJ1c01MIFBvc2l0aW9uPVRPUCBSYW5raW5nRGF0YT1UcnVlIEZvcnNIUGxhY2U9VHJ1ZSBQYWlycz1zY246Q29yb25hVmlydXNNTDtb3VudHJ5Q29kZTJpJTkQ7c3RhdGVDb2RlOk1lO2ludGVudDpDaGVja0Nvcn9uYVRyZW5kO2Fib3ZlbnV3czpUcnVlOyB8&amp;hs=WARPquqWriUvRyVXy7sza4FF3FR7Qb0ftF6qFU4LGV4%3d&amp;FORM=COVIDR</a> |

**Table S16. Sensitivity and specificity values used in the sensitivity analysis of seroprevalence adjusted for test performance**

| Author              | Study population                              | Screening assay       | Sen (%) | Spe (%) | Confirmatory assay | Sen (%) | Spe (%) | Combined Sen (%) | Combined Spe (%) | Data Source                                               |
|---------------------|-----------------------------------------------|-----------------------|---------|---------|--------------------|---------|---------|------------------|------------------|-----------------------------------------------------------|
| Brotons et al.      | Close contact                                 | LFIA                  | 100.0   | 97.5    | -                  | -       | -       | -                | -                | US. FDA <sup>91</sup>                                     |
| Tess et al.         | General population                            | CLIA                  | 92.1    | 99.1    | -                  | -       | -       | -                | -                | US. FDA <sup>91</sup>                                     |
| Stringhini et al.   | General population                            | ELISA                 | 93.0    | 100.0   | -                  | -       | -       | -                | -                | Internal validation <sup>47</sup>                         |
| Snoeck et al.       | General population                            | ELISA                 | 77.8    | 97.8    | -                  | -       | -       | -                | -                | Internal validation <sup>56</sup>                         |
| Pollán et al..      | General population                            | CLIA                  | 88.6    | 100.0   | -                  | -       | -       | -                | -                | Internal validation <sup>57</sup>                         |
| Biggs et al.        | General population                            | CLIA                  | 93.2    | 99.0    | -                  | -       | -       | -                | -                | Internal validation <sup>28</sup>                         |
| Majiya et al.       | General population                            | LFIA                  | 100.0   | 100.0   | -                  | -       | -       | -                | -                | Internal validation <sup>10</sup>                         |
| Gudbjartsson et al. | General population, Poorly-defined population | CLIA/ELISA            | 91.2    | 99.8    | -                  | -       | -       | -                | -                | Internal validation <sup>50</sup>                         |
| Nisar et al.        | General population                            | CLIA                  | 80.0    | 100.0   | -                  | -       | -       | -                | -                | Internal validation <sup>39</sup>                         |
| Borges et al.       | General population                            | LFIA                  | 95.8    | 97.0    | -                  | -       | -       | -                | -                | Internal validation <sup>21</sup>                         |
| Mahajan et al.      | General population                            | CLIA                  | 94.4    | 100.0   | -                  | -       | -       | -                | -                | Internal validation <sup>23</sup> / US. FDA <sup>91</sup> |
| Vos et al.          | General population                            | Multiplex-immunoassay | 84.4    | 99.0    | -                  | -       | -       | -                | -                | External validation <sup>92</sup>                         |
| Richard et al.      | General population                            | ELISA                 | 93.0    | 100.0   | -                  | -       | -       | -                | -                | Internal validation <sup>47,48</sup>                      |
| Basteiro et al.     | Low-risk Healthcare worker                    | CLIA                  | 96.9    | 100.0   | -                  | -       | -       | -                | -                | Internal validation <sup>45</sup>                         |

|                       |                                                       |                             |      |       |    |     |     |      |       |                                   |
|-----------------------|-------------------------------------------------------|-----------------------------|------|-------|----|-----|-----|------|-------|-----------------------------------|
| Nopsopon et al.       | Low-risk Healthcare worker, Poorly-defined population | LFIA                        | 94.1 | 98.0  | -  | -   | -   | -    | -     | Internal validation <sup>77</sup> |
| Moscola et al. *      | Low-risk Healthcare worker                            | ELISA/CLIA/<br>Immunometric | 87.3 | 99.4  | -  | -   | -   | -    | -     | Internal validation <sup>16</sup> |
| Self et al.           | Low-risk Healthcare worker                            | ELISA                       | 96.0 | 99.0  | -  | -   | -   | -    | -     | Internal validation <sup>12</sup> |
| Ariza et al.          | Low-risk Healthcare worker                            | CLIA                        | 89.3 | 99.6  | -  | -   | -   | -    | -     | US. FDA <sup>91</sup>             |
| Brant-Zawadzki et al. | Low-risk Healthcare worker                            | CLIA                        | 93.6 | 100.0 | -  | -   | -   | -    | -     | Internal validation <sup>14</sup> |
| Laursen et al.        | Low-risk Healthcare worker, Poorly-defined population | LFIA                        | 82.6 | 99.5  | -  | -   | -   | -    | -     | Internal validation <sup>43</sup> |
| Trieu et al.          | Low-risk Healthcare worker                            | ELISA                       | 92.5 | 100.0 | NT | 100 | 100 | 92.5 | 100.0 | US. FDA <sup>91</sup>             |
| Ko et al.             | Low-risk Healthcare worker                            | FIA                         | 99.1 | 94.1  | NT | 100 | 100 | 99.1 | 100.0 | Internal validation <sup>84</sup> |
| Skowronski et al.     | Poorly-defined population                             | CLIA                        | 85.0 | 100.0 | -  | -   | -   | -    | -     | Internal validation <sup>36</sup> |
| Iversen et al.        | Poorly-defined population                             | LFIA                        | 82.5 | 99.5  | -  | -   | -   | -    | -     | Internal validation <sup>42</sup> |
| Xu et al.             | Poorly-defined population                             | CLIA                        | 83.0 | 100.0 | -  | -   | -   | -    | -     | Internal validation <sup>90</sup> |
| Plebani et al.        | Poorly-defined population                             | CLIA                        | 73.4 | 98.0  | -  | -   | -   | -    | -     | Internal validation <sup>75</sup> |
| Ray et al.            | Poorly-defined population                             | ELISA                       | 88.2 | 99.8  | -  | -   | -   | -    | -     | Internal validation <sup>82</sup> |
| Tilley et al.         | Poorly-defined population                             | ELISA                       | 90.0 | 100.0 | -  | -   | -   | -    | -     | US. FDA <sup>91</sup>             |



|                   |                           |                                          |      |       |       |      |      |      |       |                                                              |
|-------------------|---------------------------|------------------------------------------|------|-------|-------|------|------|------|-------|--------------------------------------------------------------|
| Dimeglio et al.   | Poorly-defined population | ELISA                                    | 96.7 | 97.5  | NT    | 100  | 100  | 96.7 | 100.0 | US. FDA <sup>91</sup>                                        |
| Dillner et al.    | Poorly-defined population | multiplex,<br>microsphere-based<br>assay | 99.2 | 99.8  | -     | -    | -    | -    | -     | Internal validation <sup>62,93</sup>                         |
| Stadlbauer et al. | Poorly-defined population | ELISA                                    | 95.0 | 100.0 | -     | -    | -    | -    | -     | Internal validation <sup>33</sup>                            |
| Slot et al.       | Poorly-defined population | ELISA                                    | 98.3 | 99.4  | ELISA | 98.3 | 99.4 | 96.6 | 100.0 | Internal validation <sup>67</sup>                            |
| Jögi et al.       | Poorly-defined population | CLIA                                     | 92.7 | 99.9  | NT    | 100  | 100  | 92.7 | 100.0 | PHE <sup>94</sup>                                            |
| Ho et al.         | Poorly-defined population | CLIA                                     | 82.5 | 99.8  | ELISA | 100  | 100  | 82.5 | 100.0 | US. FDA <sup>88</sup> / Internal<br>validation <sup>88</sup> |
| Berte et al.      | Poorly-defined population | ELISA                                    | 97.6 | 95.2  | -     | -    | -    | -    | -     | Internal validation <sup>69</sup>                            |

Abbreviation: sen, sensitivity; spe, specificity; LFIA, lateral flow immunoassays; CLIA, chemiluminescence immunoassays; ELISA, enzyme-linked immunosorbent assays; FIA, fluorescence immunoassay; US. FDA, US Food and Drug Administration; PHE: Public Health England; NT, neutralization test.

\* Average sensitivity and specificity from a total of seven serological assays were used.

|| An overall sensitivity of 85% and perfect specificity were assumed according to original study.

**Table S17. Estimated seroprevalence of antibodies to SARS-CoV-2 by WHO regions and study populations among all 404 studies**

| Study population                    | All infections |                       |                                          |                                                    |                    | Symptomatic infections |                       |                                          |                                                    |                    | Asymptomatic infections |                       |                                          |                                                    |                    |
|-------------------------------------|----------------|-----------------------|------------------------------------------|----------------------------------------------------|--------------------|------------------------|-----------------------|------------------------------------------|----------------------------------------------------|--------------------|-------------------------|-----------------------|------------------------------------------|----------------------------------------------------|--------------------|
|                                     | No. of studies | Total no. of positive | Total no. of participants provided serum | Estimated seroprevalence (95% confidence interval) | I <sup>2</sup> (P) | No. of studies         | Total no. of positive | Total no. of participants provided serum | Estimated seroprevalence (95% confidence interval) | I <sup>2</sup> (P) | No. of studies          | Total no. of positive | Total no. of participants provided serum | Estimated seroprevalence (95% confidence interval) | I <sup>2</sup> (P) |
| <b>Overall</b>                      |                |                       |                                          |                                                    |                    |                        |                       |                                          |                                                    |                    |                         |                       |                                          |                                                    |                    |
| Close contacts                      | 22             | 3515                  | 12609                                    | 26.6 [18.3-35.0]                                   | 99.5 (p<0.001)     | 11                     | 290                   | 2613                                     | 10.1 [5.6-14.7]                                    | 96.6 (p<0.001)     | 11                      | 222                   | 2613                                     | 9.5 [5.0-14.0]                                     | 96.7 (p<0.001)     |
| High-risk HCWs                      | 16             | 1073                  | 7508                                     | 18.7 [12.3-25.1]                                   | 98.3 (p<0.001)     | 8                      | 201                   | 2201                                     | 5.1 [1.6-8.6]                                      | 96.6 (p<0.001)     | 8                       | 306                   | 2201                                     | 11.0 [4.9-17.1]                                    | 96.7 (p<0.001)     |
| Low-risk HCWs                       | 115            | 20682                 | 293318                                   | 6.1 [5.4-6.7]                                      | 99.4 (p<0.001)     | 58                     | 3630                  | 115691                                   | 0.9 [0.8-1.0]                                      | 98.6 (p<0.001)     | 58                      | 3992                  | 115691                                   | 2.3 [1.8-2.8]                                      | 98.2 (p<0.001)     |
| General population                  | 84             | 70674                 | 1078010                                  | 8.4 [7.6-9.1]                                      | 99.9 (p<0.001)     | 32                     | 16211                 | 606867                                   | 1.6 [1.4-1.8]                                      | 99.8 (p<0.001)     | 32                      | 16065                 | 606867                                   | 2.9 [2.4-3.5]                                      | 99.7 (p<0.001)     |
| Poorly-defined population           | 209            | 378410                | 3776915                                  | 8.1 [7.4-8.8]                                      | 99.9 (p<0.001)     | 74                     | 4114                  | 305026                                   | 0.2 [0.1-0.2]                                      | 98.9 (p<0.001)     | 74                      | 12531                 | 305026                                   | 4.7 [4.1-5.2]                                      | 99.3 (p<0.001)     |
| <b>African Region</b>               |                |                       |                                          |                                                    |                    |                        |                       |                                          |                                                    |                    |                         |                       |                                          |                                                    |                    |
| Close contacts                      | 0              | -                     | -                                        | -                                                  | -                  | 0                      | -                     | -                                        | -                                                  | -                  | 0                       | -                     | -                                        | -                                                  | -                  |
| High-risk HCWs                      | 1              | 60                    | 133                                      | 45.1 [36.7-53.6]                                   | -                  | 1                      | 0                     | 133                                      | 0.0 [0.0-1.0]                                      | -                  | 1                       | 60                    | 133                                      | 45.1 [36.7-53.6]                                   | -                  |
| Low-risk HCWs                       | 1              | 5                     | 370                                      | 1.4 [0.2-2.5]                                      | -                  | 1                      | 2                     | 370                                      | 0.5 [0.0-1.3]                                      | -                  | 1                       | 6                     | 370                                      | 1.6 [0.3-2.9]                                      | -                  |
| General population                  | 3              | 73                    | 585                                      | 11.6 [1.7-21.5]                                    | 94.7 (p<0.001)     | 2                      | 26                    | 284                                      | 7.0 [0.0-19.3]                                     | 95.3 (p<0.001)     | 2                       | 24                    | 284                                      | 6.8 [0.0-16.4]                                     | 92.1 (p<0.001)     |
| Poorly-defined population           | 4              | 278                   | 4249                                     | 9.8 [4.6-14.9]                                     | 98.5 (p<0.001)     | 2                      | 2                     | 1085                                     | 0.1 [0.0-0.4]                                      | 33.1 (p=0.221)     | 2                       | 90                    | 1085                                     | 8.8 [0.0-24.3]                                     | 98.8 (p<0.001)     |
| <b>Region of the Americas</b>       |                |                       |                                          |                                                    |                    |                        |                       |                                          |                                                    |                    |                         |                       |                                          |                                                    |                    |
| Close contacts                      | 8              | 499                   | 4240                                     | 19.5 [8.8-30.3]                                    | 99.0 (p<0.001)     | 5                      | 198                   | 1700                                     | 8.1 [0.0-17.2]                                     | 95.9 (p<0.001)     | 5                       | 74                    | 1700                                     | 3.1 [0.4-5.7]                                      | 69.3 (p=0.011)     |
| High-risk HCWs                      | 3              | 46                    | 512                                      | 12.9 [3.4-22.4]                                    | 94.1 (p<0.001)     | 1                      | 0                     | 226                                      | 0.0 [0.0-0.6]                                      | -                  | 1                       | 7                     | 226                                      | 3.1 [0.8-5.4]                                      | -                  |
| Low-risk HCWs                       | 32             | 10102                 | 122743                                   | 6.5 [4.8-8.1]                                      | 99.5 (p<0.001)     | 17                     | 1218                  | 52049                                    | 0.8 [0.6-1.0]                                      | 98.7 (p<0.001)     | 17                      | 1405                  | 52049                                    | 2.3 [1.6-3.1]                                      | 96.1 (p<0.001)     |
| General population                  | 25             | 7707                  | 166312                                   | 7.5 [6.3-8.6]                                      | 99.5 (p<0.001)     | 7                      | 1727                  | 44394                                    | 5.3 [3.5-7.2]                                      | 99.7 (p<0.001)     | 7                       | 681                   | 44394                                    | 3.0 [1.9-4.1]                                      | 98.9 (p<0.001)     |
| Poorly-defined population           | 62             | 354333                | 3328333                                  | 7.5 [6.0-9.0]                                      | 100.0 (p<0.001)    | 22                     | 895                   | 186231                                   | 0.0 [0.0-0.1]                                      | 98.1 (p<0.001)     | 22                      | 8849                  | 186231                                   | 5.4 [4.2-6.6]                                      | 99.2 (p<0.001)     |
| <b>Eastern Mediterranean Region</b> |                |                       |                                          |                                                    |                    |                        |                       |                                          |                                                    |                    |                         |                       |                                          |                                                    |                    |
| Close contacts                      | 0              | -                     | -                                        | -                                                  | -                  | 0                      | -                     | -                                        | -                                                  | -                  | 0                       | -                     | -                                        | -                                                  | -                  |
| High-risk HCWs                      | 2              | 434                   | 1450                                     | 29.9 [27.6-32.3]                                   | 0.0 (p=0.351)      | 1                      | 145                   | 1011                                     | 14.3 [12.2-16.5]                                   | -                  | 1                       | 165                   | 1011                                     | 16.3 [14.0-18.6]                                   | -                  |
| Low-risk HCWs                       | 7              | 343                   | 8683                                     | 8.1 [5.9-10.2]                                     | 98.5 (p<0.001)     | 1                      | 0                     | 203                                      | 0.0 [0.0-0.7]                                      | -                  | 1                       | 23                    | 203                                      | 11.3 [7.0-15.7]                                    | -                  |
| General population                  | 7              | 6237                  | 41247                                    | 12.5 [4.8-20.2]                                    | 99.9 (p<0.001)     | 1                      | 1                     | 142                                      | 0.7 [0.0-2.1]                                      | -                  | 1                       | 5                     | 142                                      | 3.5 [0.5-6.6]                                      | -                  |
| Poorly-defined population           | 8              | 3991                  | 22583                                    | 22.7 [17.0-28.4]                                   | 99.9 (p<0.001)     | 3                      | 176                   | 3912                                     | 2.1 [0.4-3.8]                                      | 98.9 (p<0.001)     | 3                       | 1444                  | 3912                                     | 28.0 [0.0-64.6]                                    | 99.9 (p<0.001)     |
| <b>European Region</b>              |                |                       |                                          |                                                    |                    |                        |                       |                                          |                                                    |                    |                         |                       |                                          |                                                    |                    |

|                               |     |       |        |                  |                 |    |       |        |                 |                |    |       |        |                 |                |
|-------------------------------|-----|-------|--------|------------------|-----------------|----|-------|--------|-----------------|----------------|----|-------|--------|-----------------|----------------|
| Close contacts                | 11  | 2940  | 6791   | 37.1 [25.0-49.1] | 98.8 (p<0.001)  | 4  | 72    | 485    | 17.3 [1.1-33.5] | 96.8 (p<0.001) | 4  | 136   | 485    | 23.9 [0.0-52.5] | 98.8 (p<0.001) |
| High-risk HCWs                | 8   | 362   | 1476   | 16.4 [6.1-26.6]  | 96.7 (p<0.001)  | 4  | 52    | 726    | 6.0 [2.9-9.1]   | 60.3 (p=0.056) | 4  | 60    | 726    | 4.1 [0.0-9.5]   | 92.3 (p<0.001) |
| Low-risk HCWs                 | 54  | 9785  | 138929 | 7.4 [6.3-8.5]    | 99.1 (p<0.001)  | 25 | 2389  | 48804  | 2.8 [2.6-3.0]   | 99.1 (p<0.001) | 25 | 2359  | 48804  | 2.8 [1.8-3.9]   | 98.8 (p<0.001) |
| General population            | 31  | 31389 | 572333 | 7.0 [5.9-8.2]    | 99.7 (p<0.001)  | 15 | 14386 | 512101 | 2.7 [1.9-3.5]   | 99.6 (p<0.001) | 15 | 13081 | 512101 | 2.1 [1.1-3.0]   | 99.8 (p<0.001) |
| Poorly-defined population     | 108 | 15584 | 296586 | 7.2 [6.6-7.8]    | 99.2 (p<0.001)  | 38 | 2970  | 48684  | 3.9 [3.5-4.3]   | 99.3 (p<0.001) | 38 | 1266  | 48684  | 2.6 [2.1-3.1]   | 96.8 (p<0.001) |
| <b>South-East Asia Region</b> |     |       |        |                  |                 |    |       |        |                 |                |    |       |        |                 |                |
| Close contacts                | 1   | 15    | 308    | 4.9 [2.5-7.3]    | -               | 1  | 11    | 308    | 3.6 [1.5-5.6]   | -              | 1  | 4     | 308    | 1.3 [0.0-2.6]   | -              |
| High-risk HCWs                | 0   | -     | -      | -                | -               | 0  | -     | -      | -               | -              | 0  | -     | -      | -               | -              |
| Low-risk HCWs                 | 6   | 209   | 4124   | 2.4 [1.4-3.3]    | 97.9 (p<0.001)  | 4  | 9     | 2367   | 0.1 [0.0-0.4]   | 65.0 (p=0.036) | 4  | 66    | 2367   | 0.7 [0.0-1.5]   | 96.1 (p<0.001) |
| General population            | 7   | 20236 | 117719 | 22.0 [11.2-32.8] | 100.0 (p<0.001) | 2  | 52    | 4604   | 0.6 [0.0-1.9]   | 96.6 (p<0.001) | 2  | 809   | 4604   | 11.6 [0.0-26.2] | 99.4 (p<0.001) |
| Poorly-defined population     | 7   | 2959  | 23277  | 10.8 [5.0-16.5]  | 99.6 (p<0.001)  | 4  | 71    | 6325   | 1.0 [0.1-1.9]   | 93.5 (p<0.001) | 4  | 190   | 6325   | 3.3 [1.5-5.0]   | 93.6 (p<0.001) |
| <b>Western Pacific Region</b> |     |       |        |                  |                 |    |       |        |                 |                |    |       |        |                 |                |
| Close contacts                | 2   | 61    | 1270   | 8.5 [0.0-18.6]   | -               | 1  | 9     | 120    | 7.5 [2.8-12.2]  | -              | 1  | 8     | 120    | 6.7 [2.2-11.1]  | -              |
| High-risk HCWs                | 2   | 171   | 3937   | 10.1 [0.0-22.9]  | 92.1 (p<0.001)  | 1  | 4     | 105    | 3.8 [0.1-7.5]   | -              | 1  | 14    | 105    | 13.3 [6.8-19.8] | -              |
| Low-risk HCWs                 | 15  | 238   | 18469  | 0.8 [0.4-1.2]    | 92.9 (p<0.001)  | 10 | 12    | 11898  | 0.0 [0.0-0.1]   | 17.3 (p=0.284) | 10 | 133   | 11898  | 0.8 [0.3-1.2]   | 91.0 (p<0.001) |
| General population            | 11  | 5032  | 179814 | 2.4 [1.6-3.2]    | 99.7 (p<0.001)  | 5  | 19    | 45342  | 0.0 [0.0-0.0]   | 79.3 (p<0.001) | 5  | 1465  | 45342  | 1.9 [0.0-3.8]   | 99.7 (p<0.001) |
| Poorly-defined population     | 20  | 1265  | 101887 | 1.4 [1.1-1.7]    | 98.3 (p<0.001)  | 5  | 0     | 58789  | 0.0 [0.0-0.0]   | 0.0 (p=1.000)  | 5  | 692   | 58789  | 1.5 [0.9-2.1]   | 97.6 (p<0.001) |

## Appendix figures

**Figure S1. Quality scores assigned to SARS-CoV-2 serological studies by study populations, December 2019- December 2020.**

**(A)** Median quality score and range from assessment of serological studies of close contacts, high-risk healthcare workers, low-risk healthcare workers, general population, and Poorly-defined population. **(B)** Quality of studies by grade category (i.e. A, B, C and D). Category A included studies with scores ranging from 10 to 12, category B from 7 to 9, category C from 4 to 6, and category D from 0 to 3.

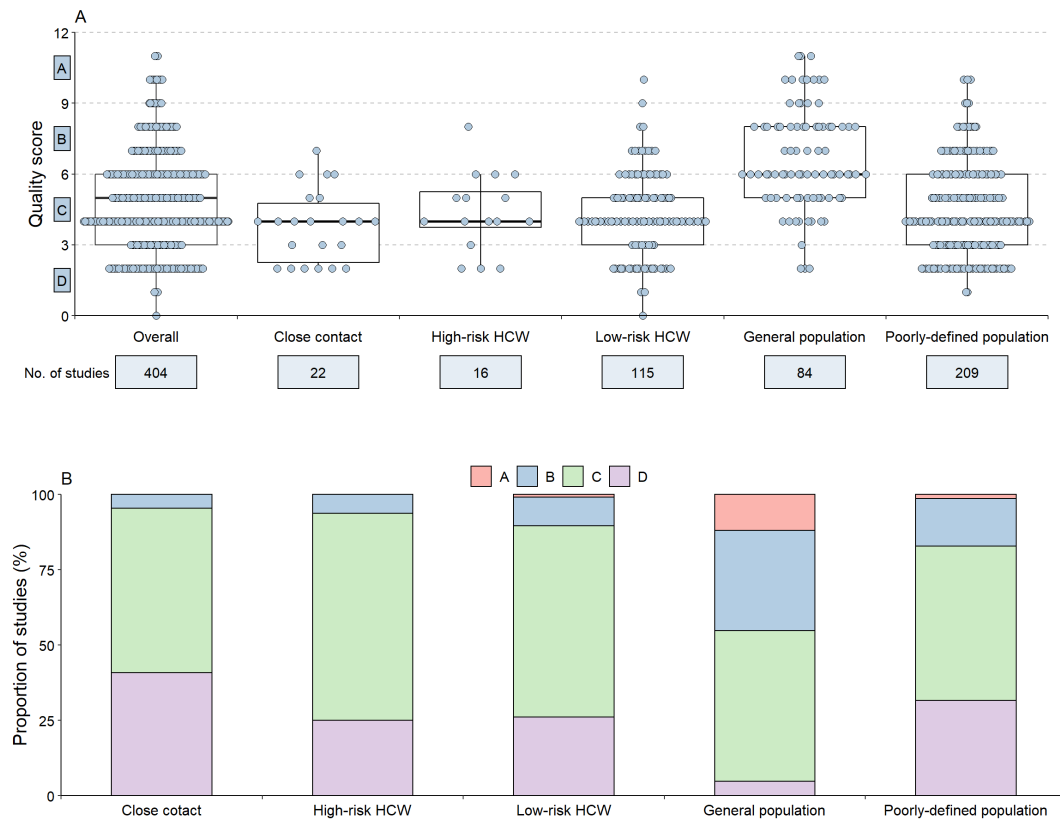

**Figure S2. The starting sampling date for each serological study included in this meta-analysis in African Region**

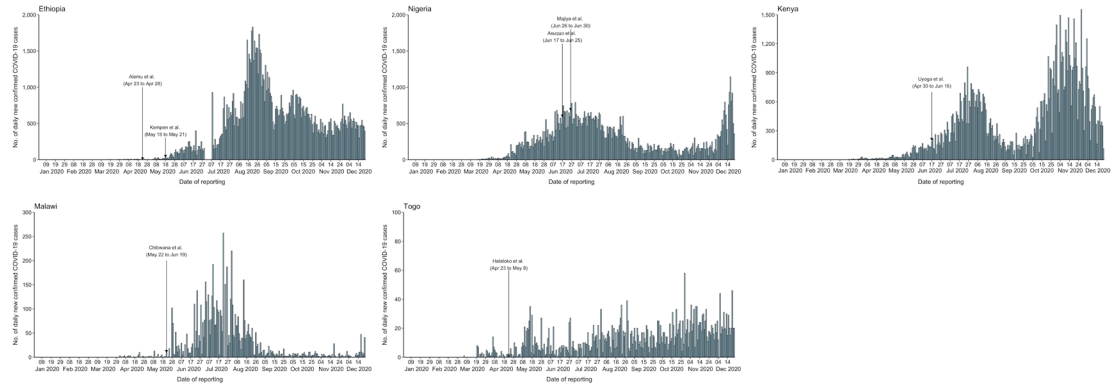

**Figure S3. The starting sampling date for each serological study included in this meta-analysis in region of the Americas**

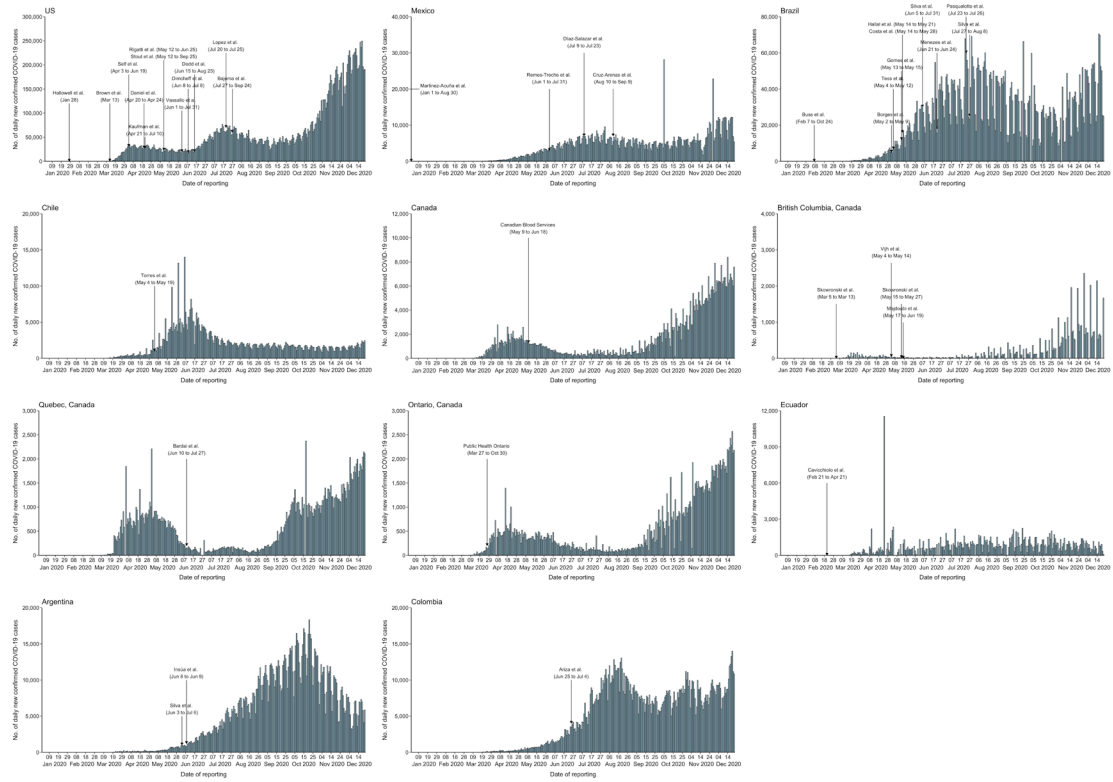

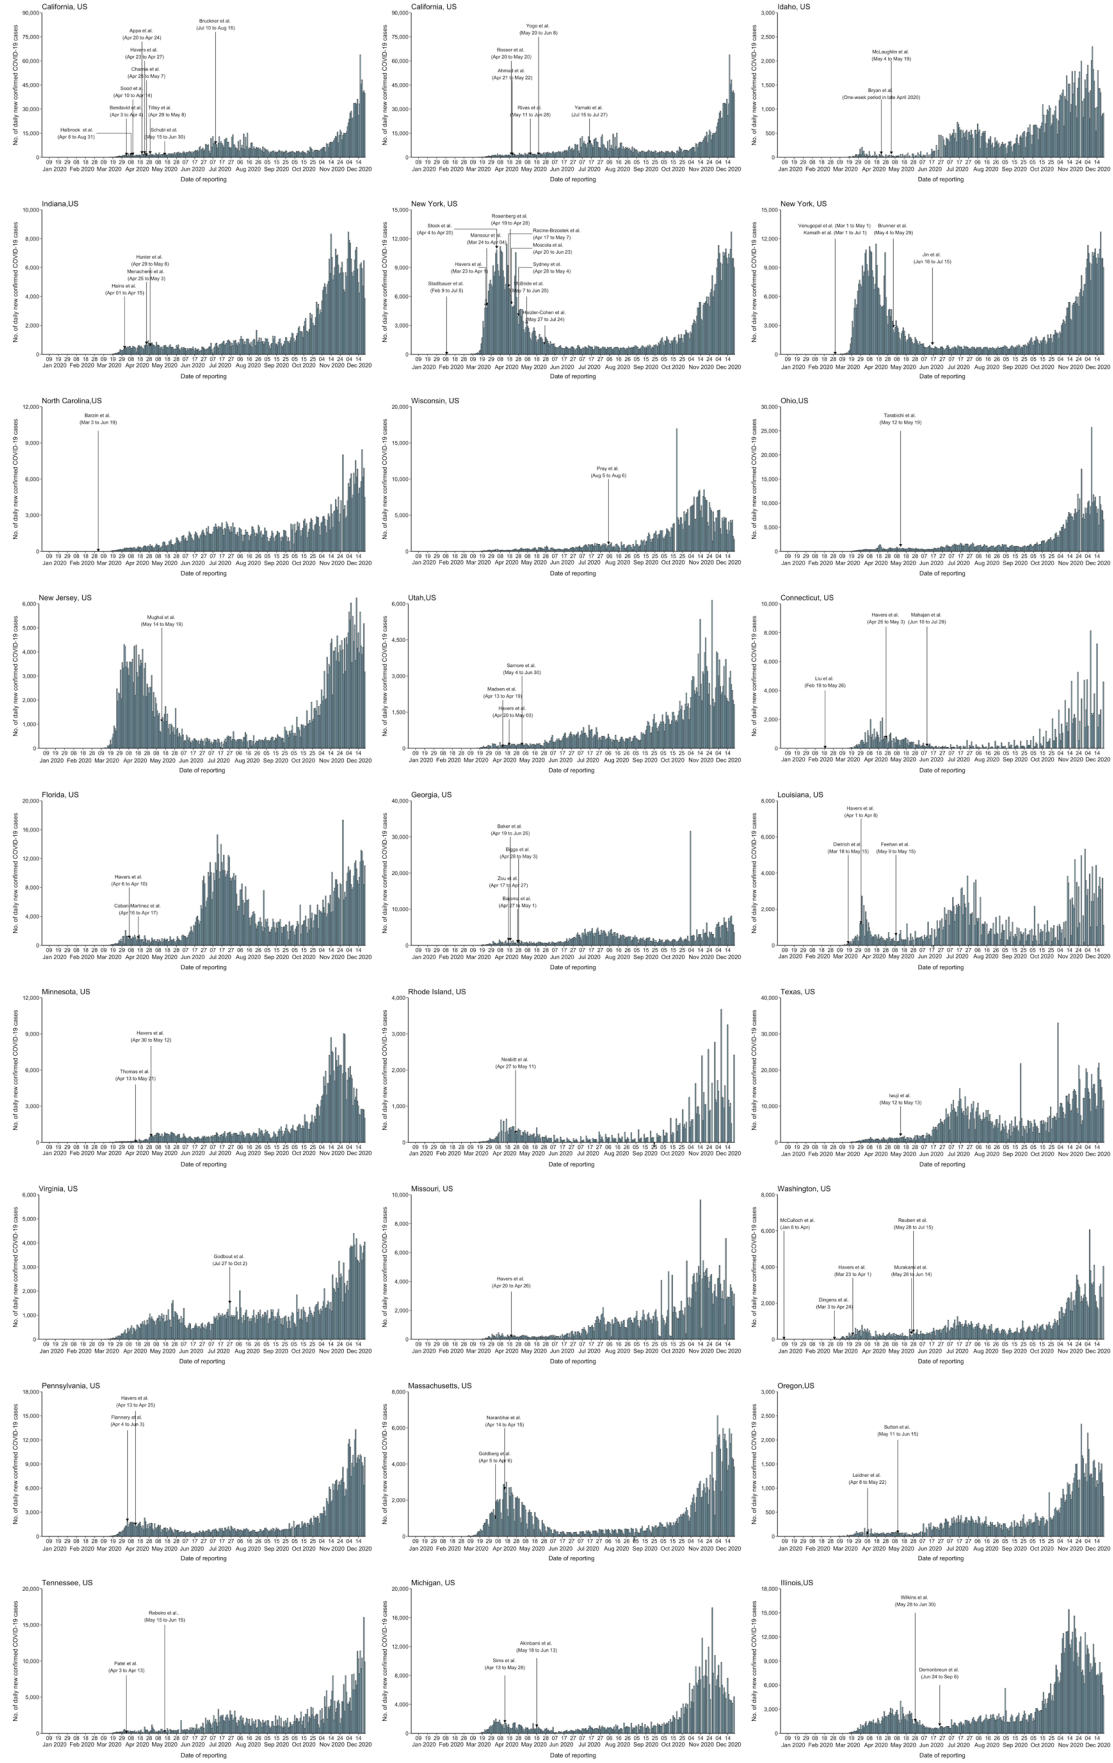

**Figure S4. The starting sampling date for each serological study included in this meta-analysis in Eastern Mediterranean Region**

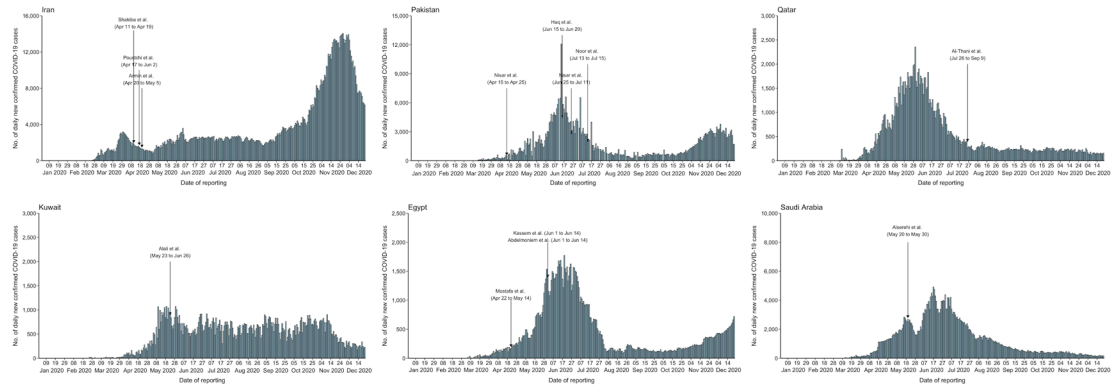



**Figure S5. The starting sampling date for each serological study included in this meta-analysis in European Region**

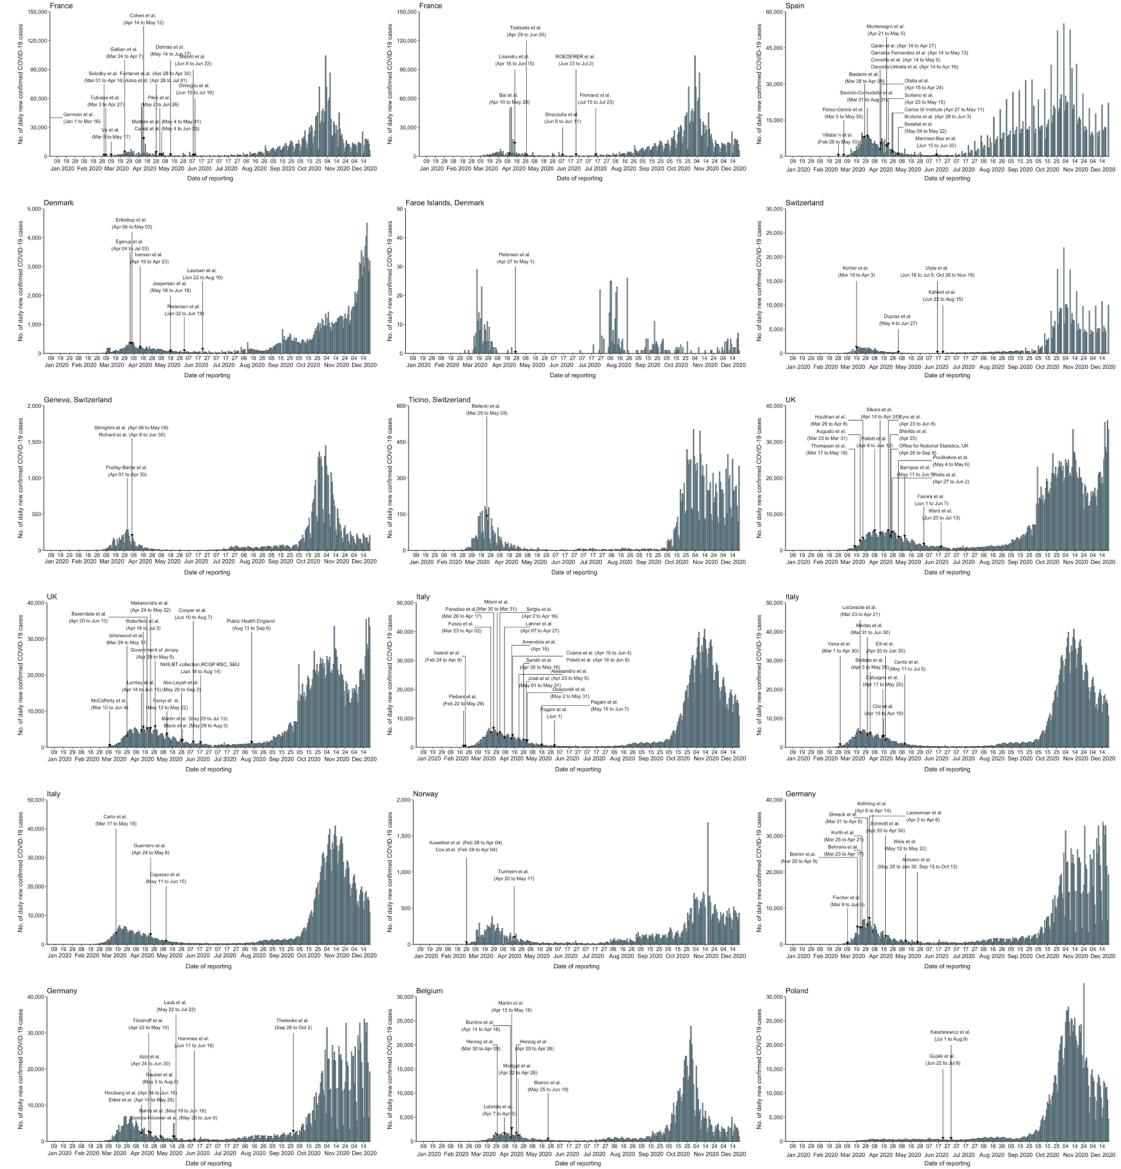

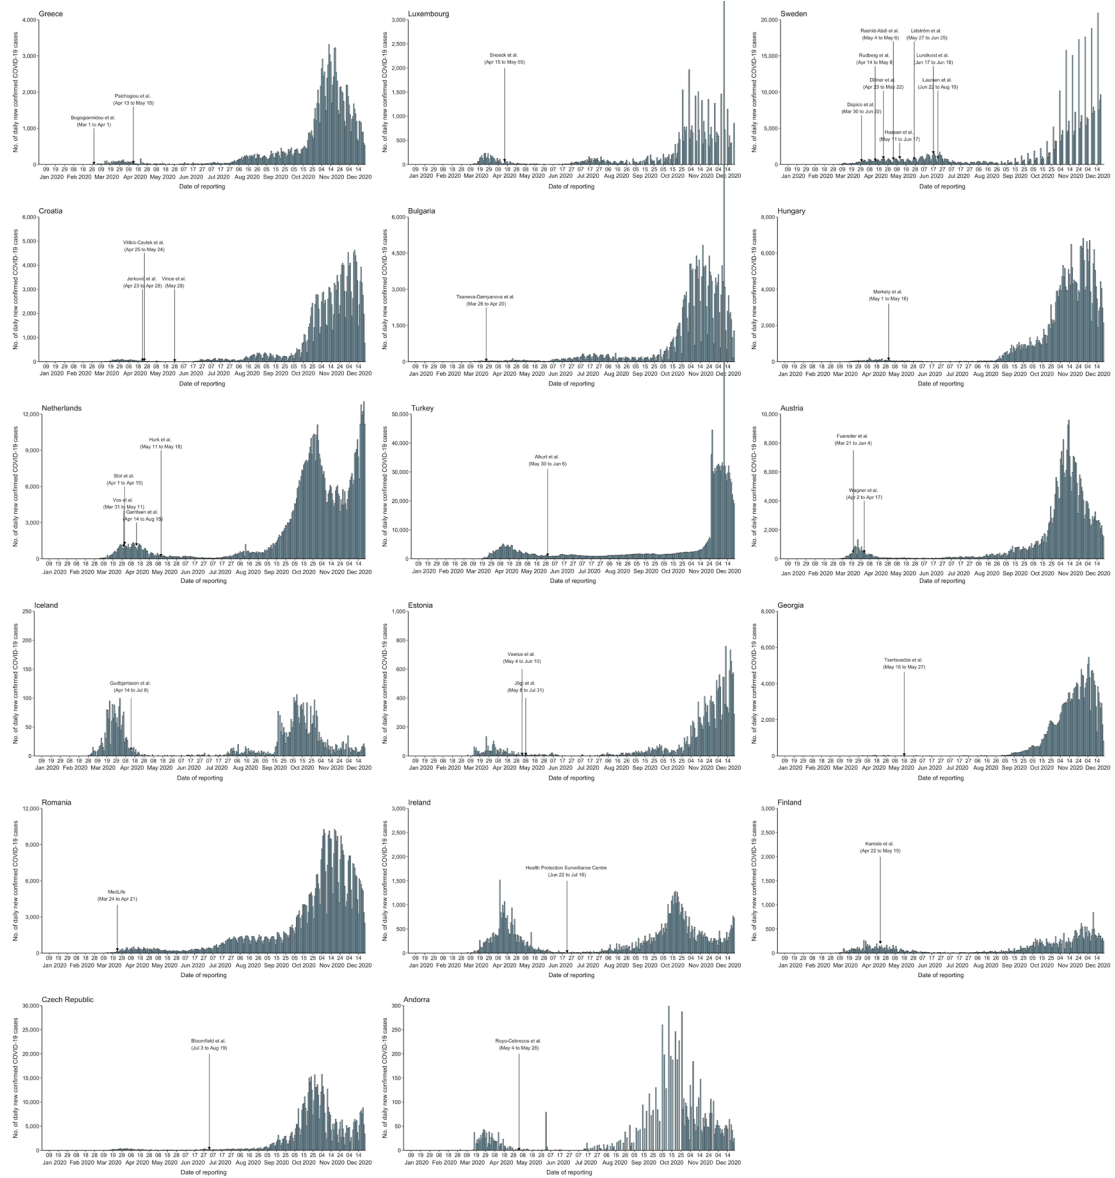



**Figure S7. The starting sampling date for each serological study included in this meta-analysis in Western Pacific Region**

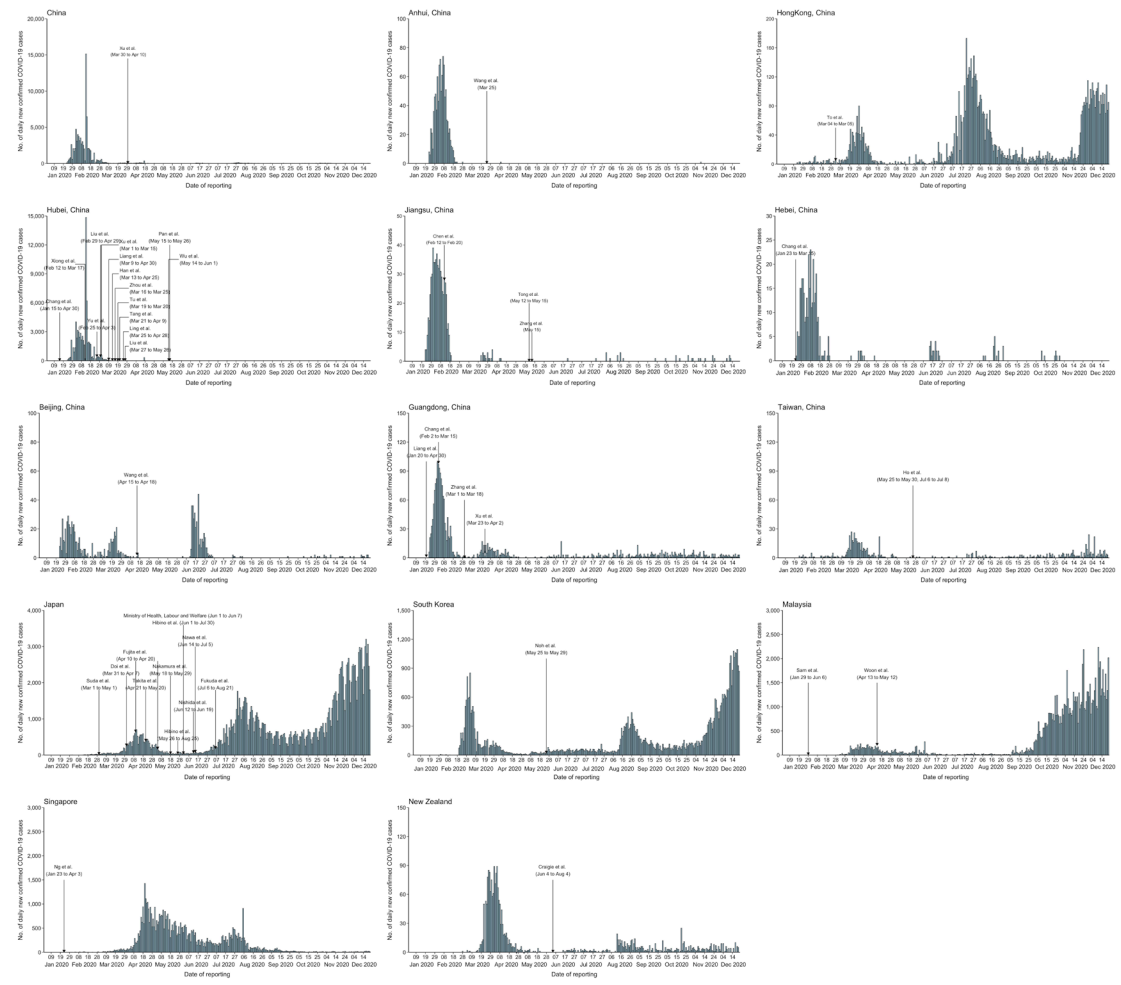

**Figure S8. The proportion of reported cases that occurred in each area by 2 weeks before the middle time point of each population-based serosurvey**

We calculate the proportion of reported COVID-19 that occurred 2 weeks before the middle time point of each population-based serosurvey cases among all cases up to Dec 22 that occurred in each area with available epidemiological data.

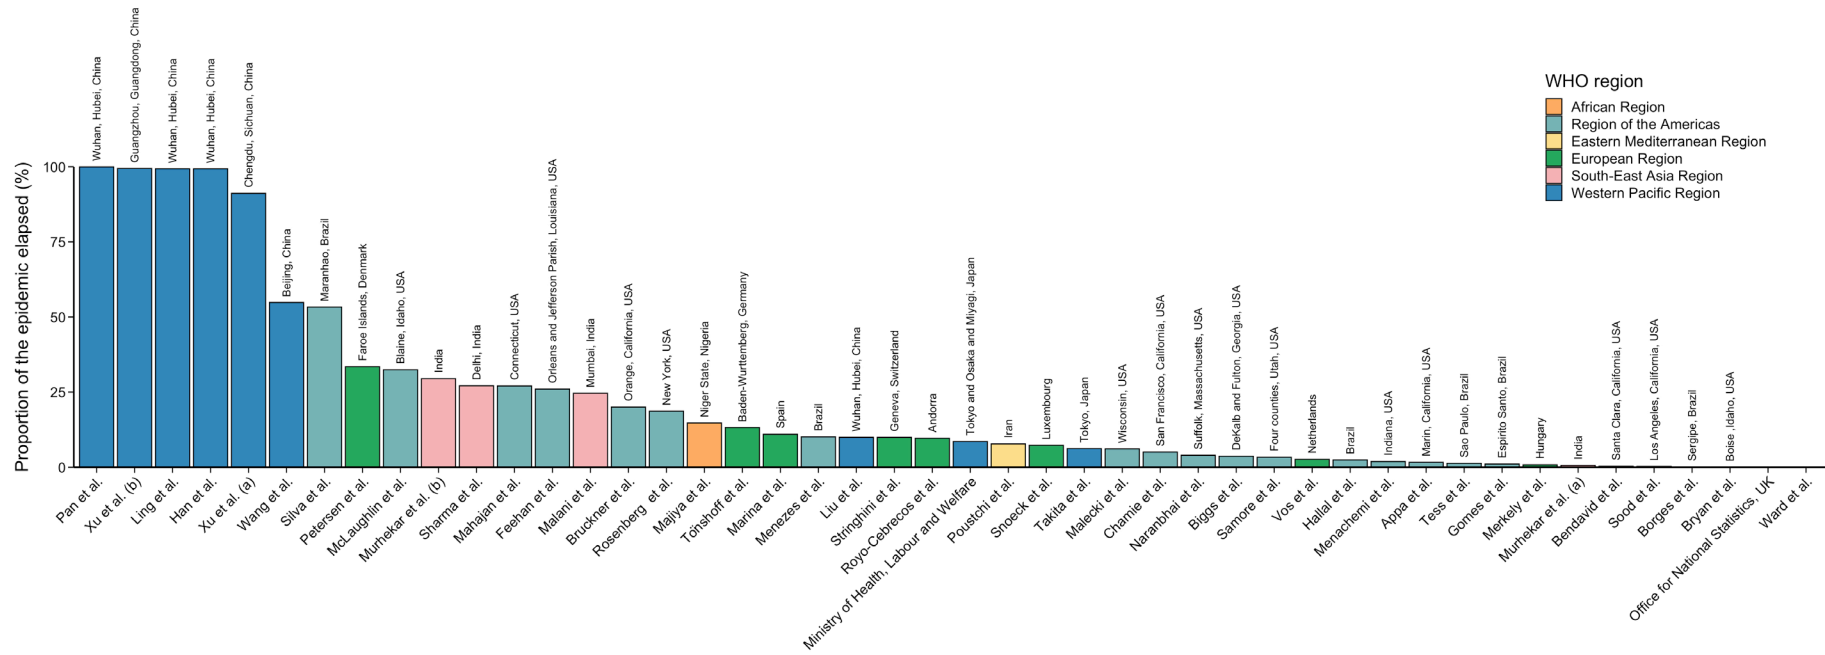

**Figure S9. Geographical distribution of SARS-CoV-2 serosurveys in humans by study populations, December 2019-December 2020.**

(A) Serological studies in the whole world. (B) Serological studies in Europe. The color of the map indicates the cumulative incidence of reported cases with darker colors representing higher values.

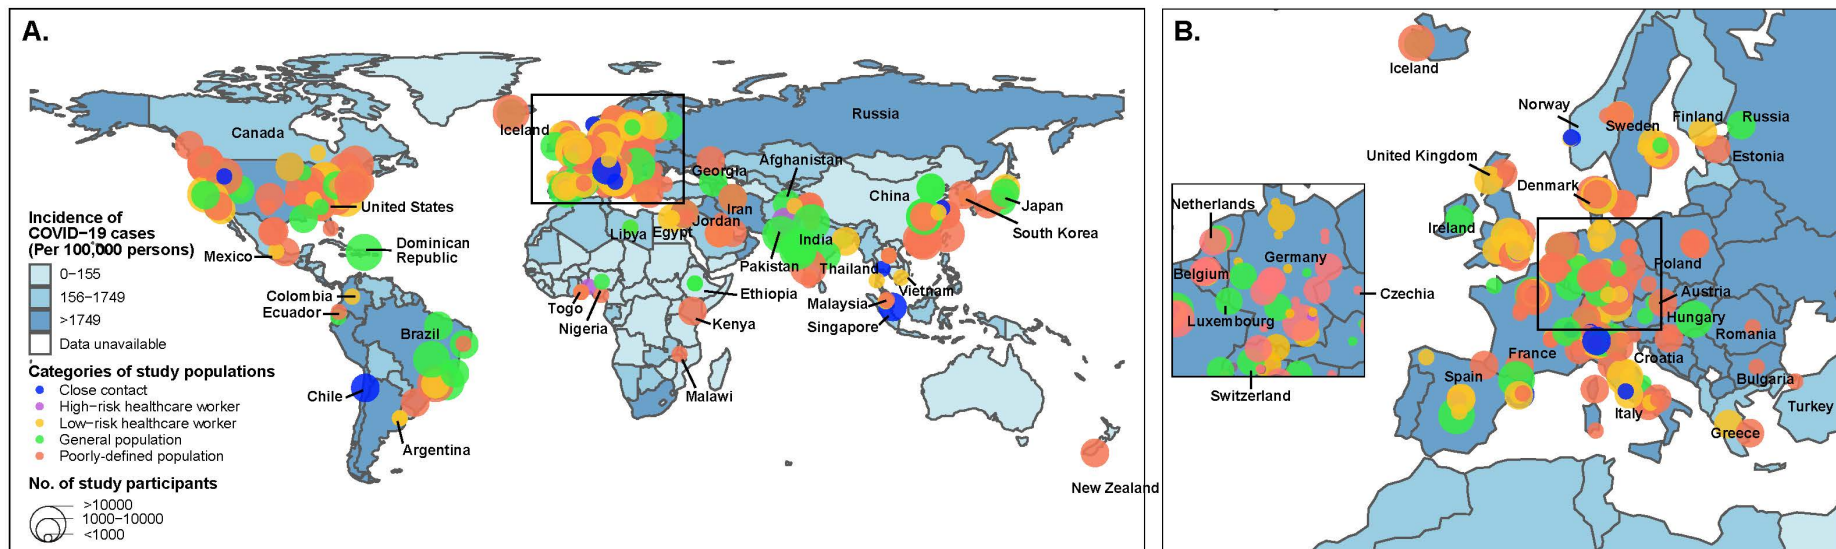

**Figure S10. Estimated seroprevalence of antibodies to SARS-CoV-2 among grade A and grade B studies involving general populations by age group**

**(A)** Seroprevalence of infections with SARS-CoV-2 by age groups. Seroprevalence of infections with SARS-CoV-2 by age groups in the Region of the Americas **(B)** and the European region **(C)**.

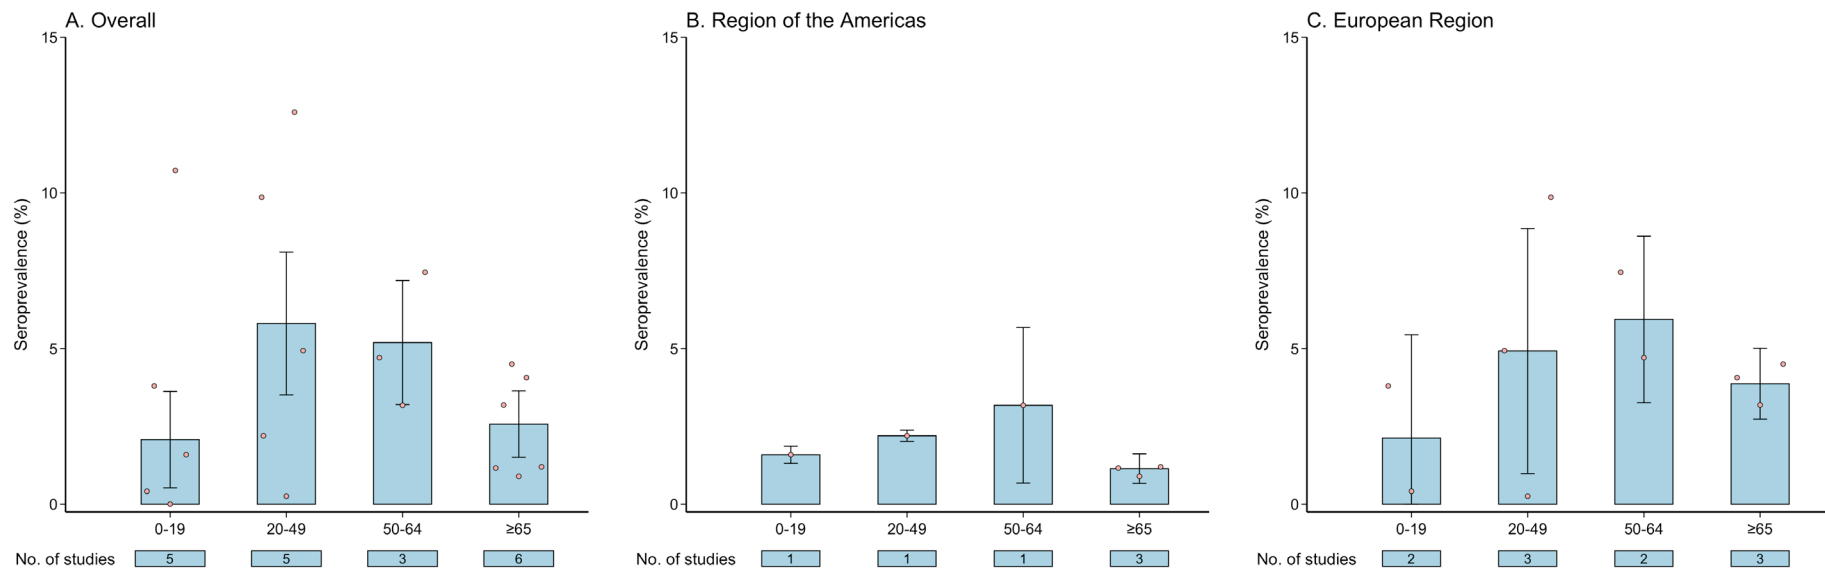



**Figure S11. Estimated seroprevalence of antibodies to SARS-CoV-2 among grade A and grade B studies involving general populations by sex**

**(A)** Seroprevalence of infections with SARS-CoV-2 by sexes. Seroprevalence of infections with SARS-CoV-2 by sexes in the African region **(B)**, the Region of the Americas **(C)**, the Eastern Mediterranean Region **(D)**, the European region **(E)**, the South-East Asia Region **(F)**, and the Western Pacific region **(G)**.

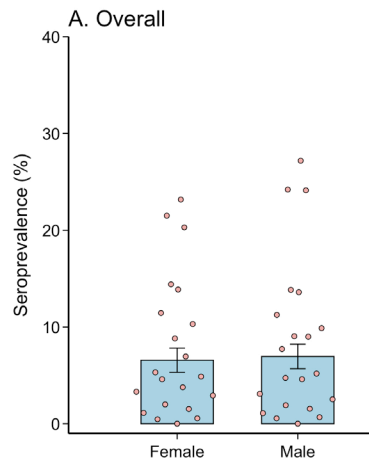

No. of studies 21 21

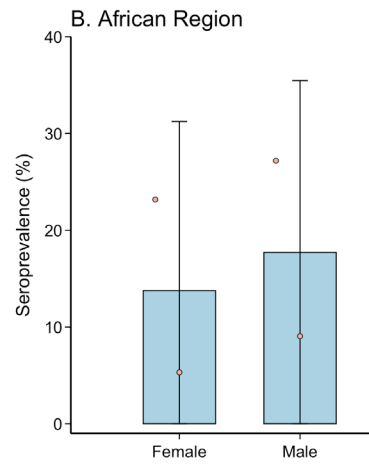

No. of studies 2 2

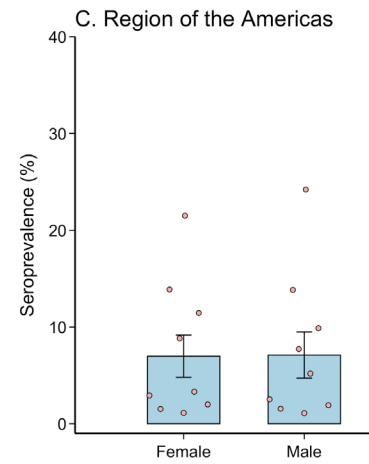

No. of studies 9 9

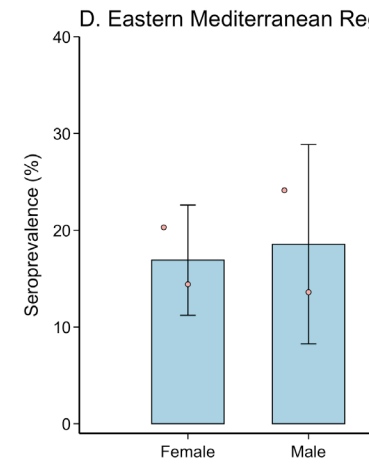

No. of studies 2 2

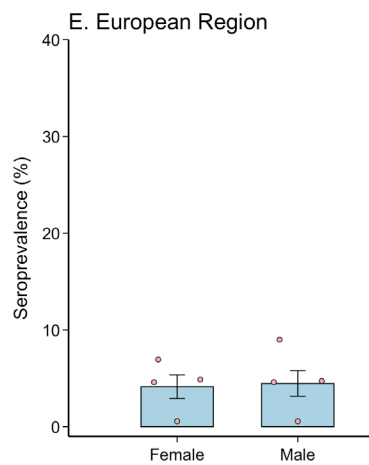

No. of studies 4 4

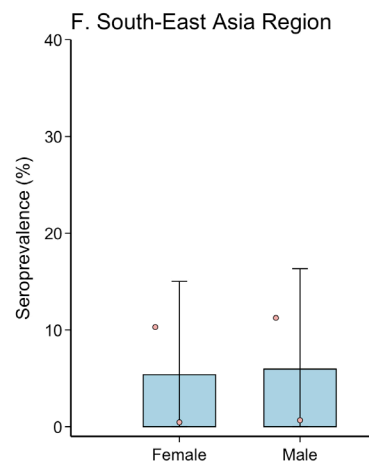

No. of studies 2 2

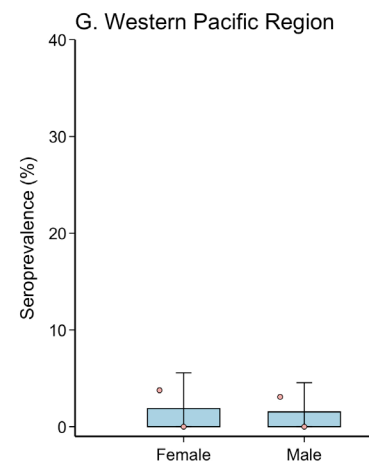

No. of studies 2 2

**Figure S12. Estimated seroprevalence of antibodies to SARS-CoV-2 among grade A and grade B studies involving general populations by race**

**(A)** Seroprevalence of infections with SARS-CoV-2 by races. Seroprevalence of infections with SARS-CoV-2 by races in the Region of the Americas **(B)** and the European region **(C)**.

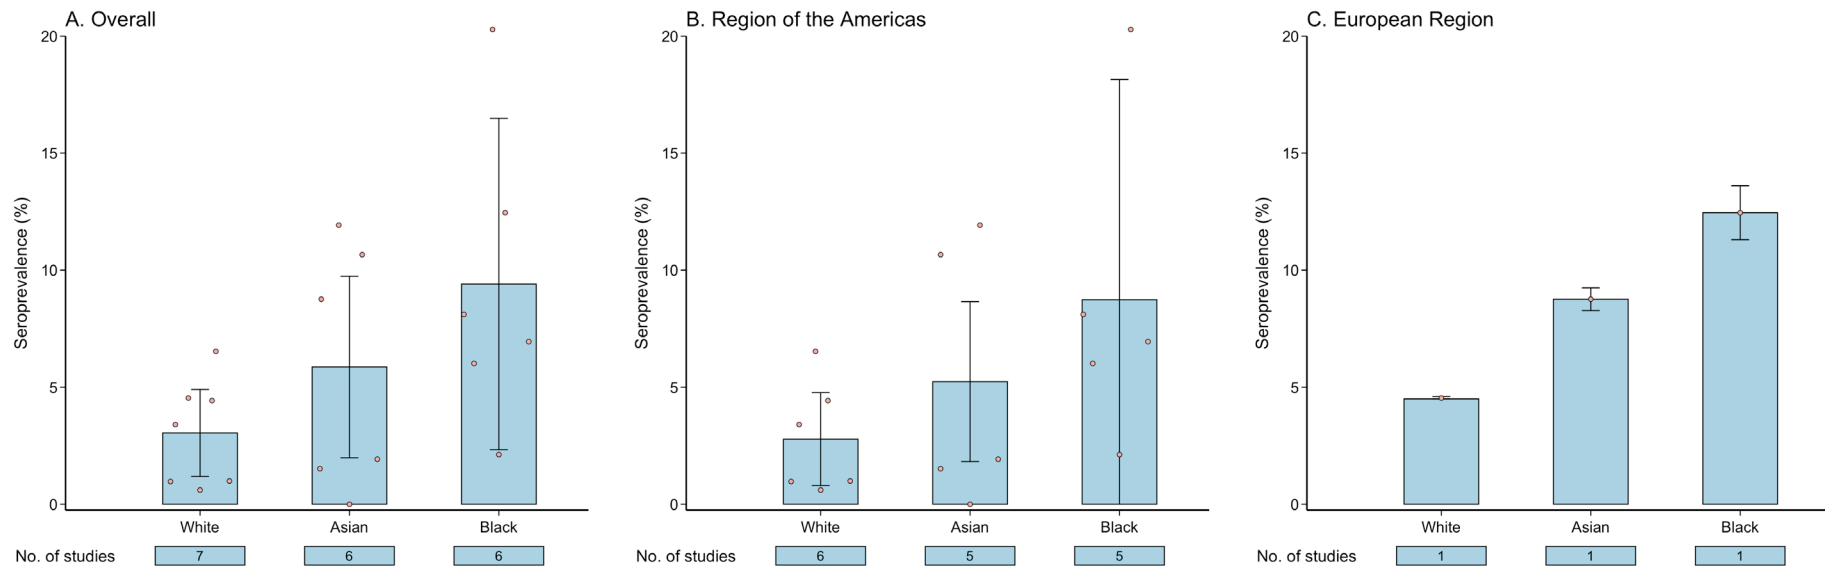

**Figure S13. Regression analysis between seroprevalence and local cumulative incidence among grade A and grade B studies involving general populations**

The shaded region represents the 95% confidence level for the predicted value.

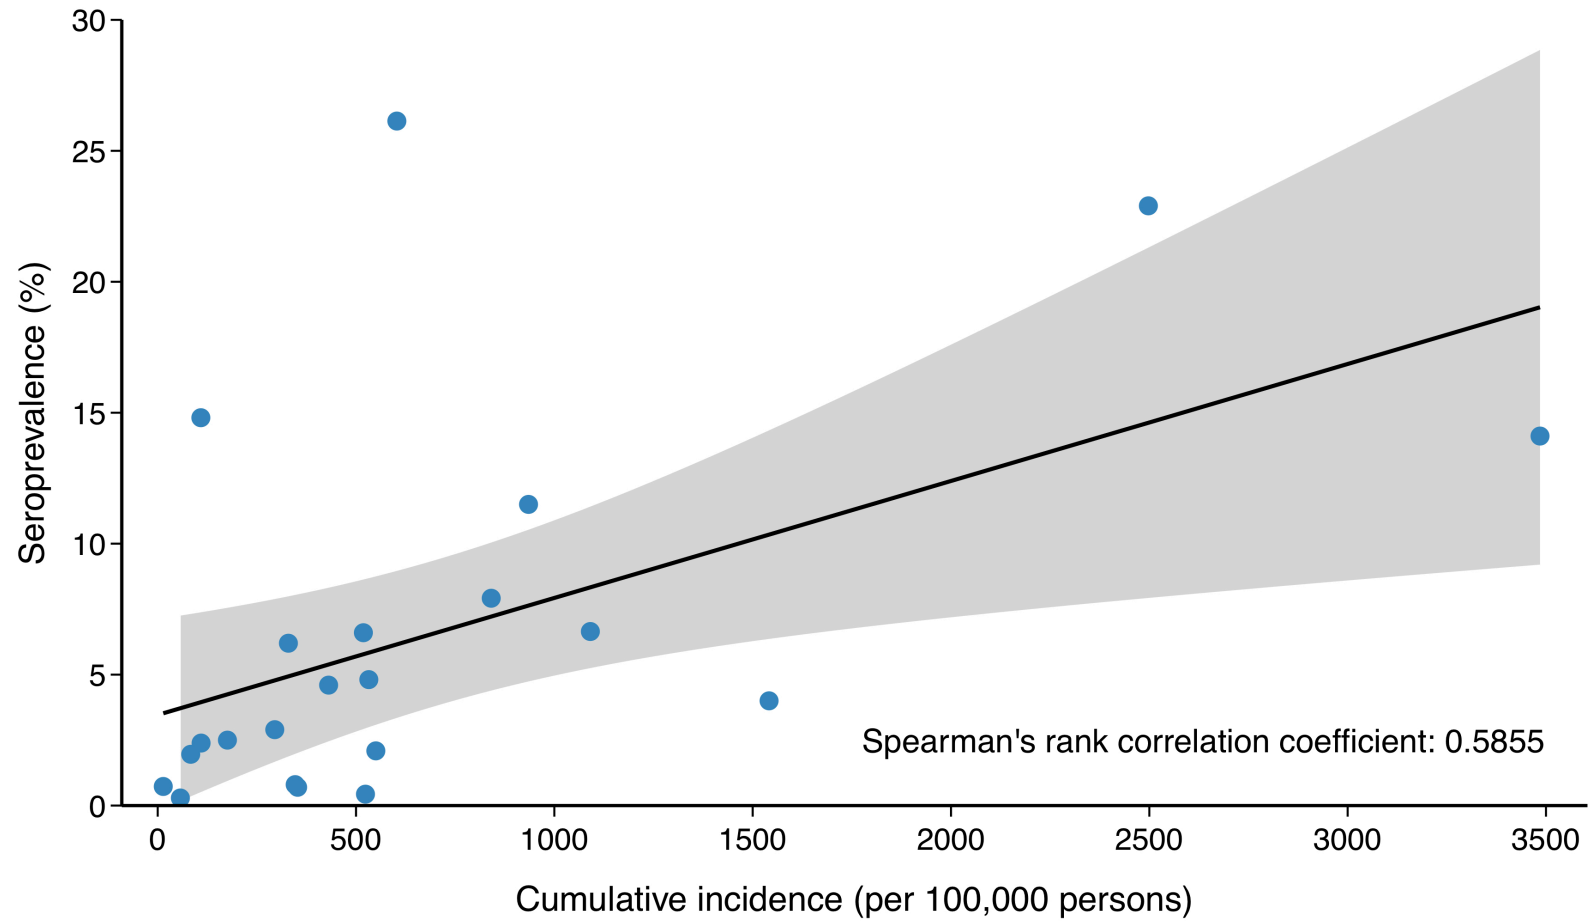

**Figure S14. Estimated seroprevalence by WHO regions and study populations among all 404 studies**

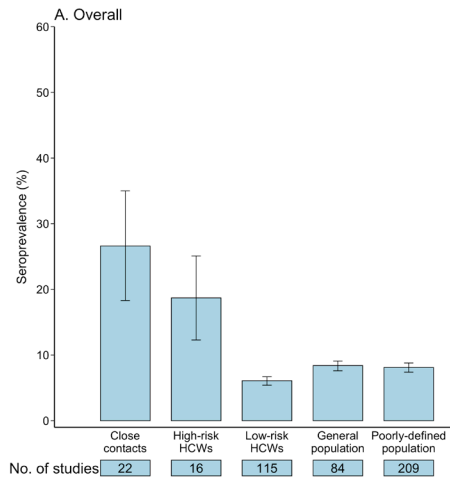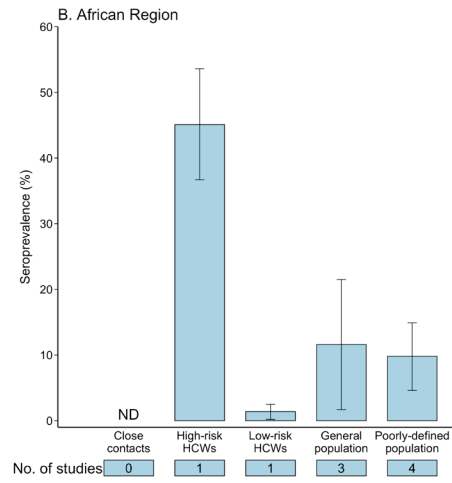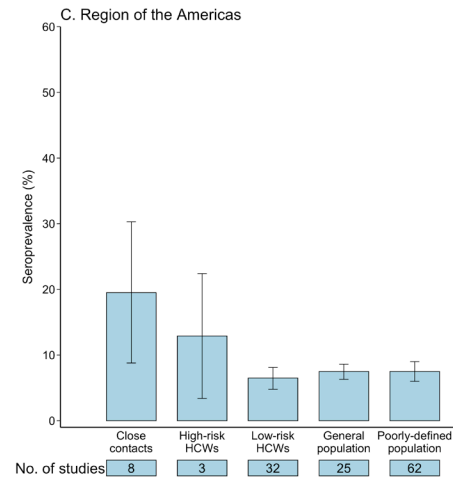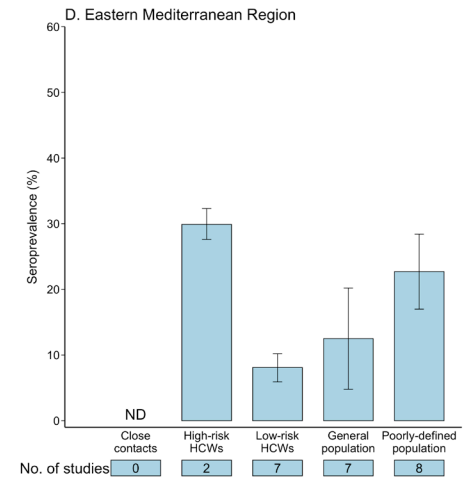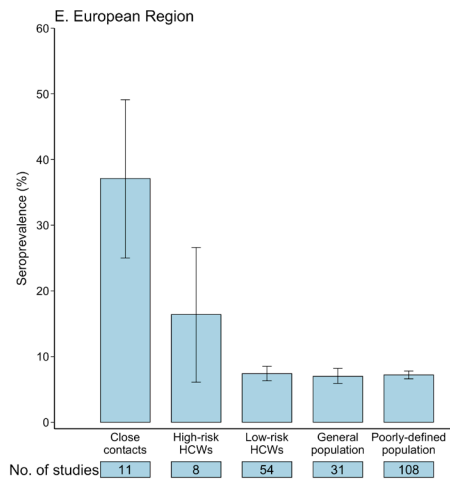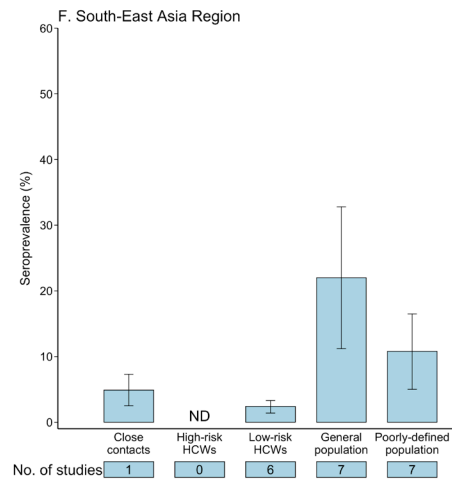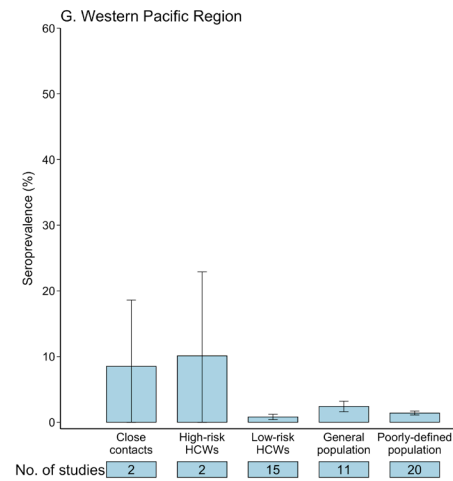

## References

1. Horby PW, Laurie KL, Cowling BJ, et al. CONSISE statement on the reporting of Seroepidemiologic Studies for influenza (ROSES-I statement): an extension of the STROBE statement. *Influenza Other Respir Viruses* 2017; **11**(1): 2-14.
2. Sikkema RS, Freidl GS, de Bruin E, Koopmans M. Weighing serological evidence of human exposure to animal influenza viruses - a literature review. *Euro Surveill* 2016; **21**(44).
3. WHO. Population-based age-stratified seroepidemiological investigation protocol for COVID-19 virus infection. 2020.
4. Gelman A, Carpenter B. Bayesian analysis of tests with unknown specificity and sensitivity. 2020; **69**(5): 1269-83.
5. Gelman A, Carpenter B. Diagnostic Tests. Bayesian statistical analysis of diagnostic tests using Stan. 2020. <https://bob-carpenter.github.io/diagnostic-testing/> (accessed Dec 22 2020).
6. Betancourt M. A Conceptual Introduction to Hamiltonian Monte Carlo. 2017.
7. Gabry J, Simpson D, Vehtari A, Betancourt M, Gelman A. Visualization in Bayesian workflow. 2019; **182**(2): 389-402.
8. Amanat F, Stadlbauer D, Strohmeier S, et al. A serological assay to detect SARS-CoV-2 seroconversion in humans. *Nature medicine* 2020; **26**(7): 1033-6.
9. Berhanu Nega Alemu (MD)<sup>1</sup> † AAM, Ph.D)<sup>2</sup> †, Gemechis Mamo (MD)<sup>3</sup>, Negussie Deyessa, (MD P, Tamrat Abebe (PhD)<sup>4</sup>, Abdulnasir Abagero (MPH)<sup>2</sup>, Wondimu Ayele (PhD)<sup>2</sup>, Workeabeba, Abebe (MD)<sup>5</sup> THM, Rahel Argaw (MD)<sup>5</sup>, Wondwossen Amogne (MD, PhD)<sup>6</sup>, Ayele, Belachew (MD)<sup>2</sup> ZDP, Brhanu Teka (PhD)<sup>4</sup>, Eva Kantelhardt (MD)<sup>7</sup>, Mesfin Wossen, (MPH)<sup>8</sup> SAM, Getachew



- Tollera (MD)<sup>8</sup>, Lia Tadesse (MD) <sup>9</sup>. Sero-prevalence of anti-SARS-CoV-2 Antibodies in Addis Ababa, Ethiopia. *medRxiv* 2020.
10. Majiya H, Aliyu-Paiko M, Balogu VT, et al. Seroprevalence of COVID-19 in Niger State. 2020: 2020.08.04.20168112.
11. Uyoga S, Adetifa IMO, Karanja HK, et al. Seroprevalence of anti-SARS-CoV-2 IgG antibodies in Kenyan blood donors. *Science* 2020.
12. Self WH, Tenforde MW, Stubblefield WB, et al. Seroprevalence of SARS-CoV-2 Among Frontline Health Care Personnel in a Multistate Hospital Network - 13 Academic Medical Centers, April-June 2020. *MMWR Morb Mortal Wkly Rep* 2020; **69**(35): 1221-6.
13. Ariza BE, Torres YX, Salgado D, et al. Seroprevalence and seroconversion rates to SARS-CoV-2 in interns, residents, and medical doctors in a University Hospital in Bogota, Colombia. 2020: 2020.09.15.20195313.
14. Brant-Zawadzki M, Fridman D, Robinson PA, et al. Prevalence and Longevity of SARS-CoV-2 Antibodies in Healthcare Workers: A Single Center Study. 2020: 2020.10.09.20210229.
15. Sims MD, Maine GN, Childers KL, et al. COVID-19 seropositivity and asymptomatic rates in healthcare workers are associated with job function and masking. *Clin Infect Dis* 2020.
16. Moscola J, Sembajwe G, Jarrett M, et al. Prevalence of SARS-CoV-2 Antibodies in Health Care Personnel in the New York City Area. *Jama* 2020.
17. Hallal PC, Hartwig FP, Horta BL, et al. SARS-CoV-2 antibody prevalence in Brazil: results from two successive nationwide serological household surveys. *The Lancet Global health* 2020; **8**(11): e1390-e8.

18. Samore MH, Looney A, Orleans B, et al. SARS-CoV-2 seroprevalence and detection fraction in Utah urban populations from a probability-based sample. 2020: 2020.10.26.20219907.
19. Sood N, Simon P, Ebner P, et al. Seroprevalence of SARS-CoV-2-Specific Antibodies Among Adults in Los Angeles County, California, on April 10-11, 2020. *Jama* 2020.
20. Naranbhai V, Chang CC, Beltran WFG, et al. High seroprevalence of anti-SARS-CoV-2 antibodies in Chelsea, Massachusetts. *J Infect Dis* 2020.
21. Borges LP, Martins AF, de Melo MS, et al. Seroprevalence of SARS-CoV-2 IgM and IgG antibodies in an asymptomatic population in Sergipe, Brazil. *Revista panamericana de salud publica = Pan American journal of public health* 2020; **44**: e108.
22. Bruckner TA, Parker DM, Bartell SM, et al. Estimated Seroprevalence of SARS-CoV-2 Antibodies Among Adults in Orange County, California. 2020: 2020.10.07.20208660.
23. Mahajan S, Srinivasan R, Redlich CA, et al. Seroprevalence of SARS-CoV-2-Specific IgG Antibodies Among Adults Living in Connecticut Between March 1 and June 1, 2020: Post-Infection Prevalence (PIP) Study. 2020: 2020.08.04.20168203.
24. Tess BH, Granato CFH, Alves MCGP, et al. SARS-CoV-2 seroprevalence in the municipality of Sao Paulo, Brazil, ten weeks after the first reported case. *medRxiv* 2020: 2020.06.29.20142331.
25. McLaughlin C, Doll MK, Morrison KT, et al. High Community SARS-CoV-2 Antibody Seroprevalence in a Ski Resort Community, Blaine County, Idaho, US. Preliminary Results. 2020: 2020.07.19.20157198.

26. Rosenberg ES, Tesoriero JM, Rosenthal EM, et al. Cumulative incidence and diagnosis of SARS-CoV-2 infection in New York. *Annals of Epidemiology* 2020.
27. Bendavid E, Mulaney B, Sood N, et al. COVID-19 Antibody Seroprevalence in Santa Clara County, California. 2020: 2020.04.14.20062463.
28. Biggs HM, Harris JB, Breakwell L, et al. Estimated Community Seroprevalence of SARS-CoV-2 Antibodies - Two Georgia Counties, April 28-May 3, 2020. *MMWR Morb Mortal Wkly Rep* 2020; **69**(29): 965-70.
29. Appa A, Takahashi S, Rodriguez-Barraquer I, et al. Universal PCR and antibody testing demonstrate little to no transmission of SARS-CoV-2 in a rural community. 2020: 2020.08.15.20175786.
30. Ontario PH. COVID-19 Seroprevalence in Ontario. 2020.  
<https://www.publichealthontario.ca/-/media/documents/ncov/epi/2020/07/covid-19-epi-seroprevalence-in-ontario.pdf?la=en> (accessed Dec 12 2020).
31. Tilley K, Ayvazyan V, Martinez L, et al. A Cross-Sectional Study Examining the Seroprevalence of Severe Acute Respiratory Syndrome Coronavirus 2 Antibodies in a University Student Population. *The Journal of adolescent health : official publication of the Society for Adolescent Medicine* 2020.
32. Anand S, Montez-Rath M, Han J, et al. Prevalence of SARS-CoV-2 antibodies in a large nationwide sample of patients on dialysis in the USA: a cross-sectional study. *Lancet* 2020; **396**(10259): 1335-44.
33. Stadlbauer D, Tan J, Jiang K, et al. Repeated cross-sectional sero-monitoring of SARS-CoV-2 in New York City. *Nature* 2020.

34. Majdoubi A, Michalski C, O'Connell SE, et al. Antibody reactivity to SARS-CoV-2 is common in unexposed adults and infants under 6 months. 2020: 2020.10.05.20206664.
35. Buss LF, Prete CA, Jr., Abraham CMM, et al. Three-quarters attack rate of SARS-CoV-2 in the Brazilian Amazon during a largely unmitigated epidemic. *Science* 2020.
36. Skowronski DM, Sekirov I, Sabaiduc S, et al. Low SARS-CoV-2 seroprevalence based on anonymized residual sero-survey before and after first wave measures in British Columbia, Canada, March-May 2020. 2020: 2020.07.13.20153148.
37. Havers FP, Reed C, Lim T, et al. Seroprevalence of Antibodies to SARS-CoV-2 in 10 Sites in the United States, March 23-May 12, 2020. *JAMA internal medicine* 2020.
38. Poustchi H, Darvishian M, Mohammadi Z, et al. SARS-CoV-2 antibody seroprevalence in the general population and high-risk occupational groups across 18 cities in Iran: a population-based cross-sectional study. *Lancet Infect Dis* 2020.
39. Nisar MI, Ansari N, Amin M, et al. Serial population based serosurvey of antibodies to SARS-CoV-2 in a low and high transmission area of Karachi, Pakistan. 2020: 2020.07.28.20163451.
40. Shakiba M, Nazemipour M, Salari A, et al. Seroprevalence of SARS-CoV-2 in Guilan Province, Iran, April 2020. *Emerg Infect Dis* 2020; **27**(2).
41. Brotons P, Launes C, Buetas E, et al. Susceptibility to Sars-COV-2 Infection Among Children And Adults: A Seroprevalence Study of Family Households in the Barcelona Metropolitan Region, Spain. *Clin Infect Dis* 2020.

42. Iversen K, Bundgaard H, Hasselbalch RB, et al. Risk of COVID-19 in health-care workers in Denmark: an observational cohort study. *Lancet Infect Dis* 2020.
43. Laursen J, Petersen J, Didriksen M, Iversen KK, Ullum H. Prevalence of SARS-CoV-2 IgG/IgM antibodies among Danish and Swedish Falck emergency and non-emergency healthcare workers. 2020: 2020.09.26.20202259.
44. Trieu MC, Bansal A, Madsen A, et al. SARS-CoV-2-specific neutralizing antibody responses in Norwegian healthcare workers after the first wave of COVID-19 pandemic: a prospective cohort study. *J Infect Dis* 2020.
45. Garcia-Basteiro AL, Moncunill G, Tortajada M, et al. Seroprevalence of antibodies against SARS-CoV-2 among health care workers in a large Spanish reference hospital. *Nature communications* 2020; **11**(1): 3500.
46. Ward H, Cooke G, Atchison C, et al. Declining prevalence of antibody positivity to SARS-CoV-2: a community study of 365,000 adults. 2020: 2020.10.26.20219725.
47. Stringhini S, Wisniak A, Piumatti G, et al. Seroprevalence of anti-SARS-CoV-2 IgG antibodies in Geneva, Switzerland (SEROCoV-POP): a population-based study. *The Lancet* 2020.
48. Richard A, Wisniak A, Perez-Saez J, et al. Seroprevalence of anti-SARS-CoV-2 IgG antibodies, risk factors for infection and associated symptoms in Geneva, Switzerland: a population-based study. 2020: 2020.12.16.20248180.
49. Office for National Statistics U. Incidence of SARS-CoV-2 infection and prevalence of immunity to SARS-CoV-2 in the UK general population as assessed through repeated cross-sectional household surveys with additional serial sampling and longitudinal follow-up - an Office of National Statistics Survey. 2020.

<https://www.ons.gov.uk/peoplepopulationandcommunity/healthandsocialcare/conditionsanddiseases/bulletins/coronaviruscovid19infectionsurveyspilot/england25june2020> (accessed Dec 22 2020).

50. Gudbjartsson DF, Norddahl GL, Melsted P, et al. Humoral Immune Response to SARS-CoV-2 in Iceland. *N Engl J Med* 2020.

51. Carrat F, de Lamballerie X, Rahib D, et al. Seroprevalence of SARS-CoV-2 among adults in three regions of France following the lockdown and associated risk factors: a multicohort study. 2020: 2020.09.16.20195693.

52. Barchuk A, Skougarevskiy D, Titaev K, et al. Seroprevalence of SARS-CoV-2 antibodies in Saint Petersburg, Russia: a population-based study. 2020: 2020.11.02.20221309.

53. Vos ERA, den Hartog G, Schepp RM, et al. Nationwide seroprevalence of SARS-CoV-2 and identification of risk factors in the general population of the Netherlands during the first epidemic wave. *J Epidemiol Community Health* 2020.

54. Santos-Hövenner C, Neuhauser HK, Rosario AS, et al. Serology- and PCR-based cumulative incidence of SARS-CoV-2 infection in adults in a successfully contained early hotspot (CoMoLo study), Germany, May to June 2020. *Euro Surveill* 2020; **25**(47).

55. Streeck H, Schulte B, Kuemmerer B, et al. Infection fatality rate of SARS-CoV-2 infection in a German community with a super-spreading event. 2020: 2020.05.04.20090076.

56. Snoeck CJ, Vaillant M, Abdelrahman T, et al. Prevalence of SARS-CoV-2 infection in the Luxembourgish population: the CON-VINCE study. 2020: 2020.05.11.20092916.

57. Pollán M, Pérez-Gómez B, Pastor-Barriuso R, et al. Prevalence of SARS-CoV-2 in Spain (ENE-COVID): a nationwide, population-based seroepidemiological study. *Lancet* 2020.
58. Petersen MS, Strøm M, Christiansen DH, et al. Seroprevalence of SARS-CoV-2-Specific Antibodies, Faroe Islands. *Emerg Infect Dis* 2020; **26**(11).
59. Jersey Go. SARS-CoV-2: Prevalence of antibodies in Jersey. 2020.
60. Vu SL, Jones G, Anna F, et al. Prevalence of SARS-CoV-2 antibodies in France: results from nationwide serological surveillance. 2020: 2020.10.20.20213116.
61. Dimeglio C, Herin F, Miedougé M, et al. Screening for SARS-CoV-2 antibodies among healthcare workers in a university hospital in southern France. *J Infect* 2020.
62. Dillner J, Elfström KM, Blomqvist J, et al. Screening for high amounts of SARS-CoV-2 identifies pre-symptomatic subjects among healthy healthcare workers. 2020: 2020.12.13.20248122.
63. Jespersen S, Mikkelsen S, Greve T, et al. SARS-CoV-2 seroprevalence survey among 18,000 healthcare and administrative personnel at hospitals, pre-hospital services, and specialist practitioners in the Central Denmark Region. 2020: 2020.08.10.20171850.
64. Health NIoP. Seroprevalence of SARS-CoV-2 in the Norwegian population measured in residual sera collected in April/May 2020 and August 2019. 2020. <https://www.fhi.no/en/publ/2020/seroprevalence-of-sars-cov-2-in-the-norwegian-population--measured-in-resid/> (accessed Dec 22 2020).
65. Anna F, Goyard S, Lalanne AI, et al. High seroprevalence but short-lived immune response to SARS-CoV-2 infection in Paris. 2020: 2020.10.25.20219030.

66. Roederer T, Mollo B, Vincent C, et al. High seroprevalence of SARS-CoV-2 antibodies among people living in precarious situations in Ile de France. 2020: 2020.10.07.20207795.
67. Slot E, Hogema BM, Reusken C, et al. Low SARS-CoV-2 seroprevalence in blood donors in the early COVID-19 epidemic in the Netherlands. *Nature communications* 2020; **11**(1): 5744.
68. Jõgi P, Soeorg H, Ingerainen D, et al. Seroprevalence of SARS-CoV-2 IgG antibodies in two regions of Estonia (KoroSero-EST-1). 2020: 2020.10.21.20216820.
69. Berte R, Mazza S, Stefanucci MR, et al. Seroprevalence of SARS-CoV2 in IBD patients treated with biological therapy. *Journal of Crohn's & colitis* 2020.
70. Bloomfield M, Pospisilova I, Cabelova T, et al. Searching for COVID-19 Antibodies in Czech Children-A Needle in the Haystack. *Frontiers in pediatrics* 2020; **8**: 597736.
71. Ulyte A, Radtke T, Abela IA, et al. Clustering and longitudinal change in SARS-CoV-2 seroprevalence in school-children: prospective cohort study of 55 schools in Switzerland. 2020: 2020.12.19.20248513.
72. Valenti L, Bergna A, Pelusi S, et al. SARS-CoV-2 seroprevalence trends in healthy blood donors during the COVID-19 Milan outbreak. 2020: 2020.05.11.20098442.
73. Erikstrup C, Hother CE, Pedersen OBV, et al. Estimation of SARS-CoV-2 infection fatality rate by real-time antibody screening of blood donors. *Clin Infect Dis* 2020.



74. Bogogiannidou Z, Vontas A, Dadouli K, et al. Repeated leftover serosurvey of SARS-CoV-2 IgG antibodies, Greece, March and April 2020. *Euro Surveill* 2020; **25**(31).
75. Plebani M, Padoan A, Fedeli U, et al. SARS-CoV-2 serosurvey in health care workers of the Veneto Region. *Clinical chemistry and laboratory medicine* 2020.
76. Woon YL, Lee YL, Chong YM, et al. Serology surveillance of anti-SARS-CoV-2 antibodies among asymptomatic healthcare workers in Malaysian healthcare facilities designated for COVID-19 care. Research Square; 2020.
77. Nopsopon T, Pongpirul K, Chotirosniramit K, Hiransuthikul N. COVID-19 Antibody in Thai Community Hospitals. 2020: 2020.06.24.20139188.
78. Murhekar MV, Bhatnagar T, Selvaraju S, et al. Prevalence of SARS-CoV-2 infection in India: Findings from the national serosurvey, May-June 2020. *Indian J Med Res* 2020; **152**(1 & 2): 48-60.
79. Murhekar M. SARS-CoV-2 Antibody Prevalence in India: Findings from the Second Nationwide Household Serosurvey, August - September 2020. *SSRN* 2020.
80. Malani A, Shah D, Kang G, et al. Seroprevalence of SARS-CoV-2 in slums versus non-slums in Mumbai, India. *The Lancet Global health* 2020.
81. Sharma N, Sharma P, Basu S, et al. The seroprevalence and trends of SARS-CoV-2 in Delhi, India: A repeated population-based seroepidemiological study. 2020: 2020.12.13.20248123.
82. Ray A, Singh K, Chattopadhyay S, et al. Seroprevalence of anti-SARS-CoV-2 IgG antibodies in hospitalized patients at a tertiary referral center in North India. 2020: 2020.08.22.20179937.

83. Chen Y, Tong X, Wang J, et al. High SARS-CoV-2 antibody prevalence among healthcare workers exposed to COVID-19 patients. *J Infect* 2020.
84. Ko JH, Lee JY, Kim HA, et al. Serologic Evaluation of Healthcare Workers Caring for COVID-19 Patients in the Republic of Korea. *Frontiers in microbiology* 2020; **11**: 587613.
85. Wang X, Gao W, Cui S, et al. A population-based seroprevalence survey of severe acute respiratory syndrome coronavirus 2 infection in Beijing, China. 2020: 2020.09.23.20197756.
86. Ling R, Yu Y, He J, et al. Seroprevalence and epidemiological characteristics of immunoglobulin M and G antibodies against SARS-CoV-2 in asymptomatic people in Wuhan, China. *medRxiv* 2020: 2020.06.16.20132423.
87. Kelvin Kai-Wang To\* VC-CC, Jian-Piao Cai\*, Kwok-Hung Chan\*, Lin-Lei Chen, Lok-Hin Wong, Charlotte Yee-Ki Choi,, Carol Ho-Yan Fong AC-KN, Lu Lu, Cui-Ting Luo, Jianwen Situ, Tom Wai-Hin Chung, Shuk-Ching Wong, Grace See-Wai Kwan,, Siddharth Sridhar JF-WC, Cecilia Yuen-Man Fan, Vivien W M Chuang, Kin-Hang Kok, Ivan Fan-Ngai Hung, Kwok-Yung Yuen. Seroprevalence of SARS-CoV-2 in Hong Kong and in residents evacuated from Hubei province, China: a multicohort study. *Lancet Microbe* 2020.
88. Ho H-L, Wang F-Y, Lee H-R, et al. Seroprevalence of COVID-19 in Taiwan revealed by testing anti-SARS-CoV-2 serological antibodies on 14,765 hospital patients. *The Lancet Regional Health – Western Pacific* 2020; **3**.
89. Sam IC, Chong YM, Tan CW, Chan YF. Low post-pandemic wave SARS-CoV-2 seroprevalence in Kuala Lumpur and Selangor, Malaysia. *J Med Virol* 2020.
90. Xu X, Nie S, Sun J, et al. The Cumulative Rate of SARS-CoV-2 Infection in Chinese Hemodialysis Patients. *Kidney international reports* 2020.

91. US.FDA. EUA Authorized Serology Test Performance. 2020.  
<https://www.fda.gov/medical-devices/coronavirus-disease-2019-covid-19-emergency-use-authorizations-medical-devices/vitro-diagnostics-euas>  
(accessed Dec 22 2020).
92. den Hartog G, Schepp RM, Kuijer M, et al. SARS-CoV-2-Specific Antibody Detection for Seroepidemiology: A Multiplex Analysis Approach Accounting for Accurate Seroprevalence. *J Infect Dis* 2020; **222**(9): 1452-61.
93. Dillner J, Elfström M, Blomqvist J, et al. Antibodies to SARS-CoV-2 and risk of future sickness. 2020: 2020.09.14.20194308.
94. England. PH. Evaluation of sensitivity and specificity of four commercially available SARS-CoV-2 antibody immunoassays. 2020.  
[https://assets.publishing.service.gov.uk/government/uploads/system/uploads/attachment\\_data/file/898437/Evaluation\\_of\\_sensitivity\\_and\\_specificity\\_of\\_4\\_commercially\\_available\\_SARS-CoV-2\\_antibody\\_immunoassays.pdf](https://assets.publishing.service.gov.uk/government/uploads/system/uploads/attachment_data/file/898437/Evaluation_of_sensitivity_and_specificity_of_4_commercially_available_SARS-CoV-2_antibody_immunoassays.pdf) (accessed Dec 22 2020).
